# Supplementary material
Source: MDPI journal article supplement (https://www.mdpi.com/2073-4344/7/1/33)

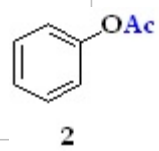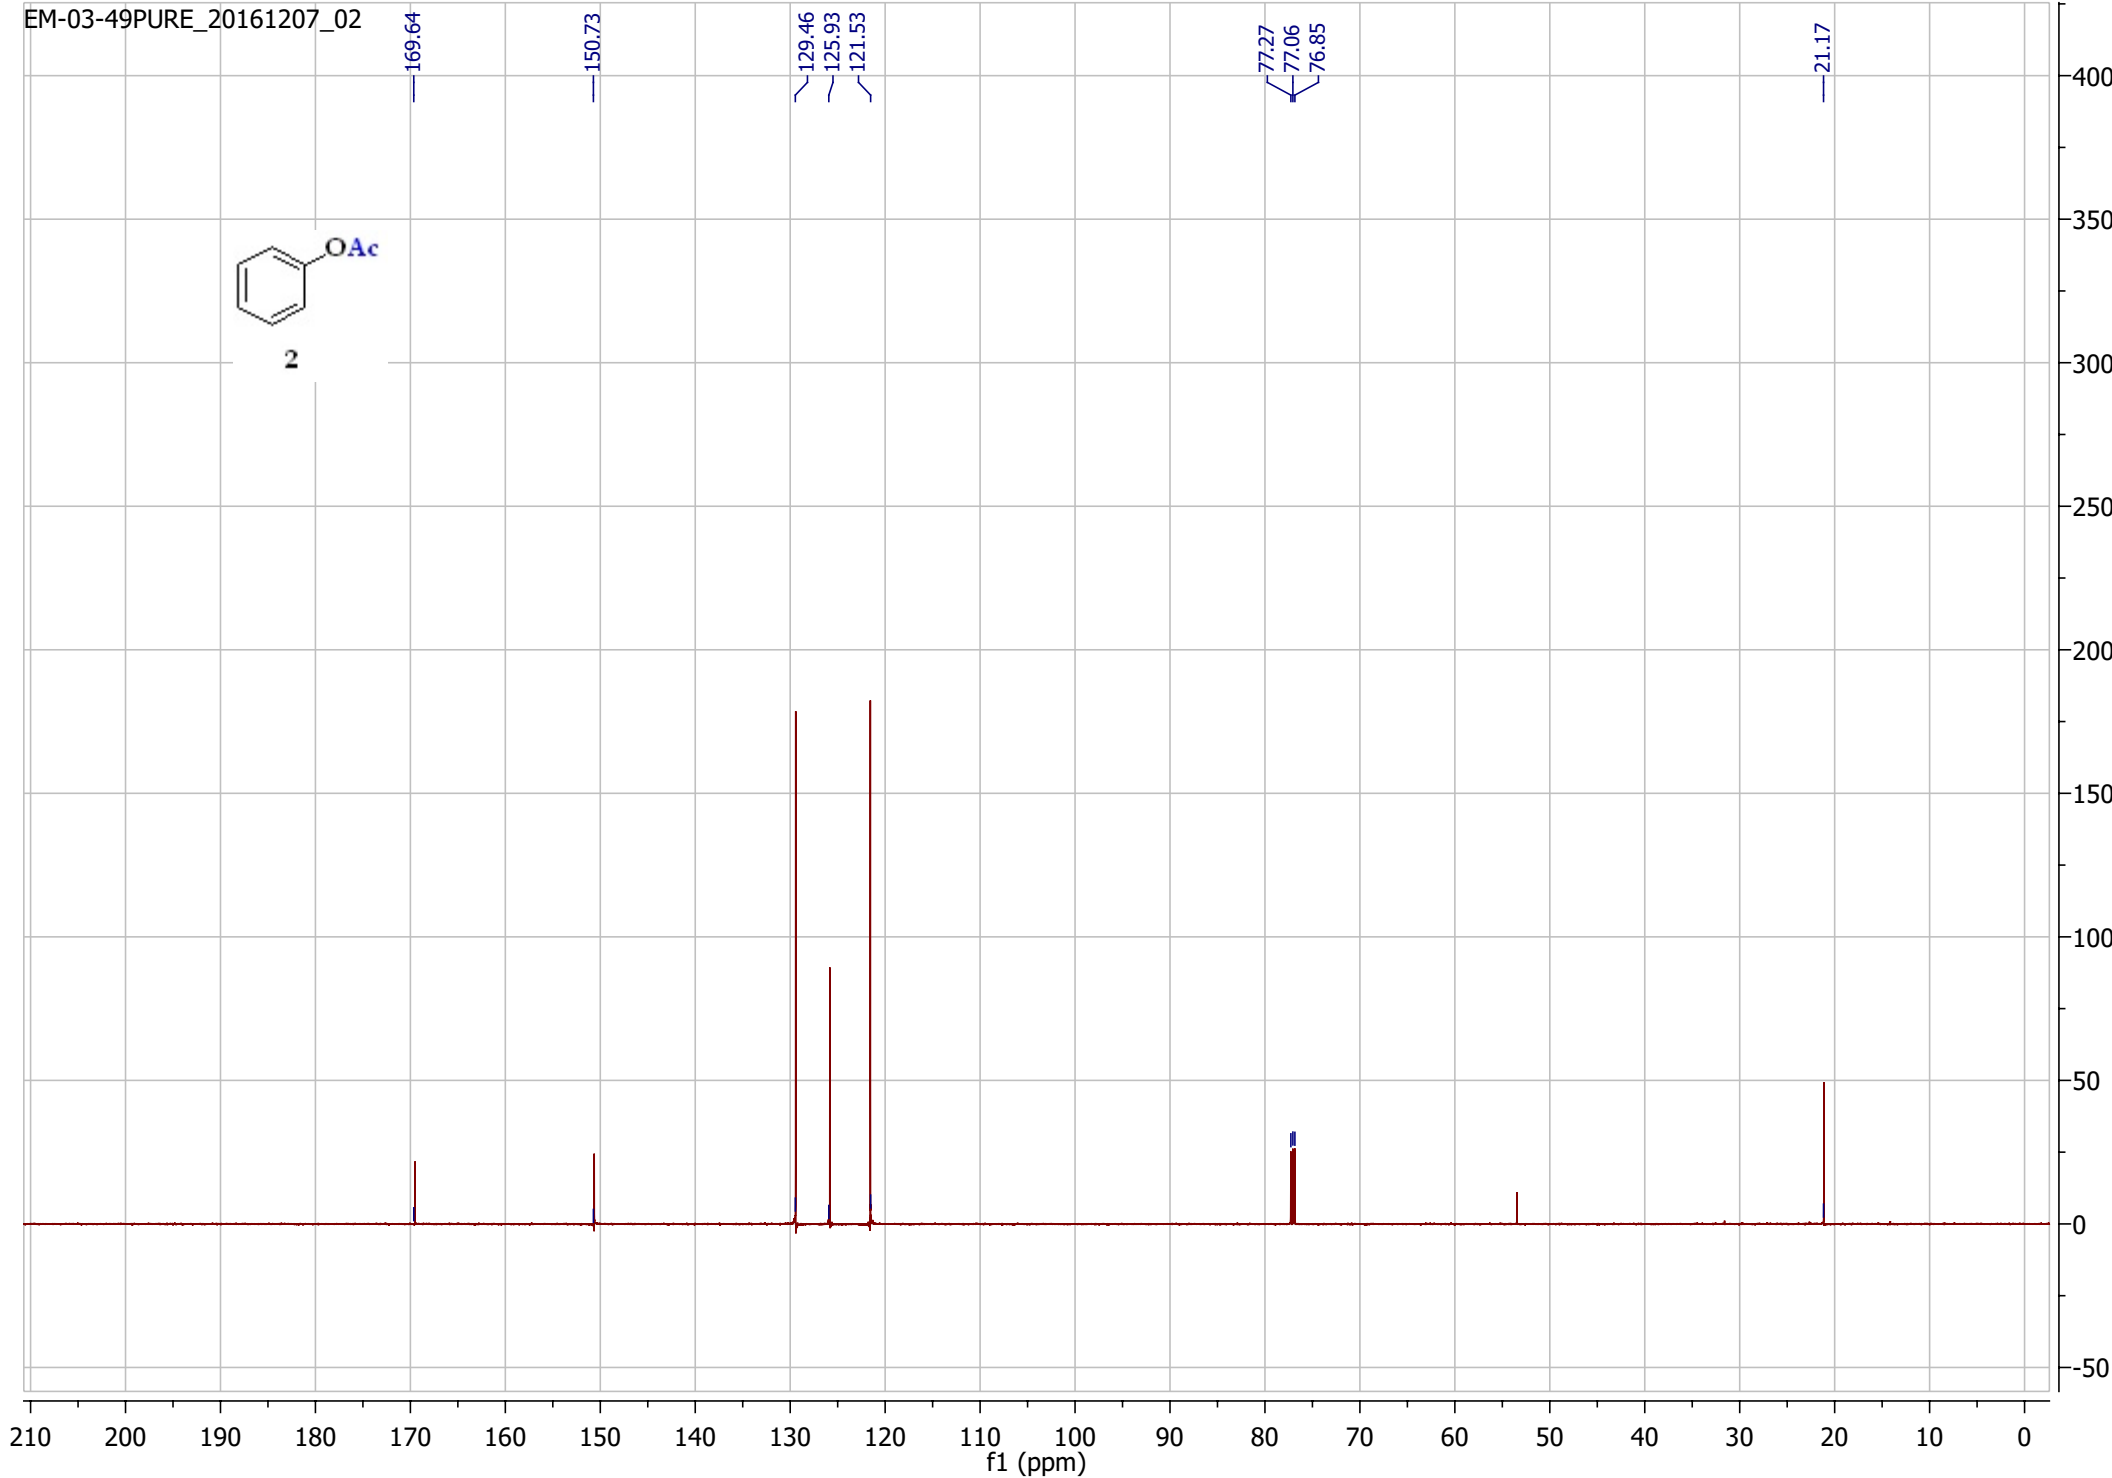

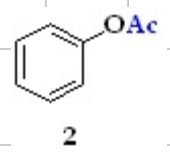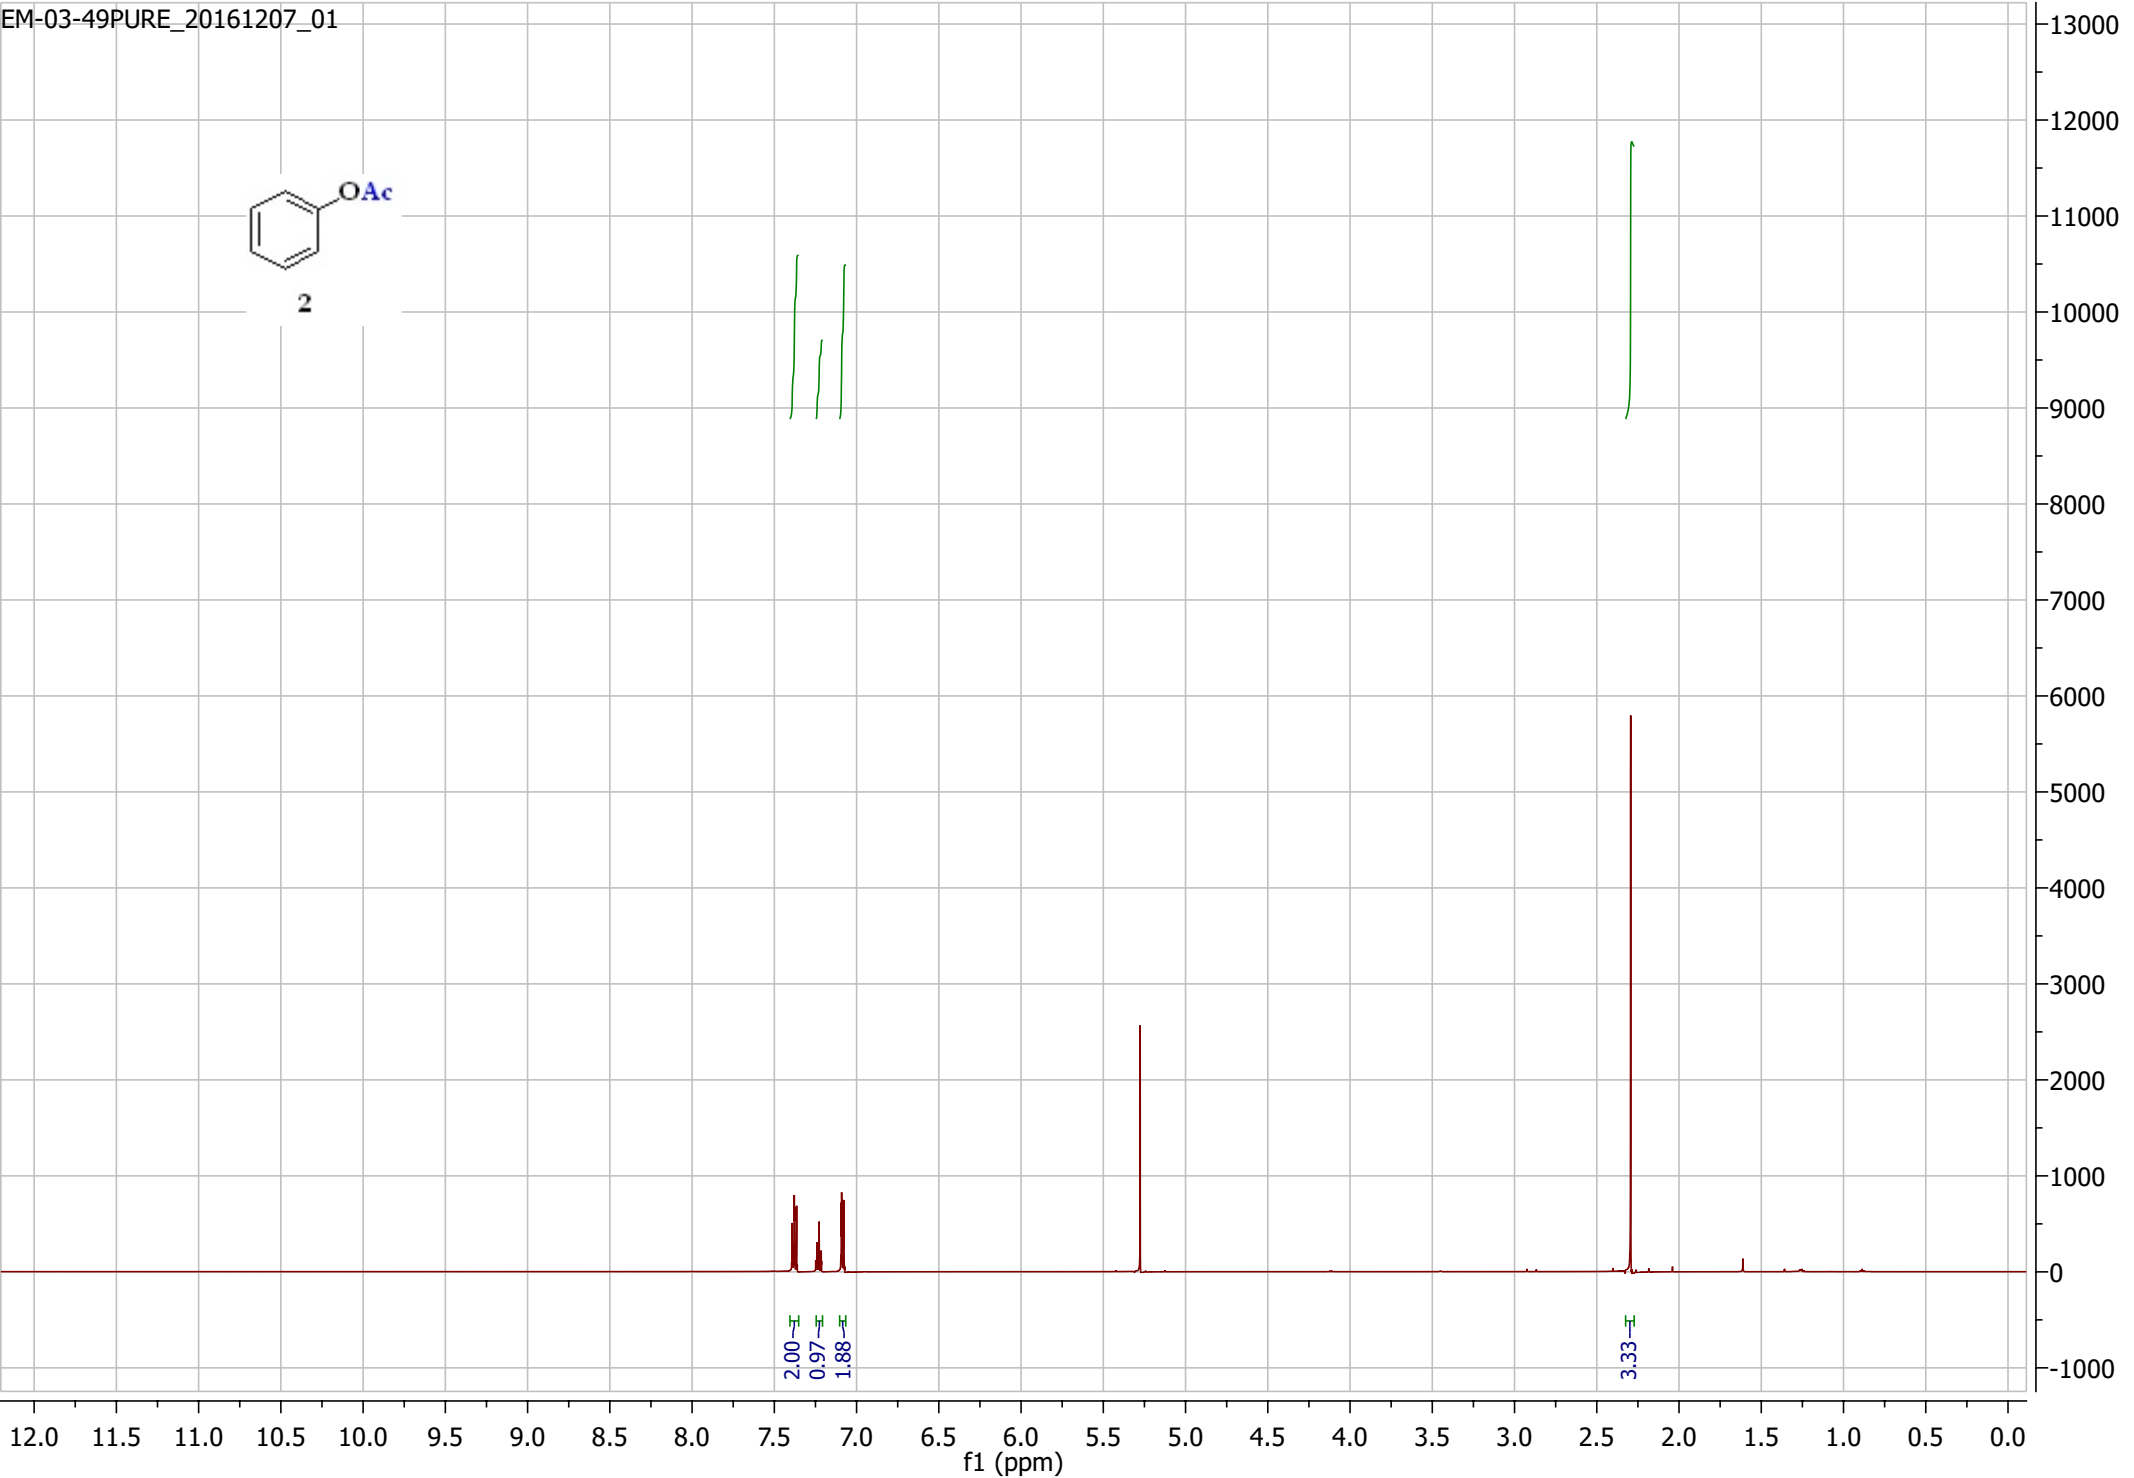

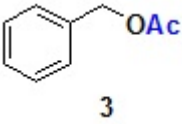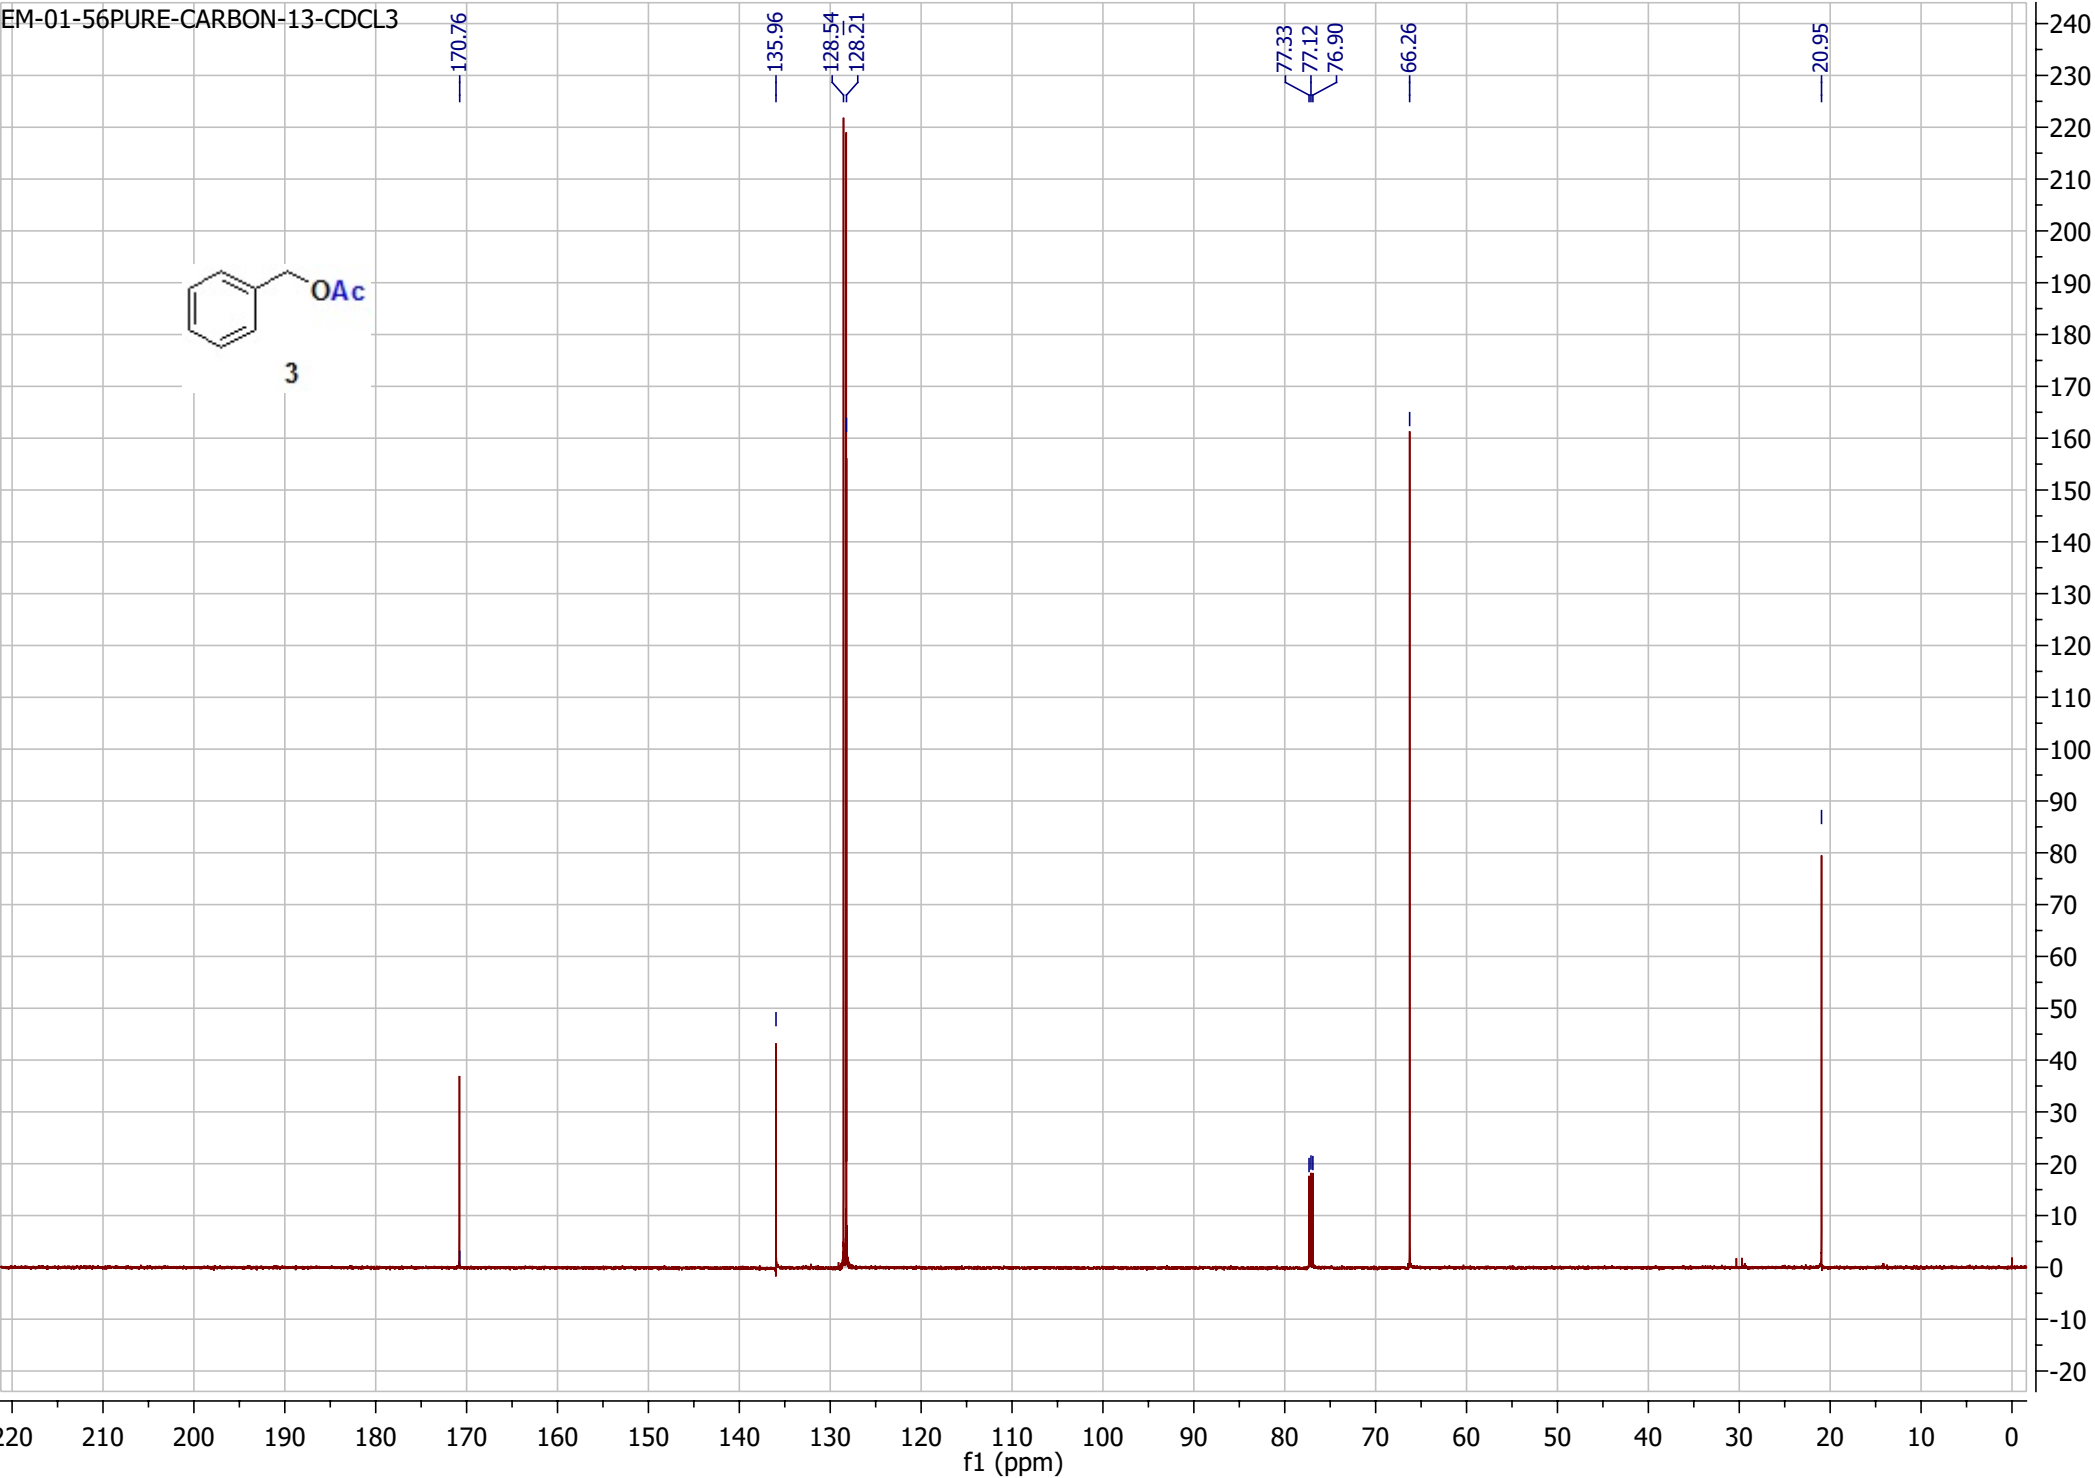

EM-01-56PURE-CDCL3

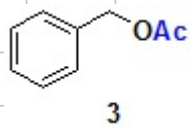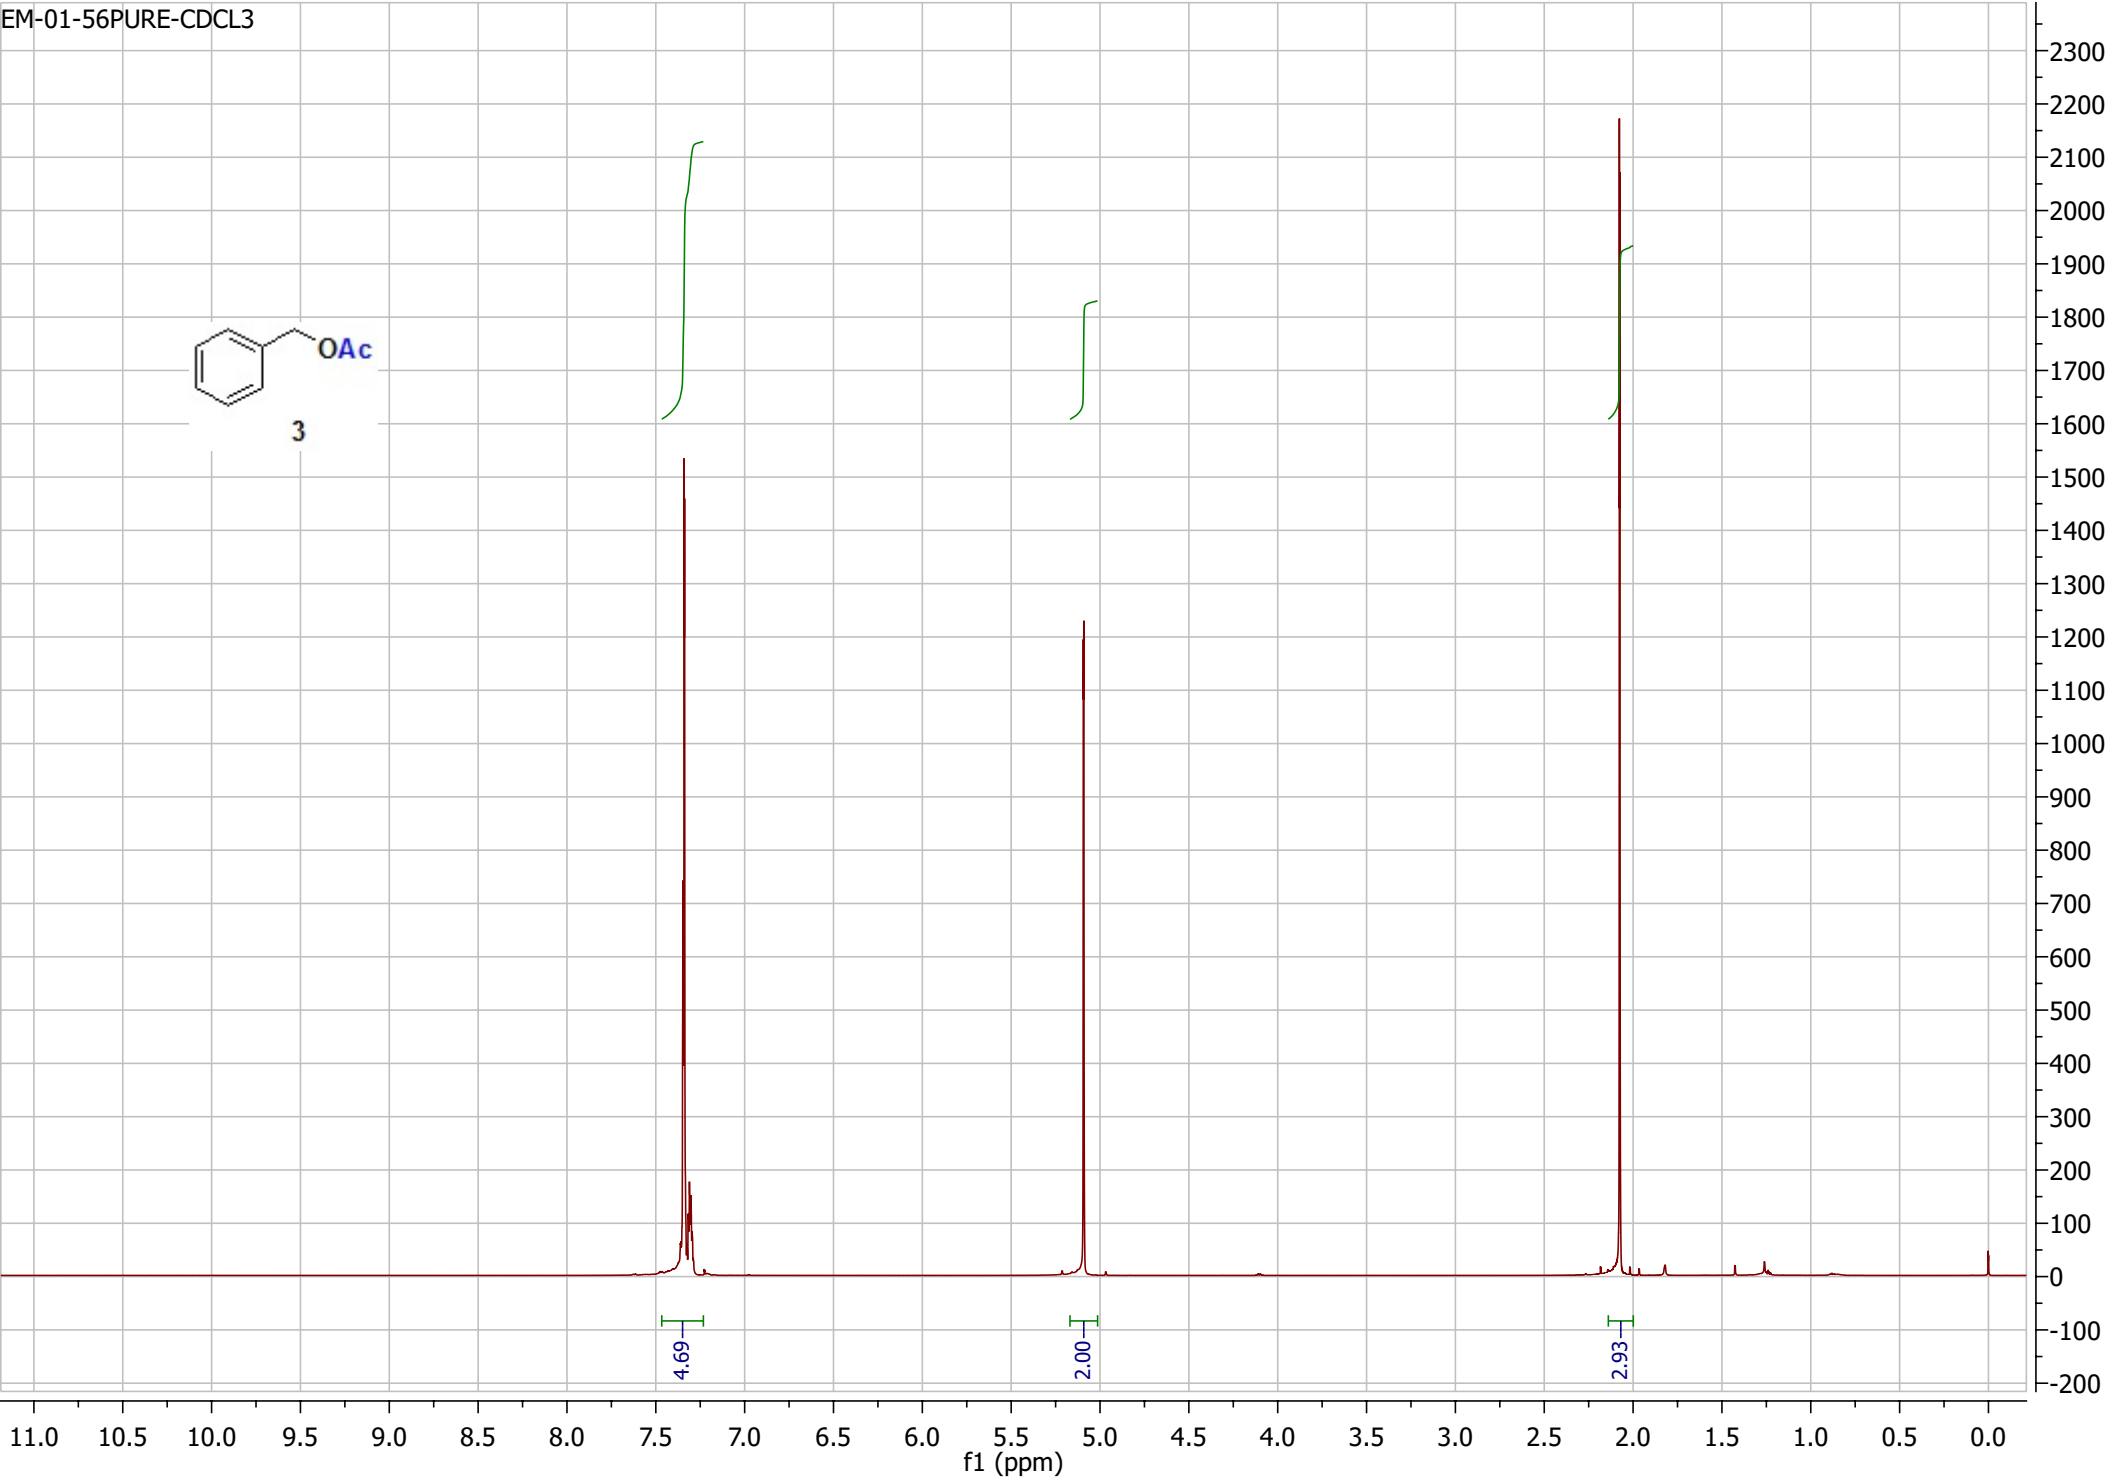



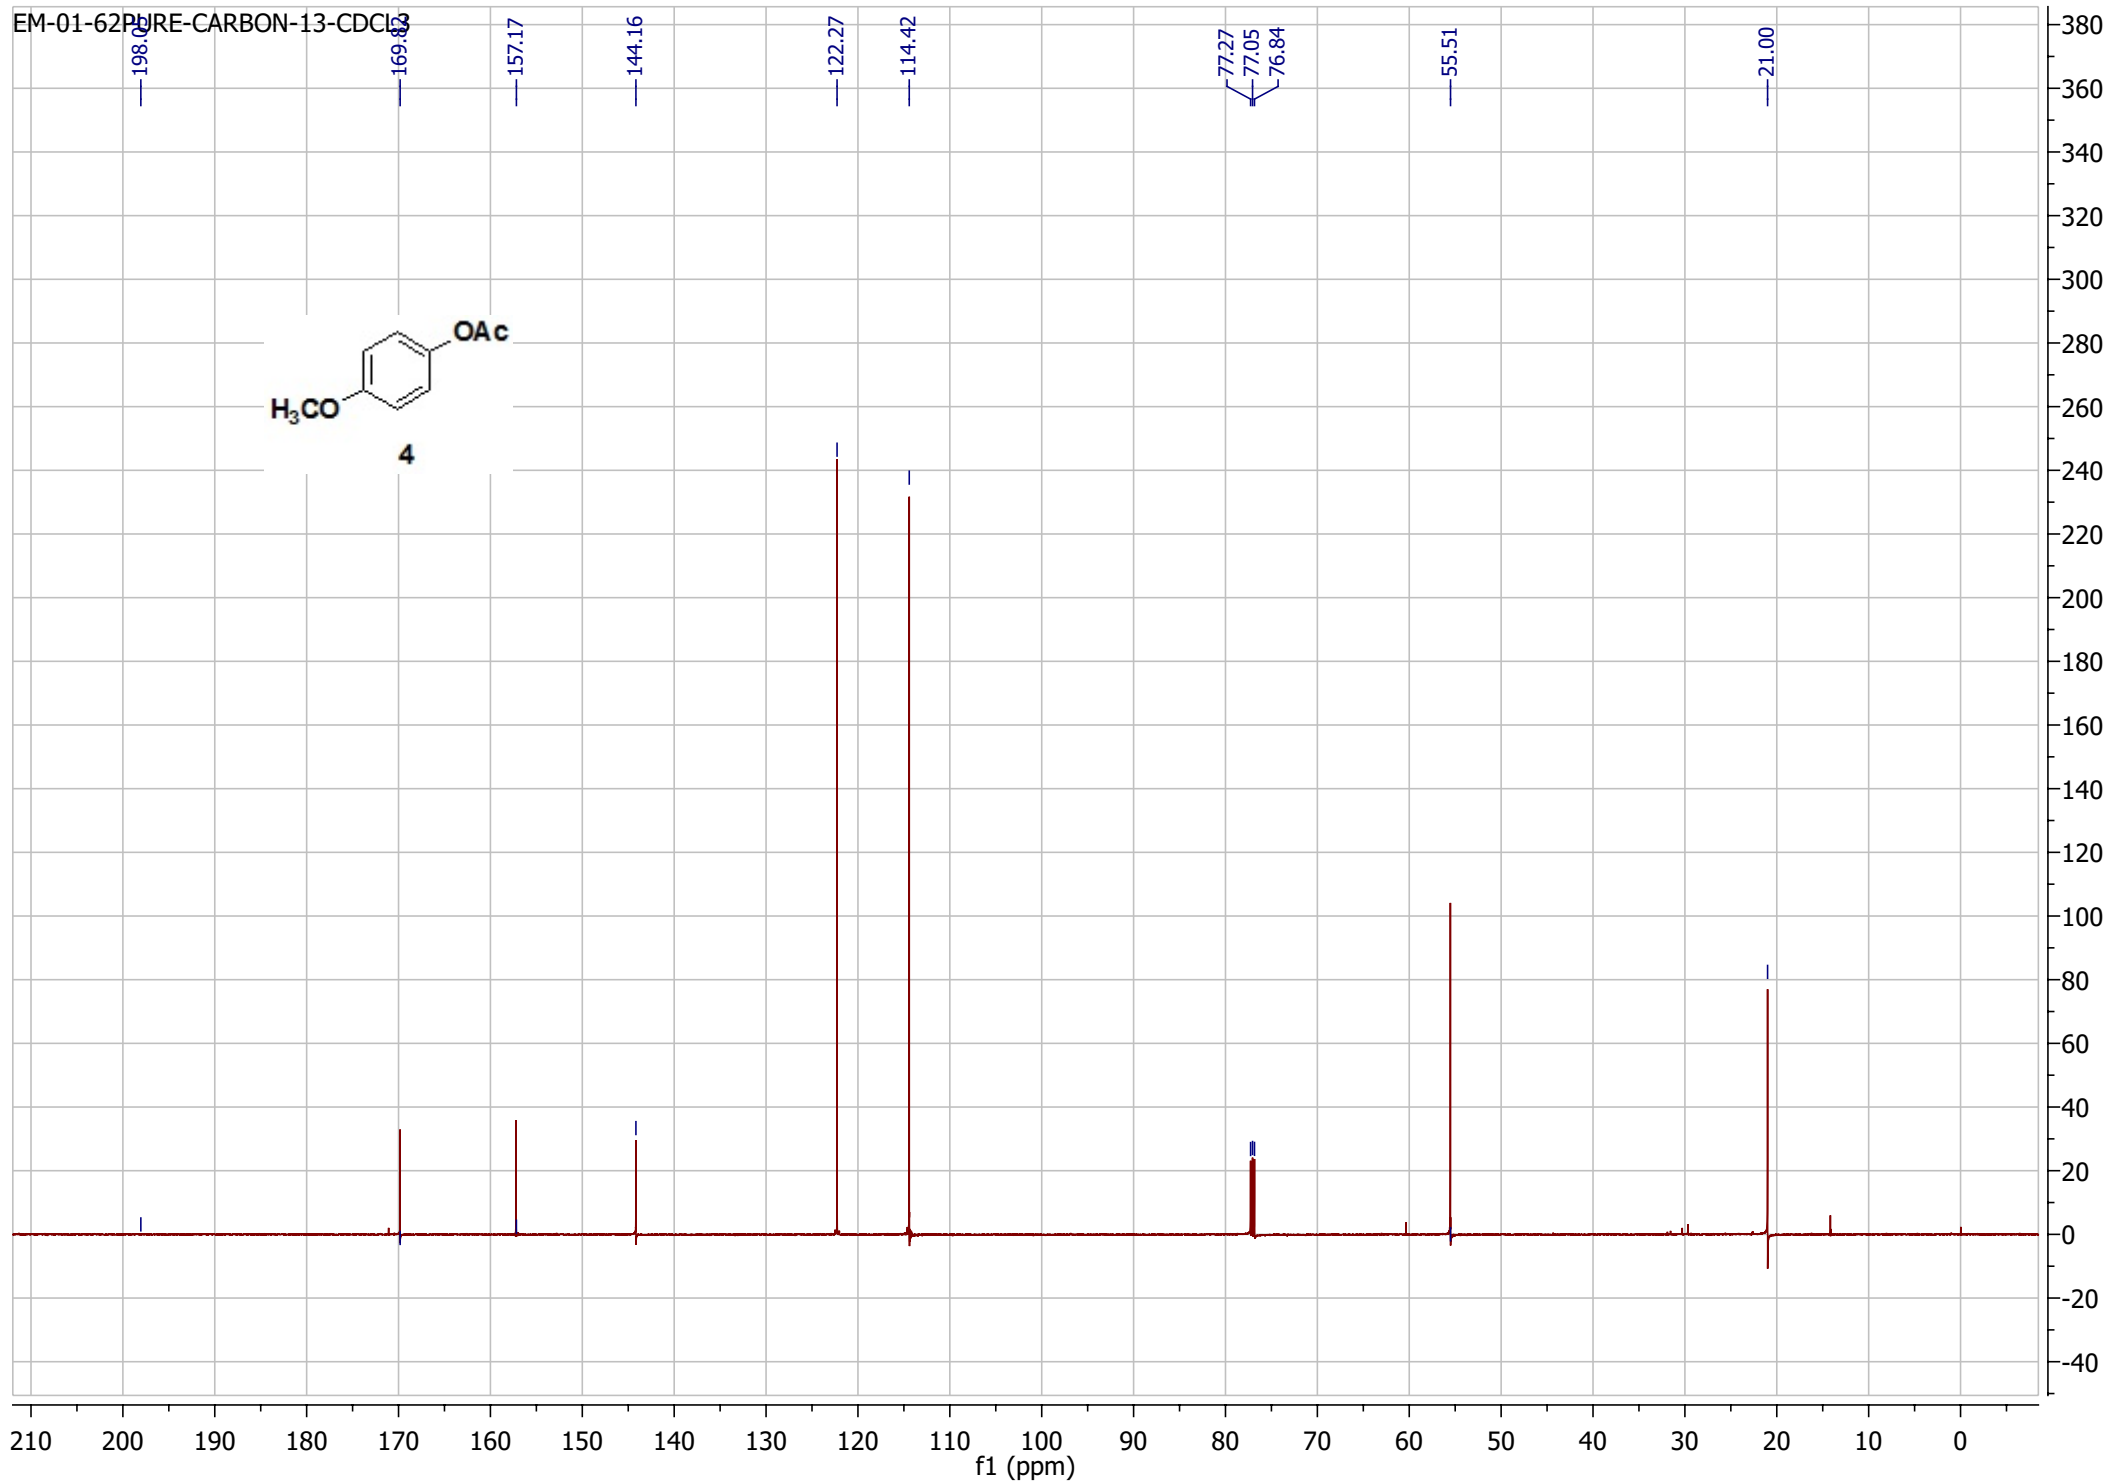

EM-01-62PURE-CDCL3

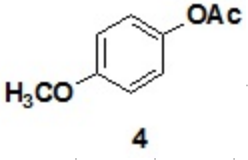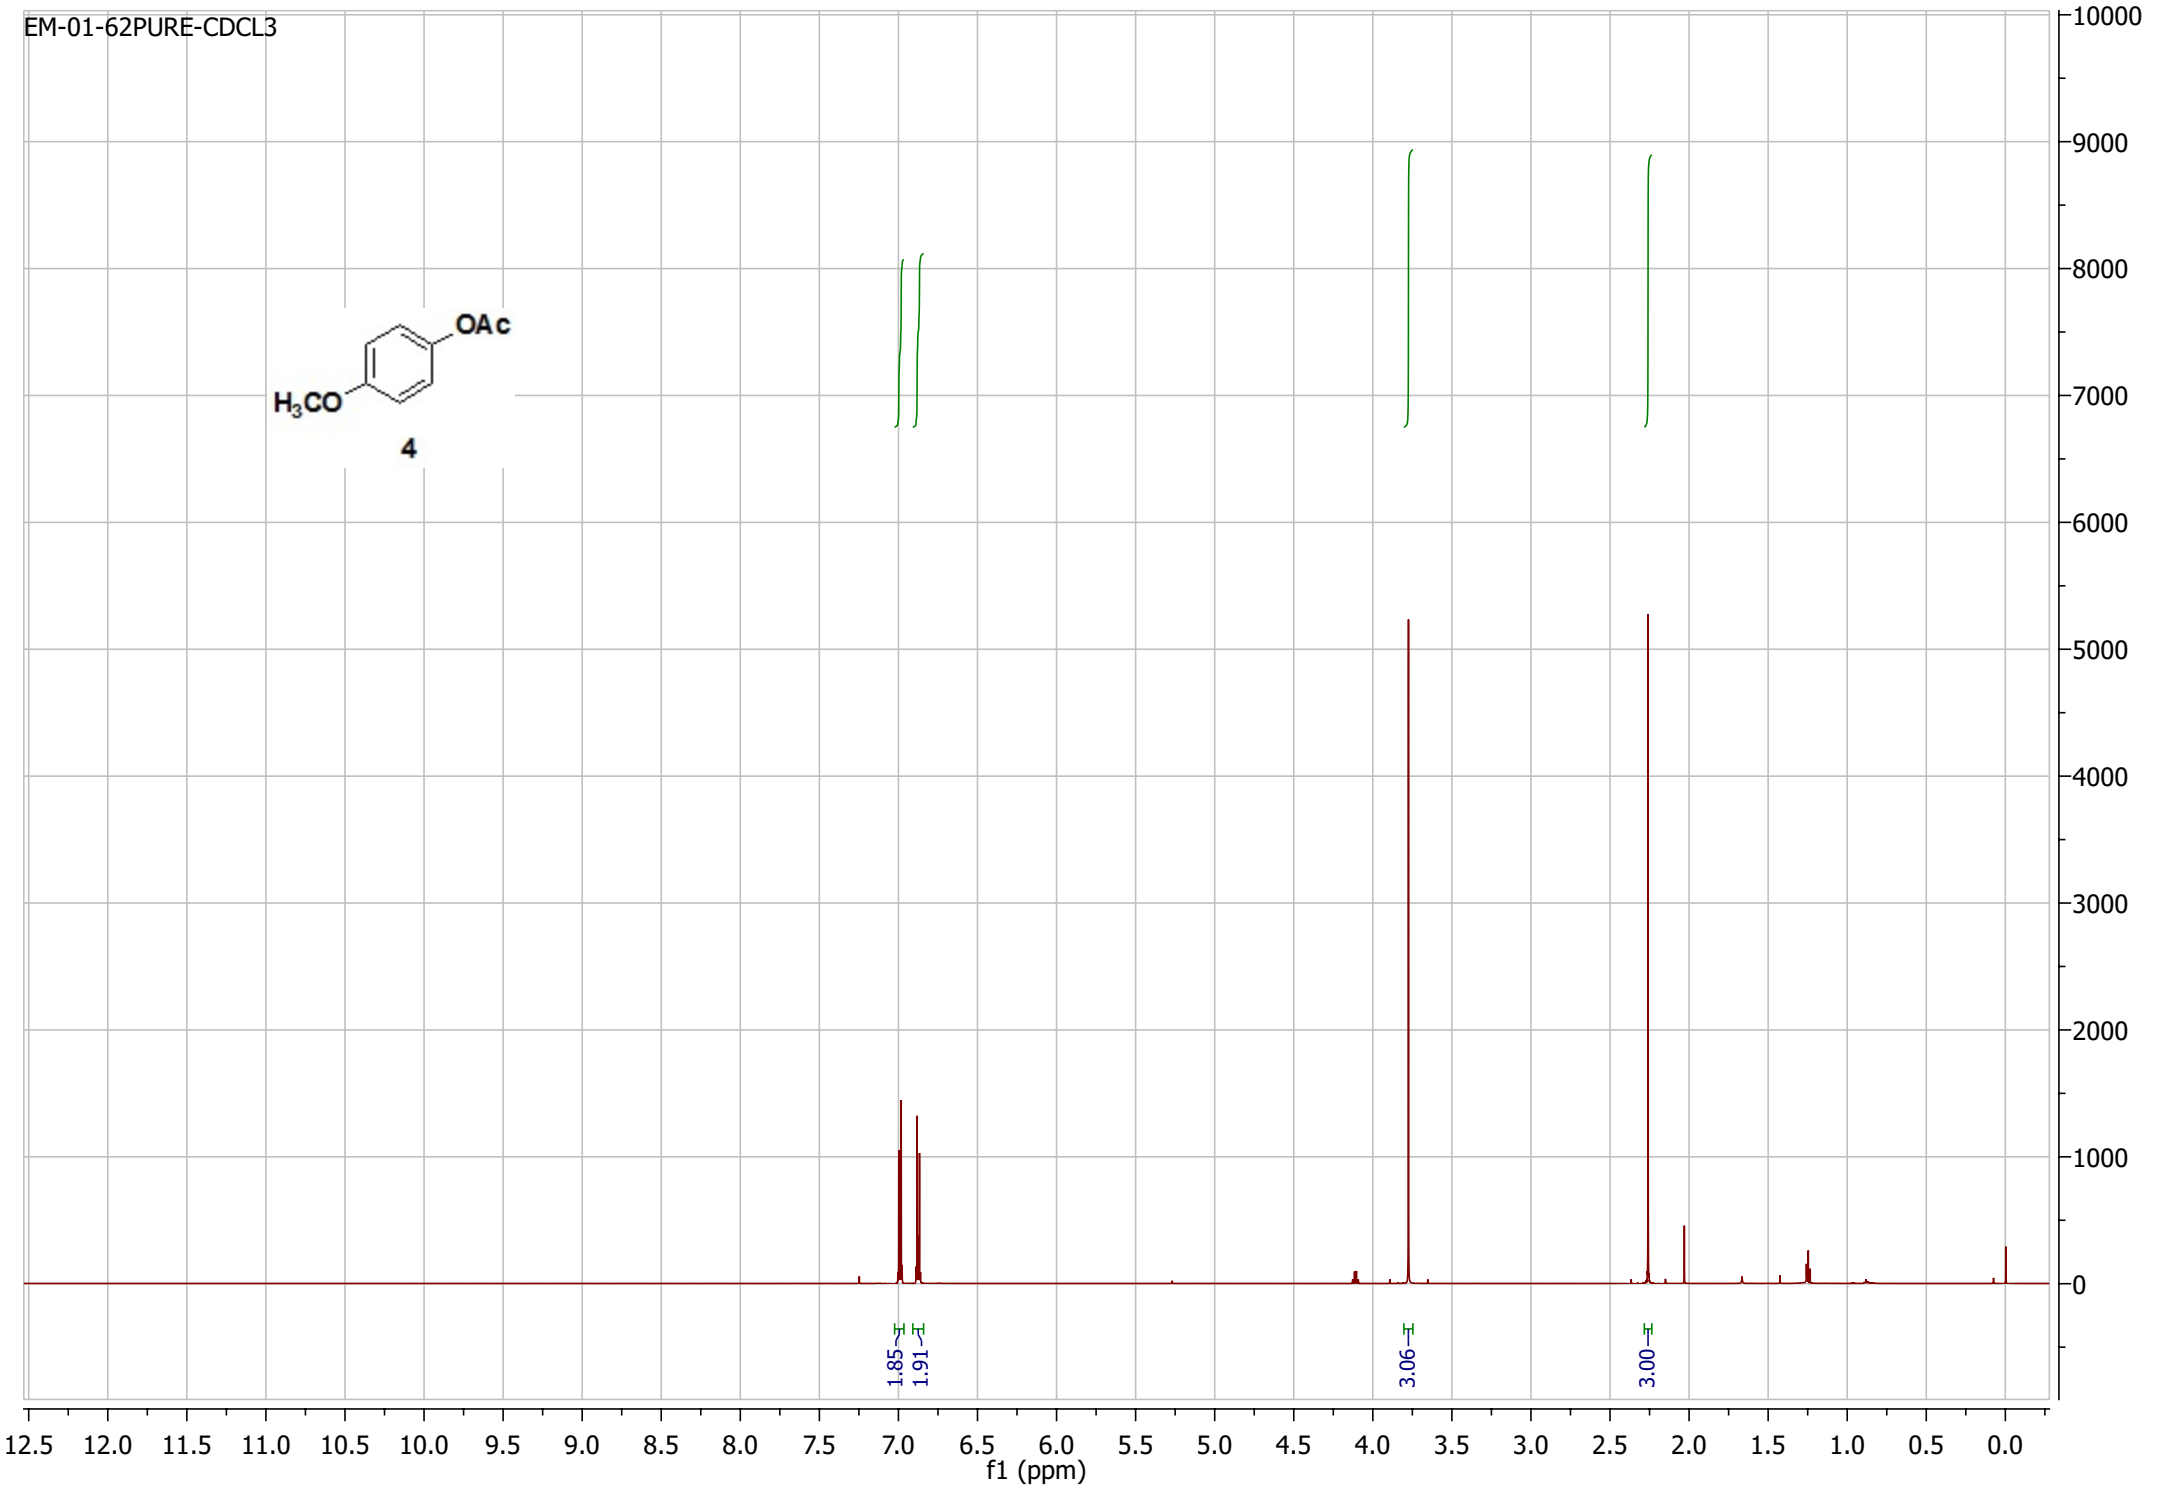

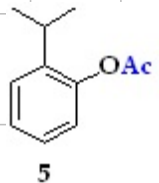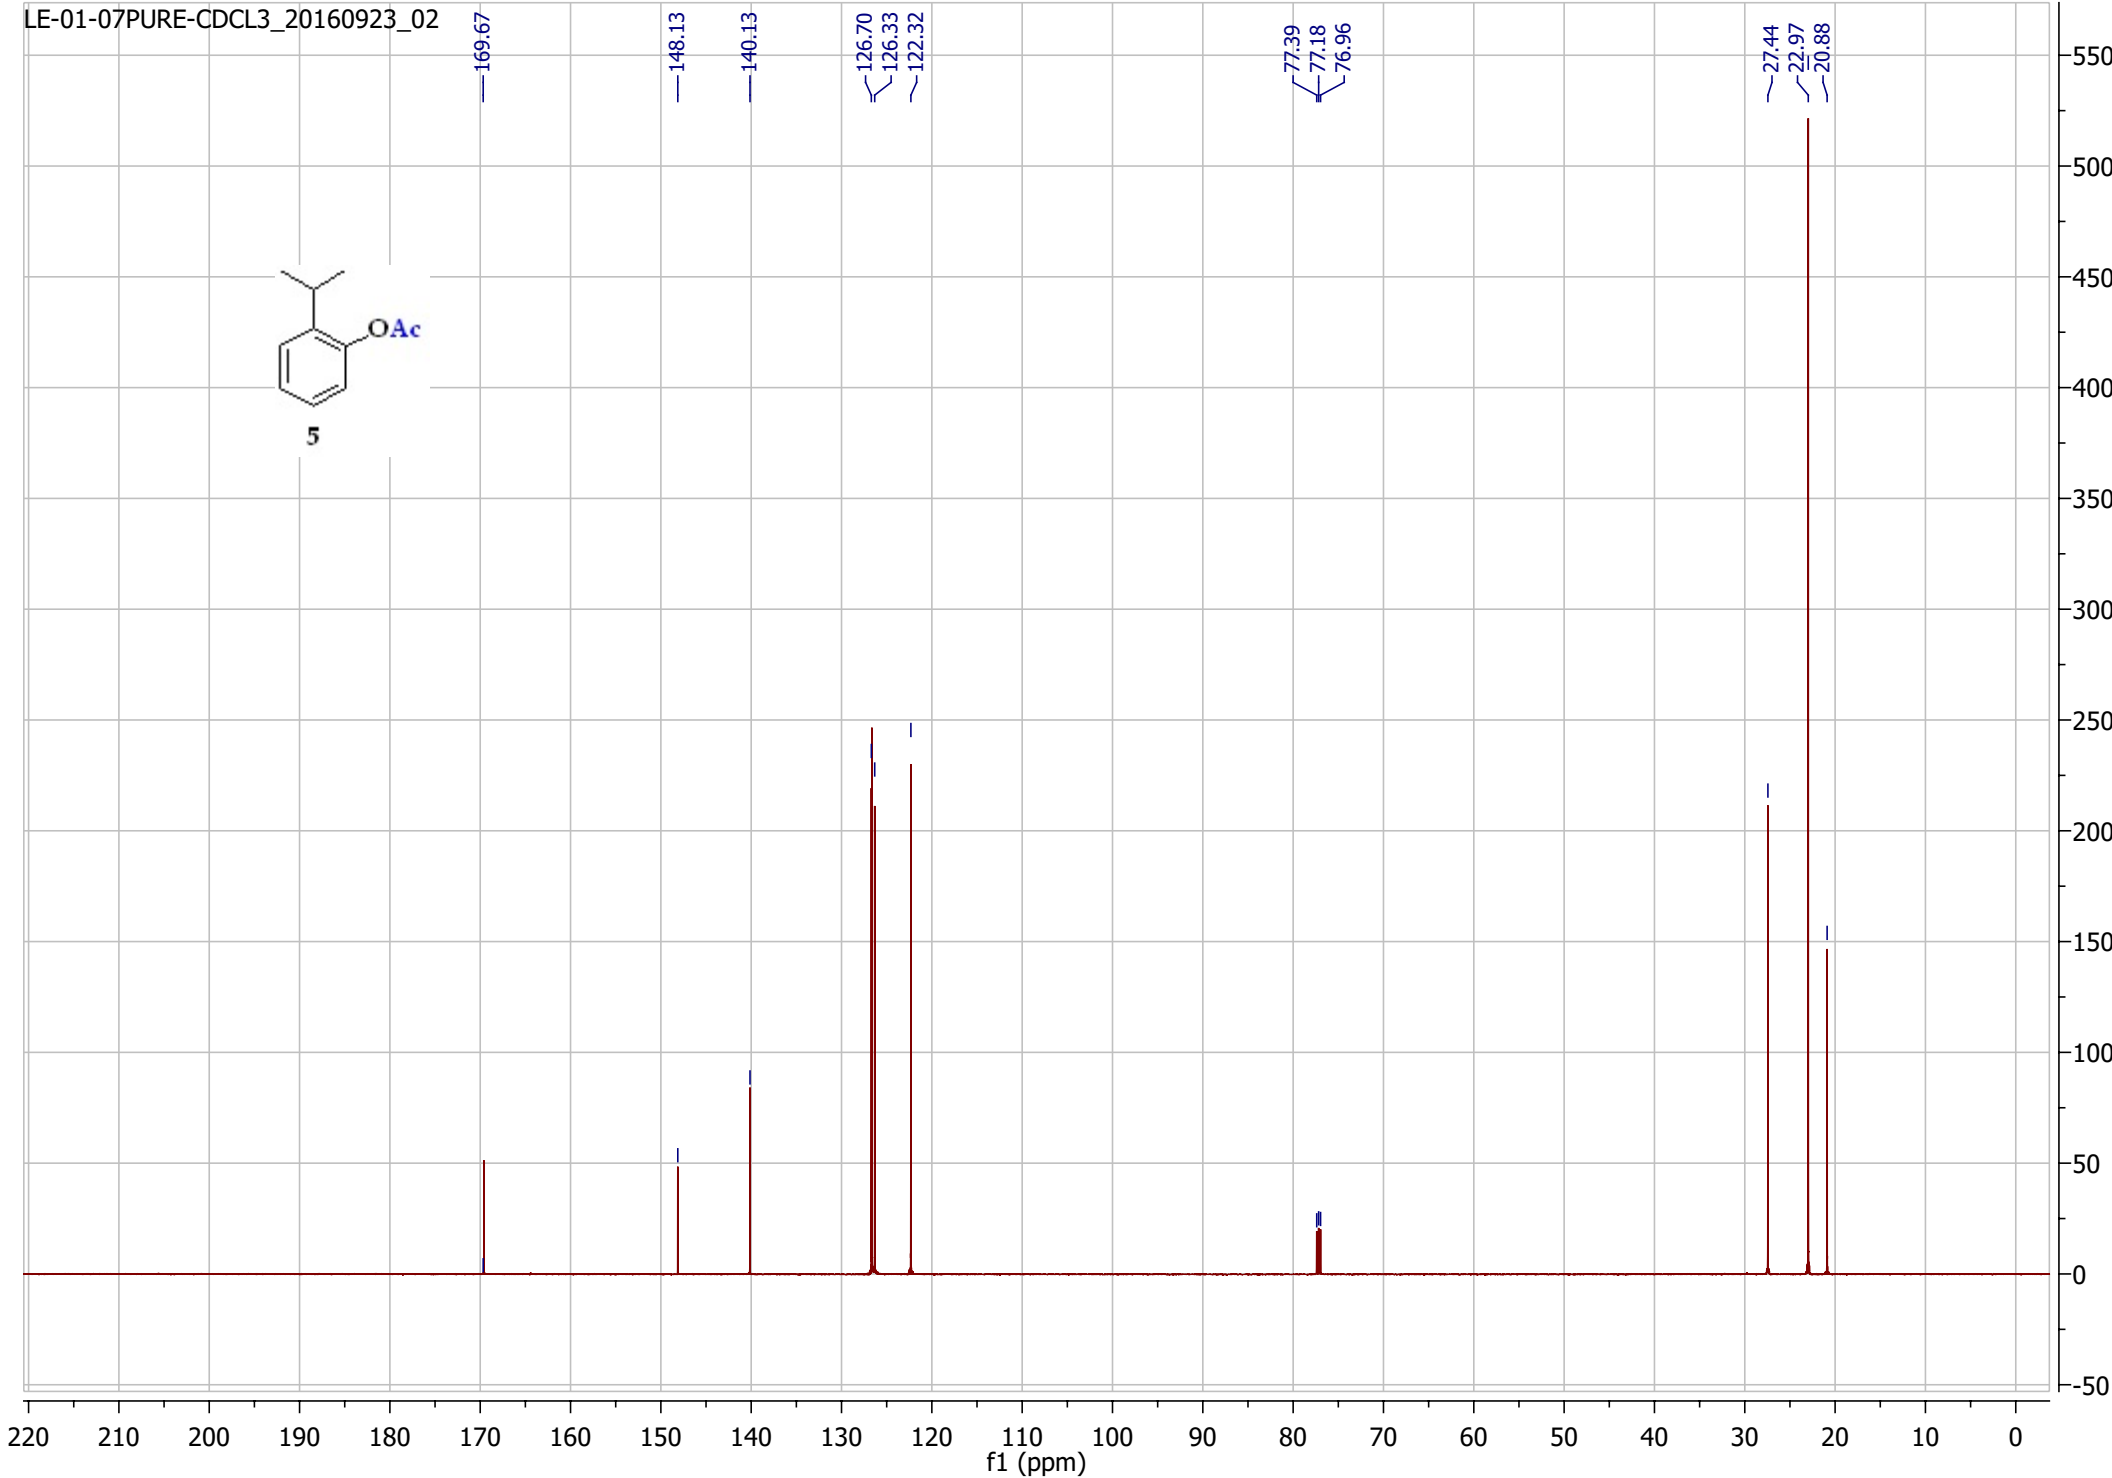

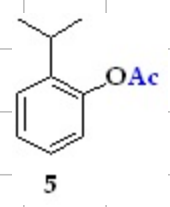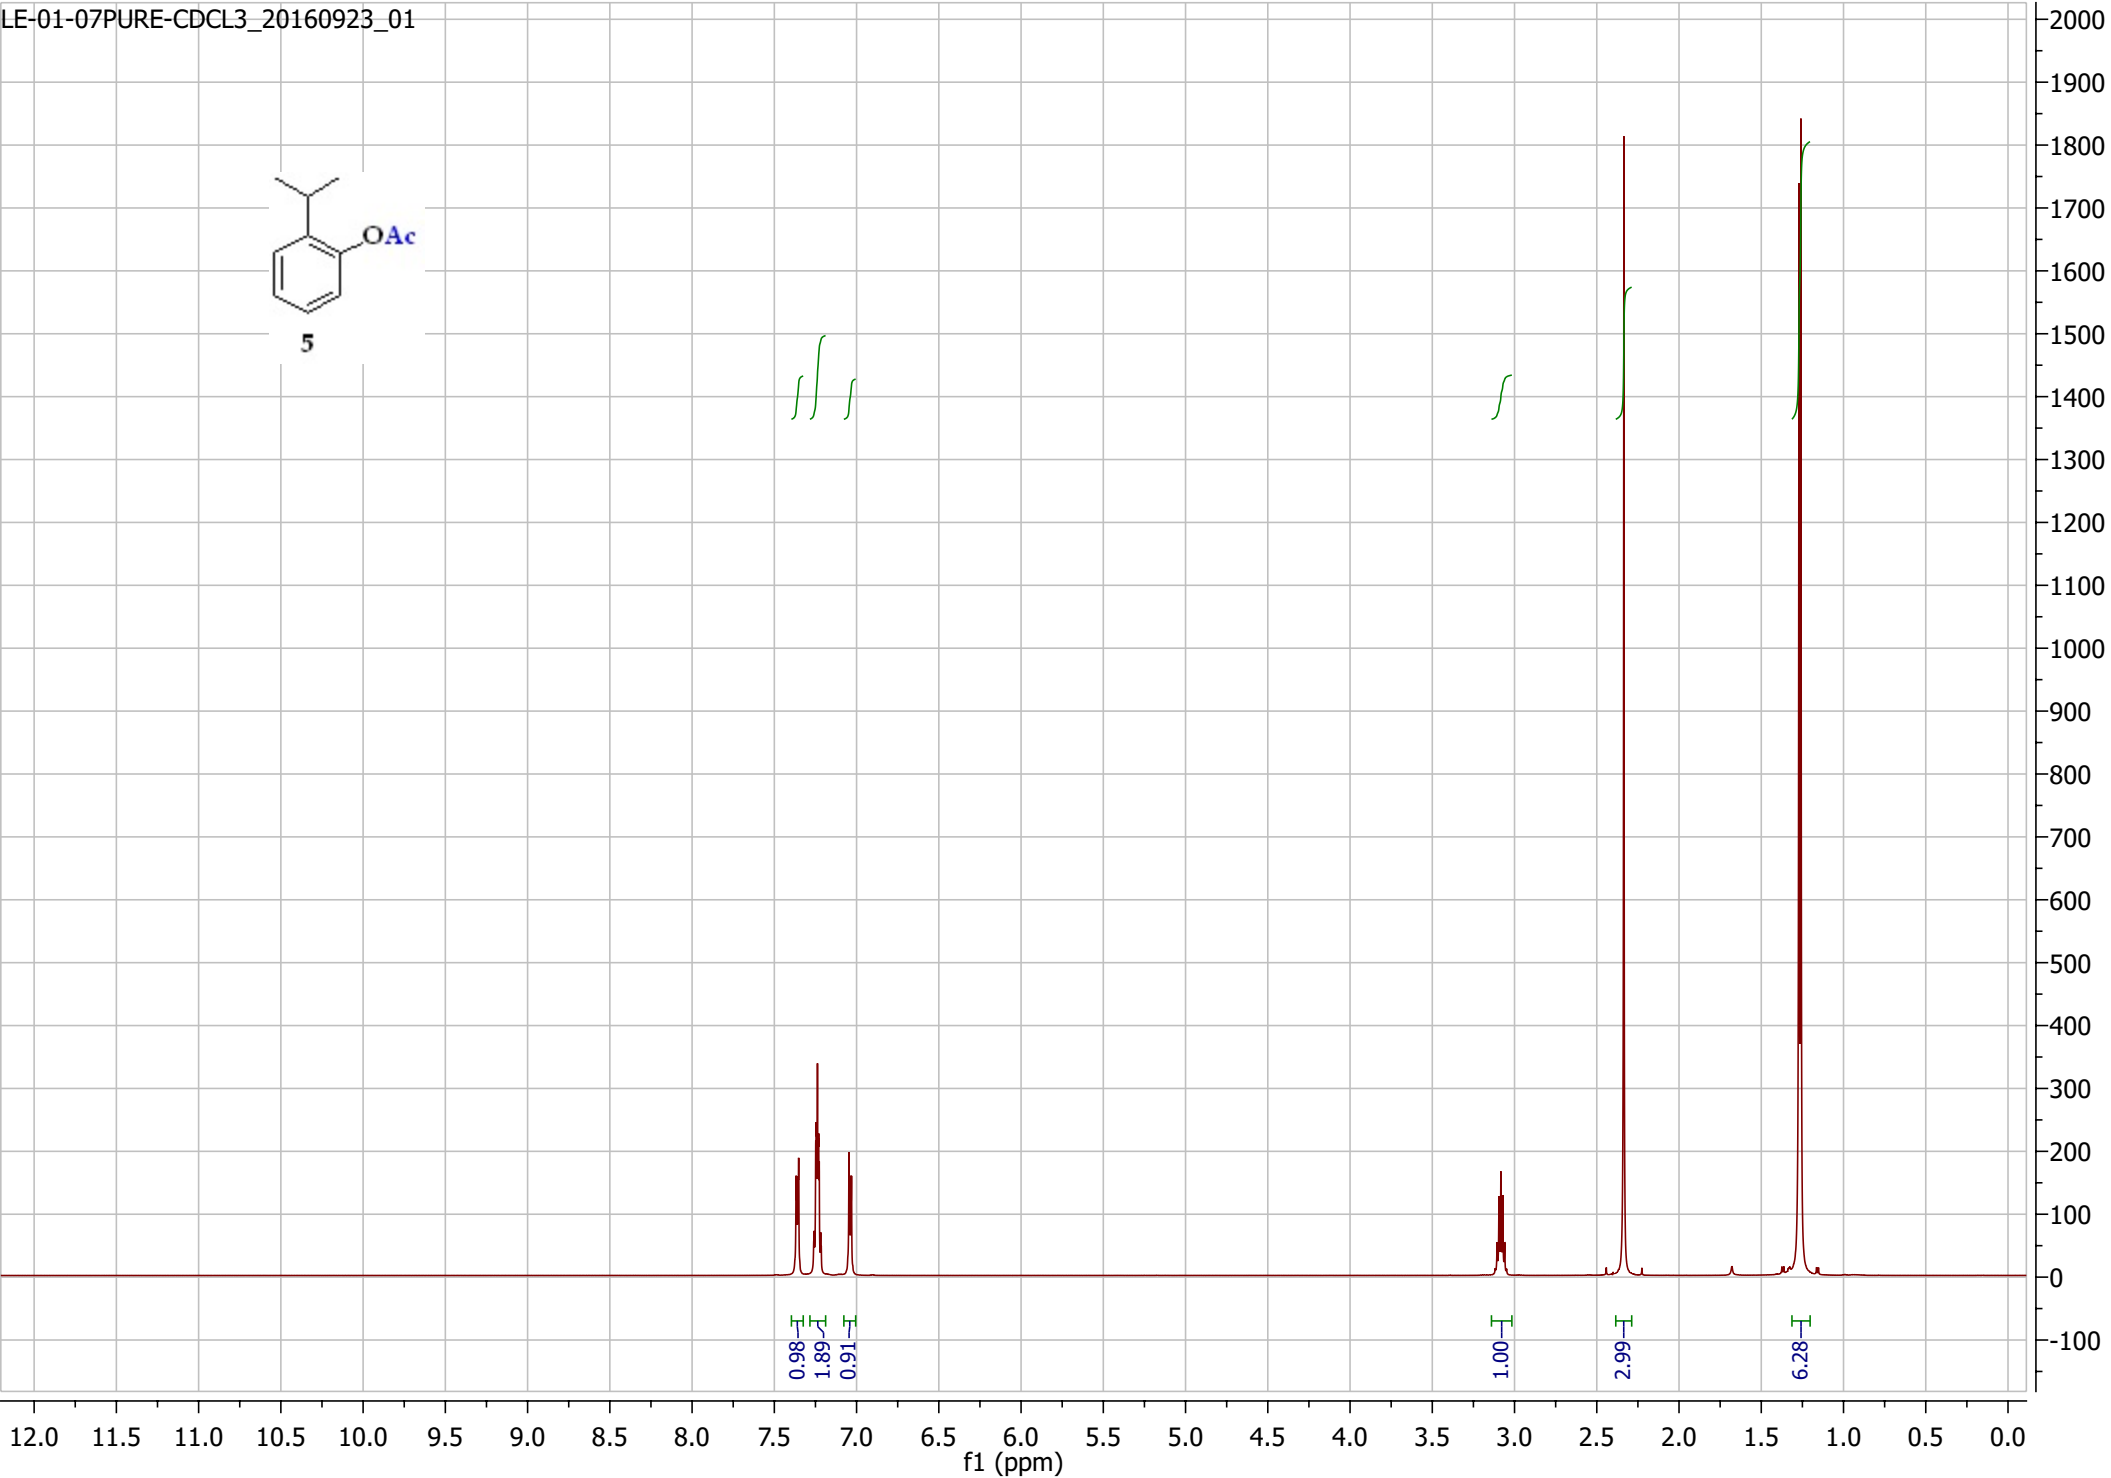

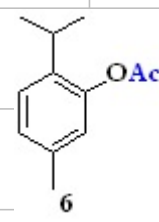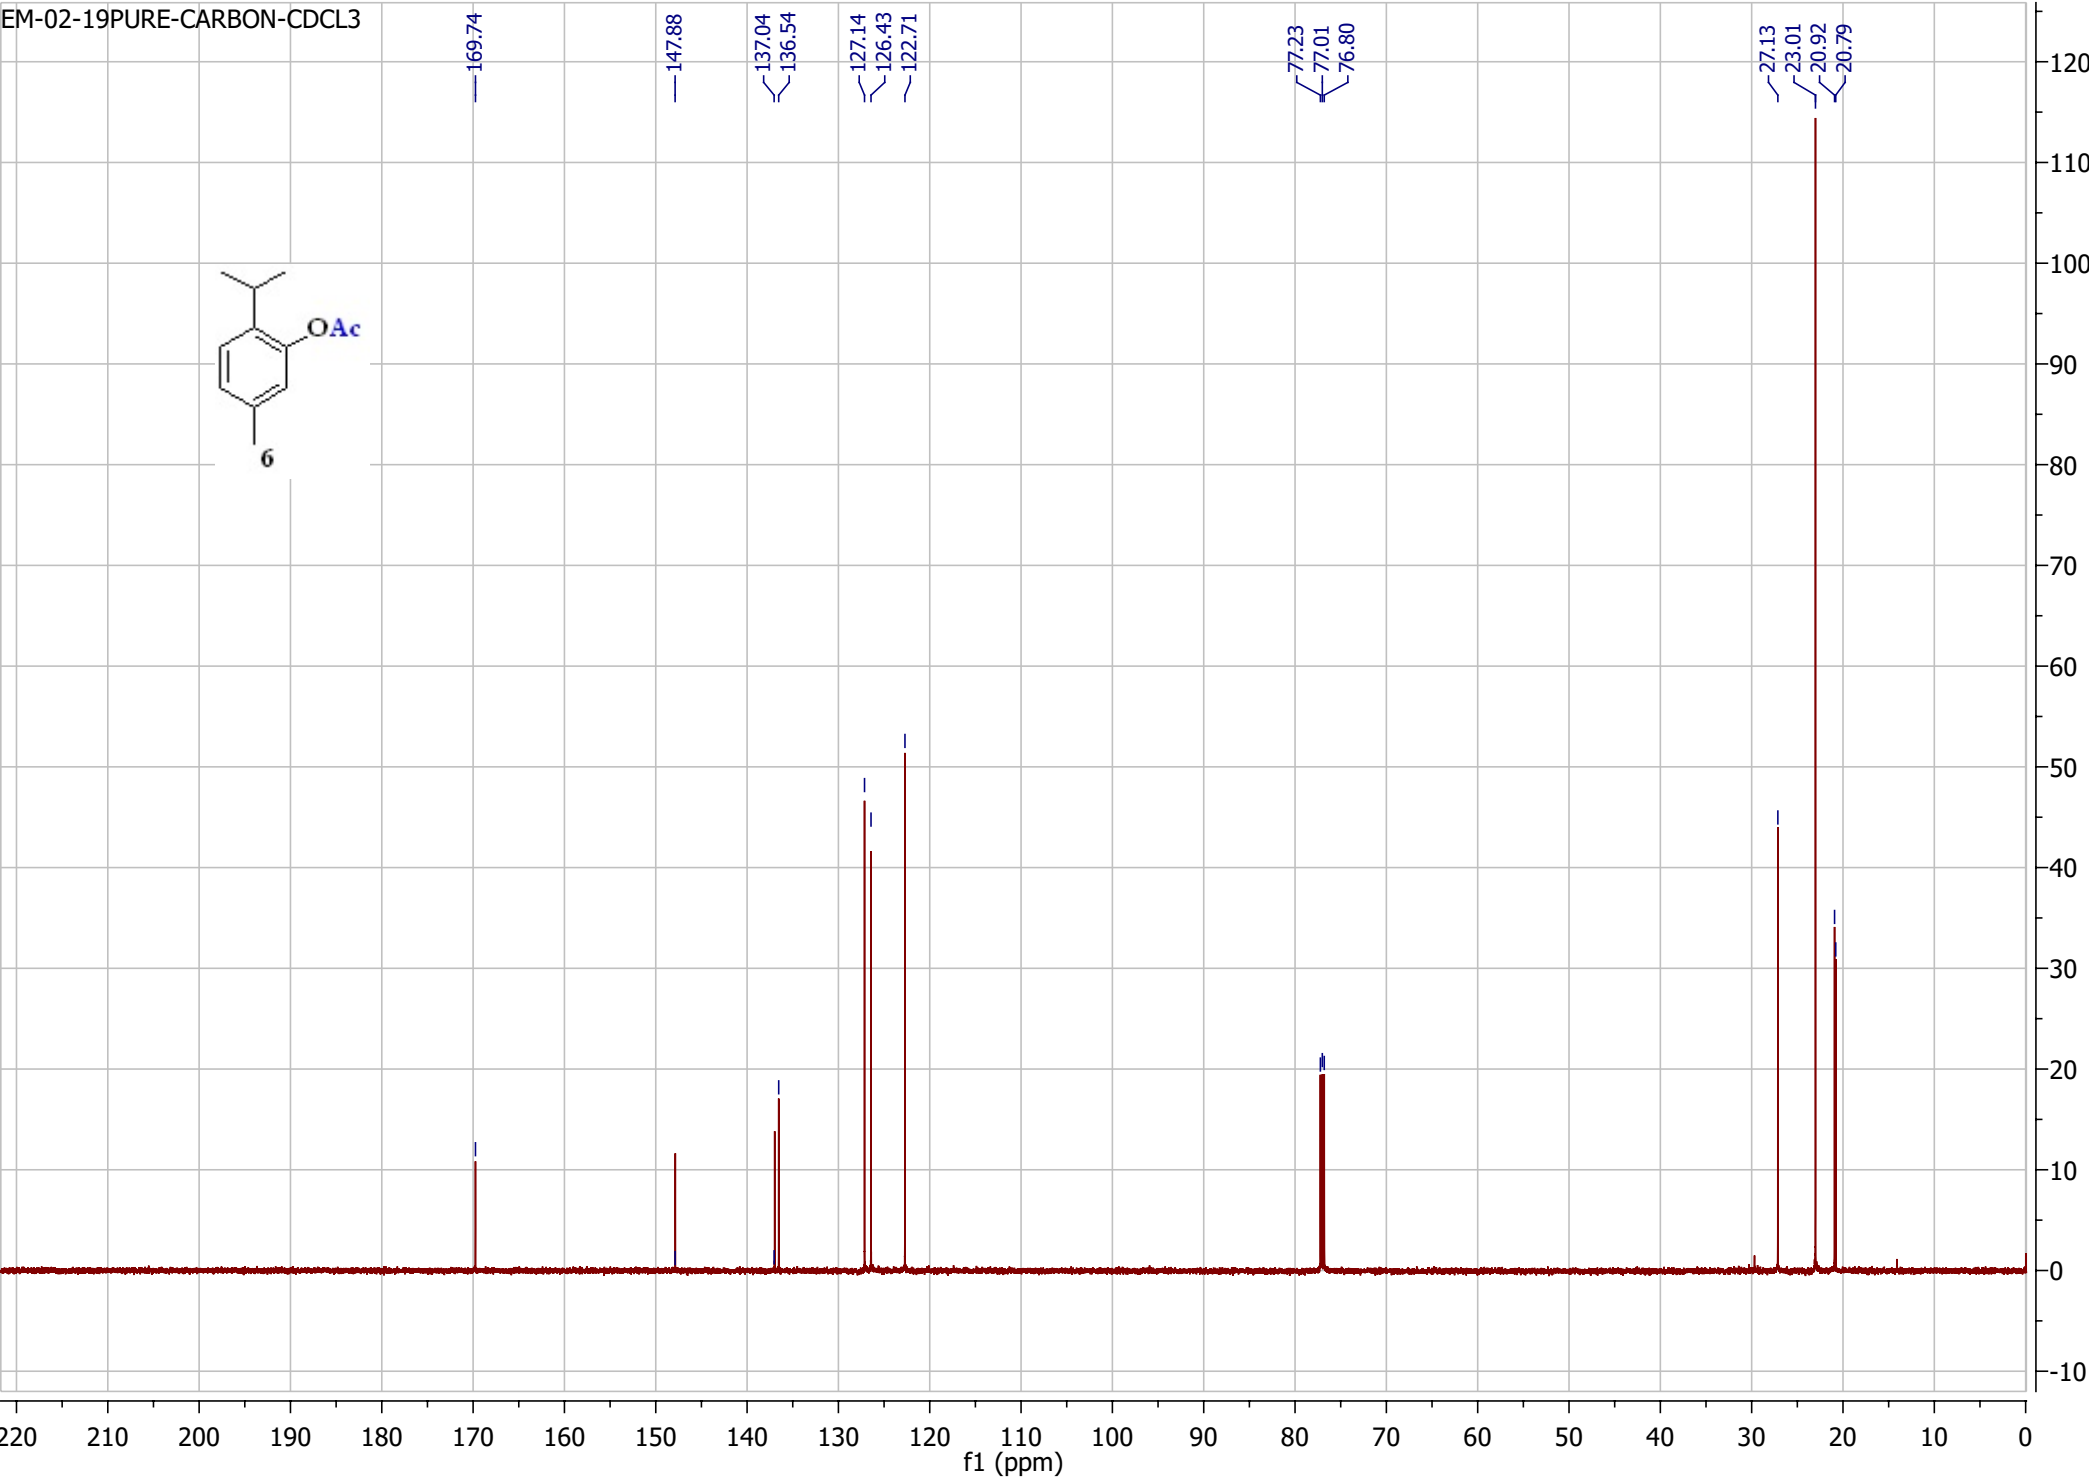

EM-02-19PURE-CDCL3

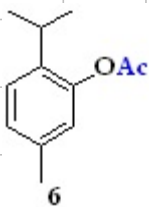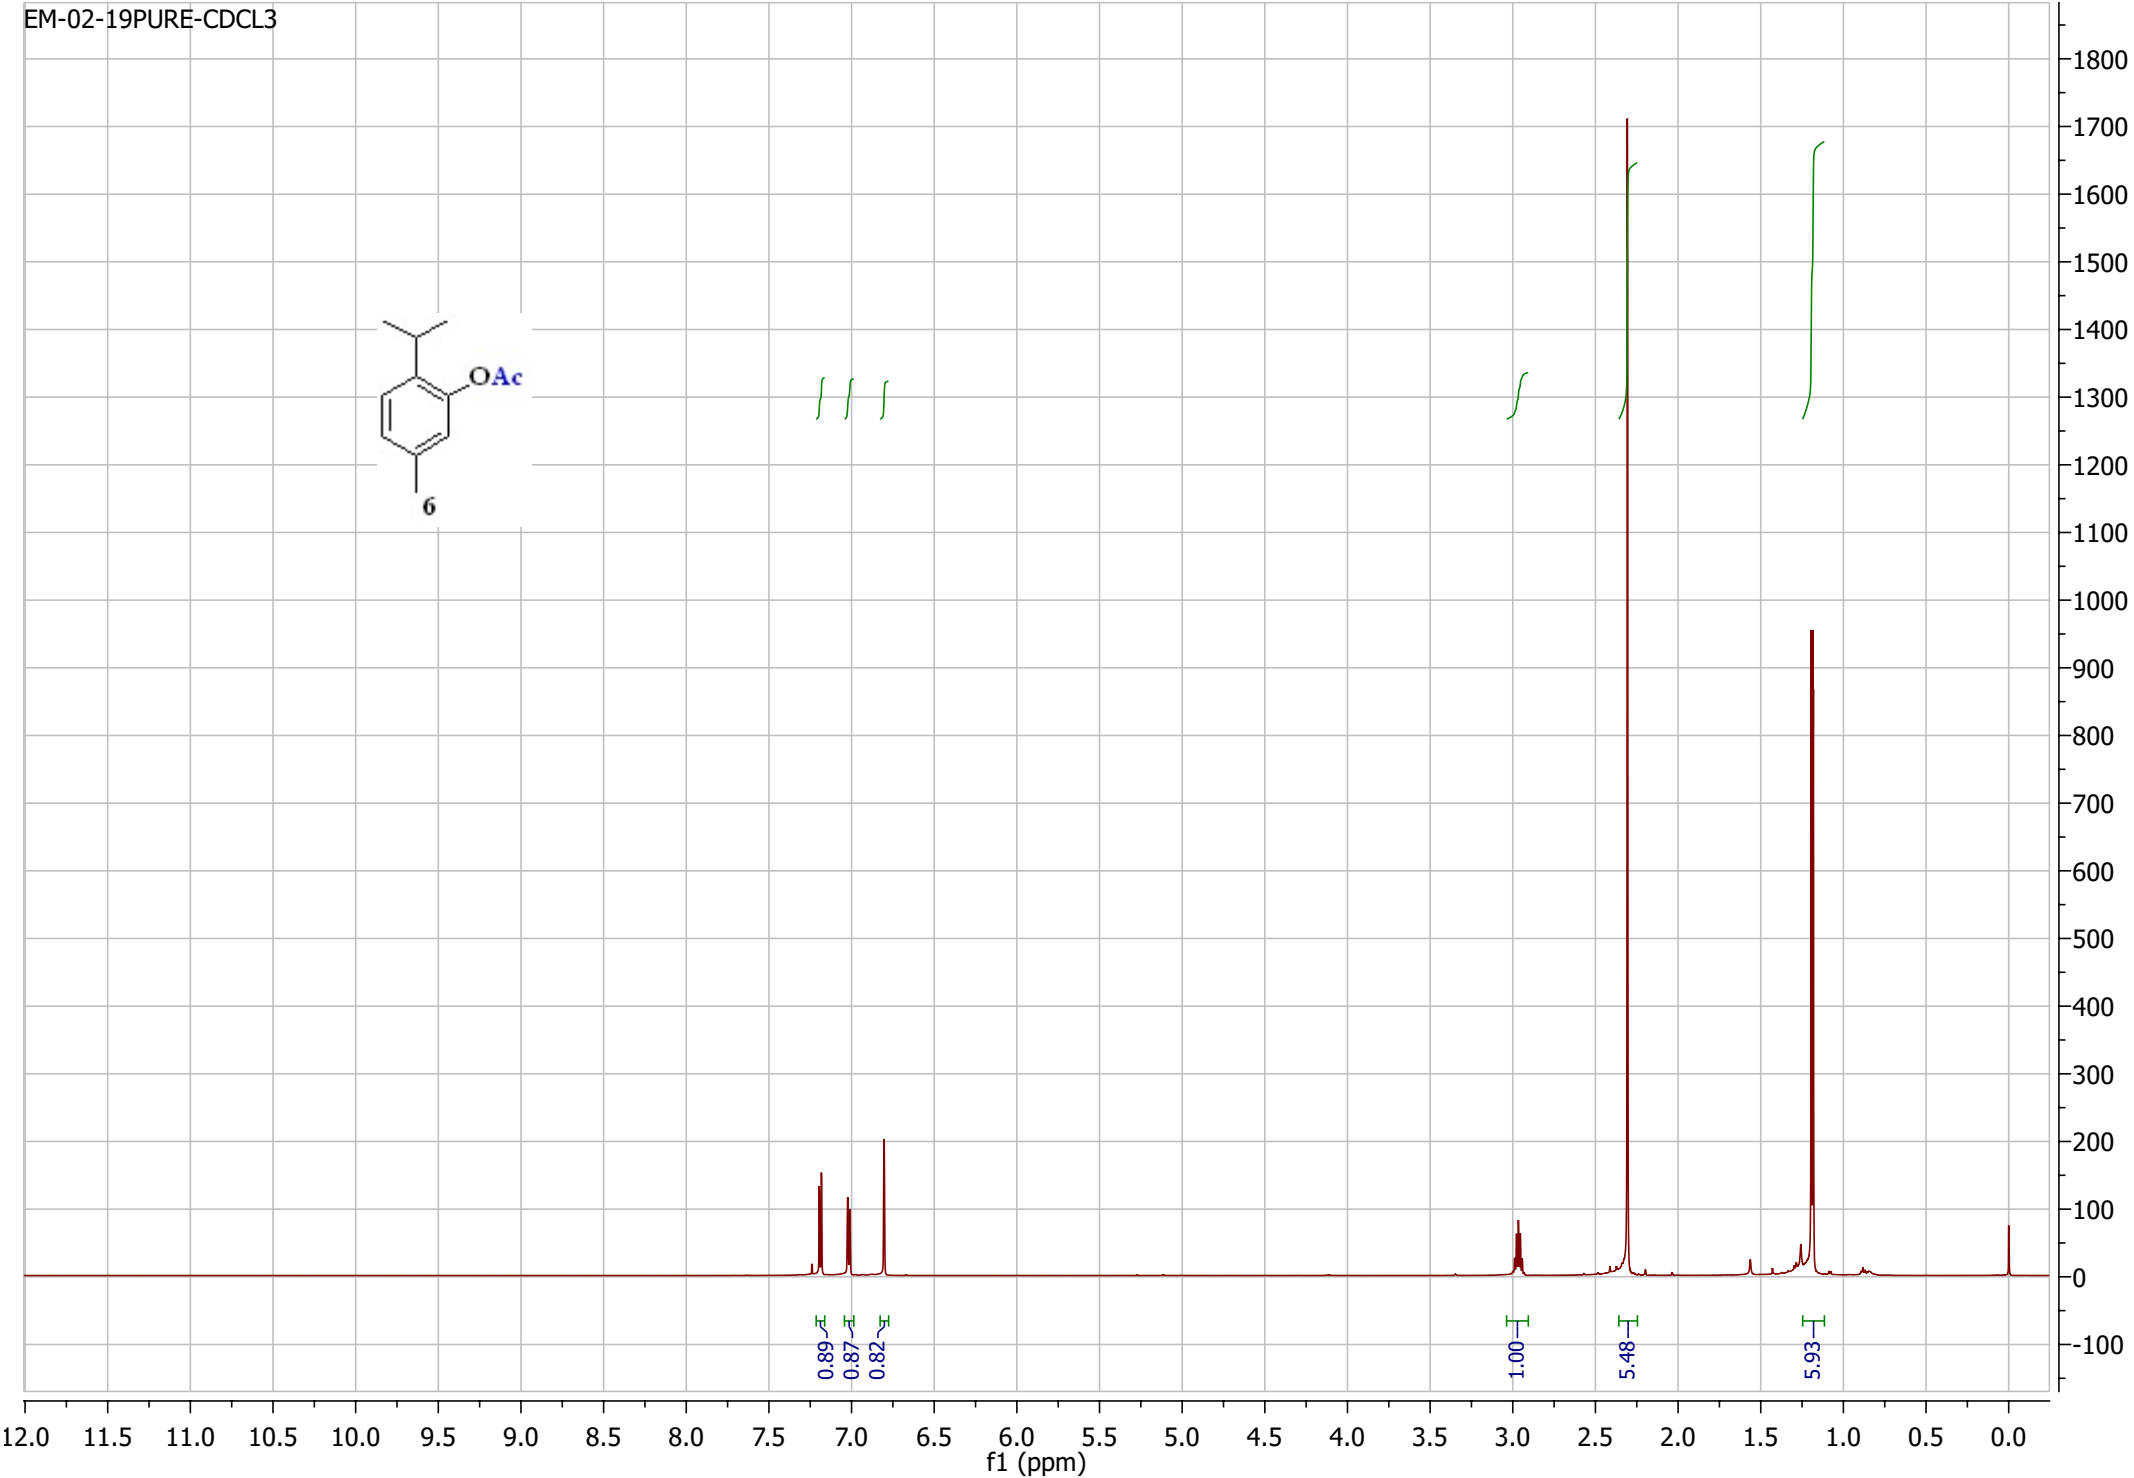

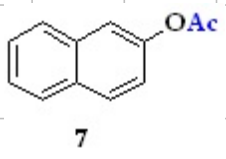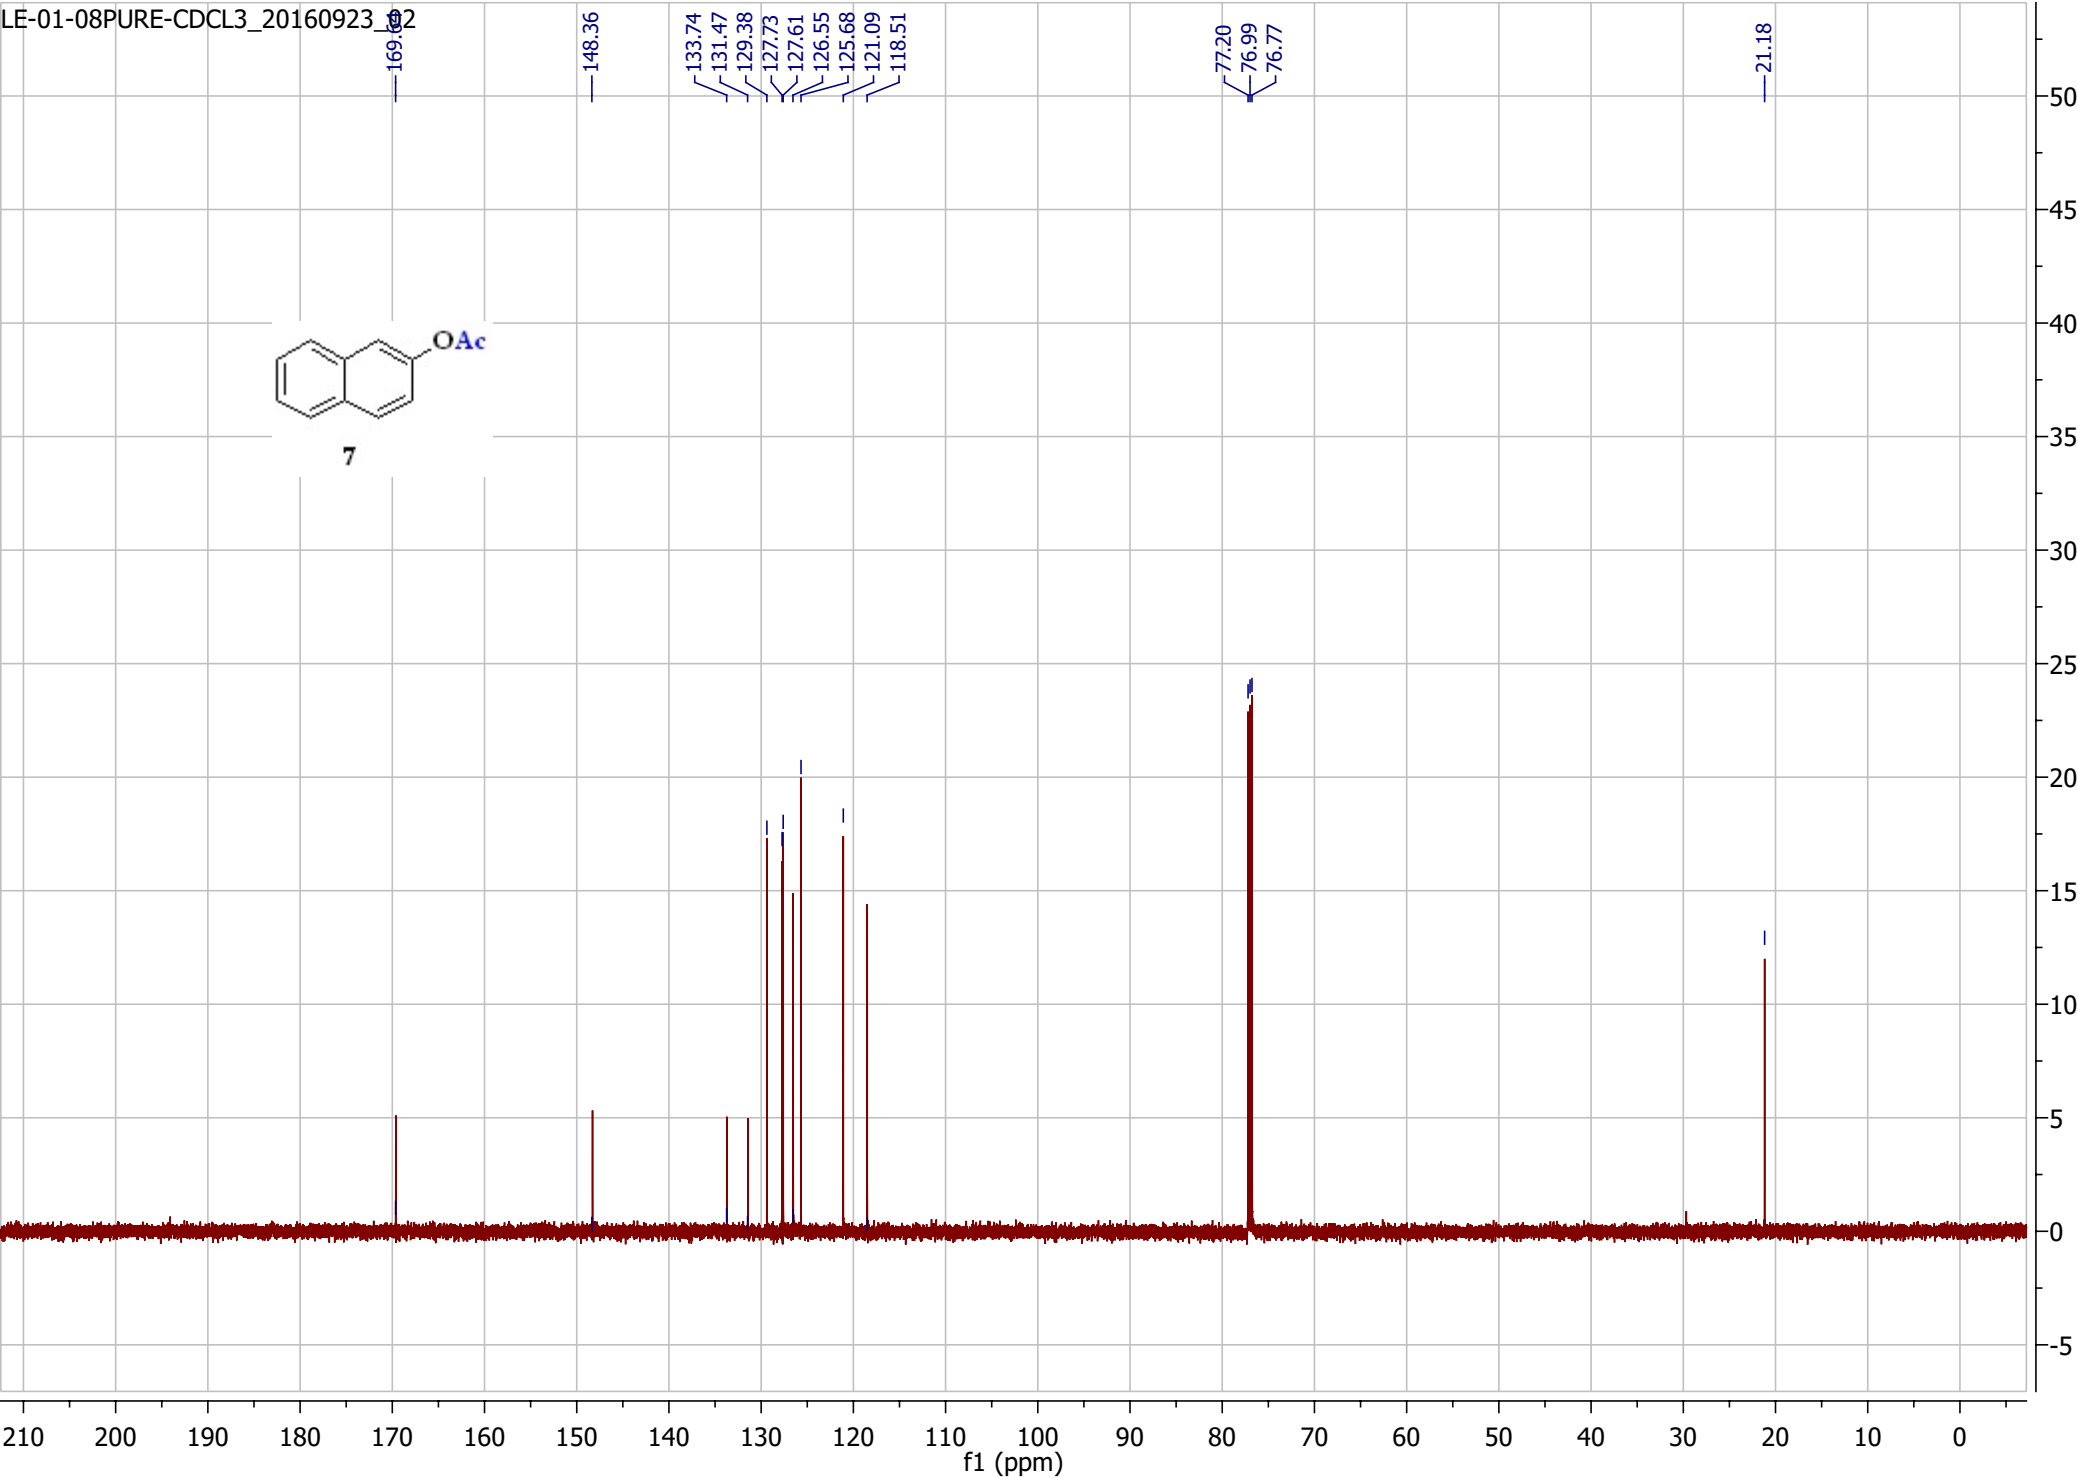

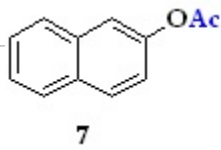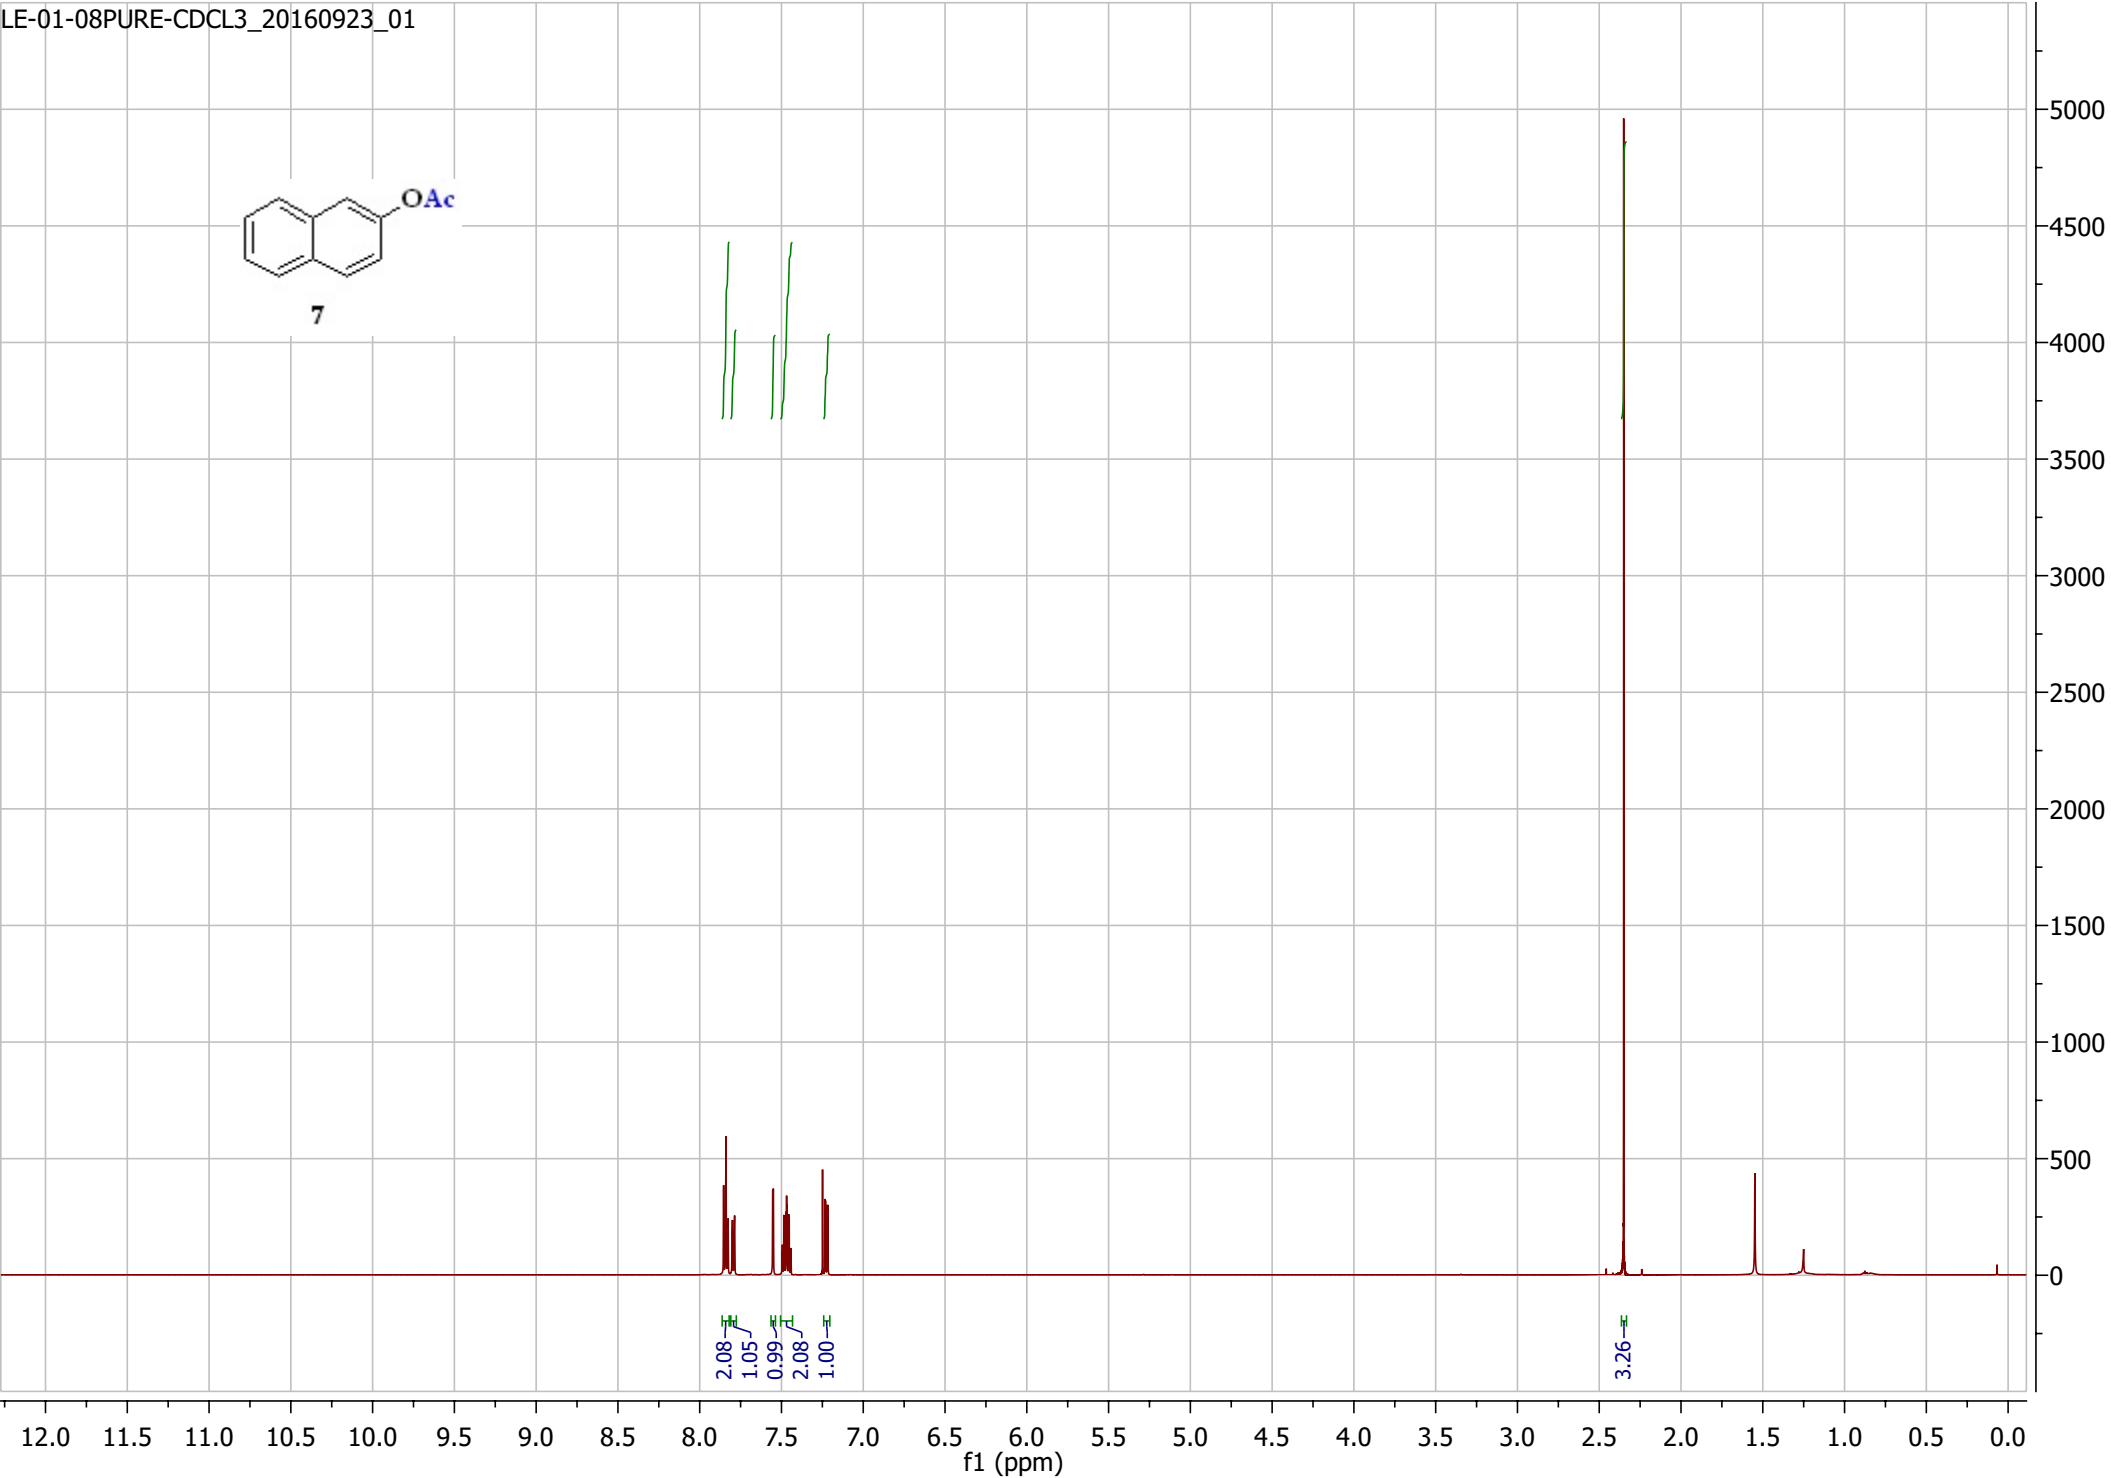



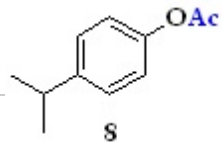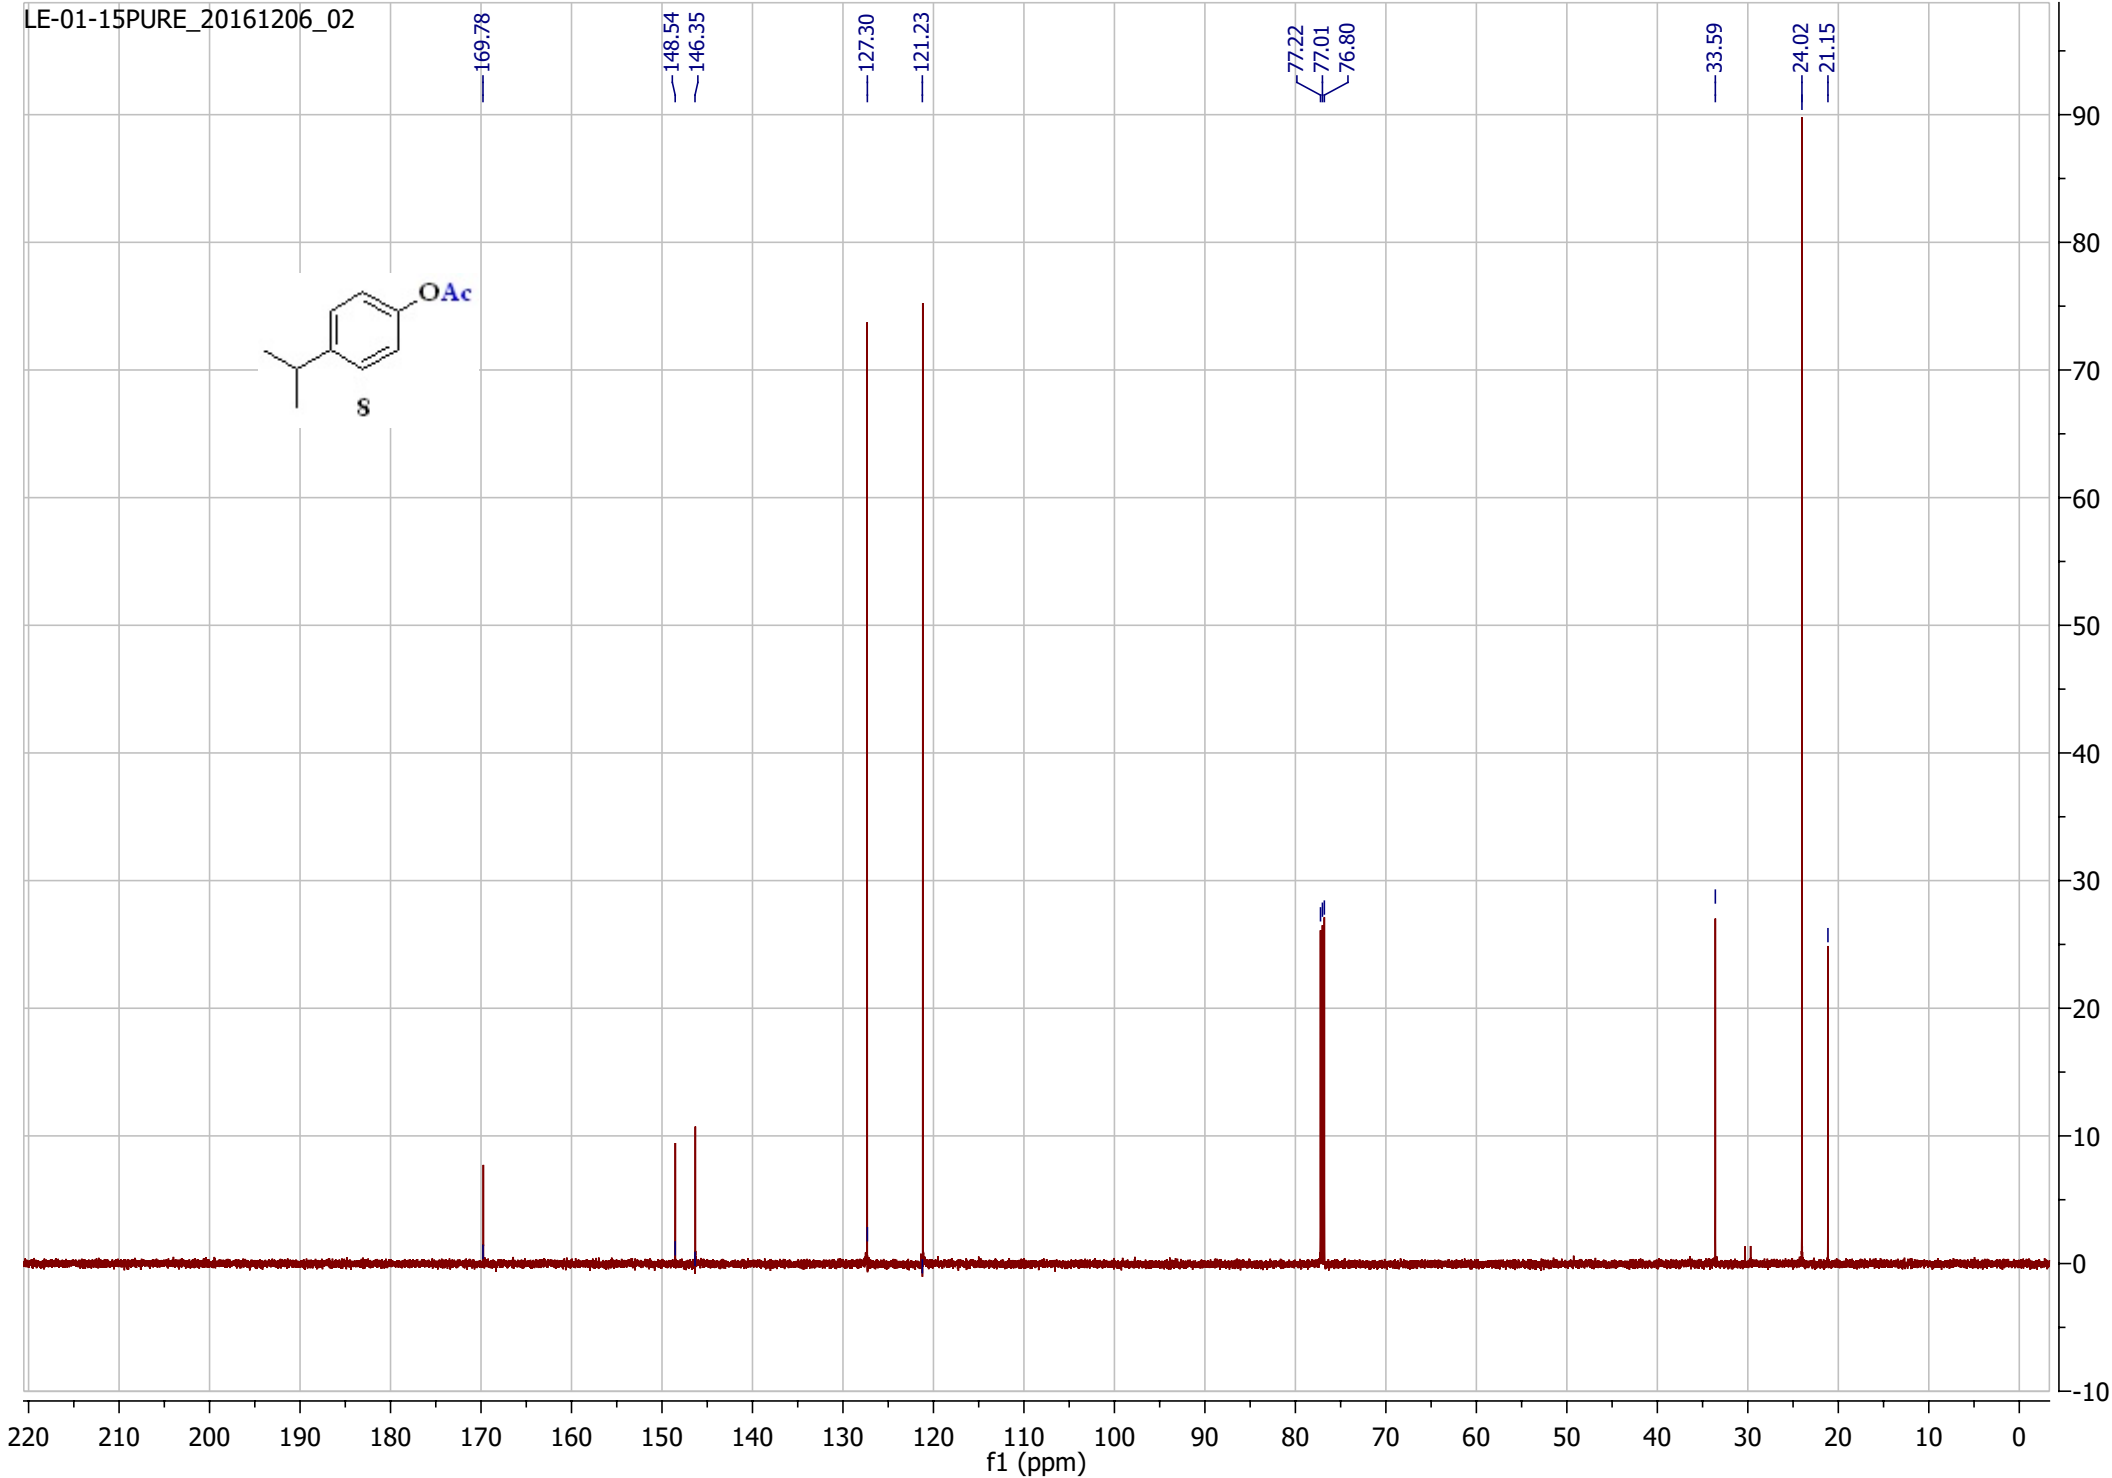

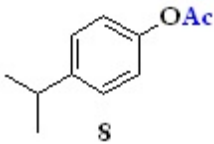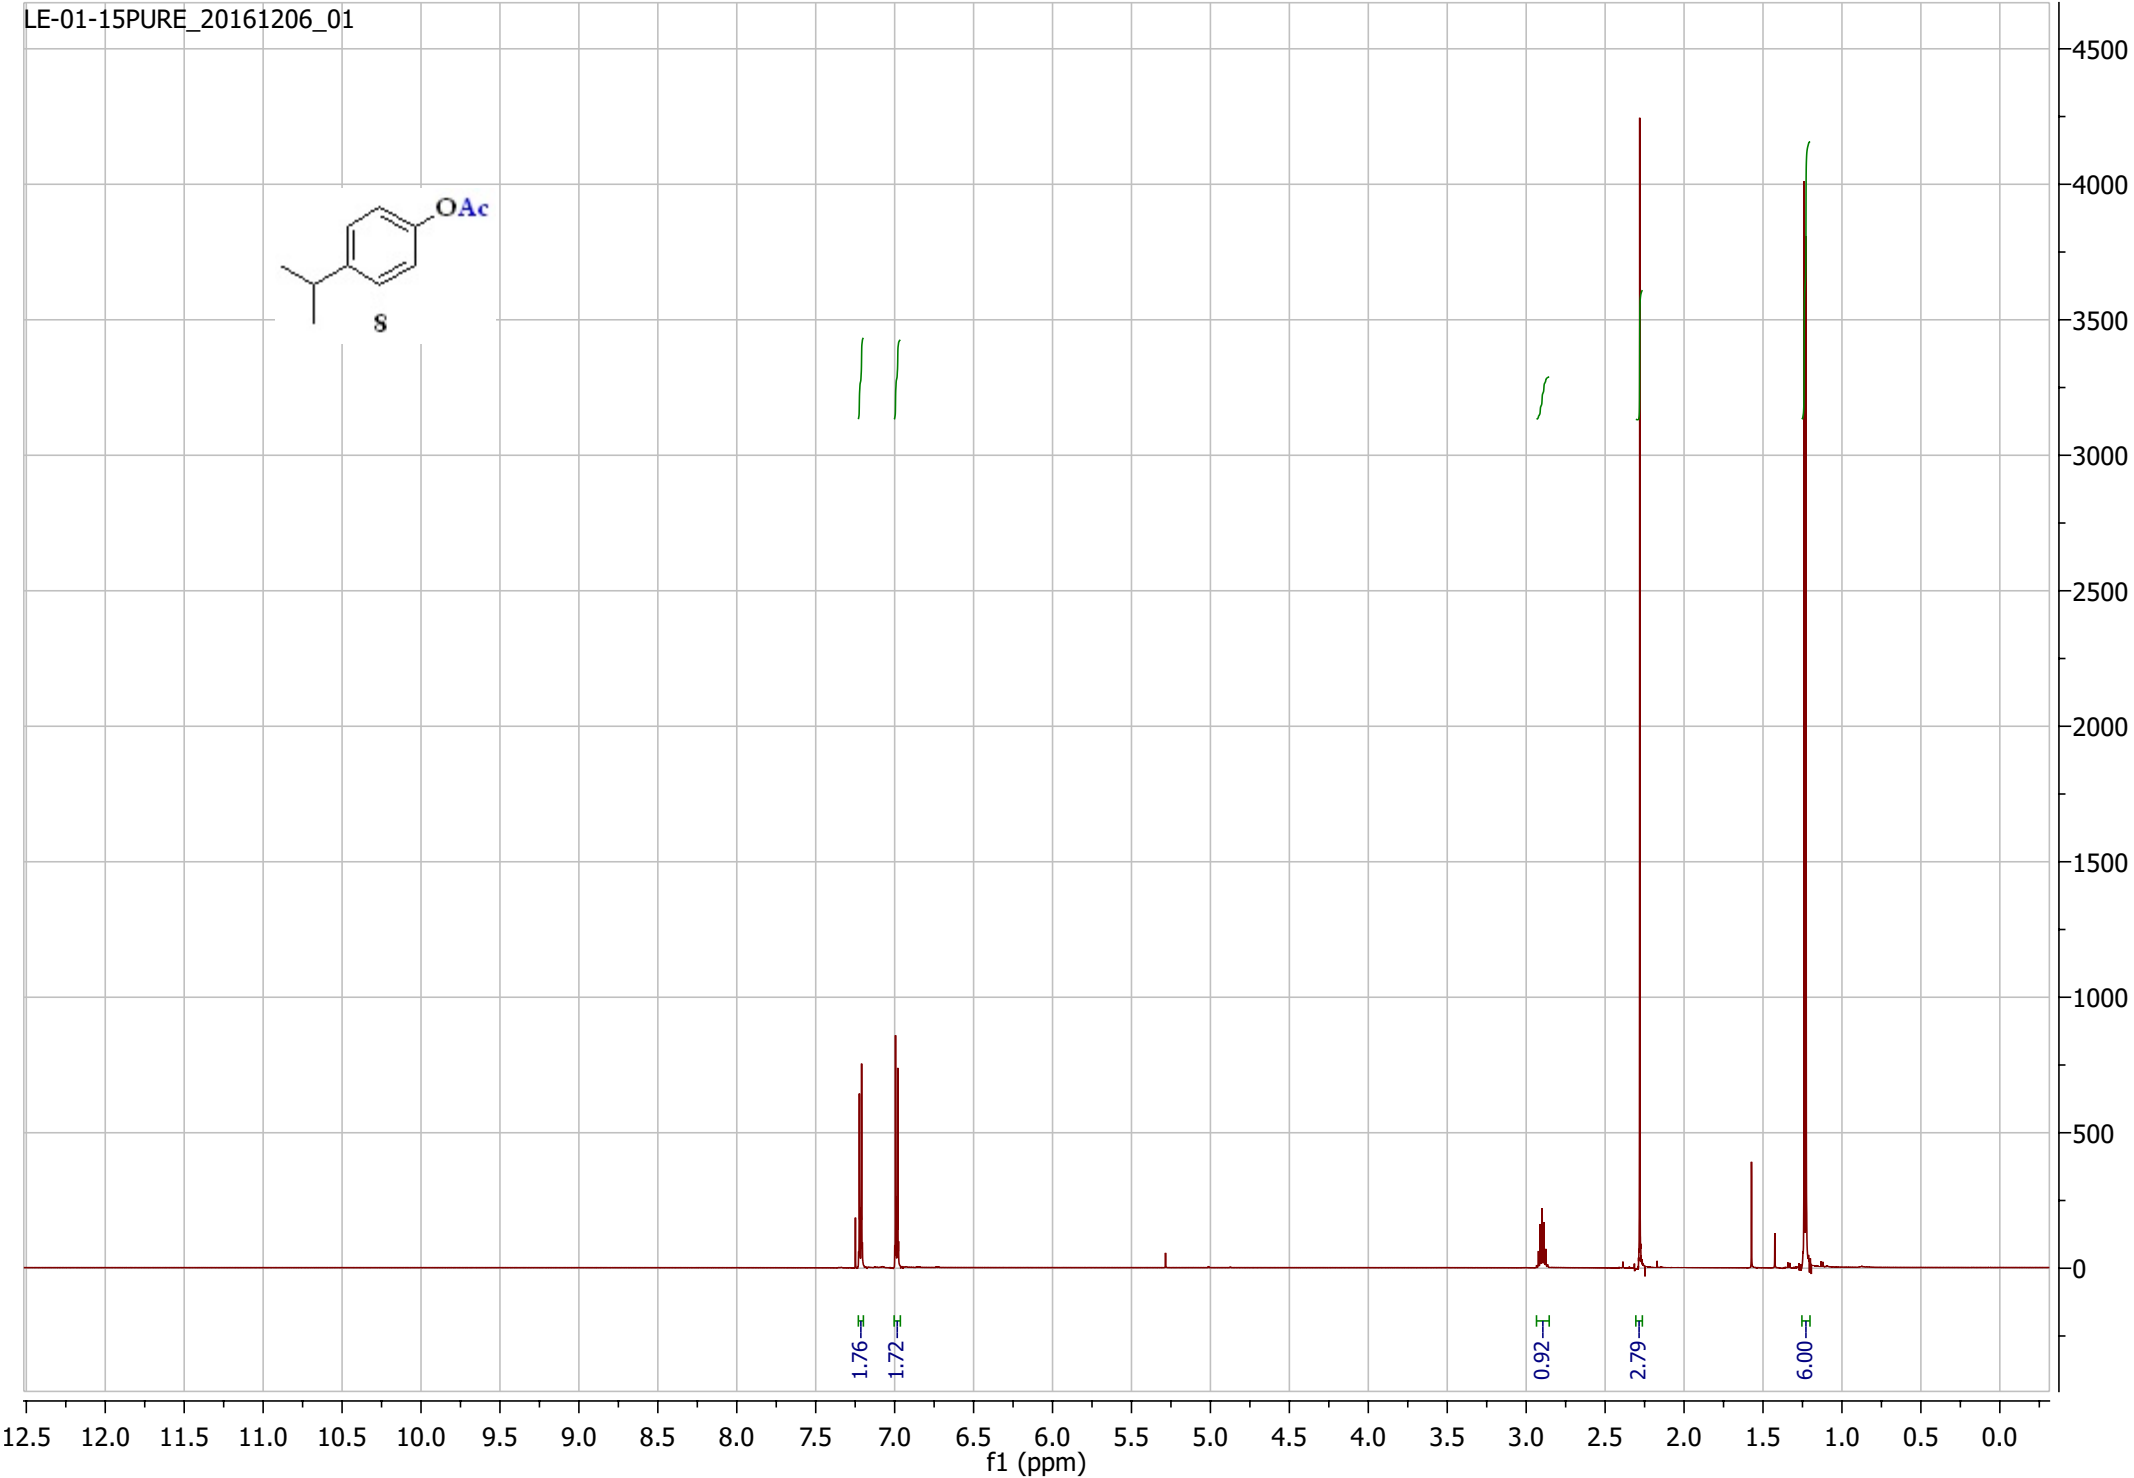

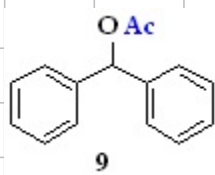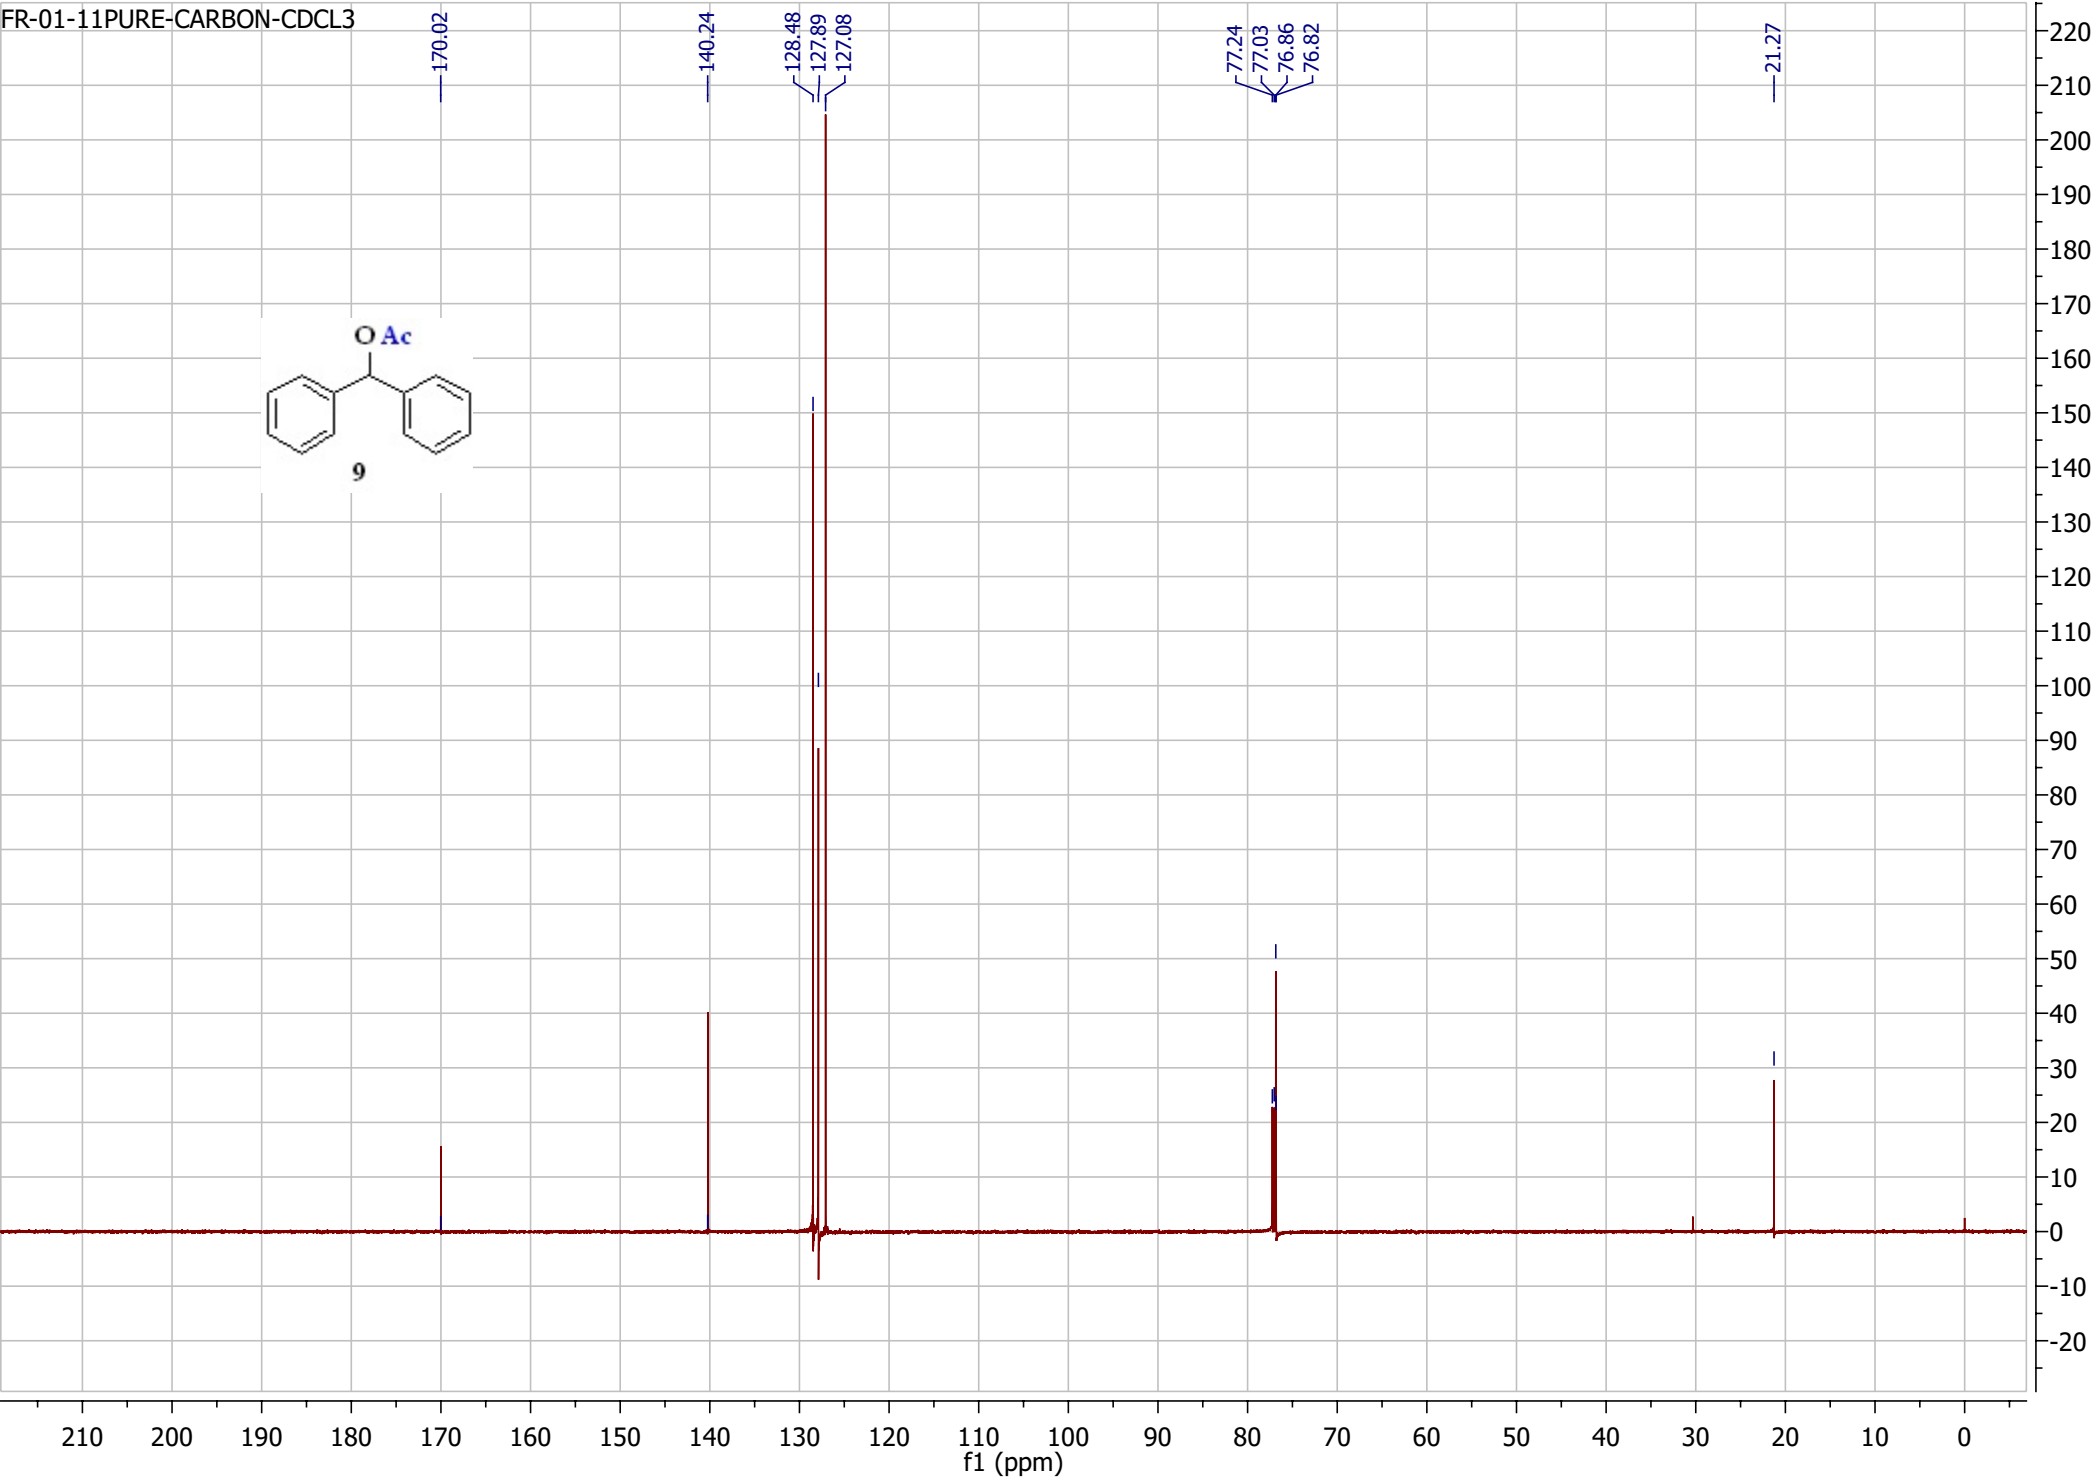

FR-01-11PURE-CDCL3

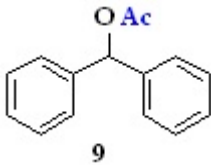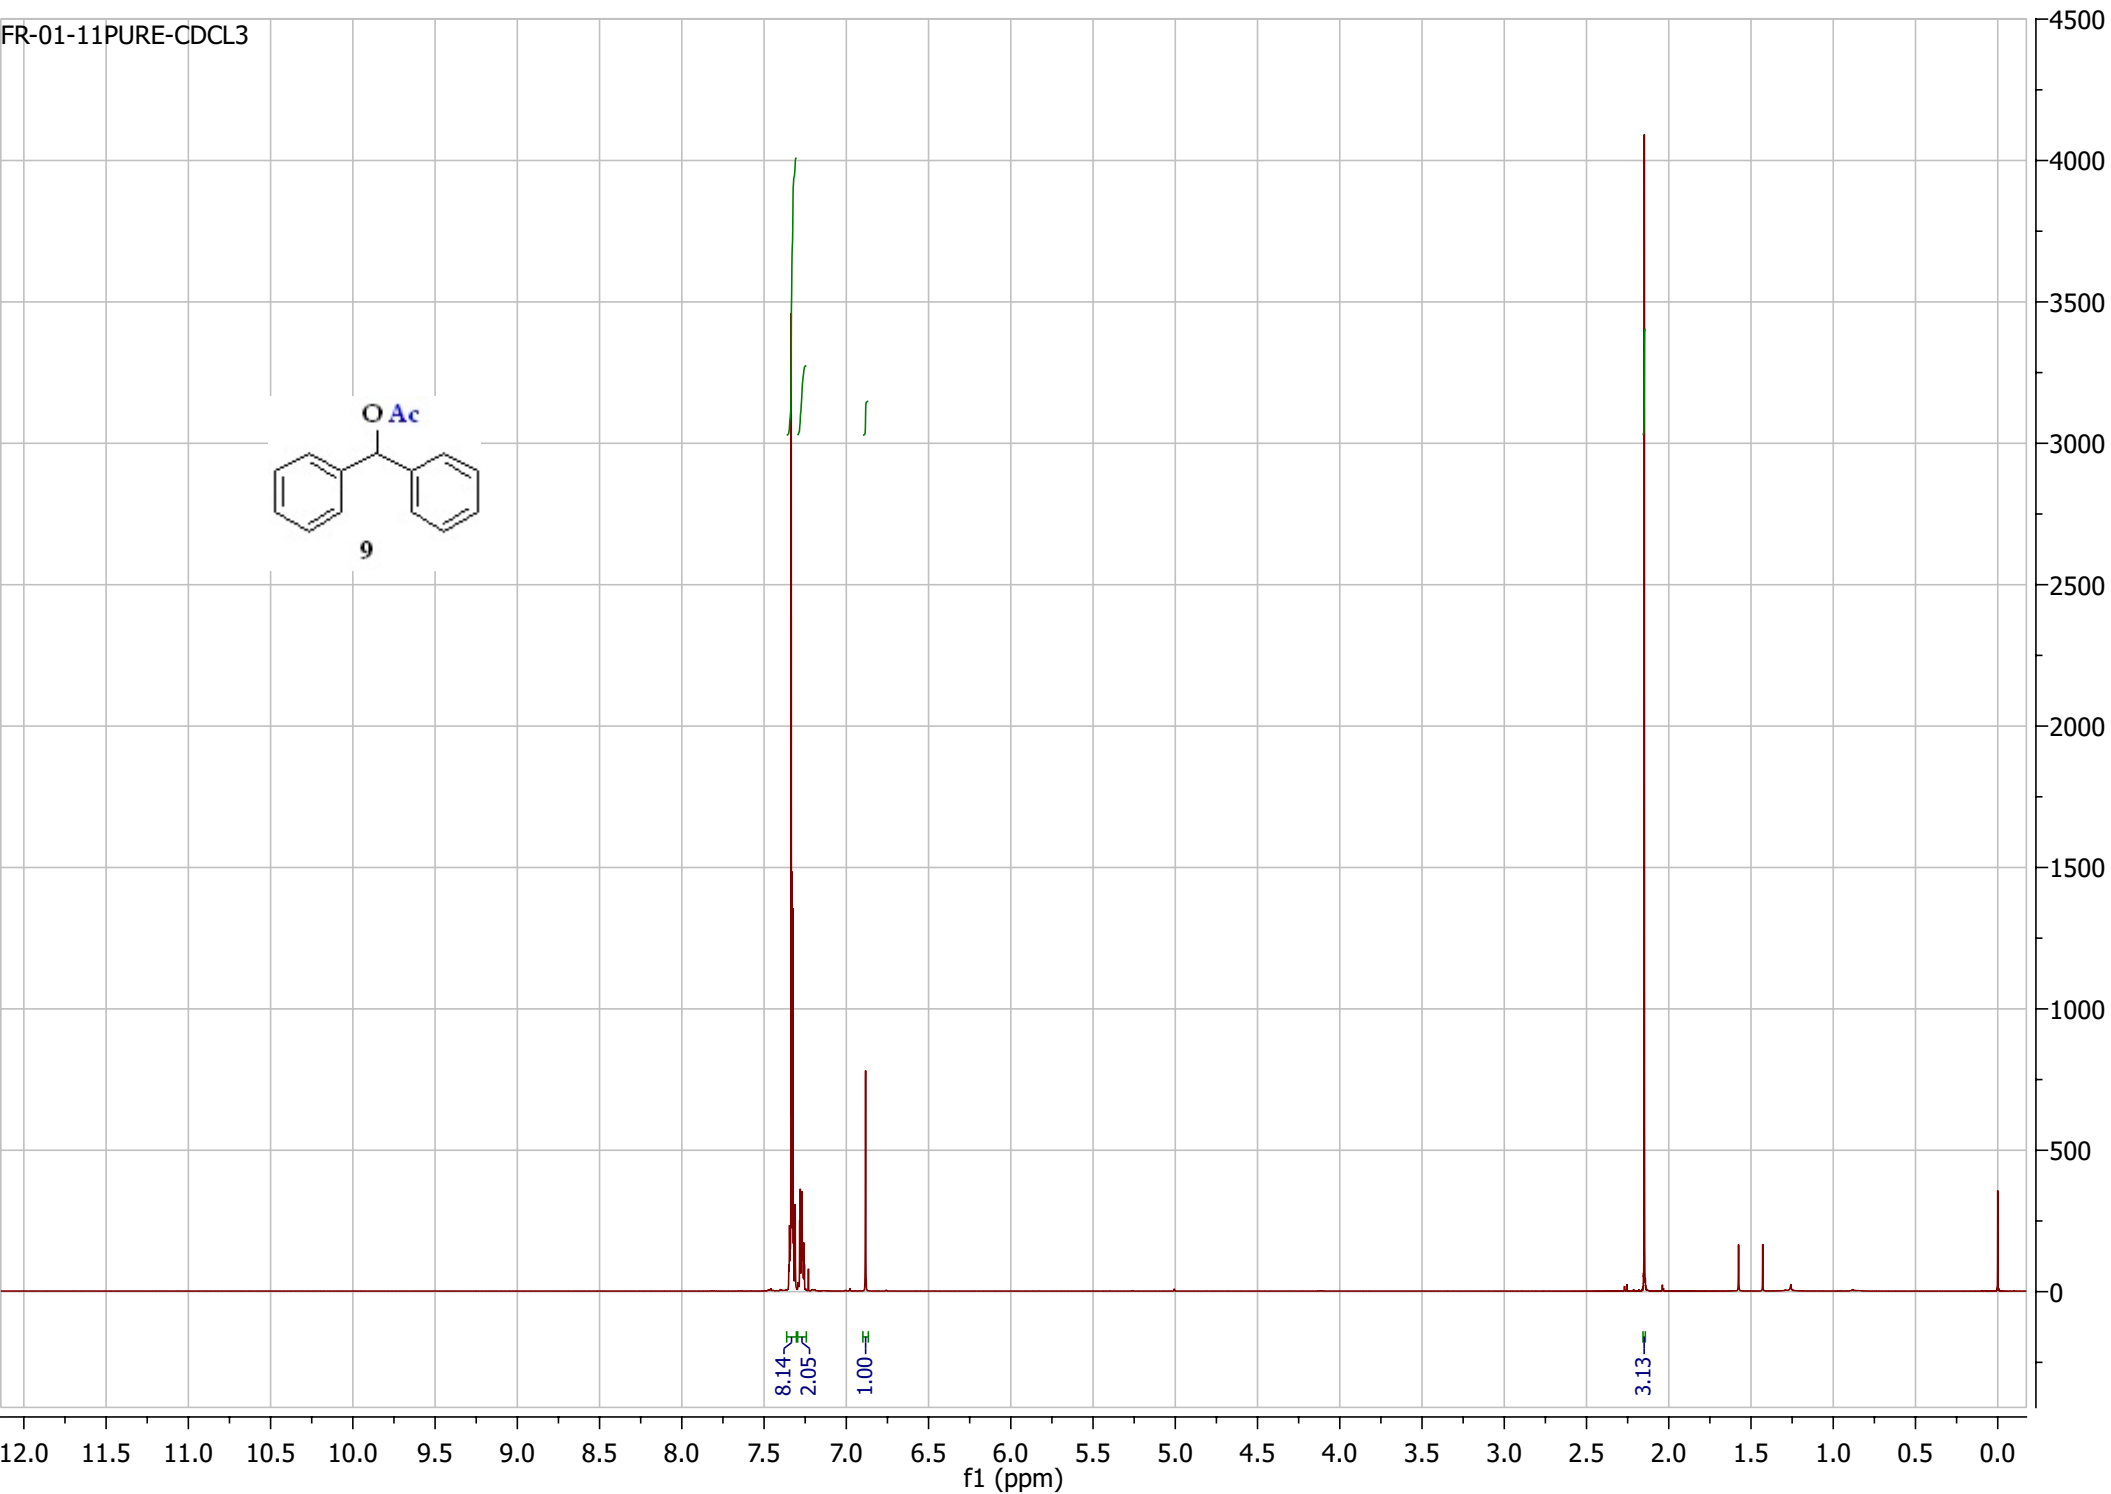

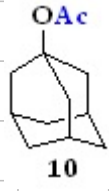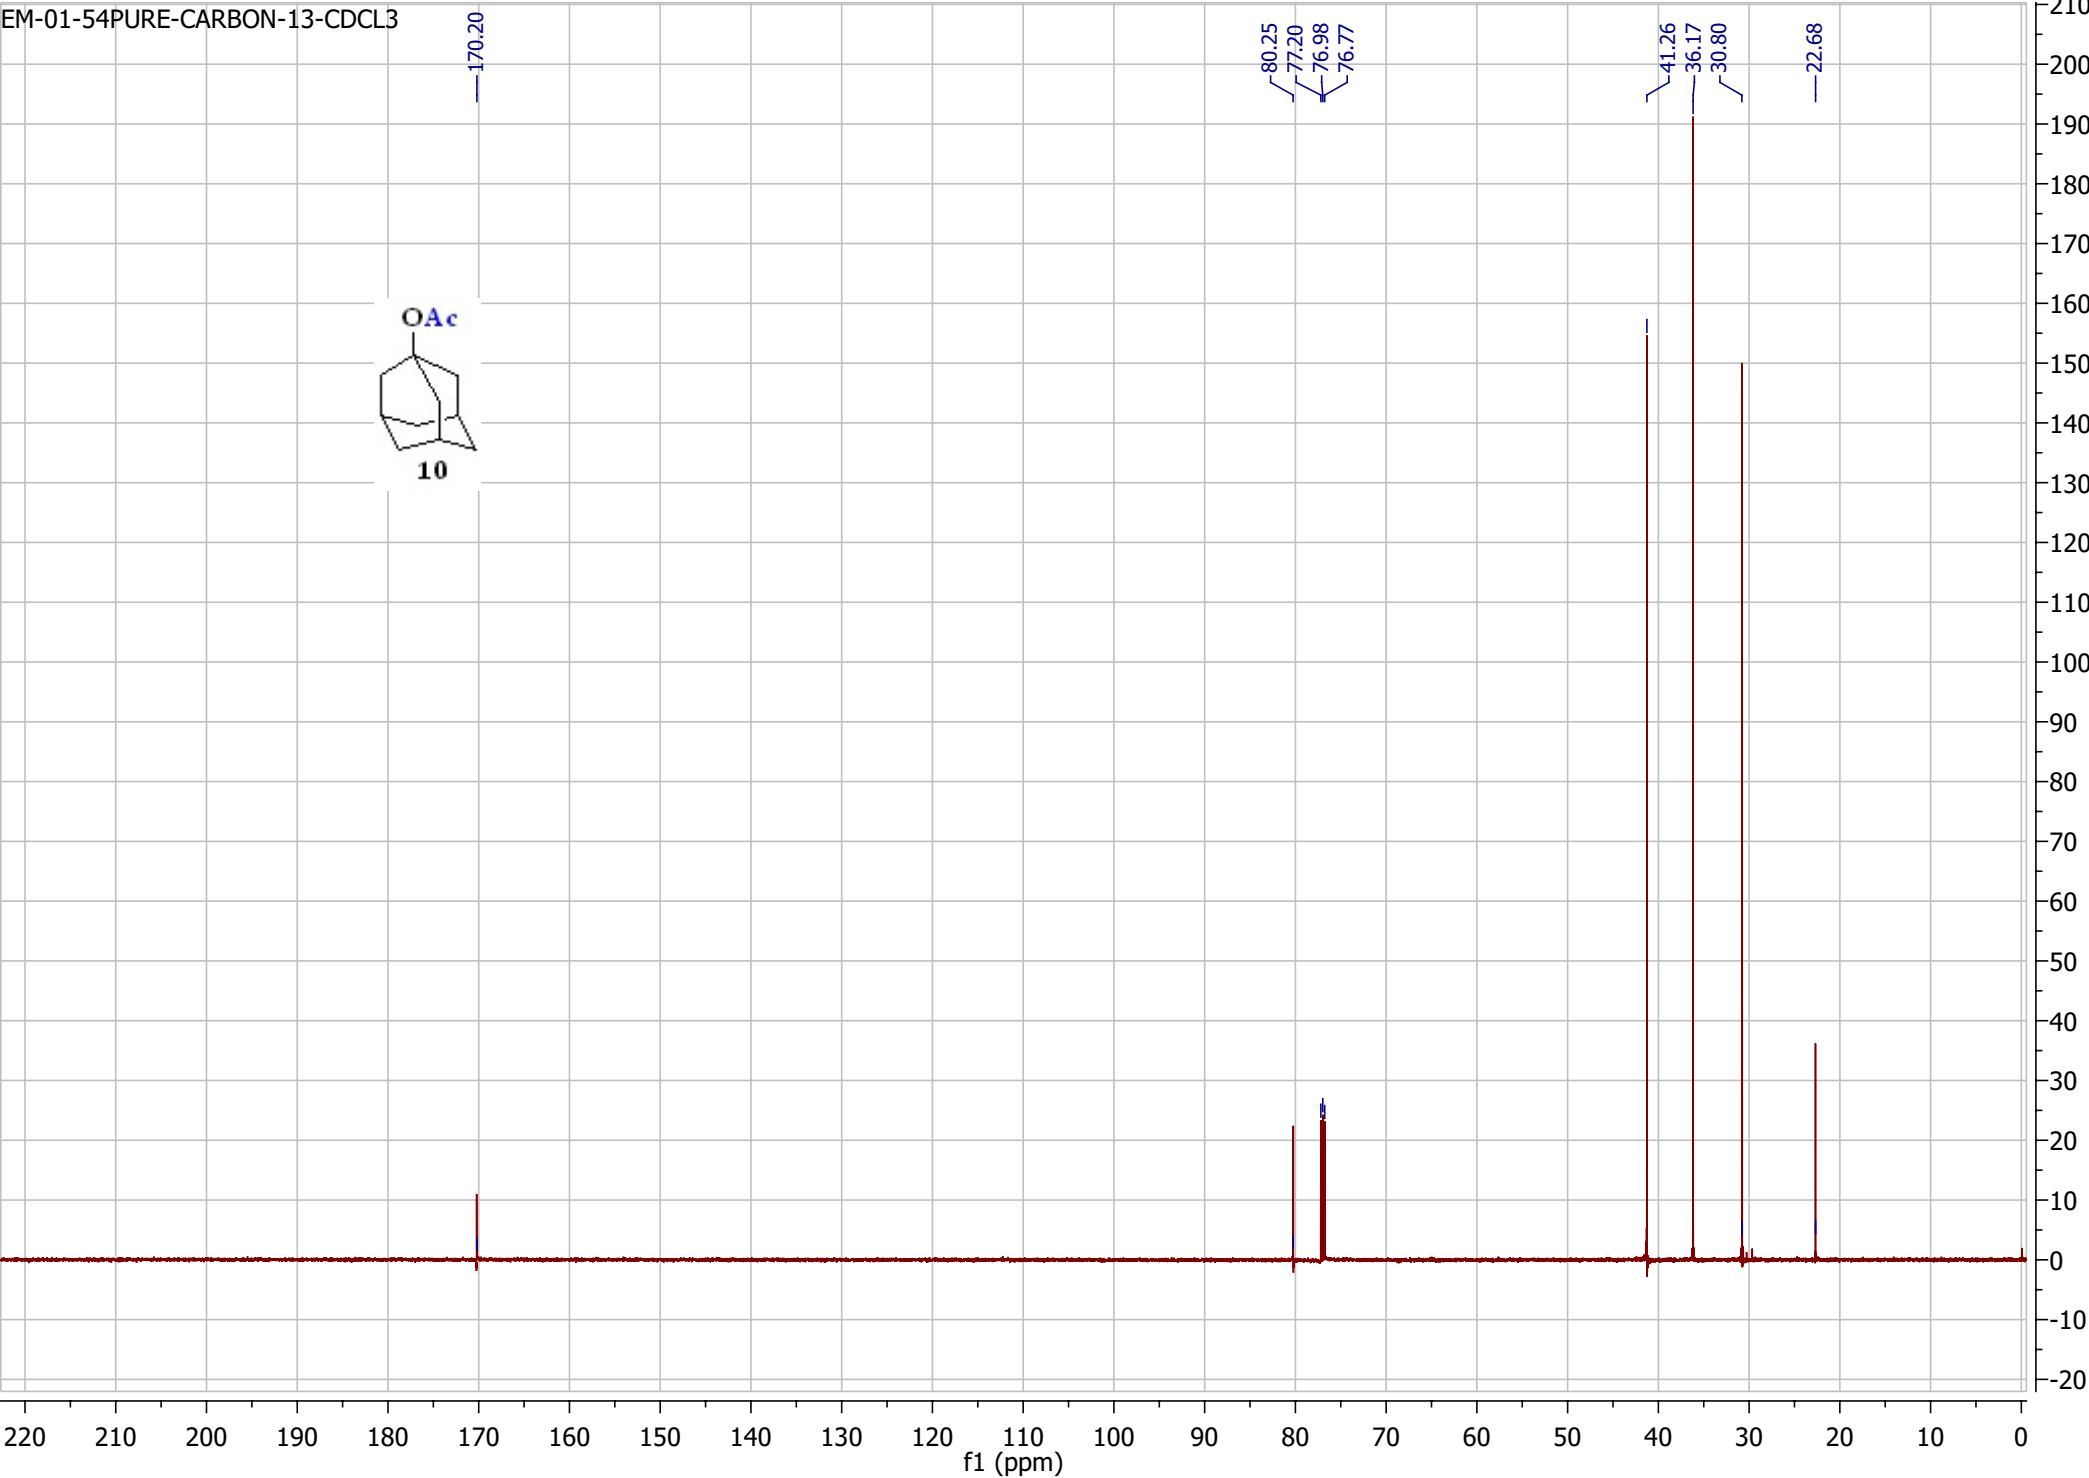

EM-01-54PURE-CDCL3

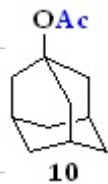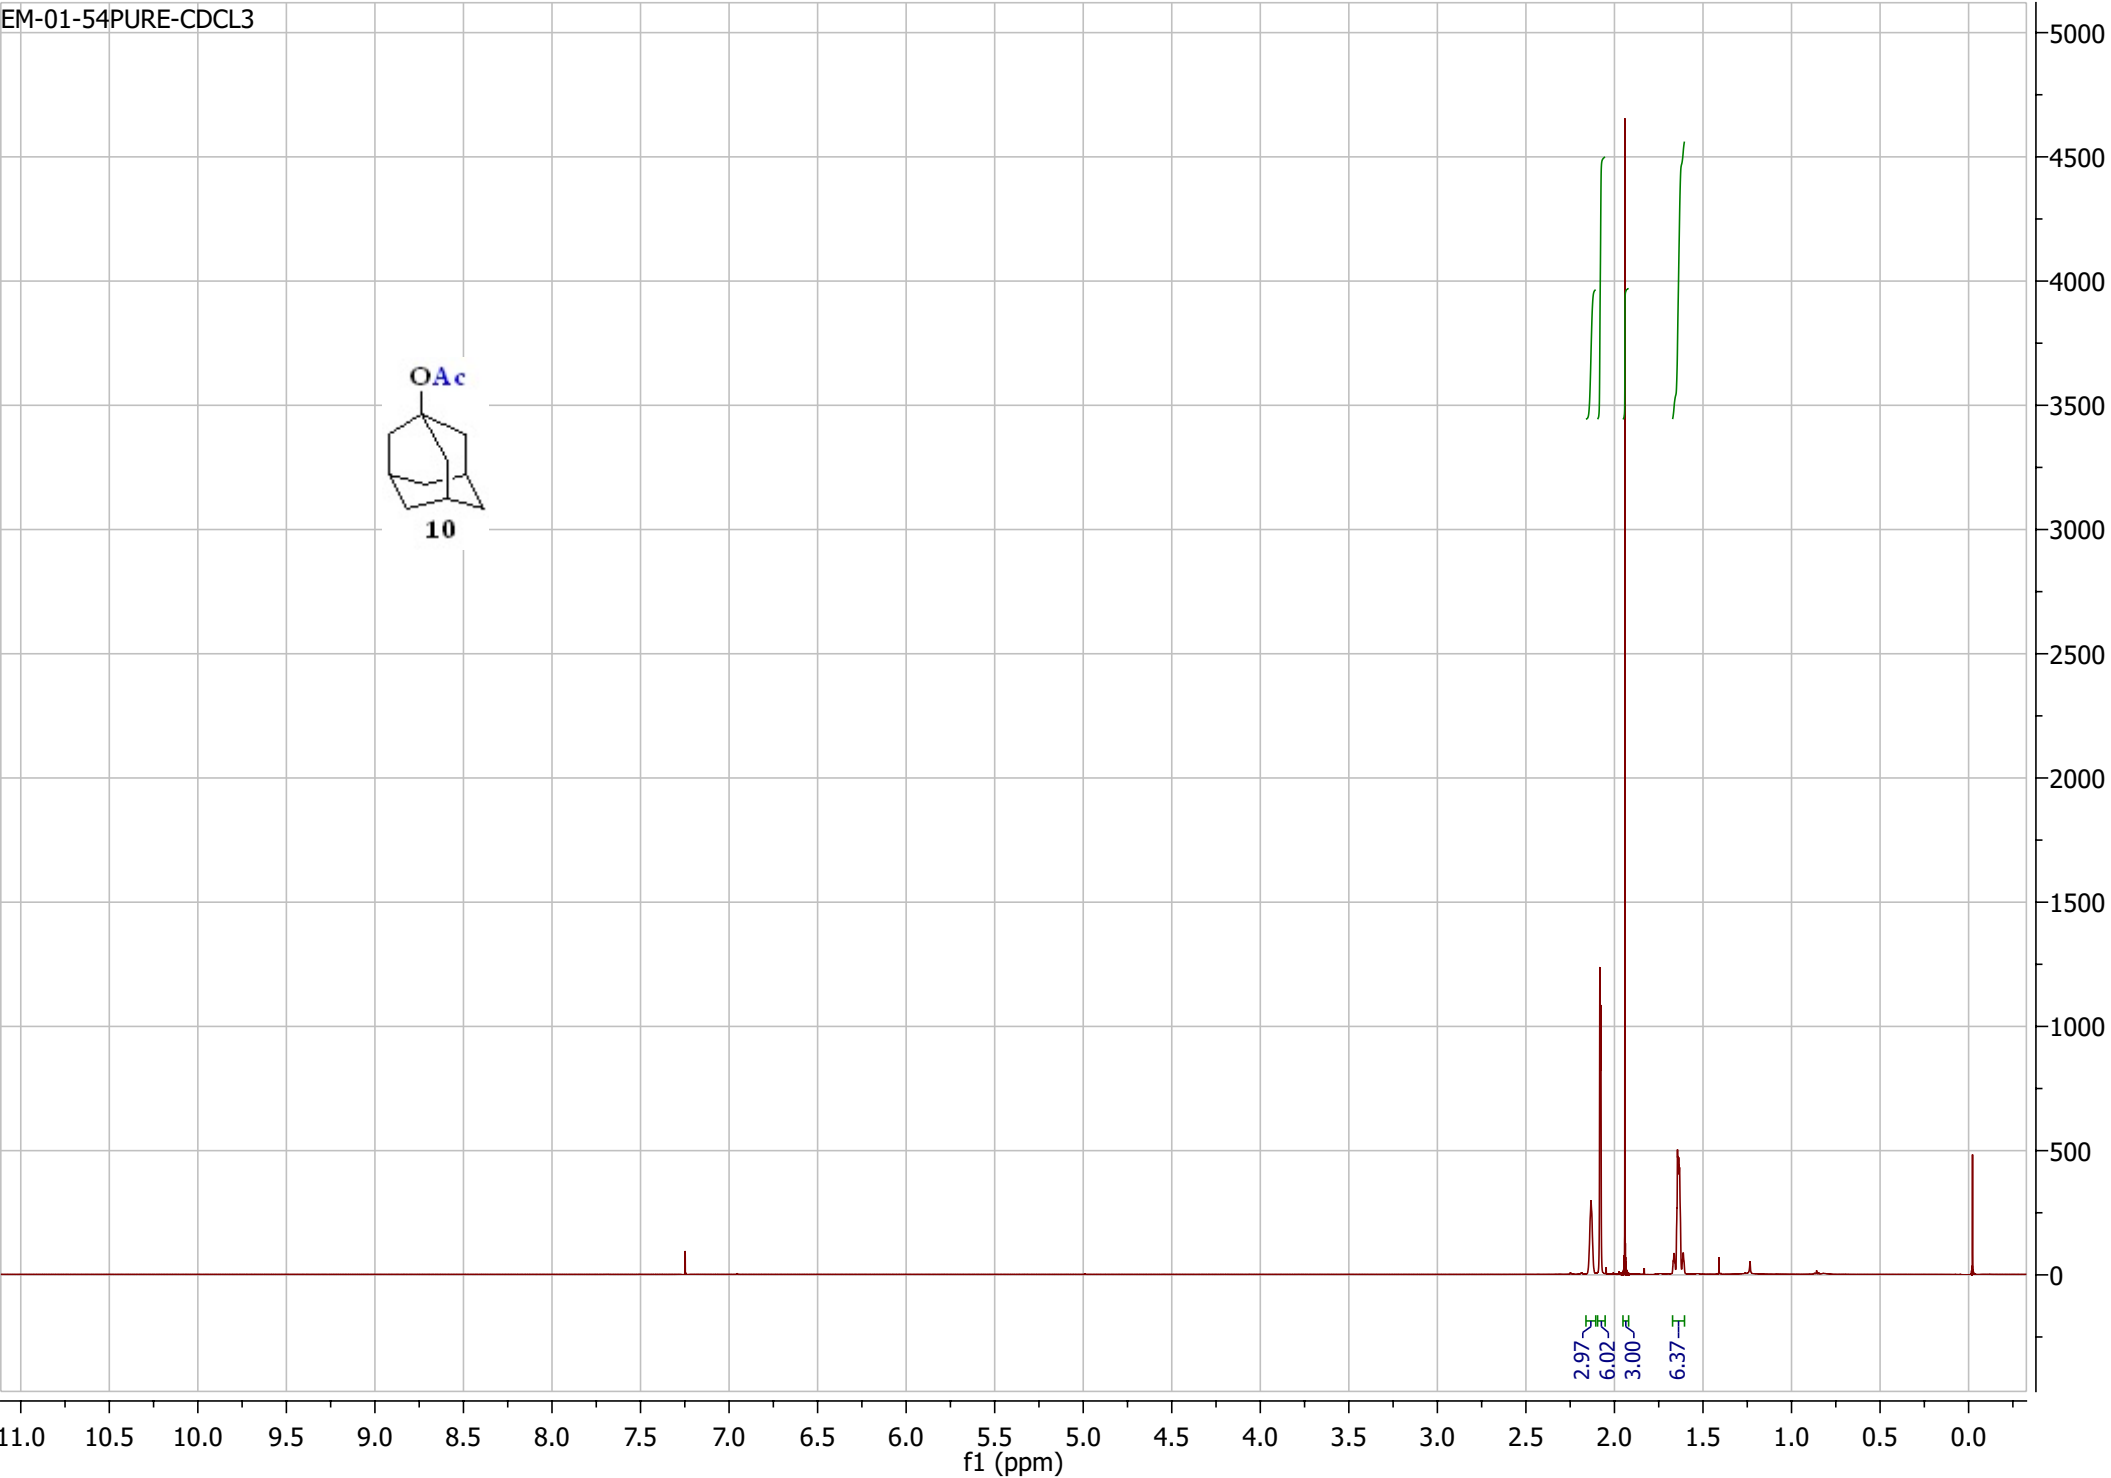

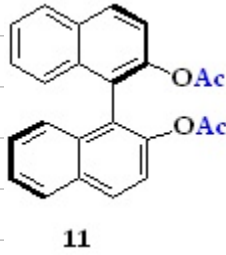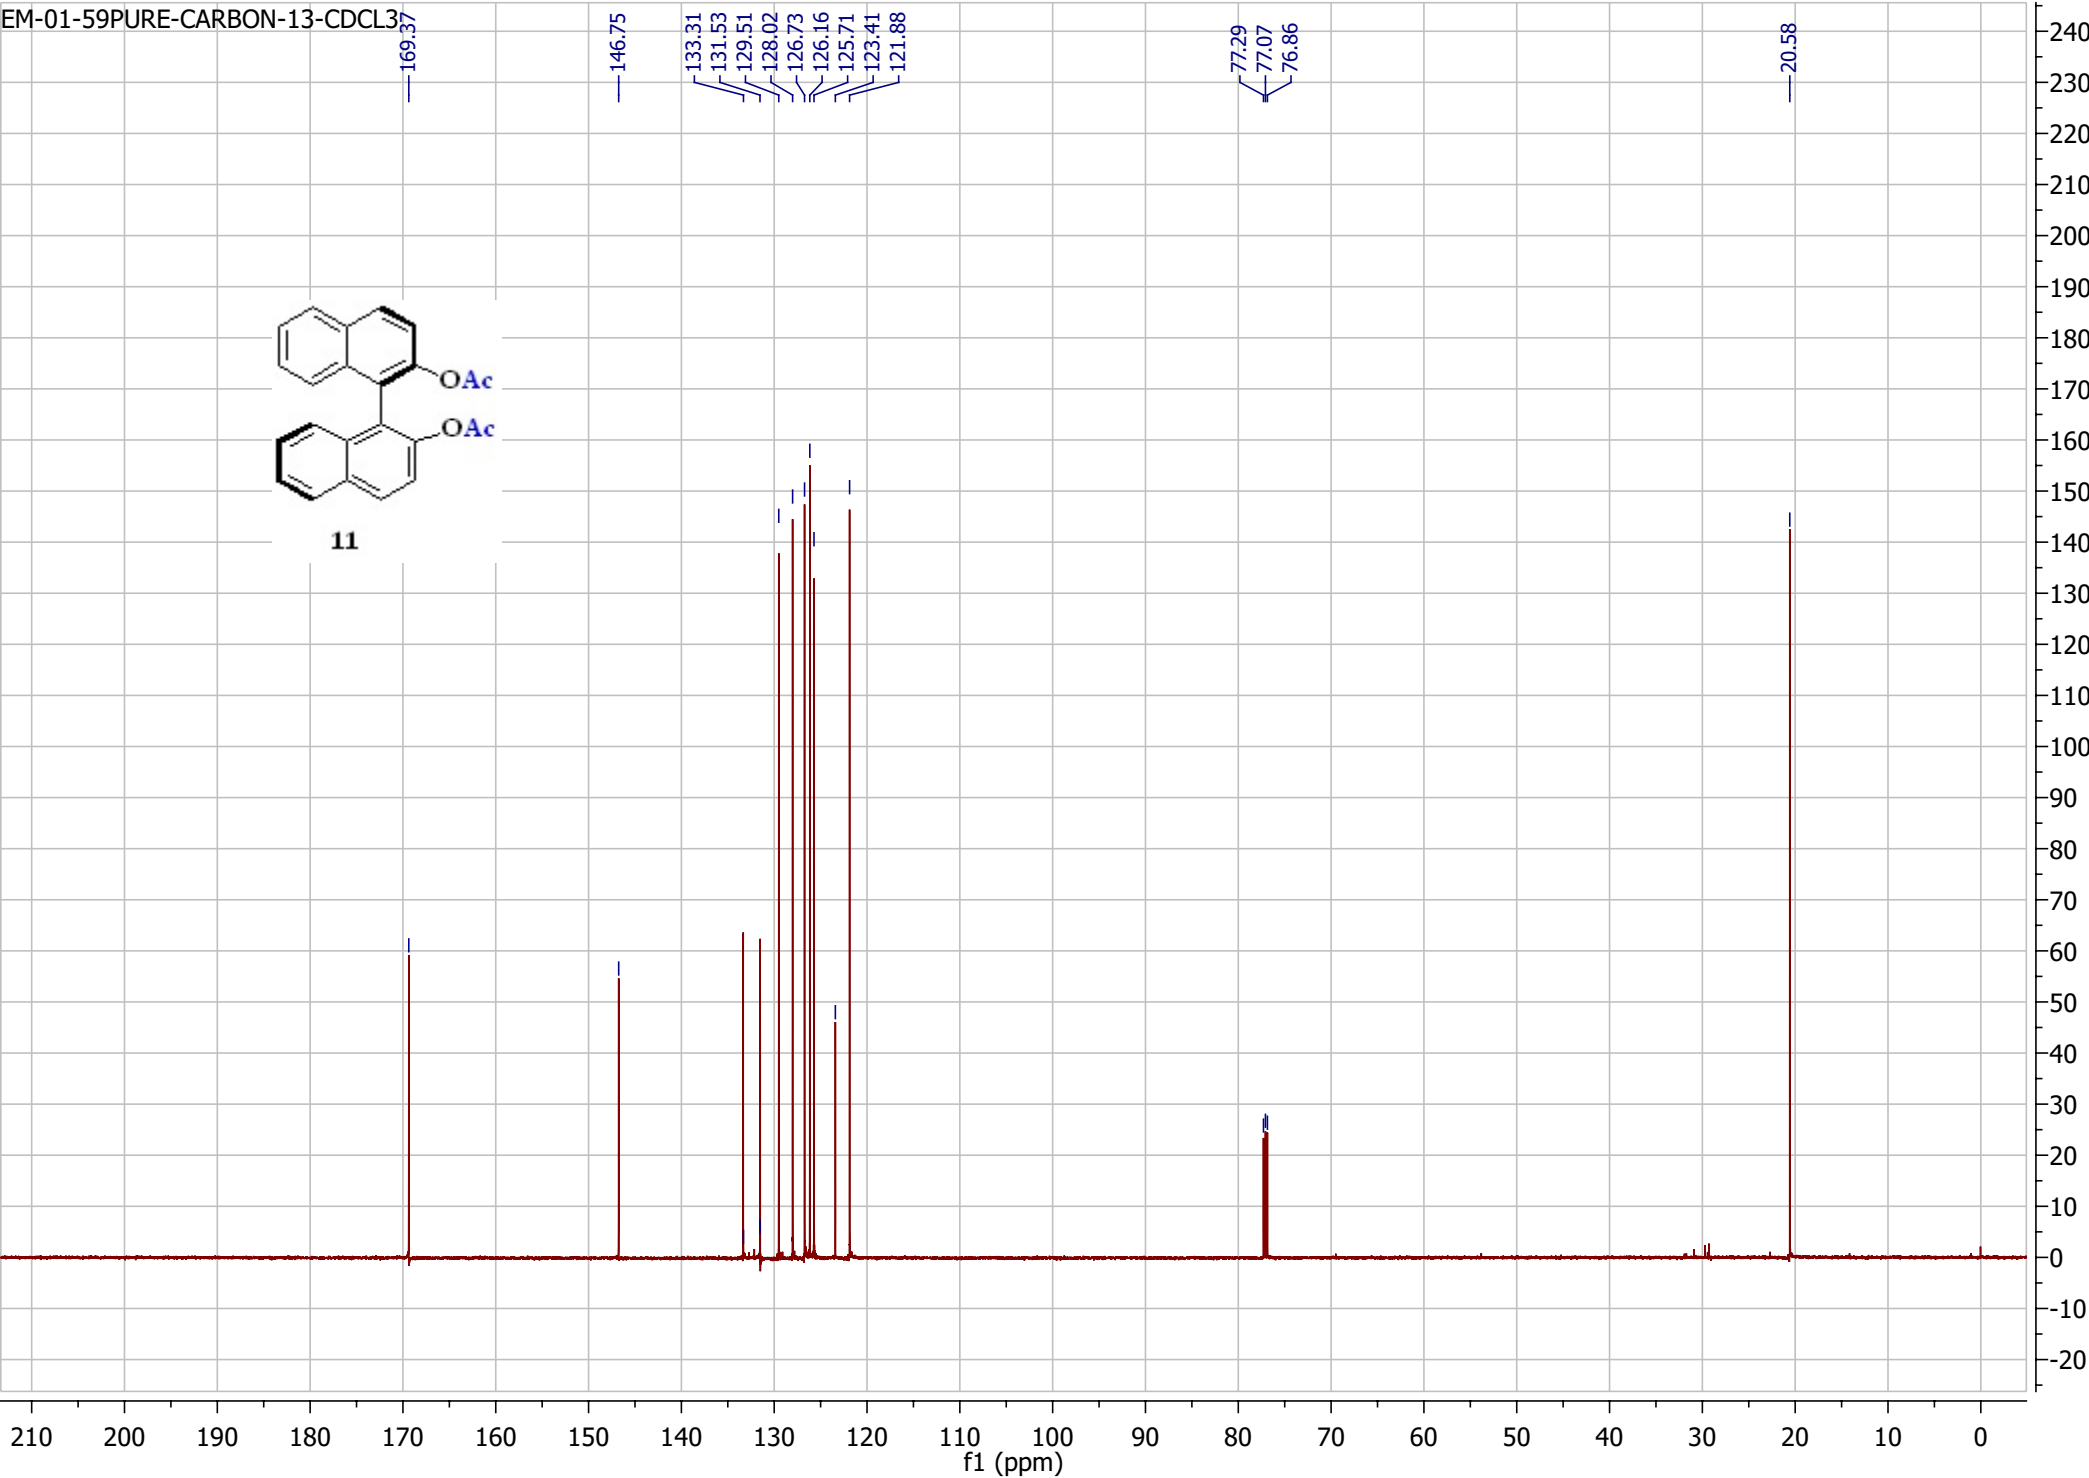

EM-01-59PURE-CDCL3

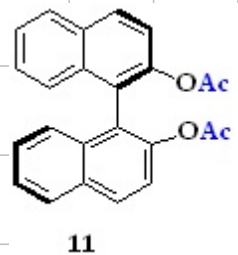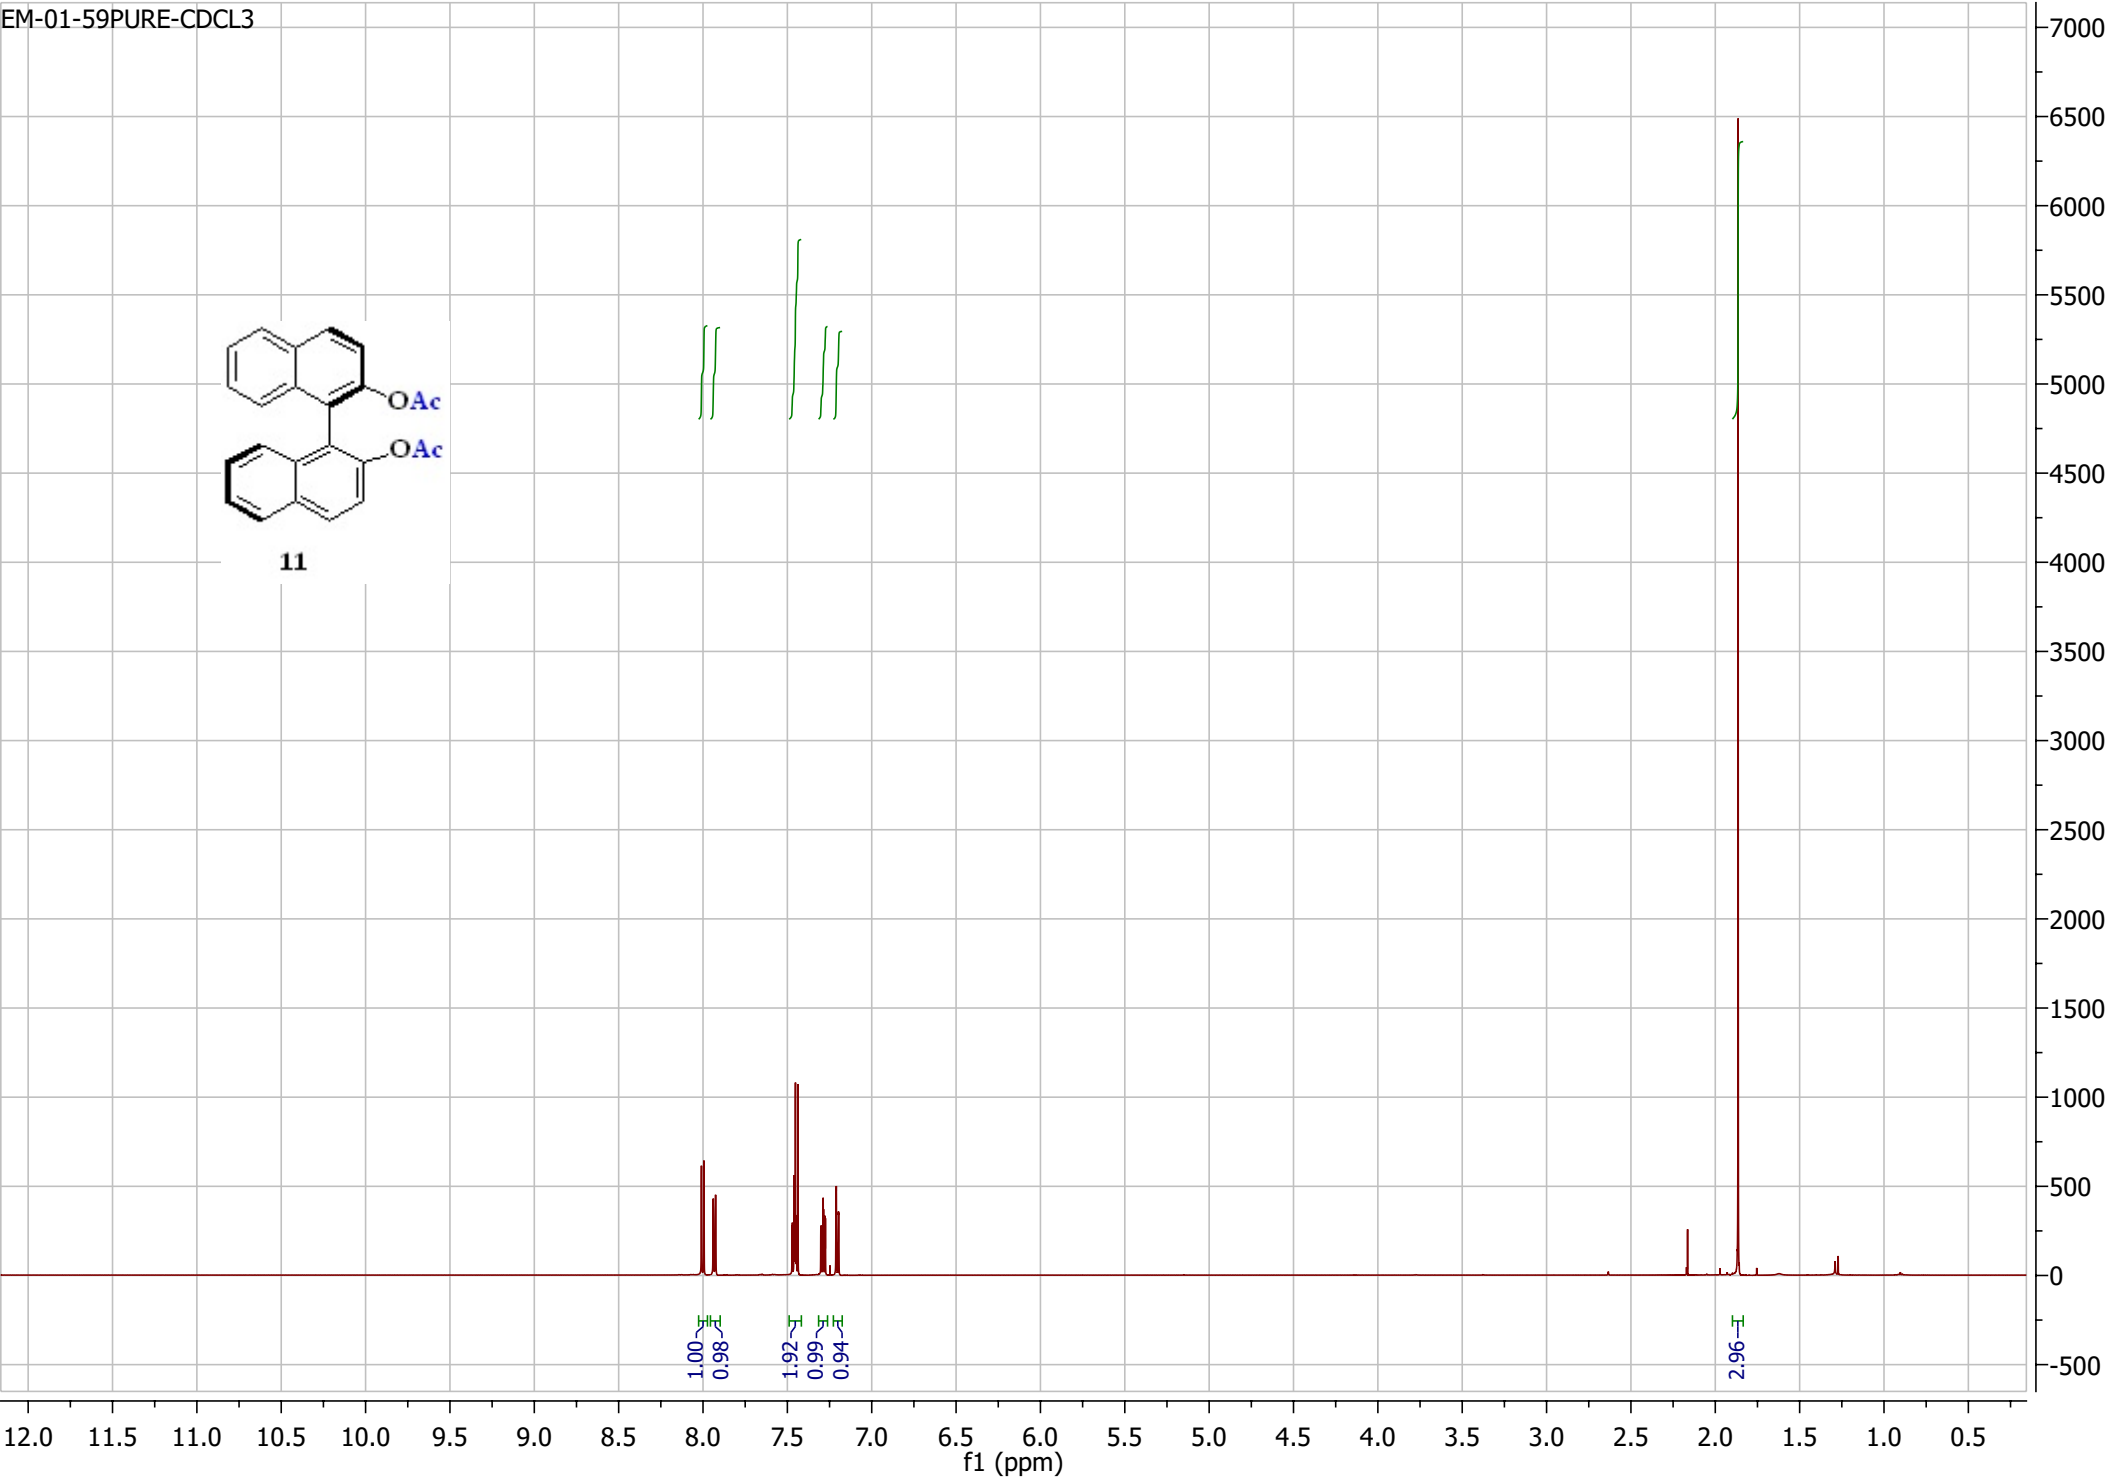



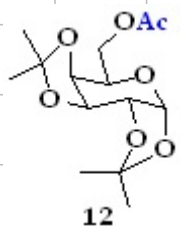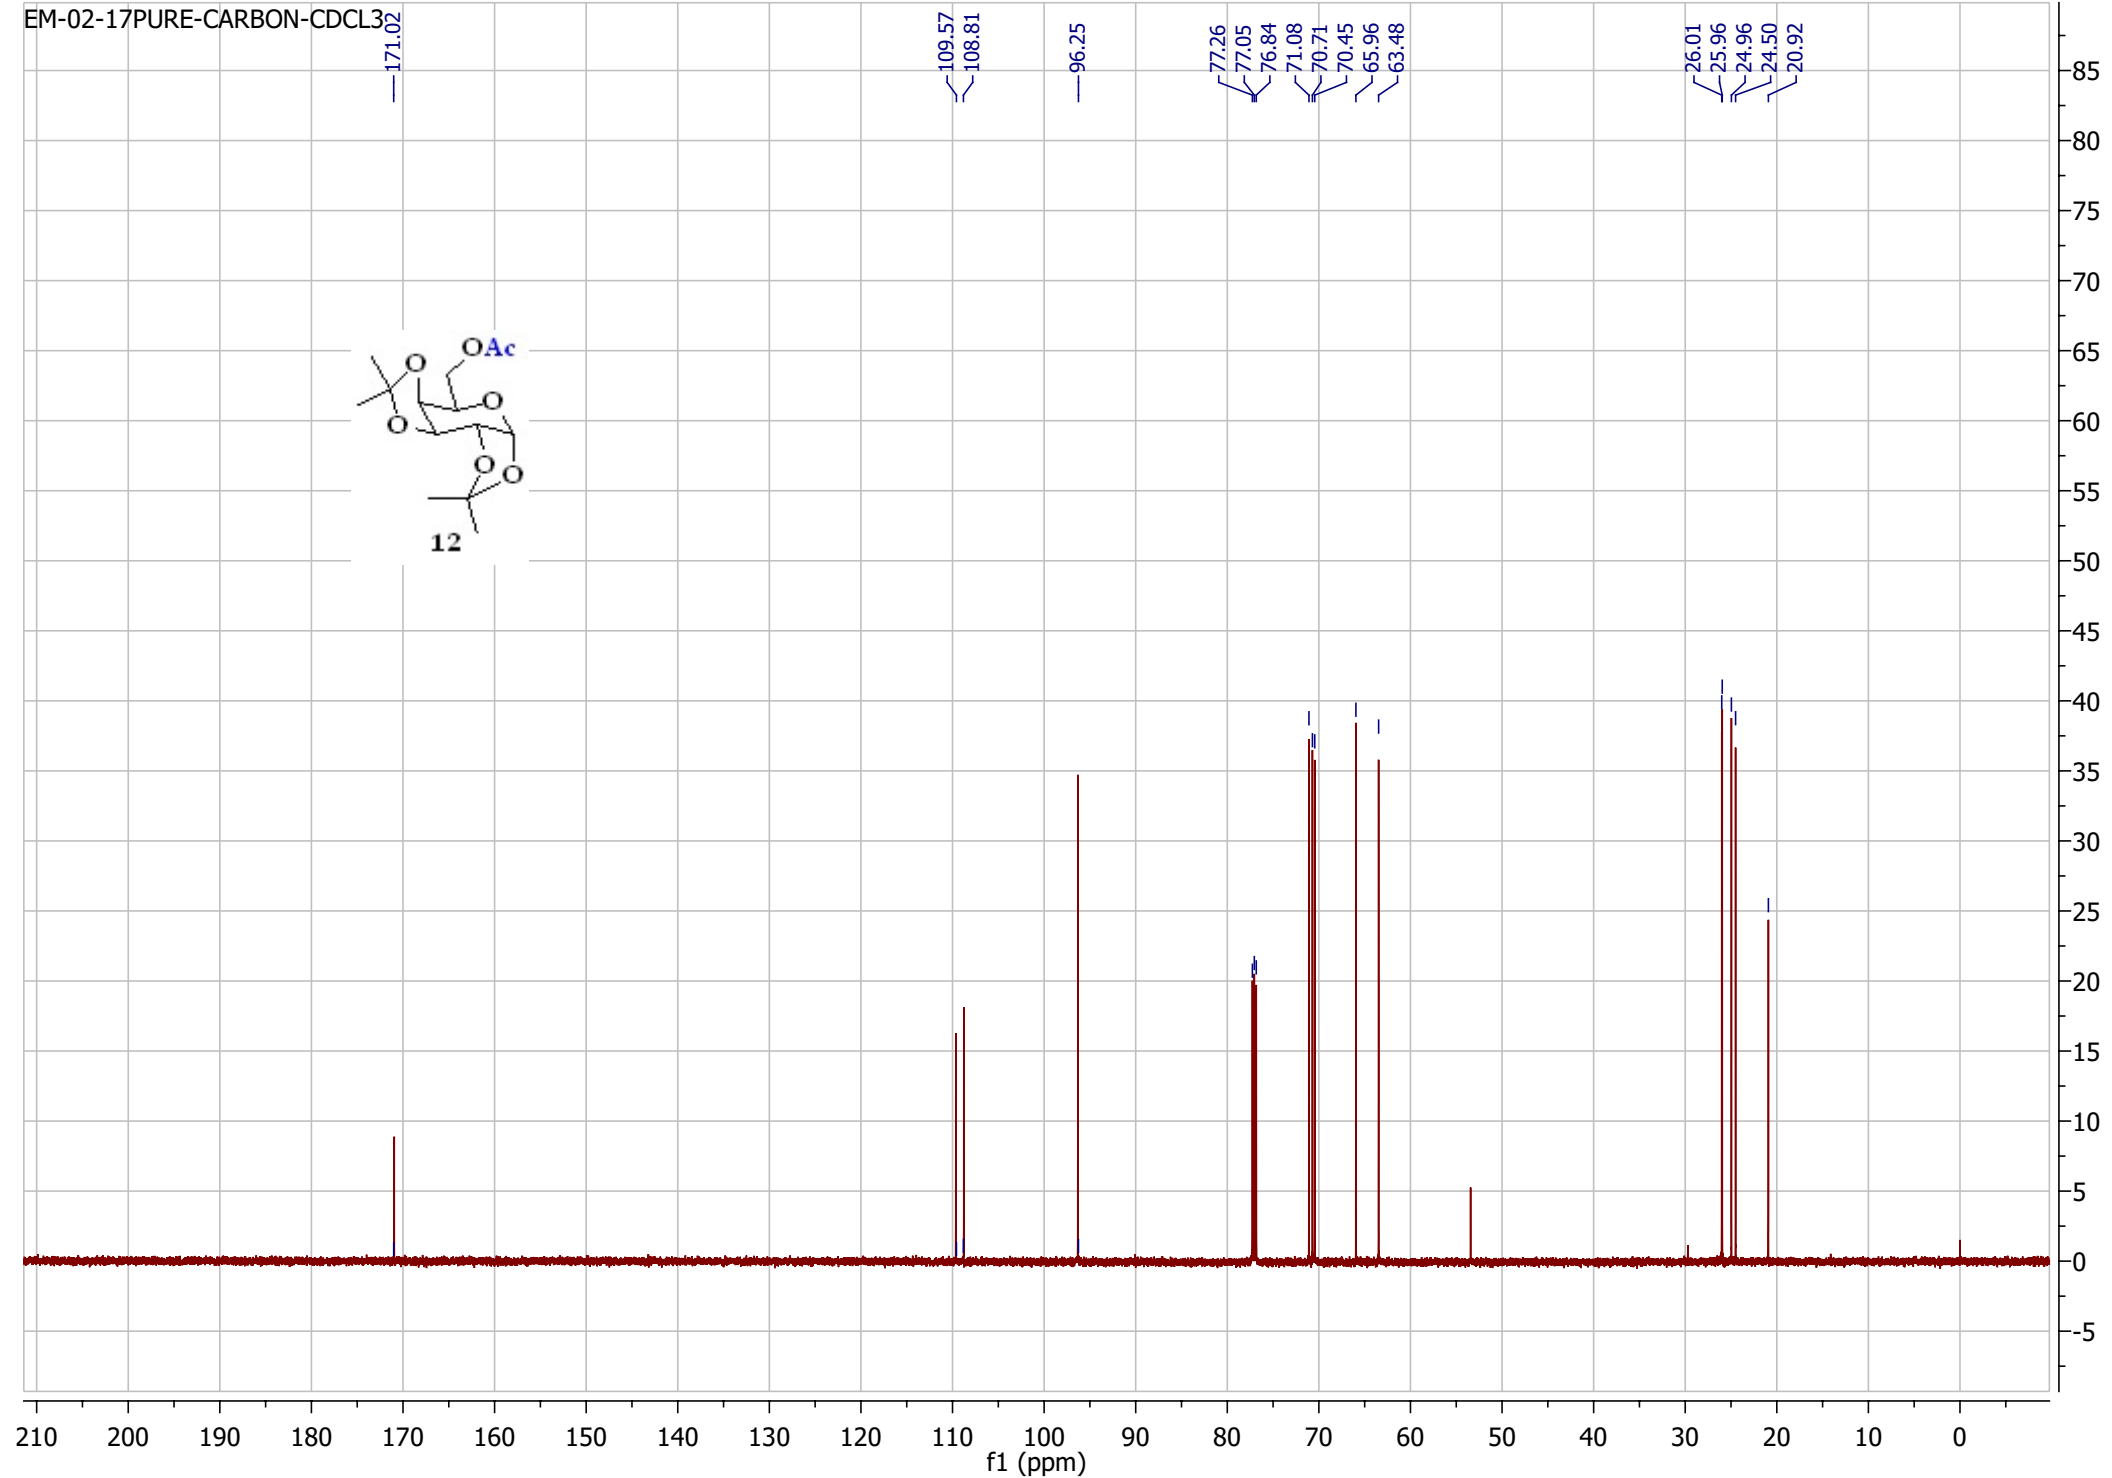

EM-02-17PURE-CDCL3

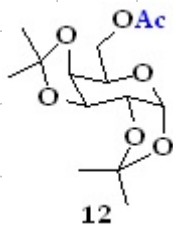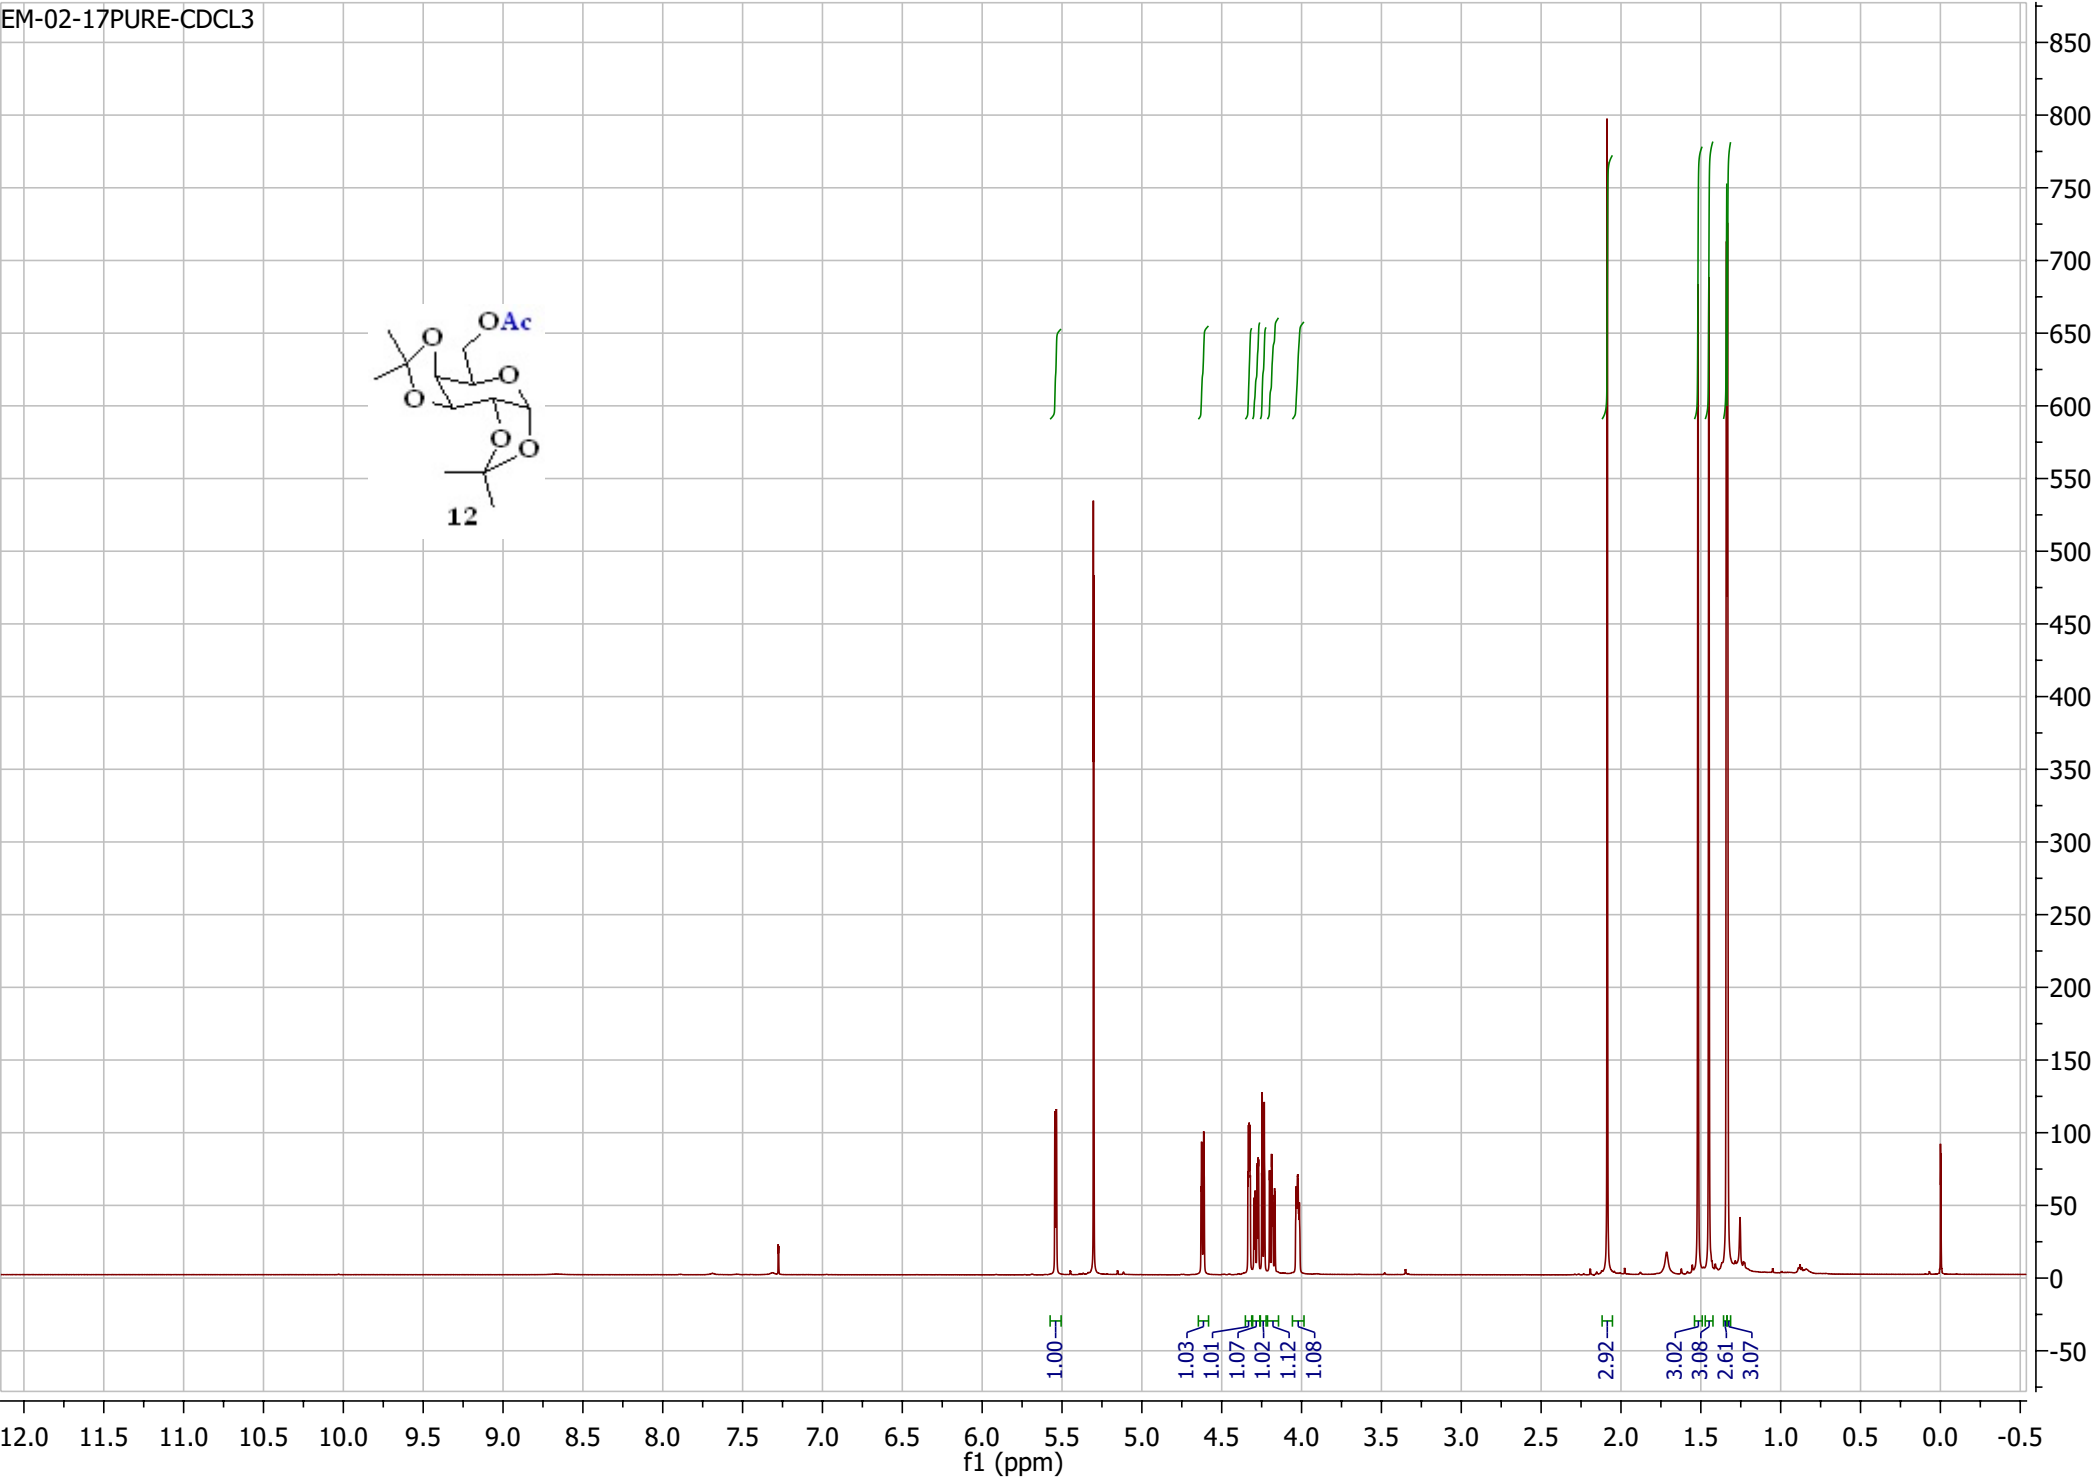

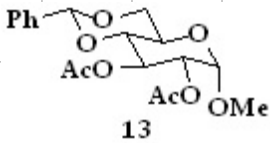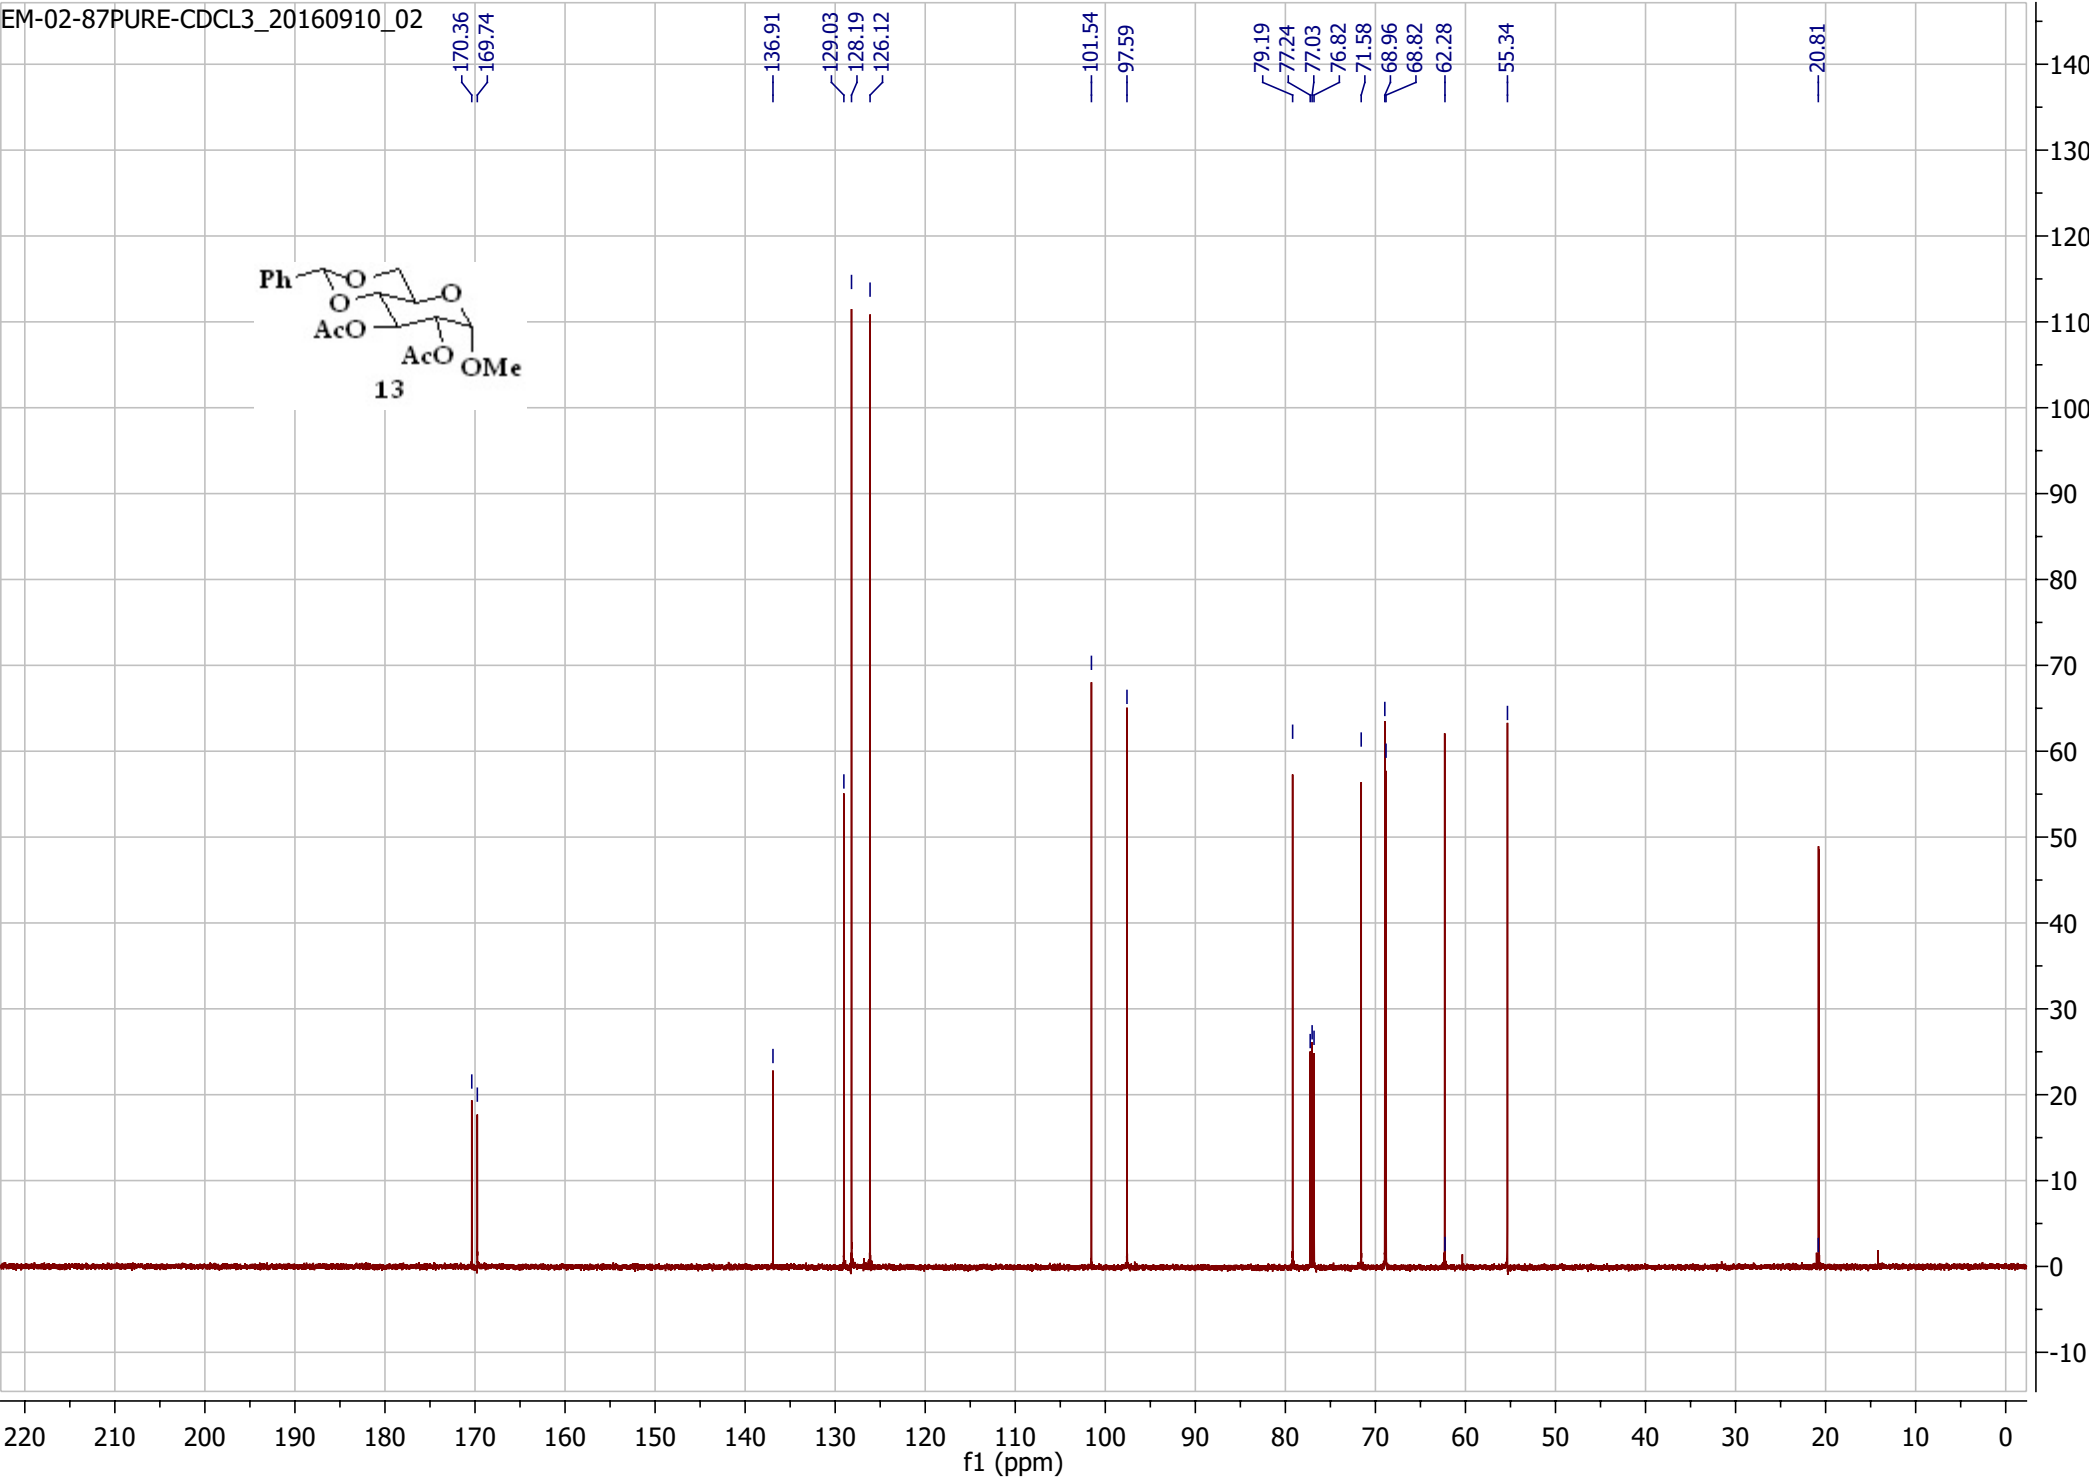

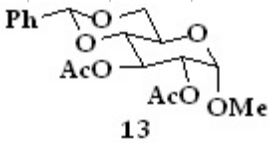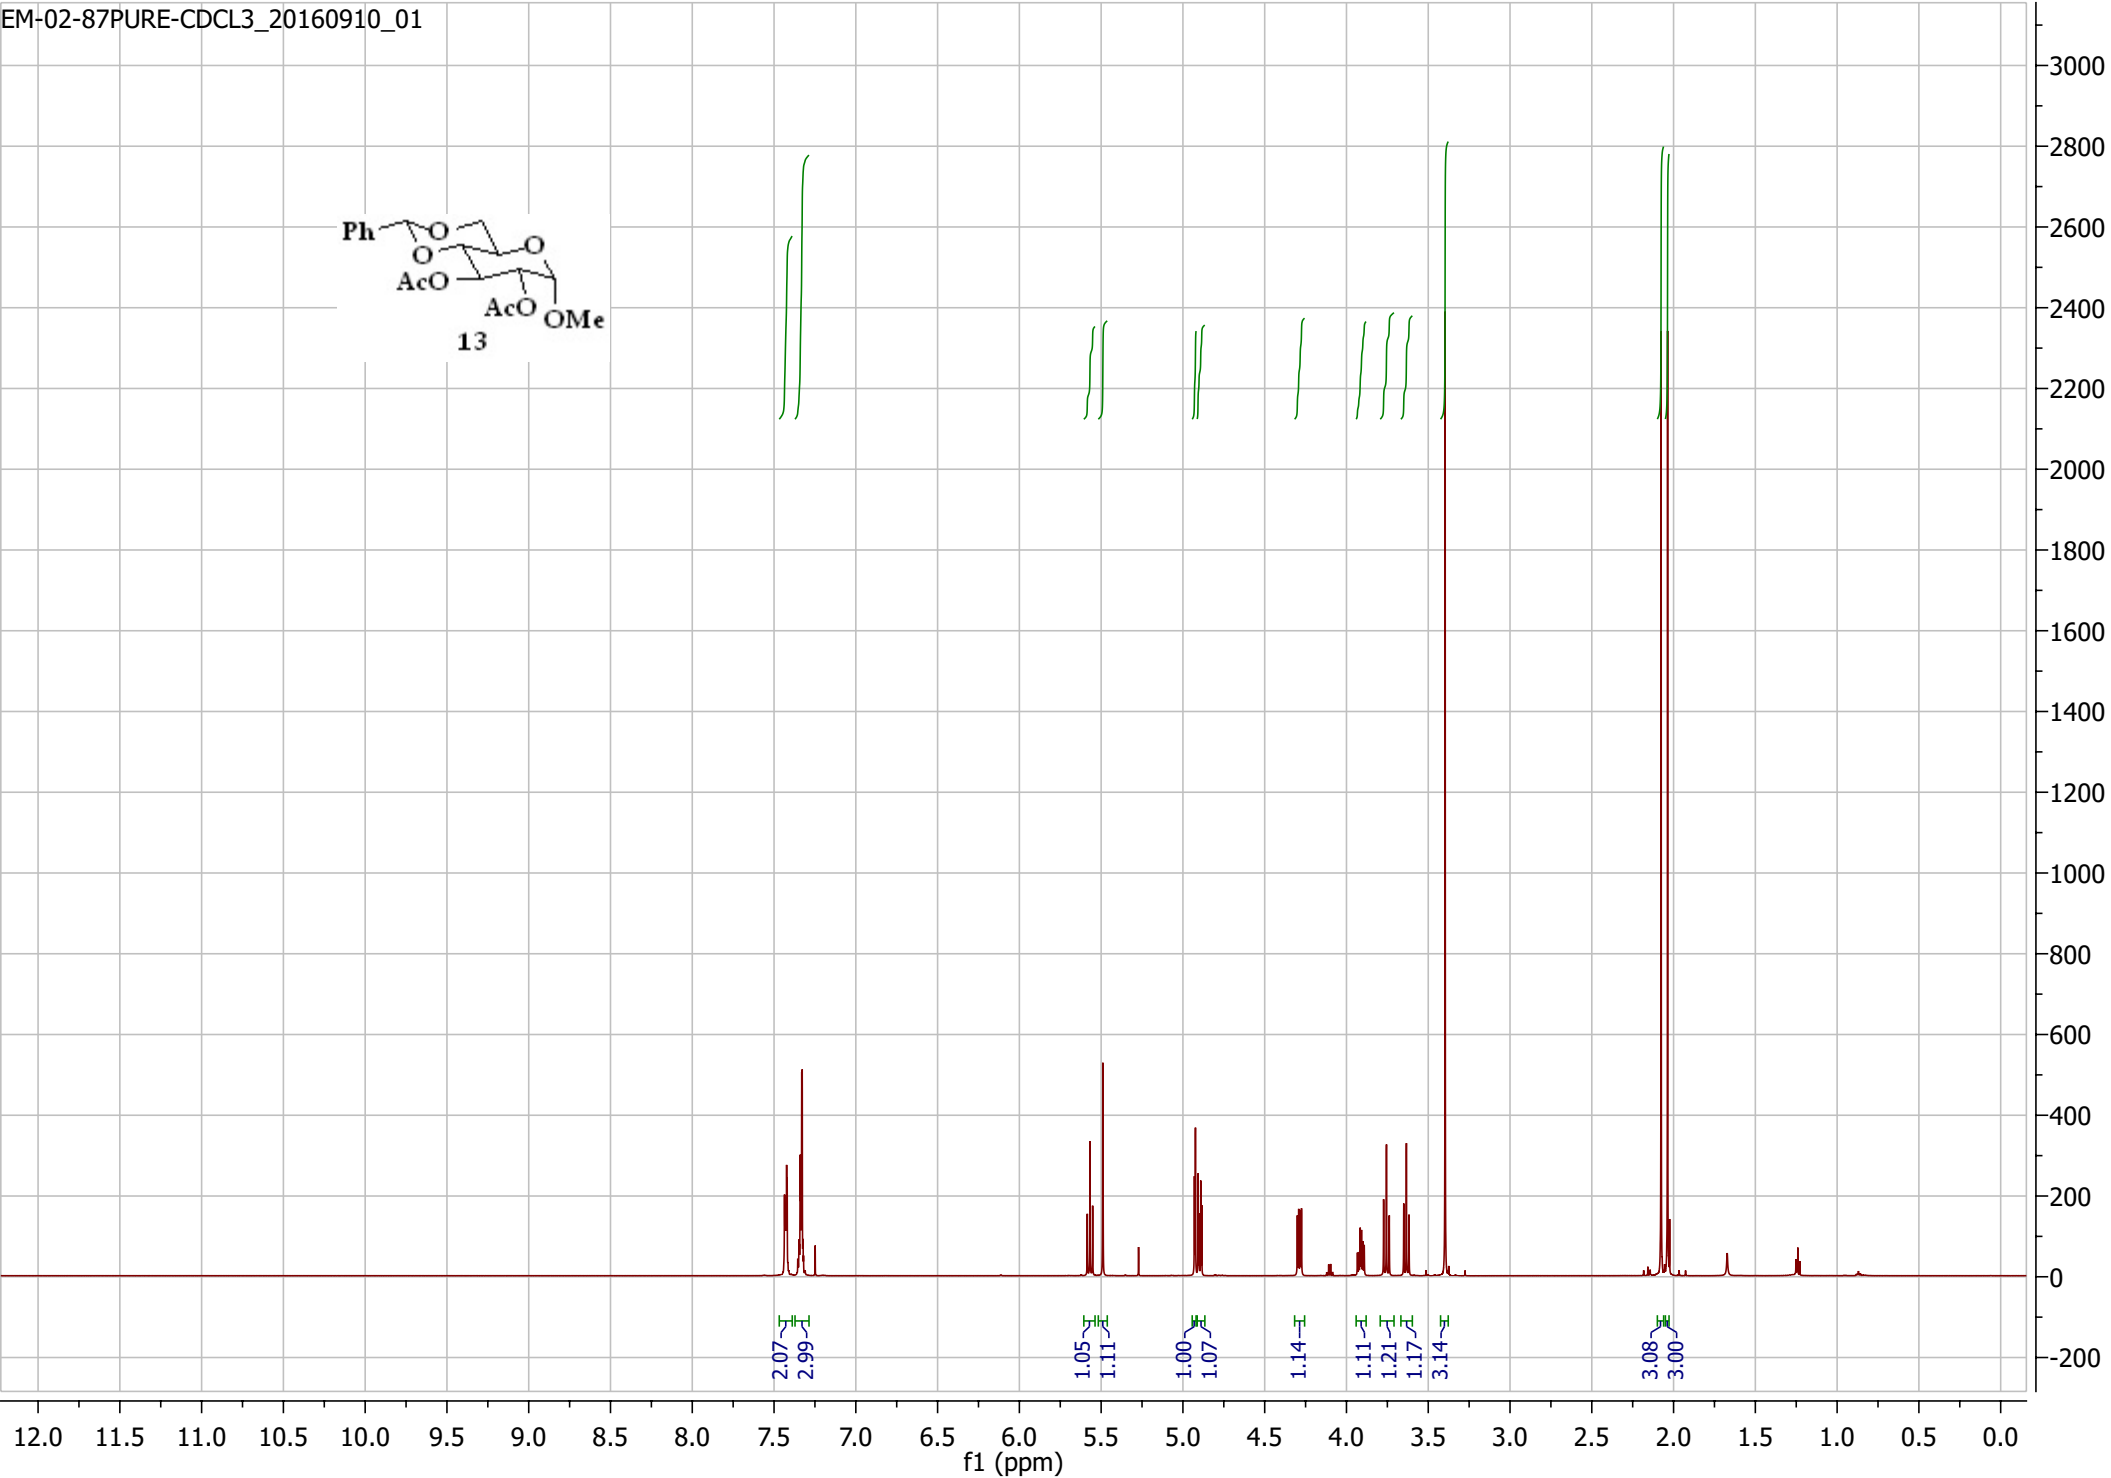

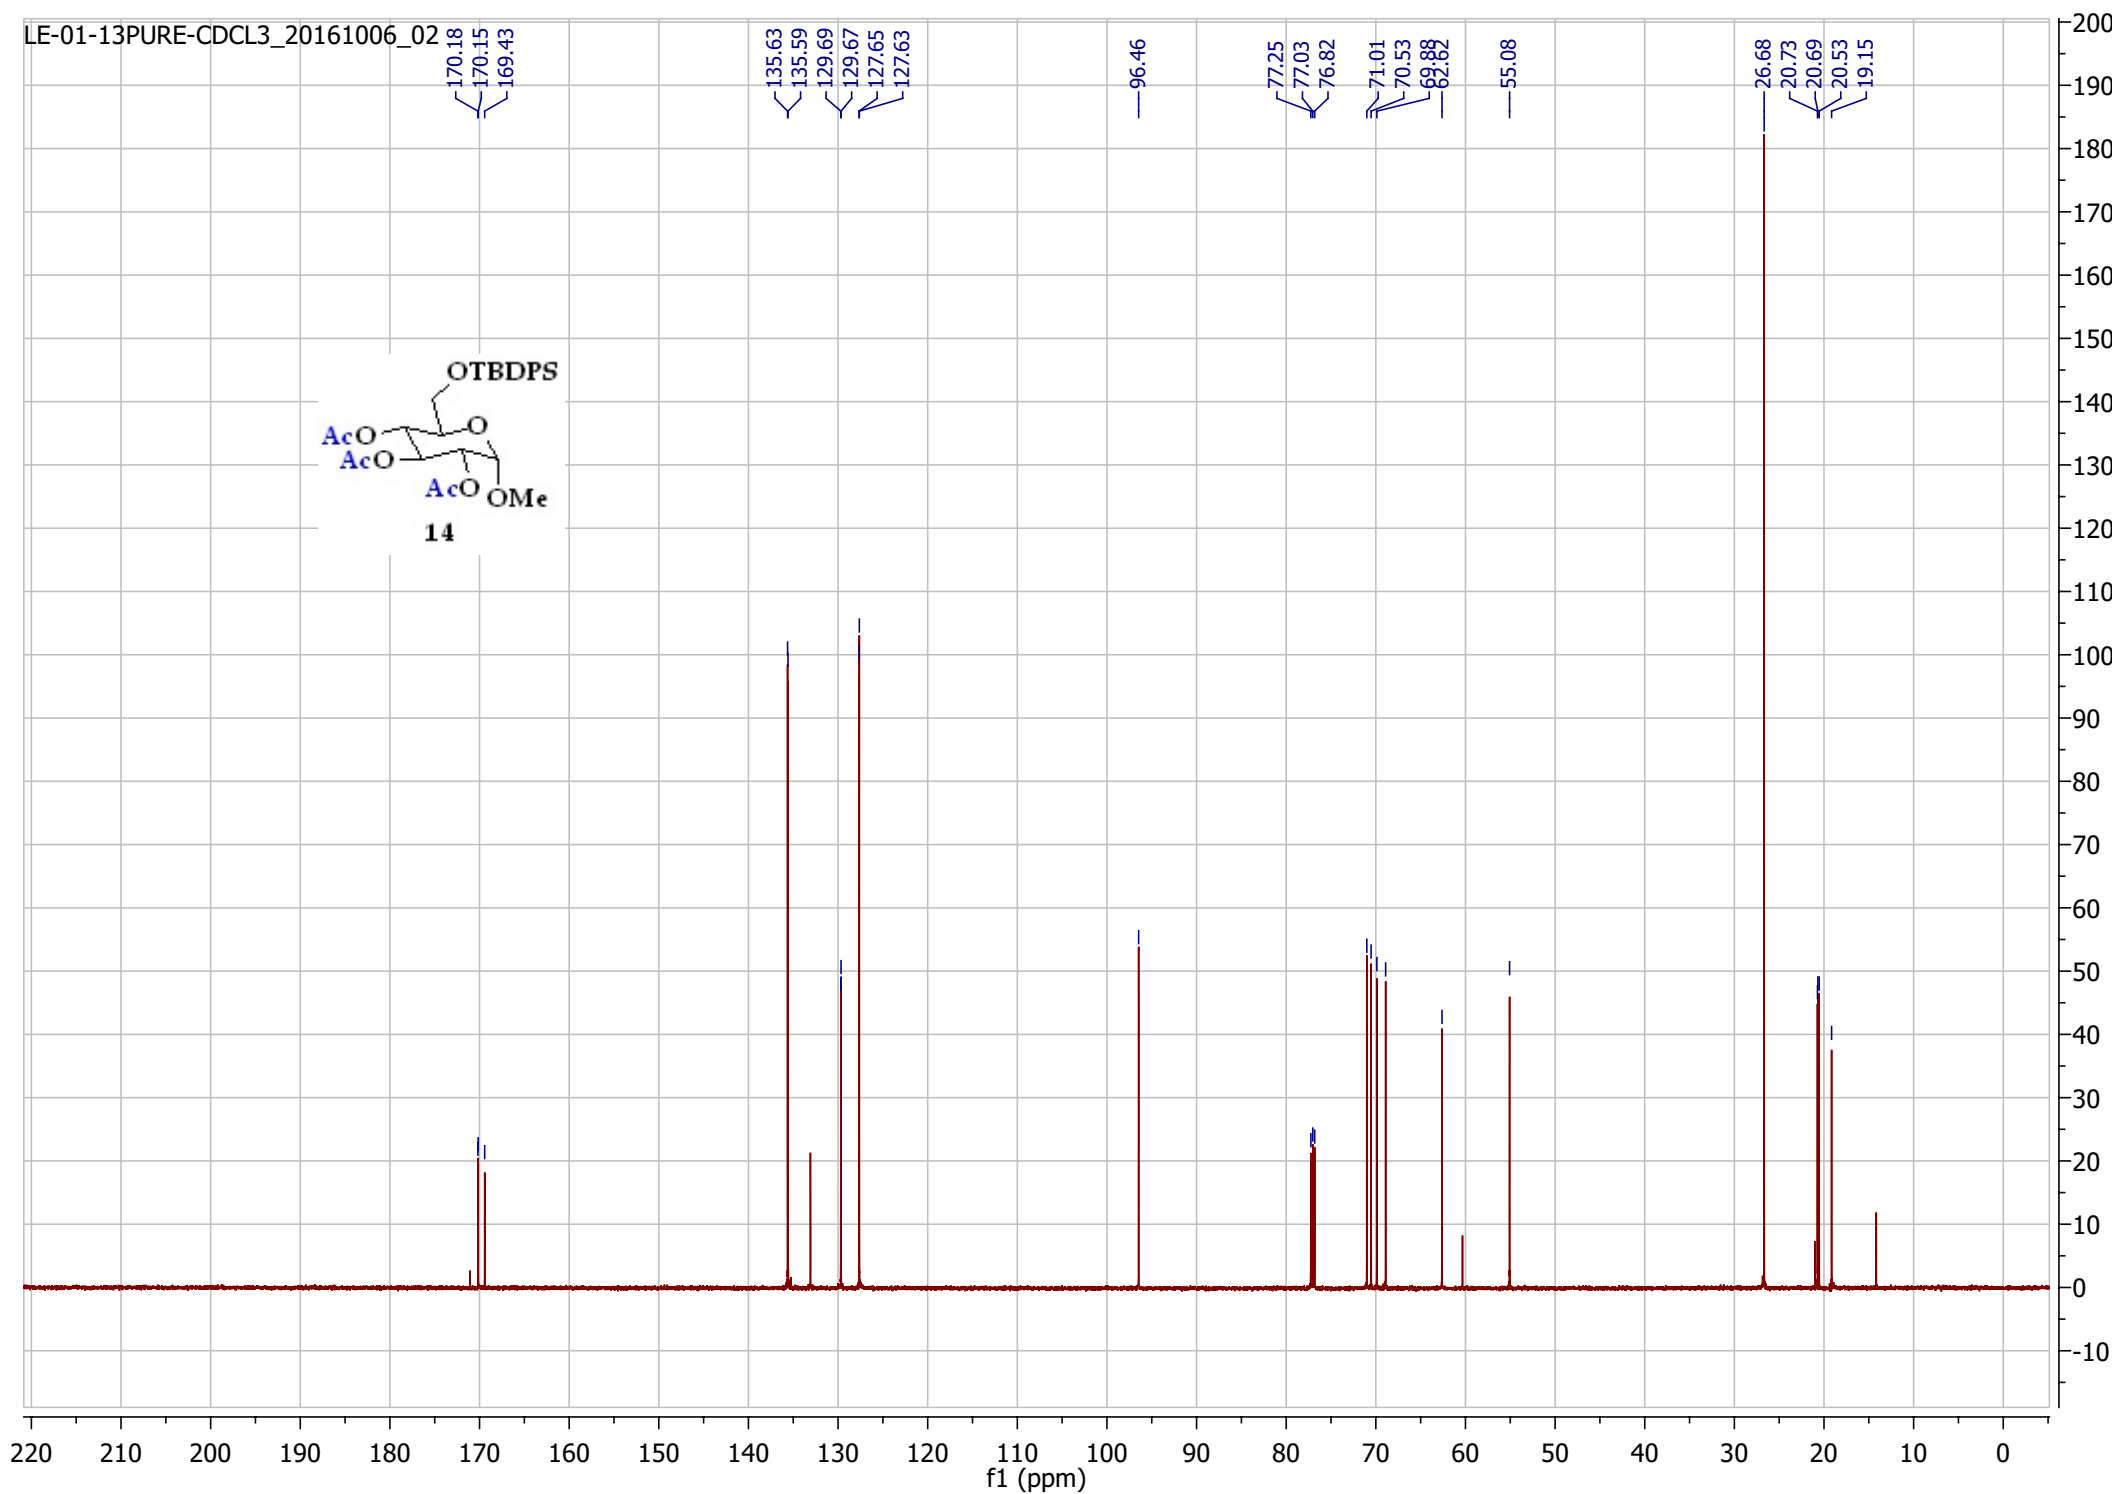

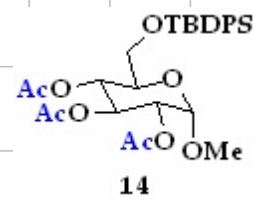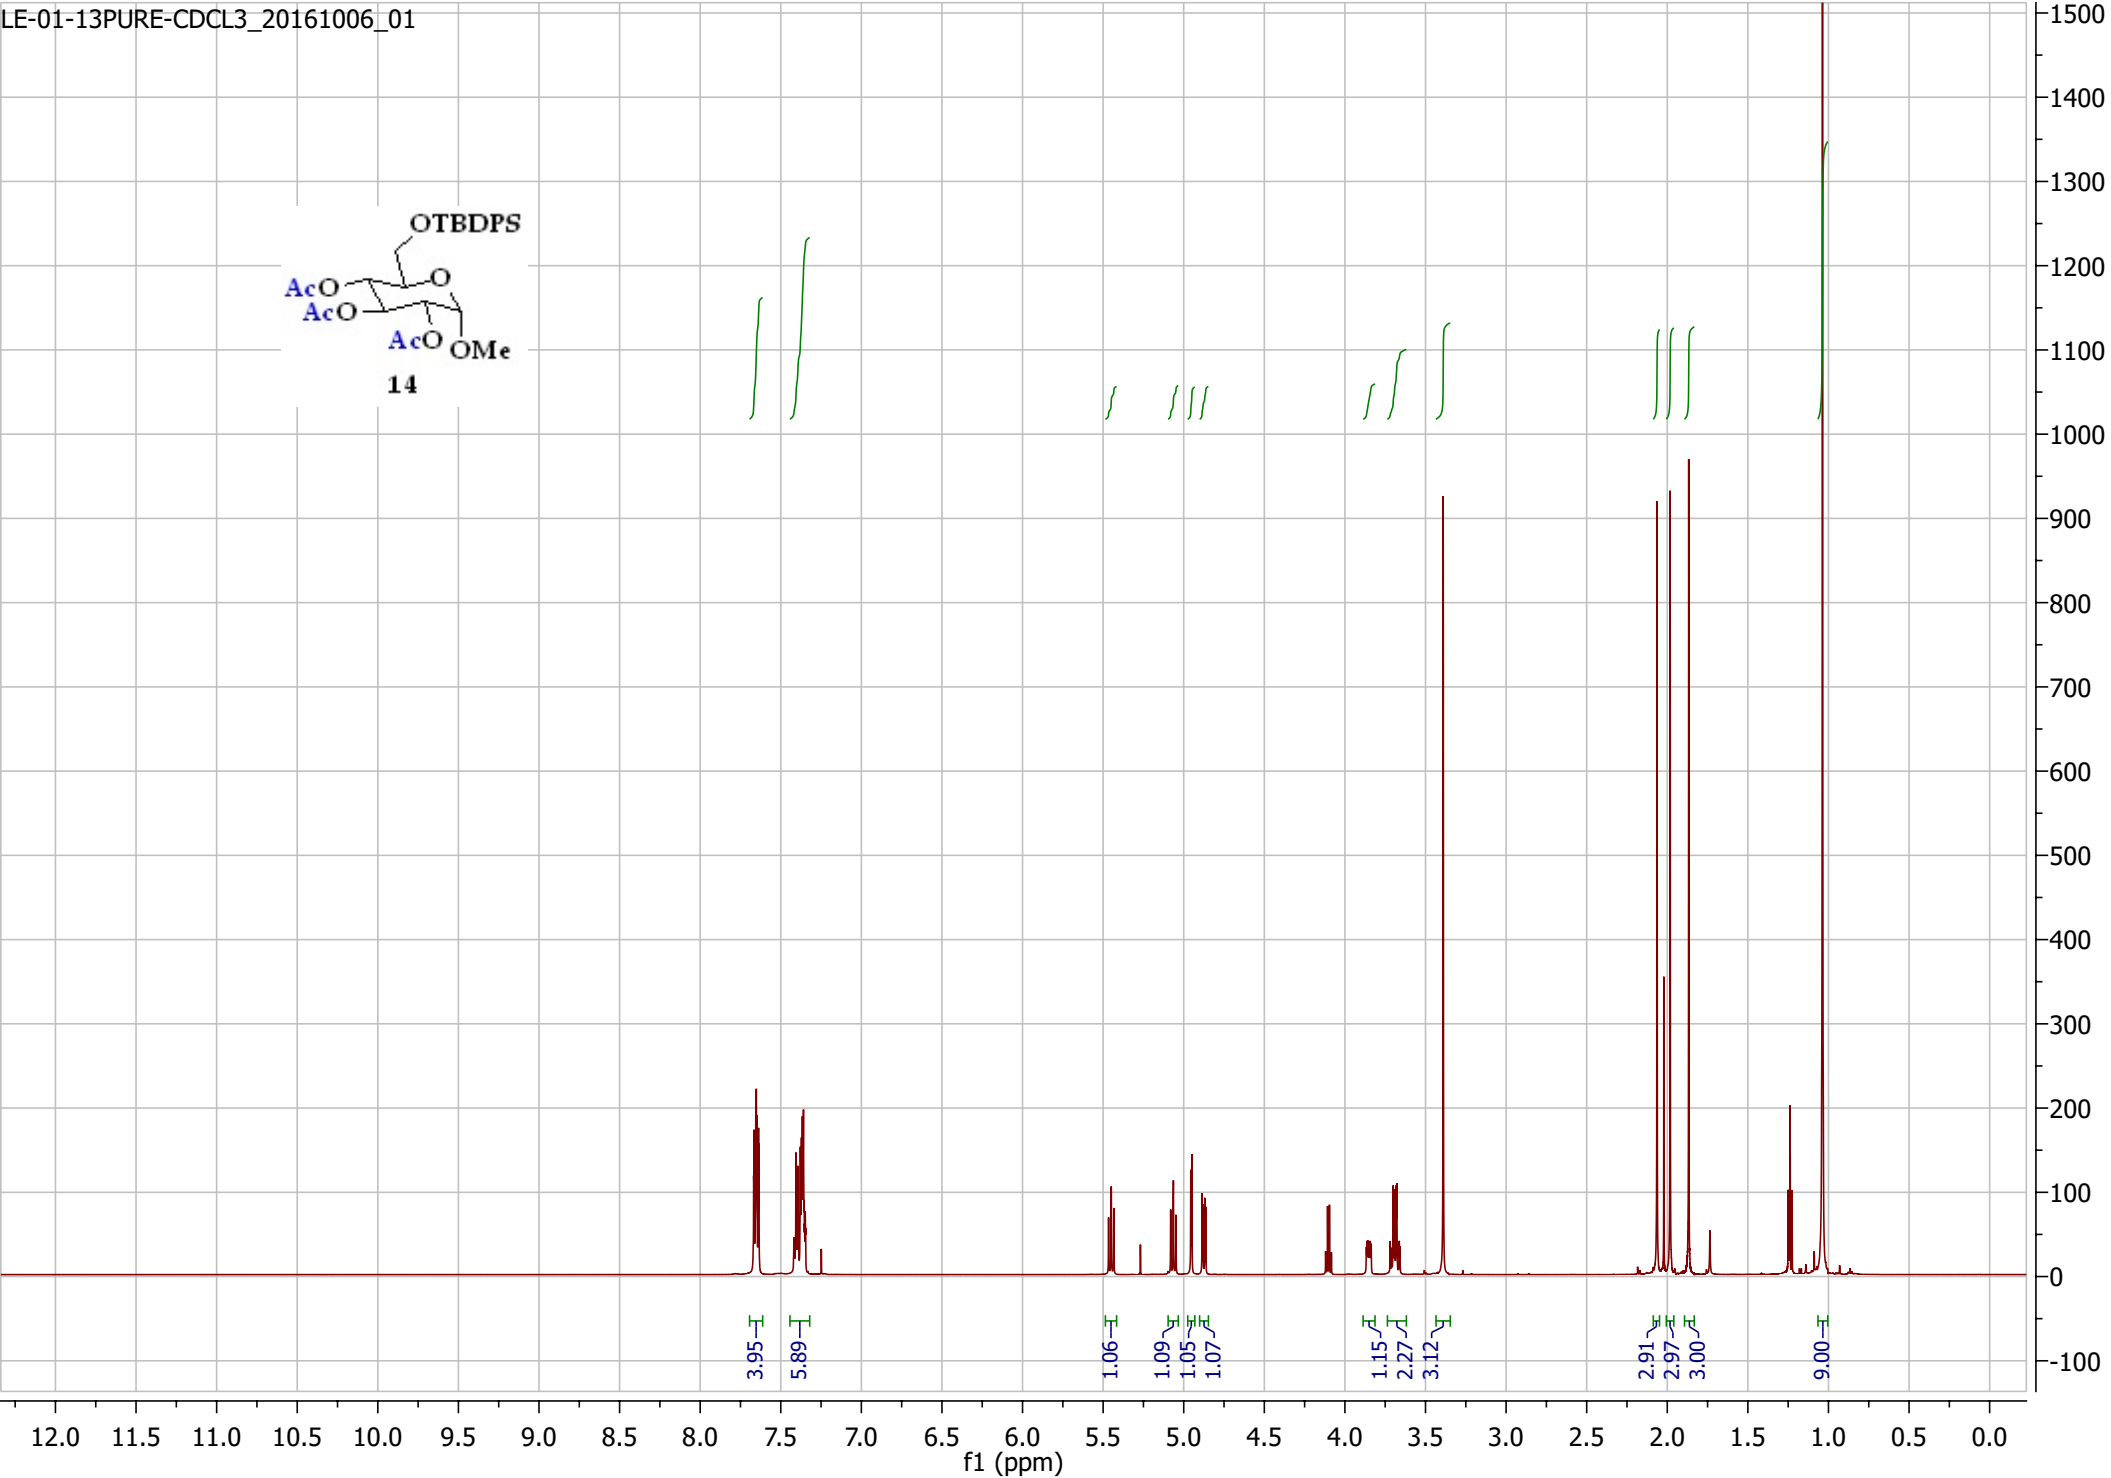

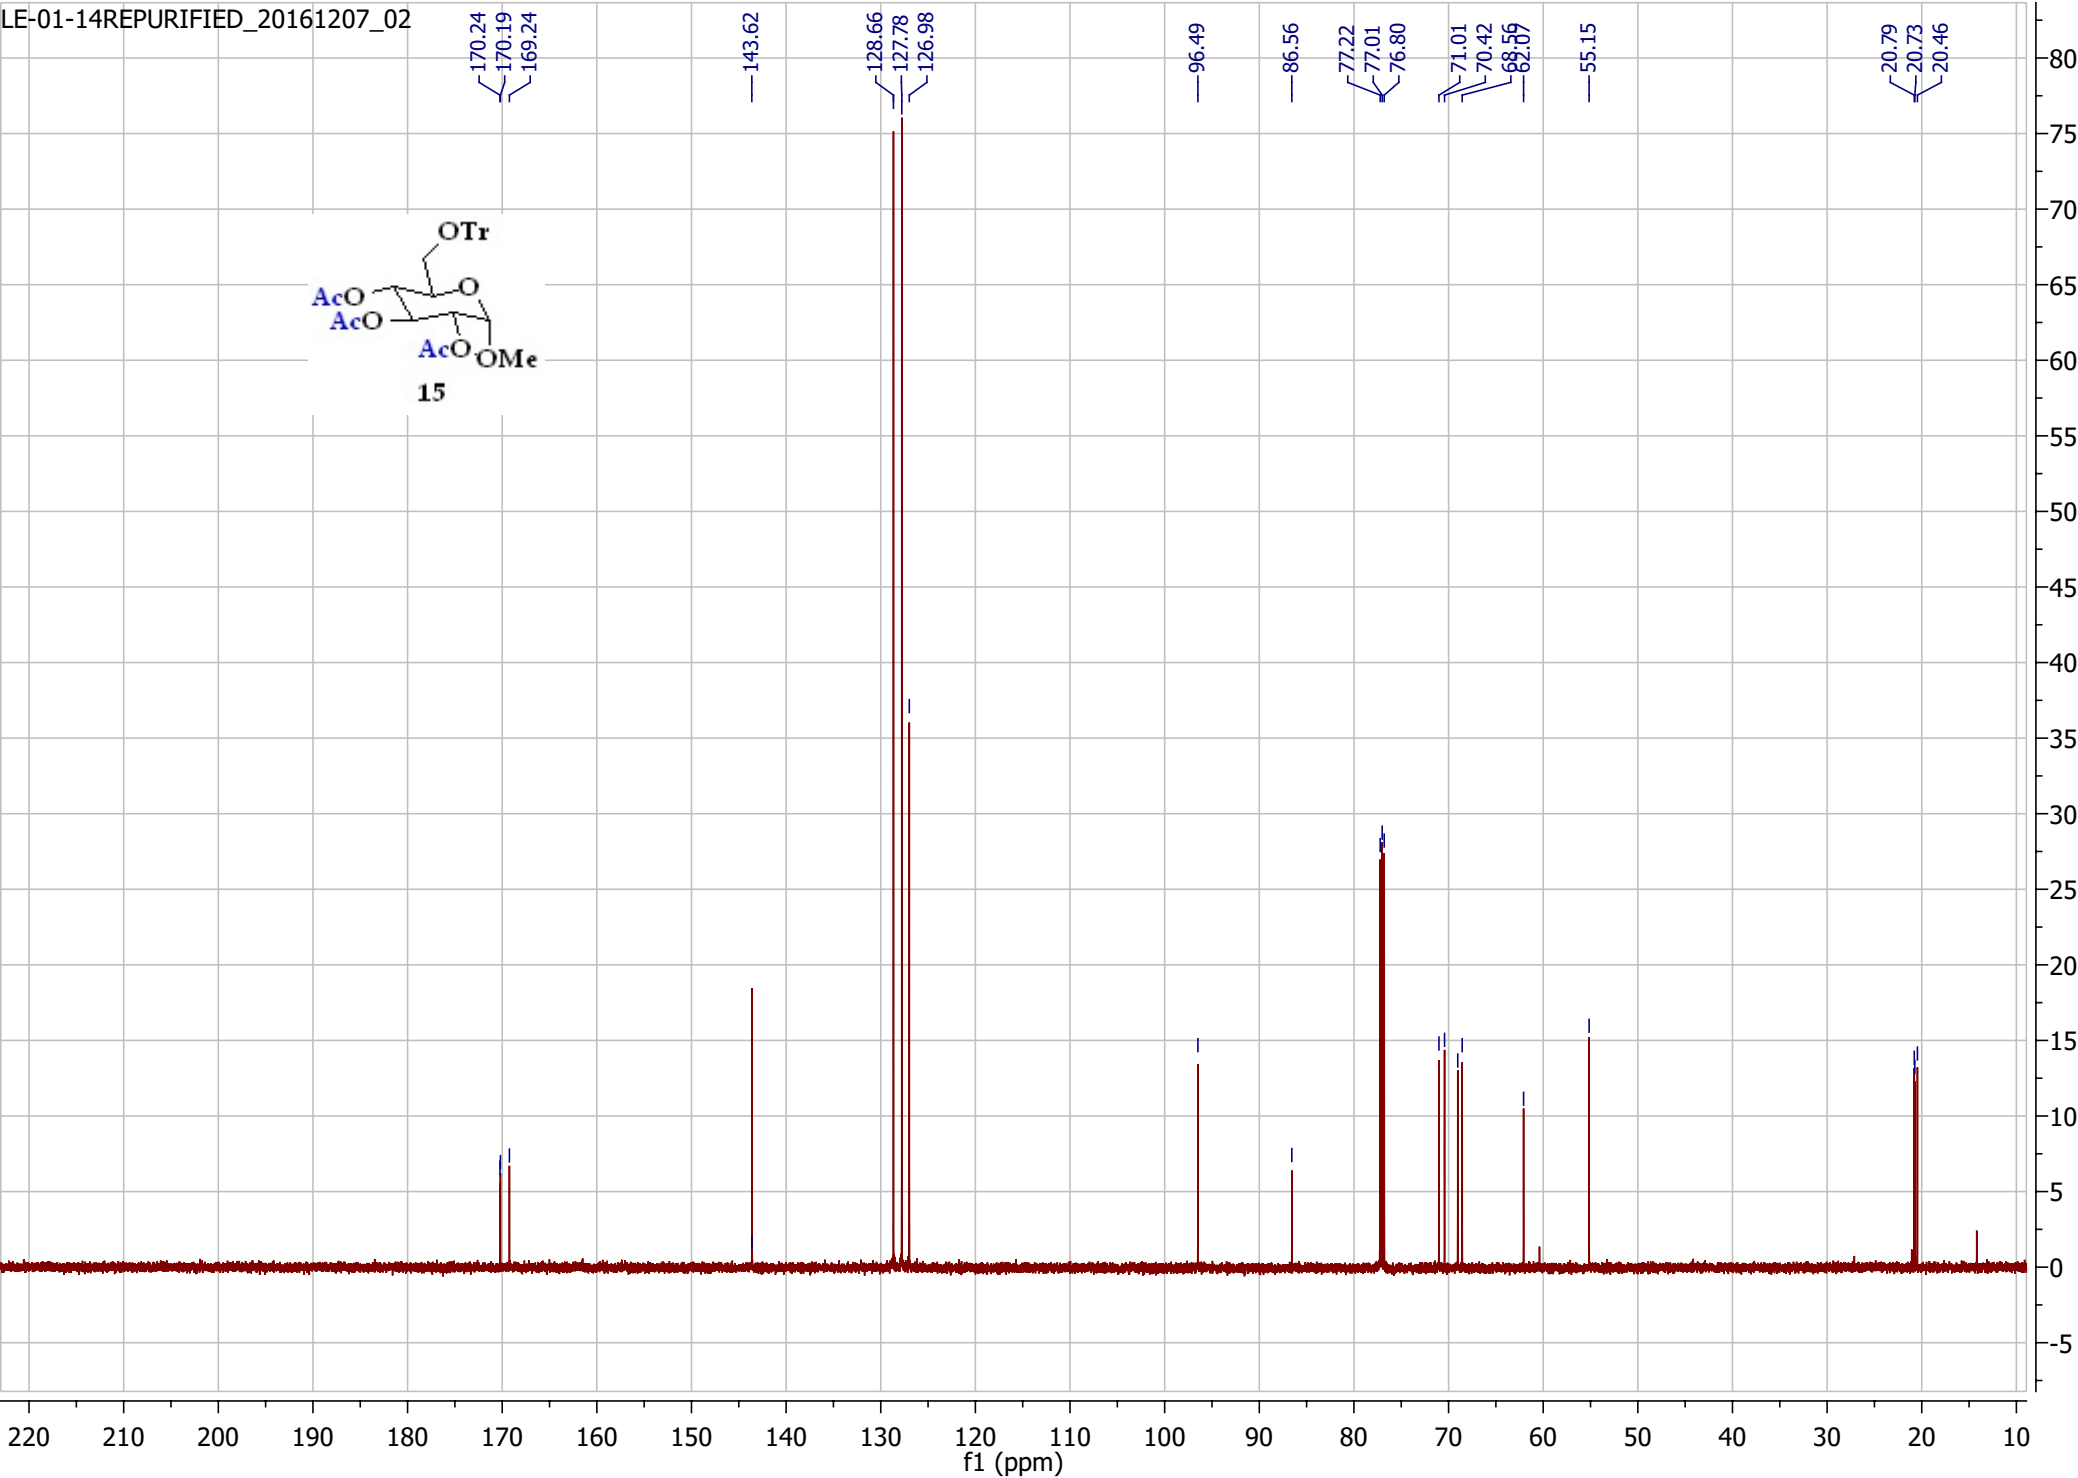

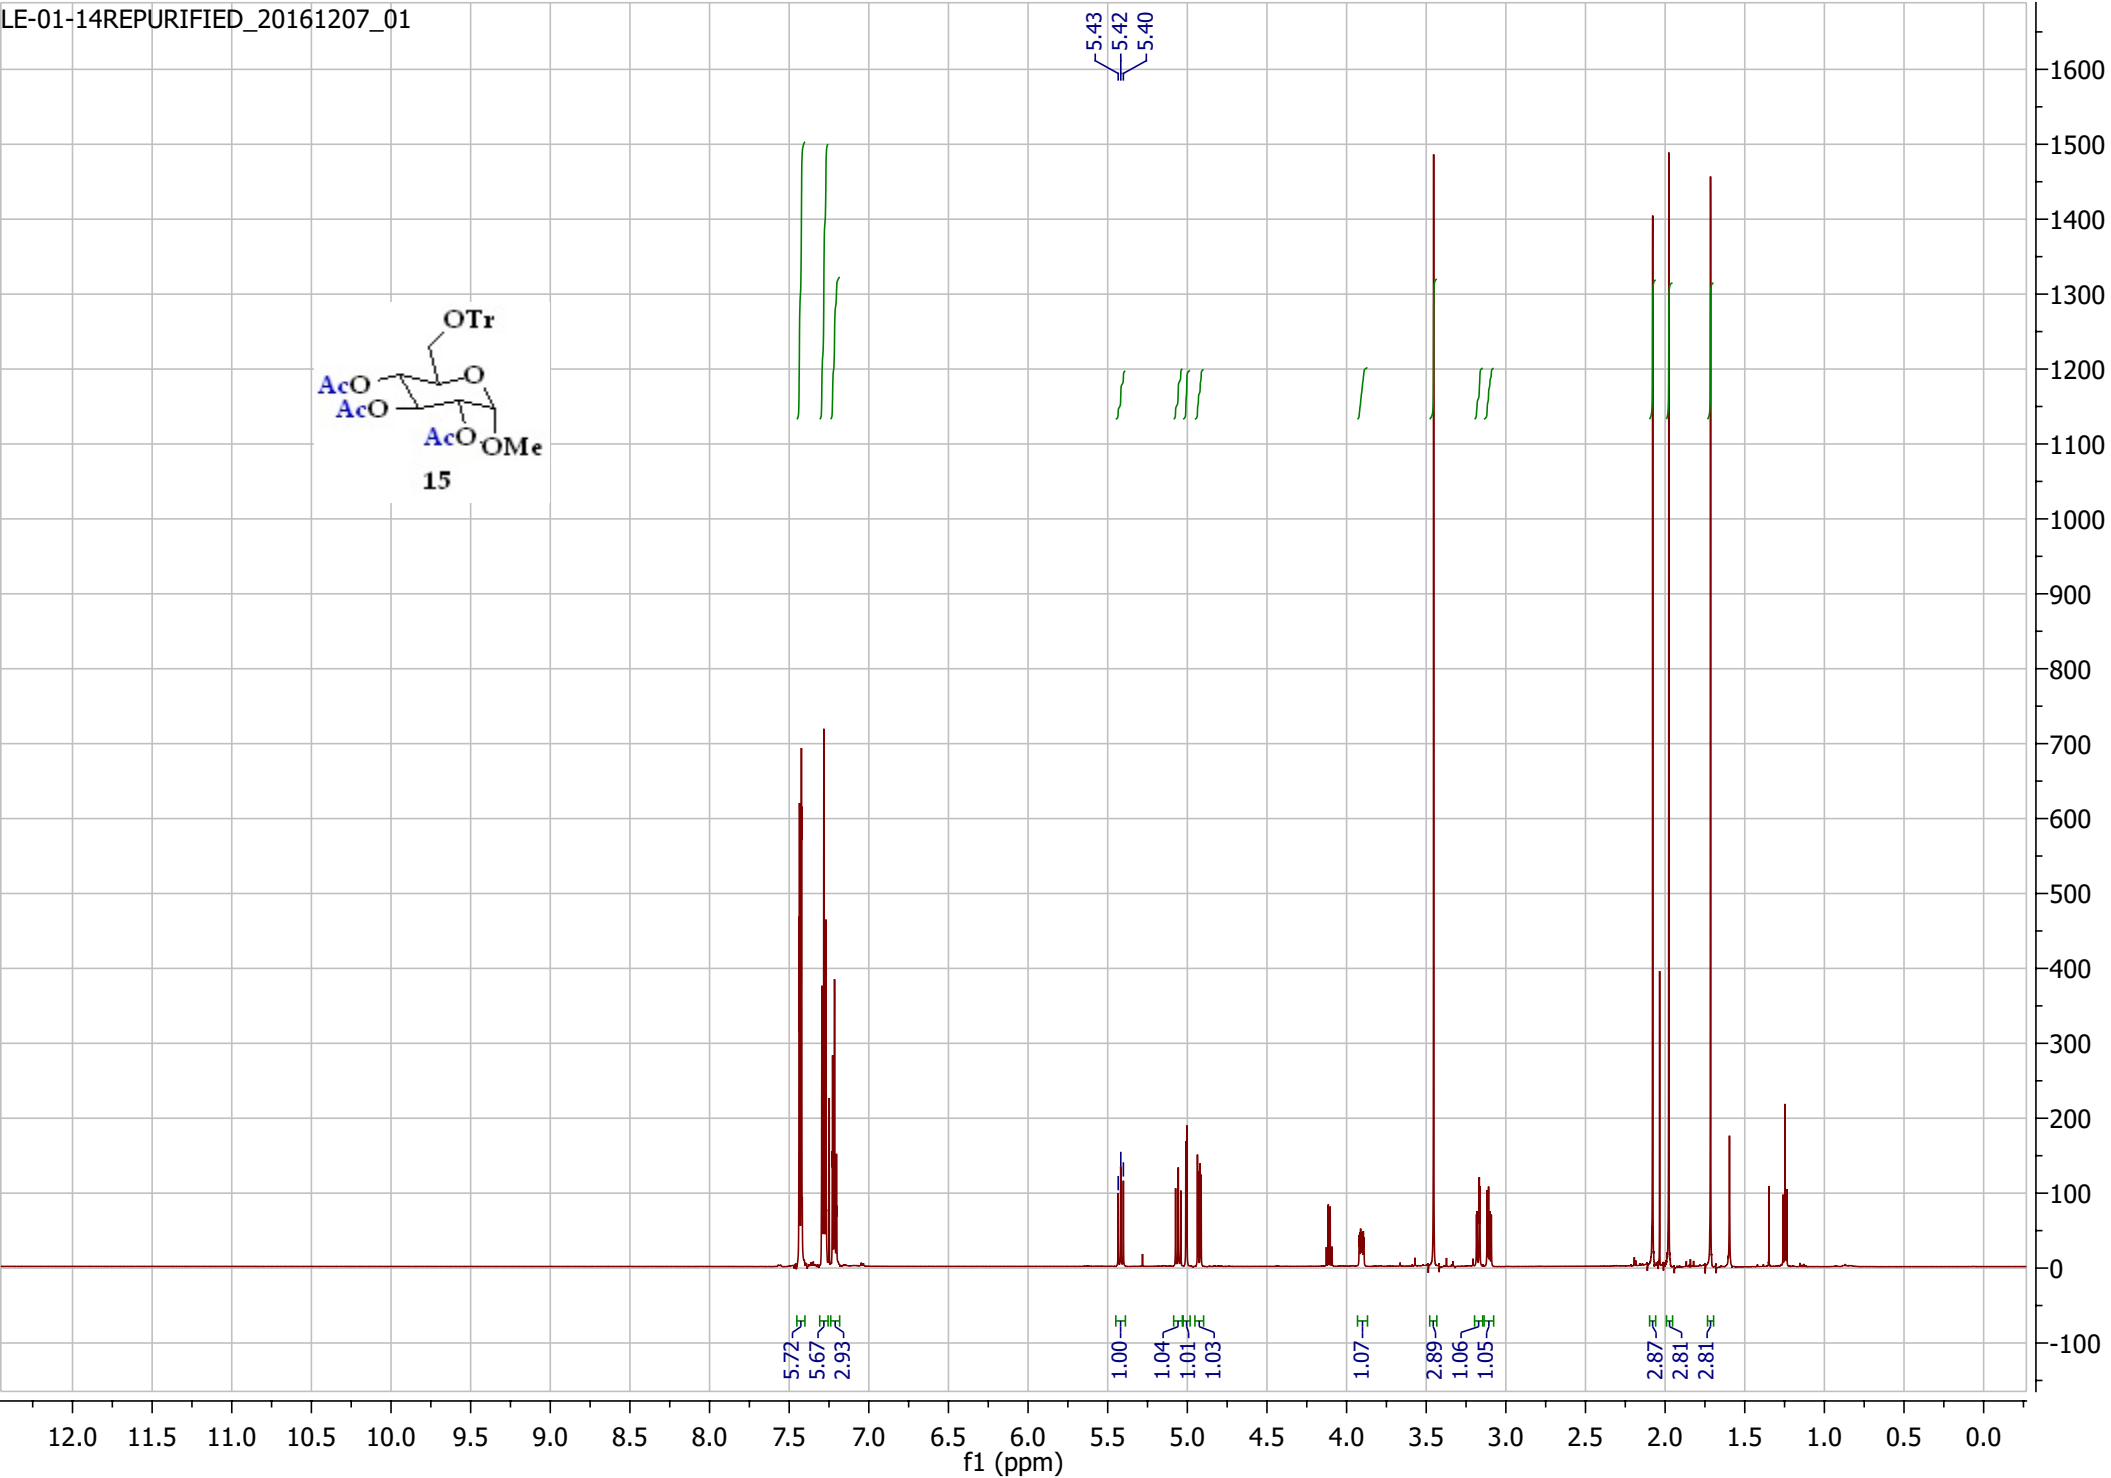



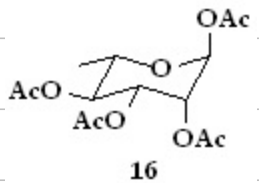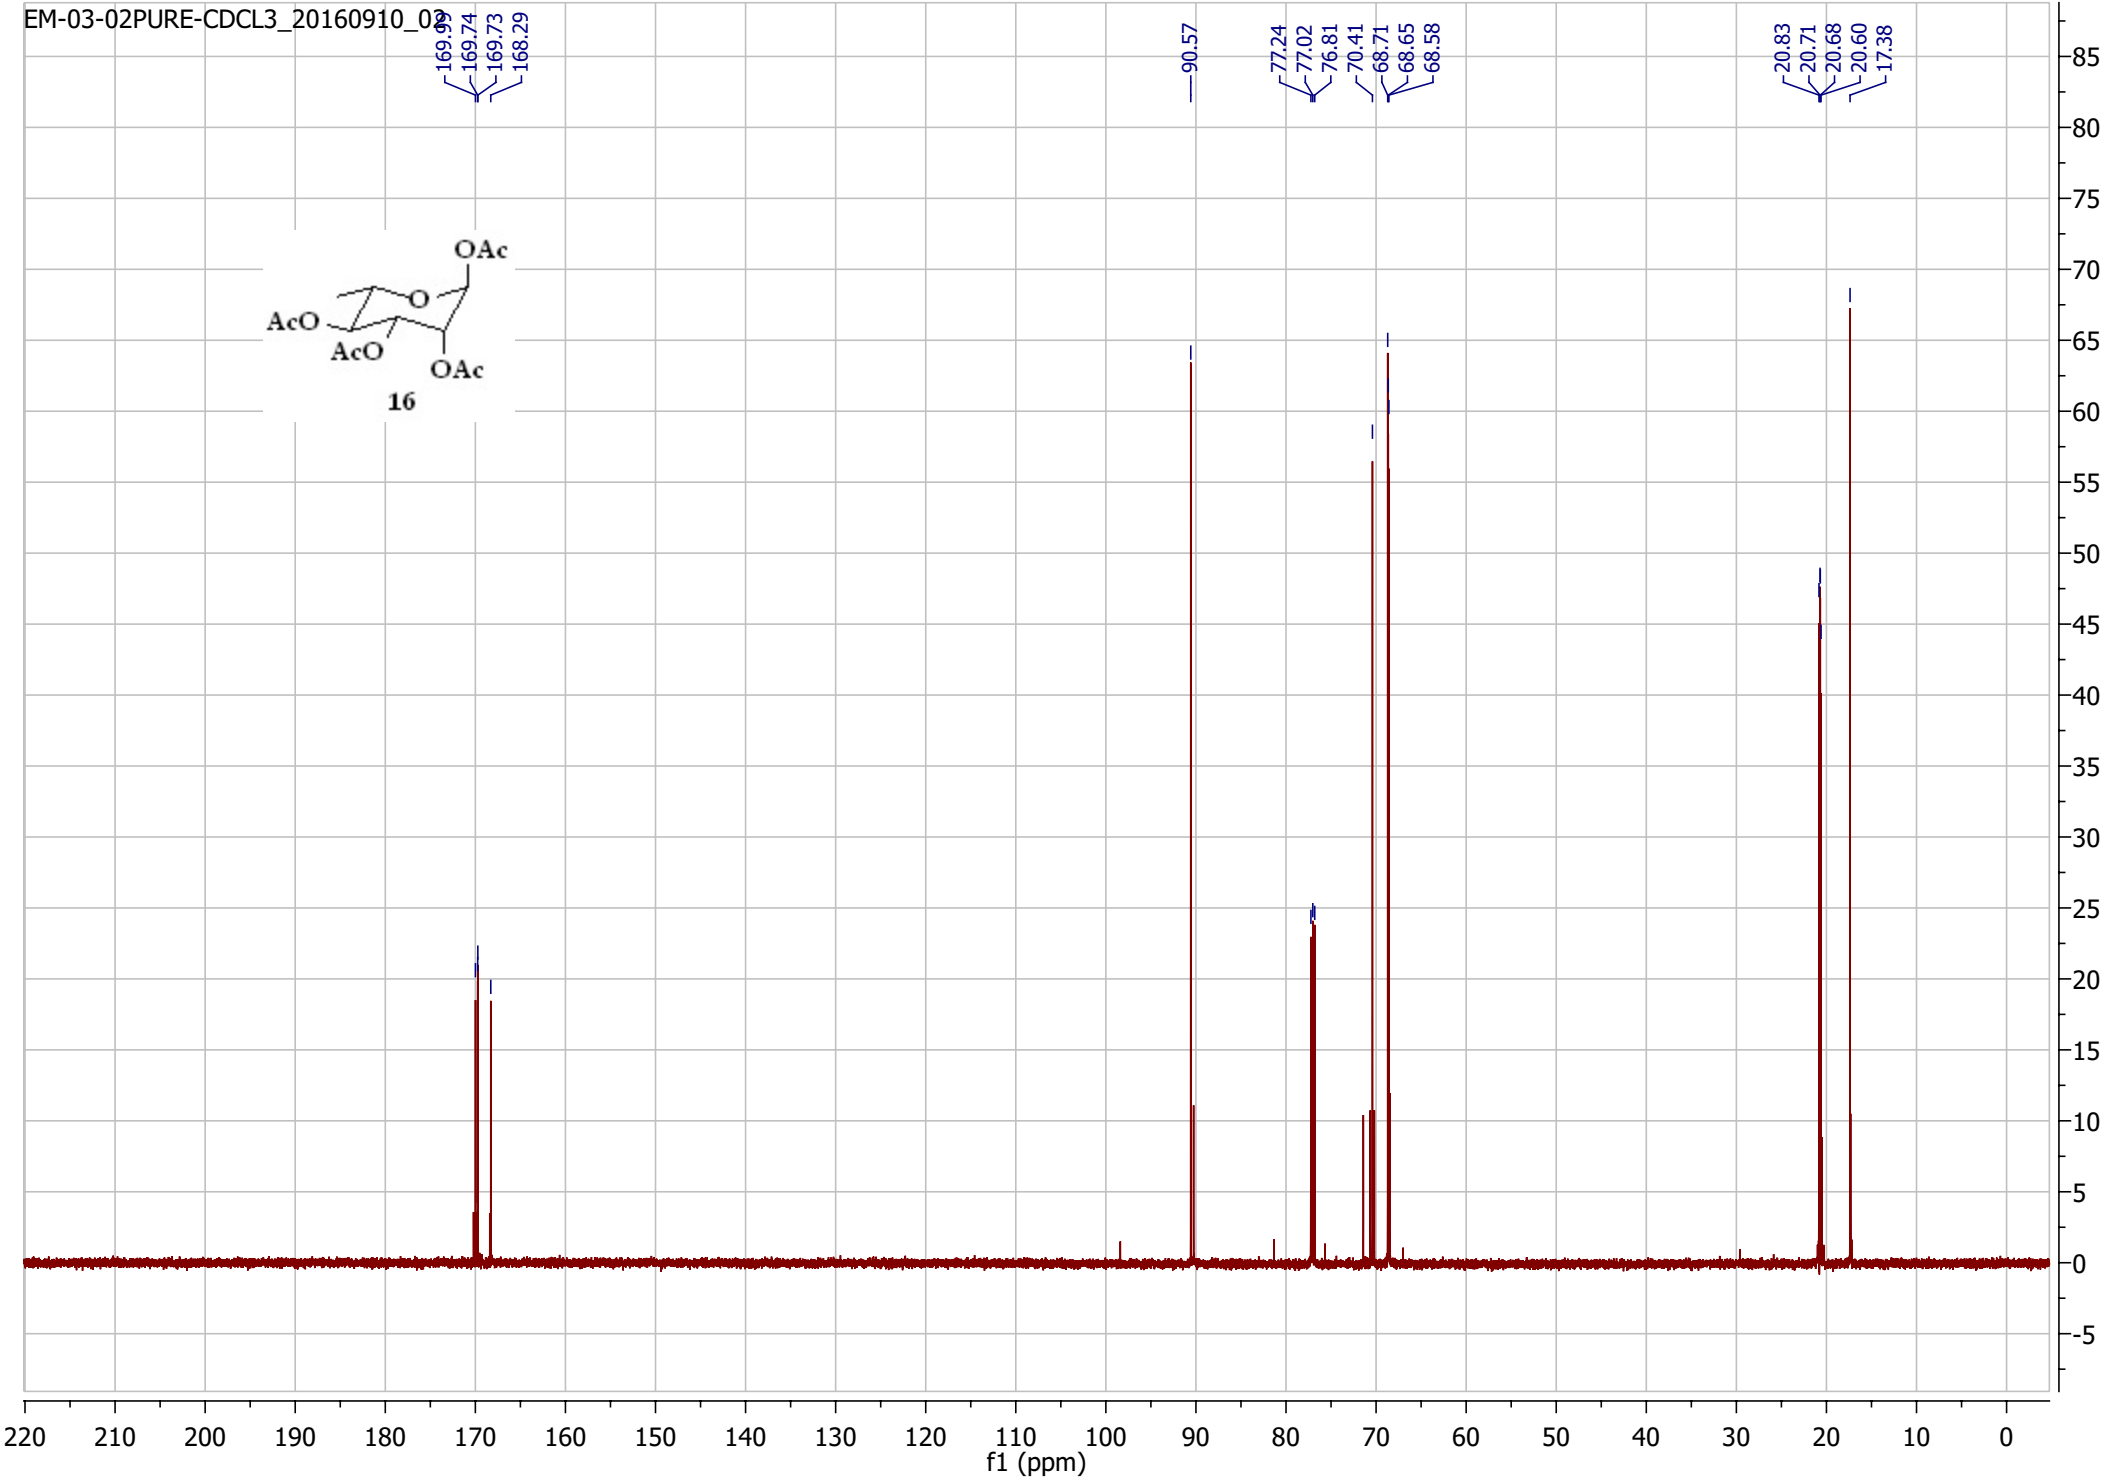

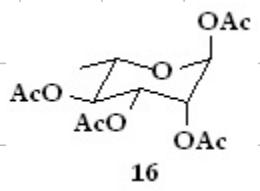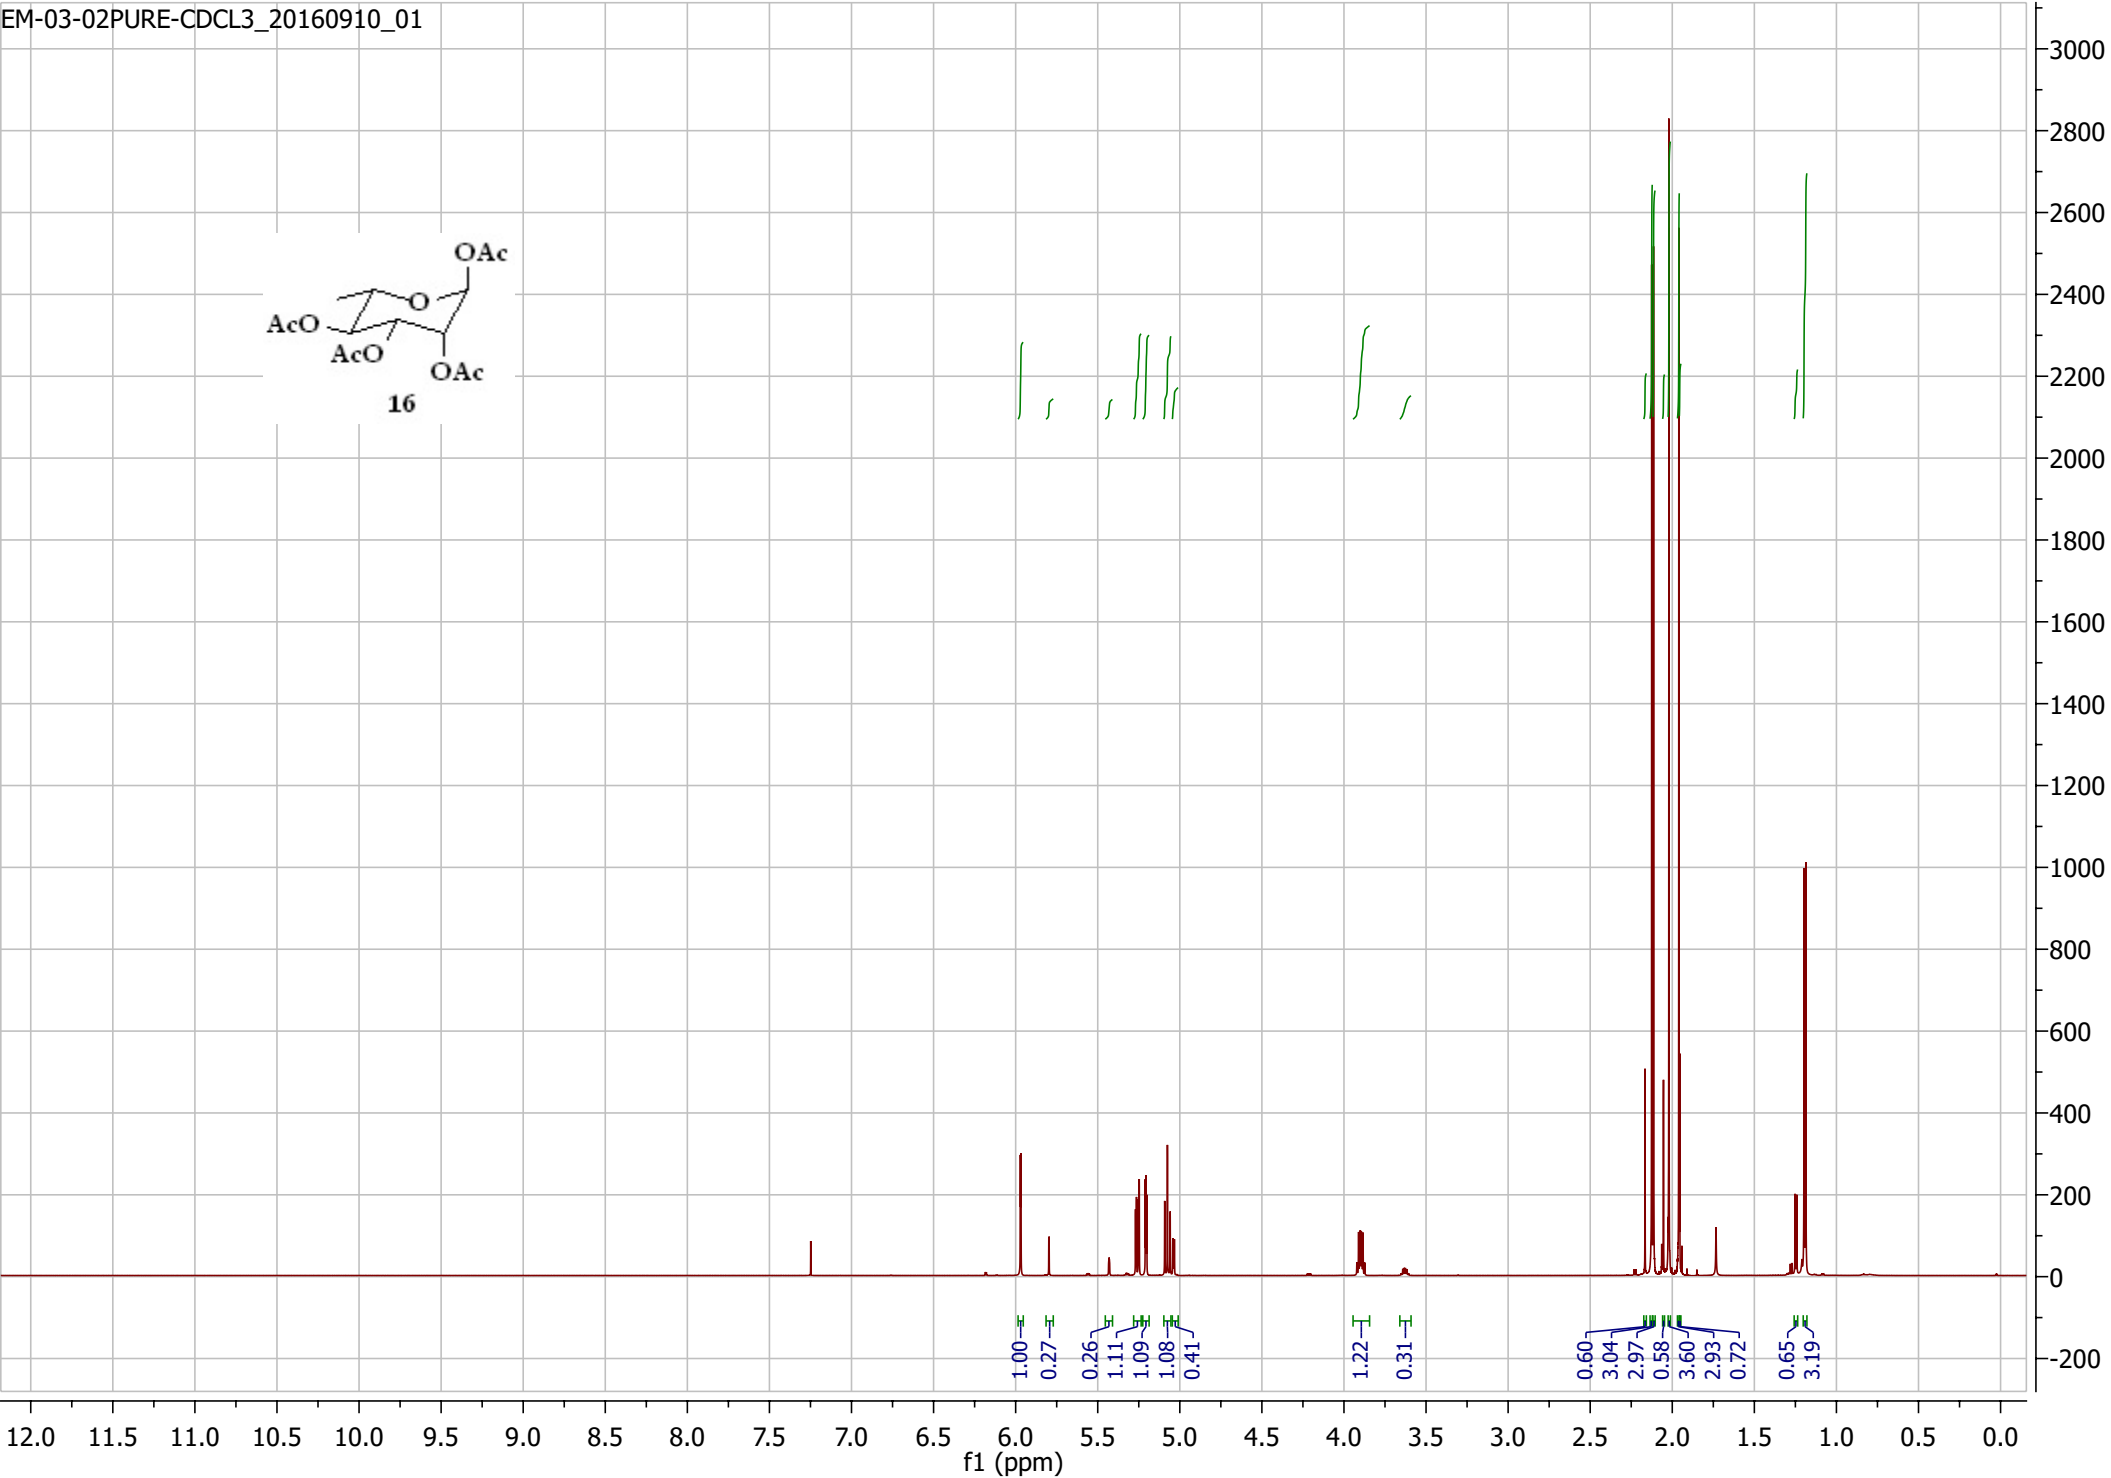

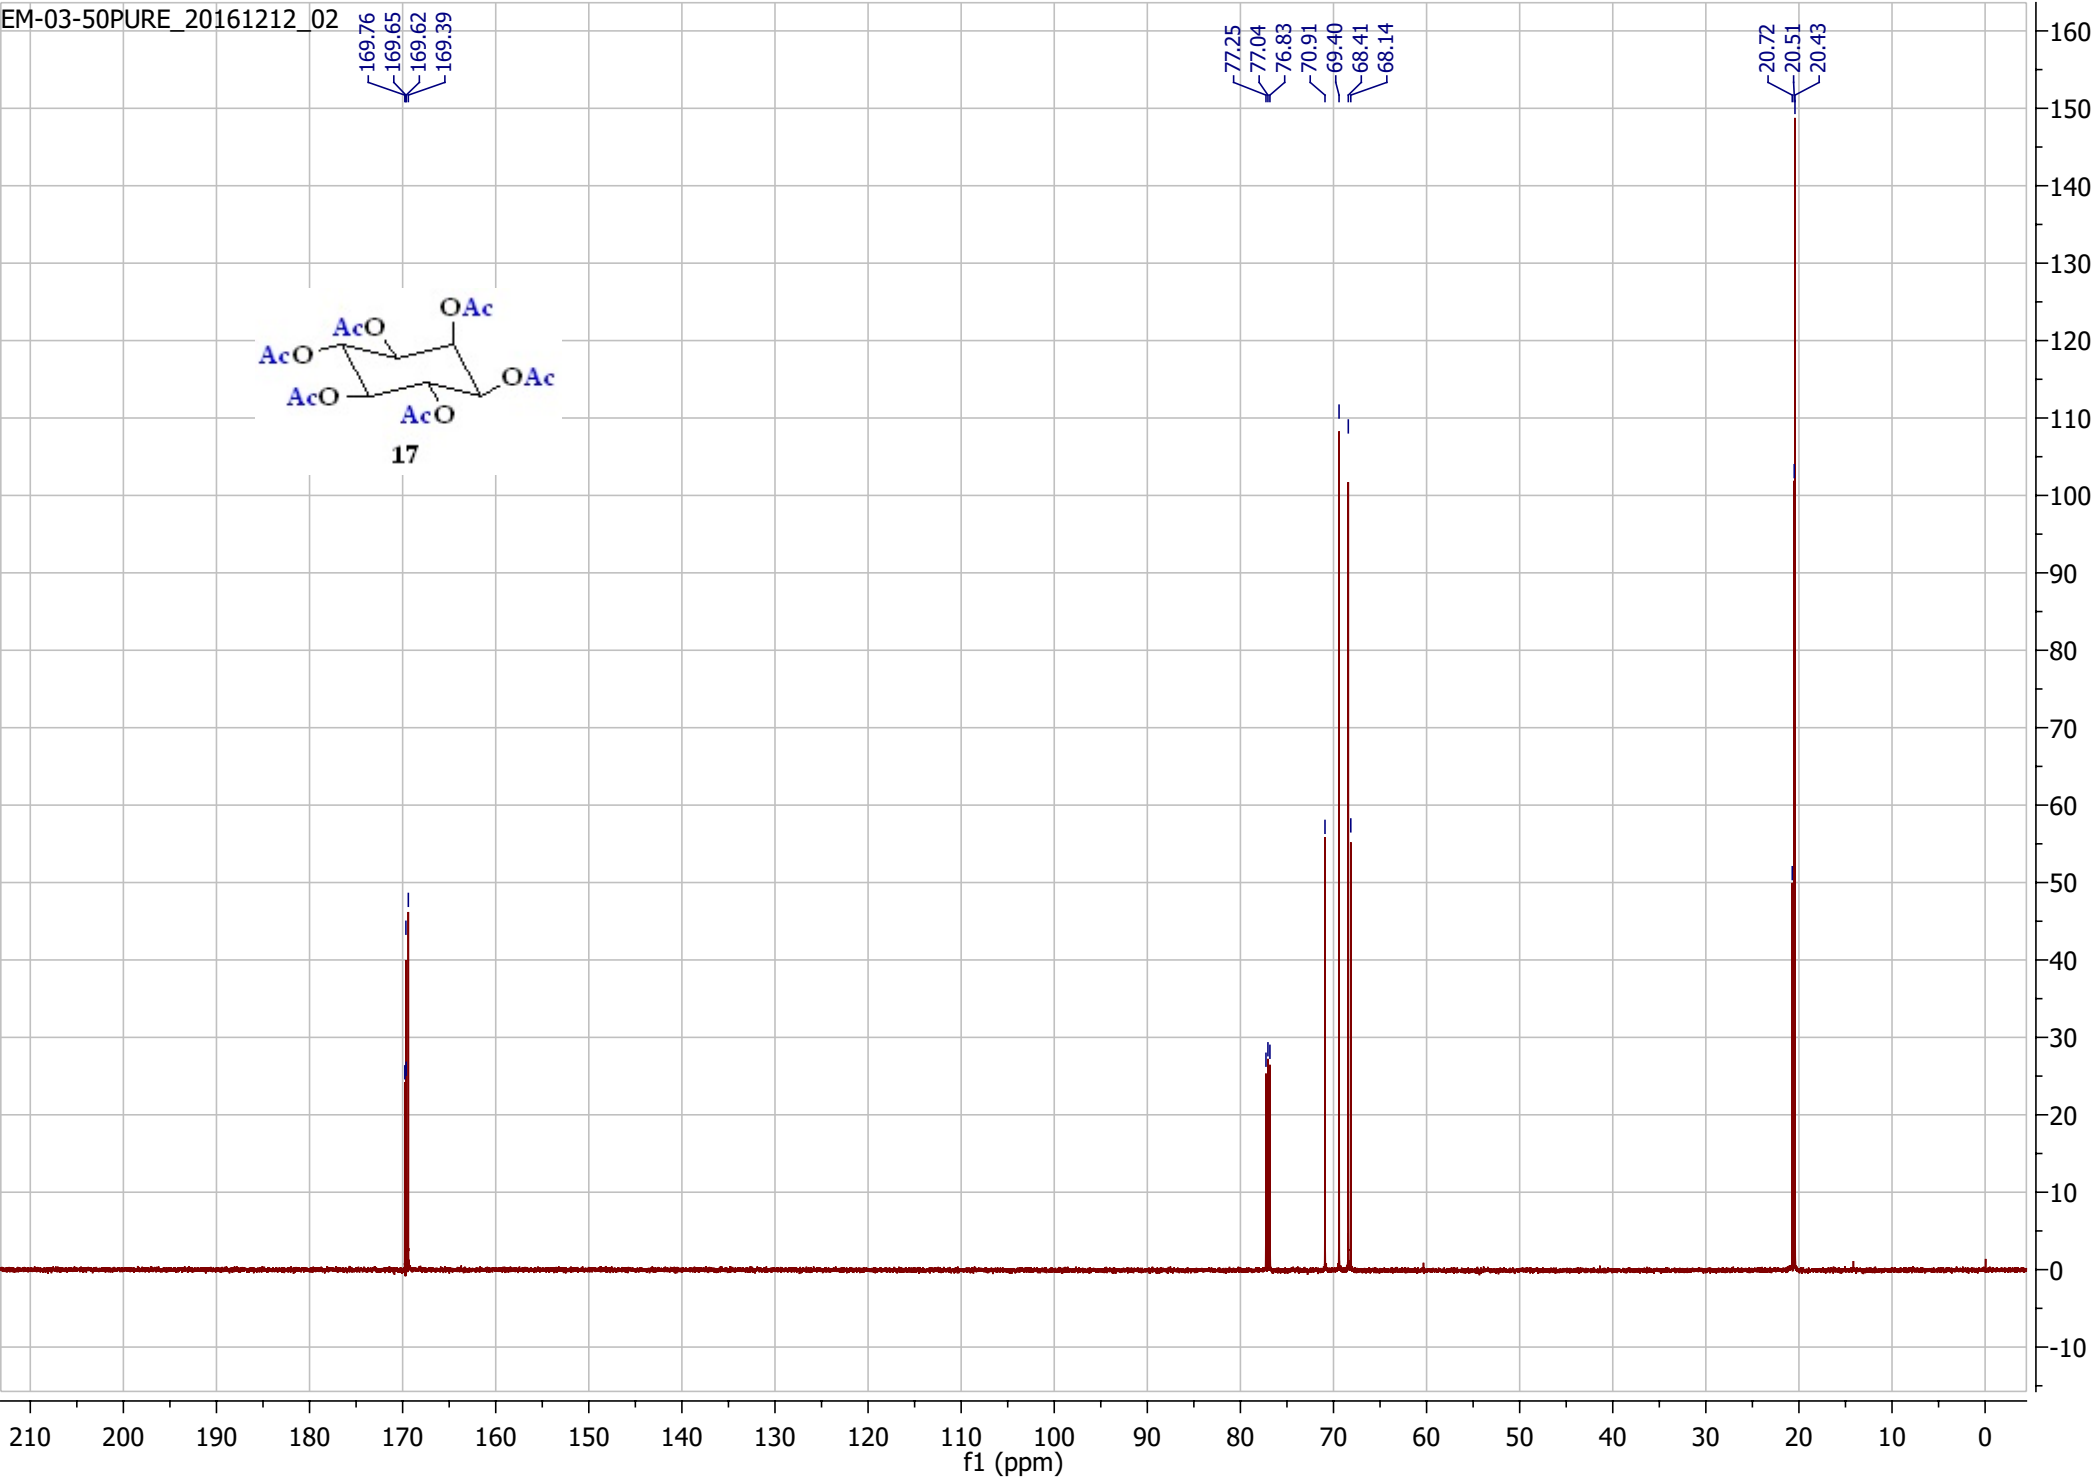

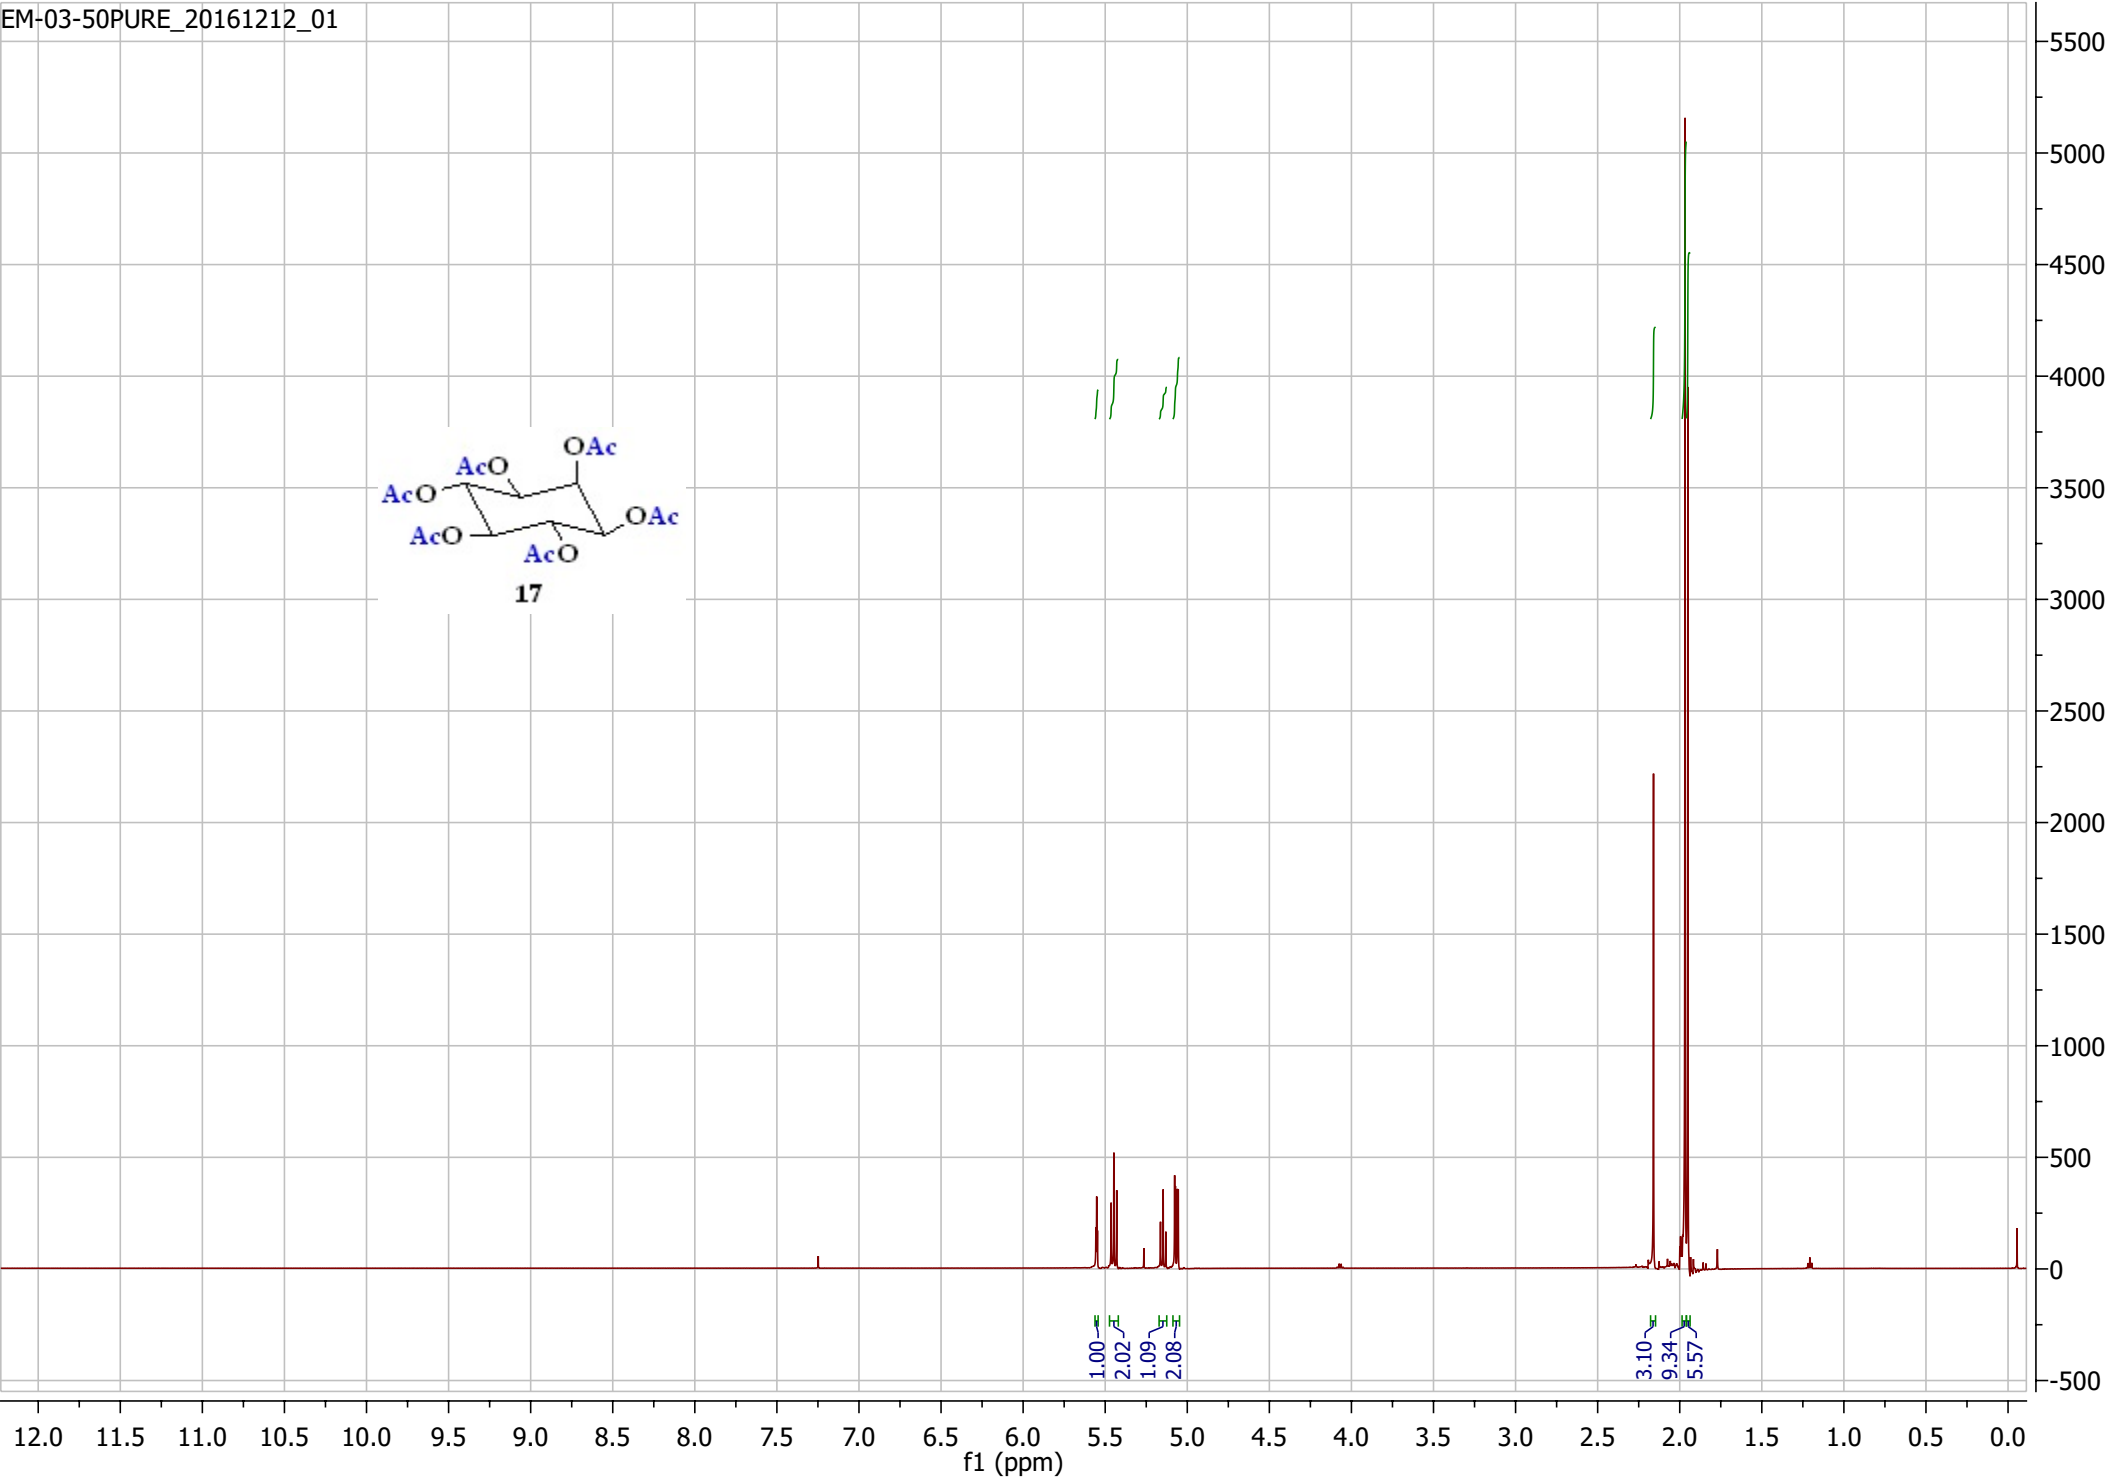

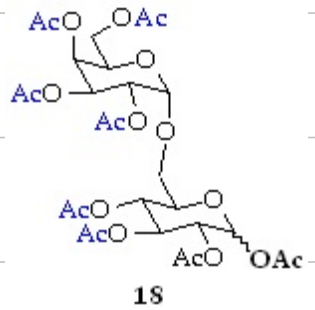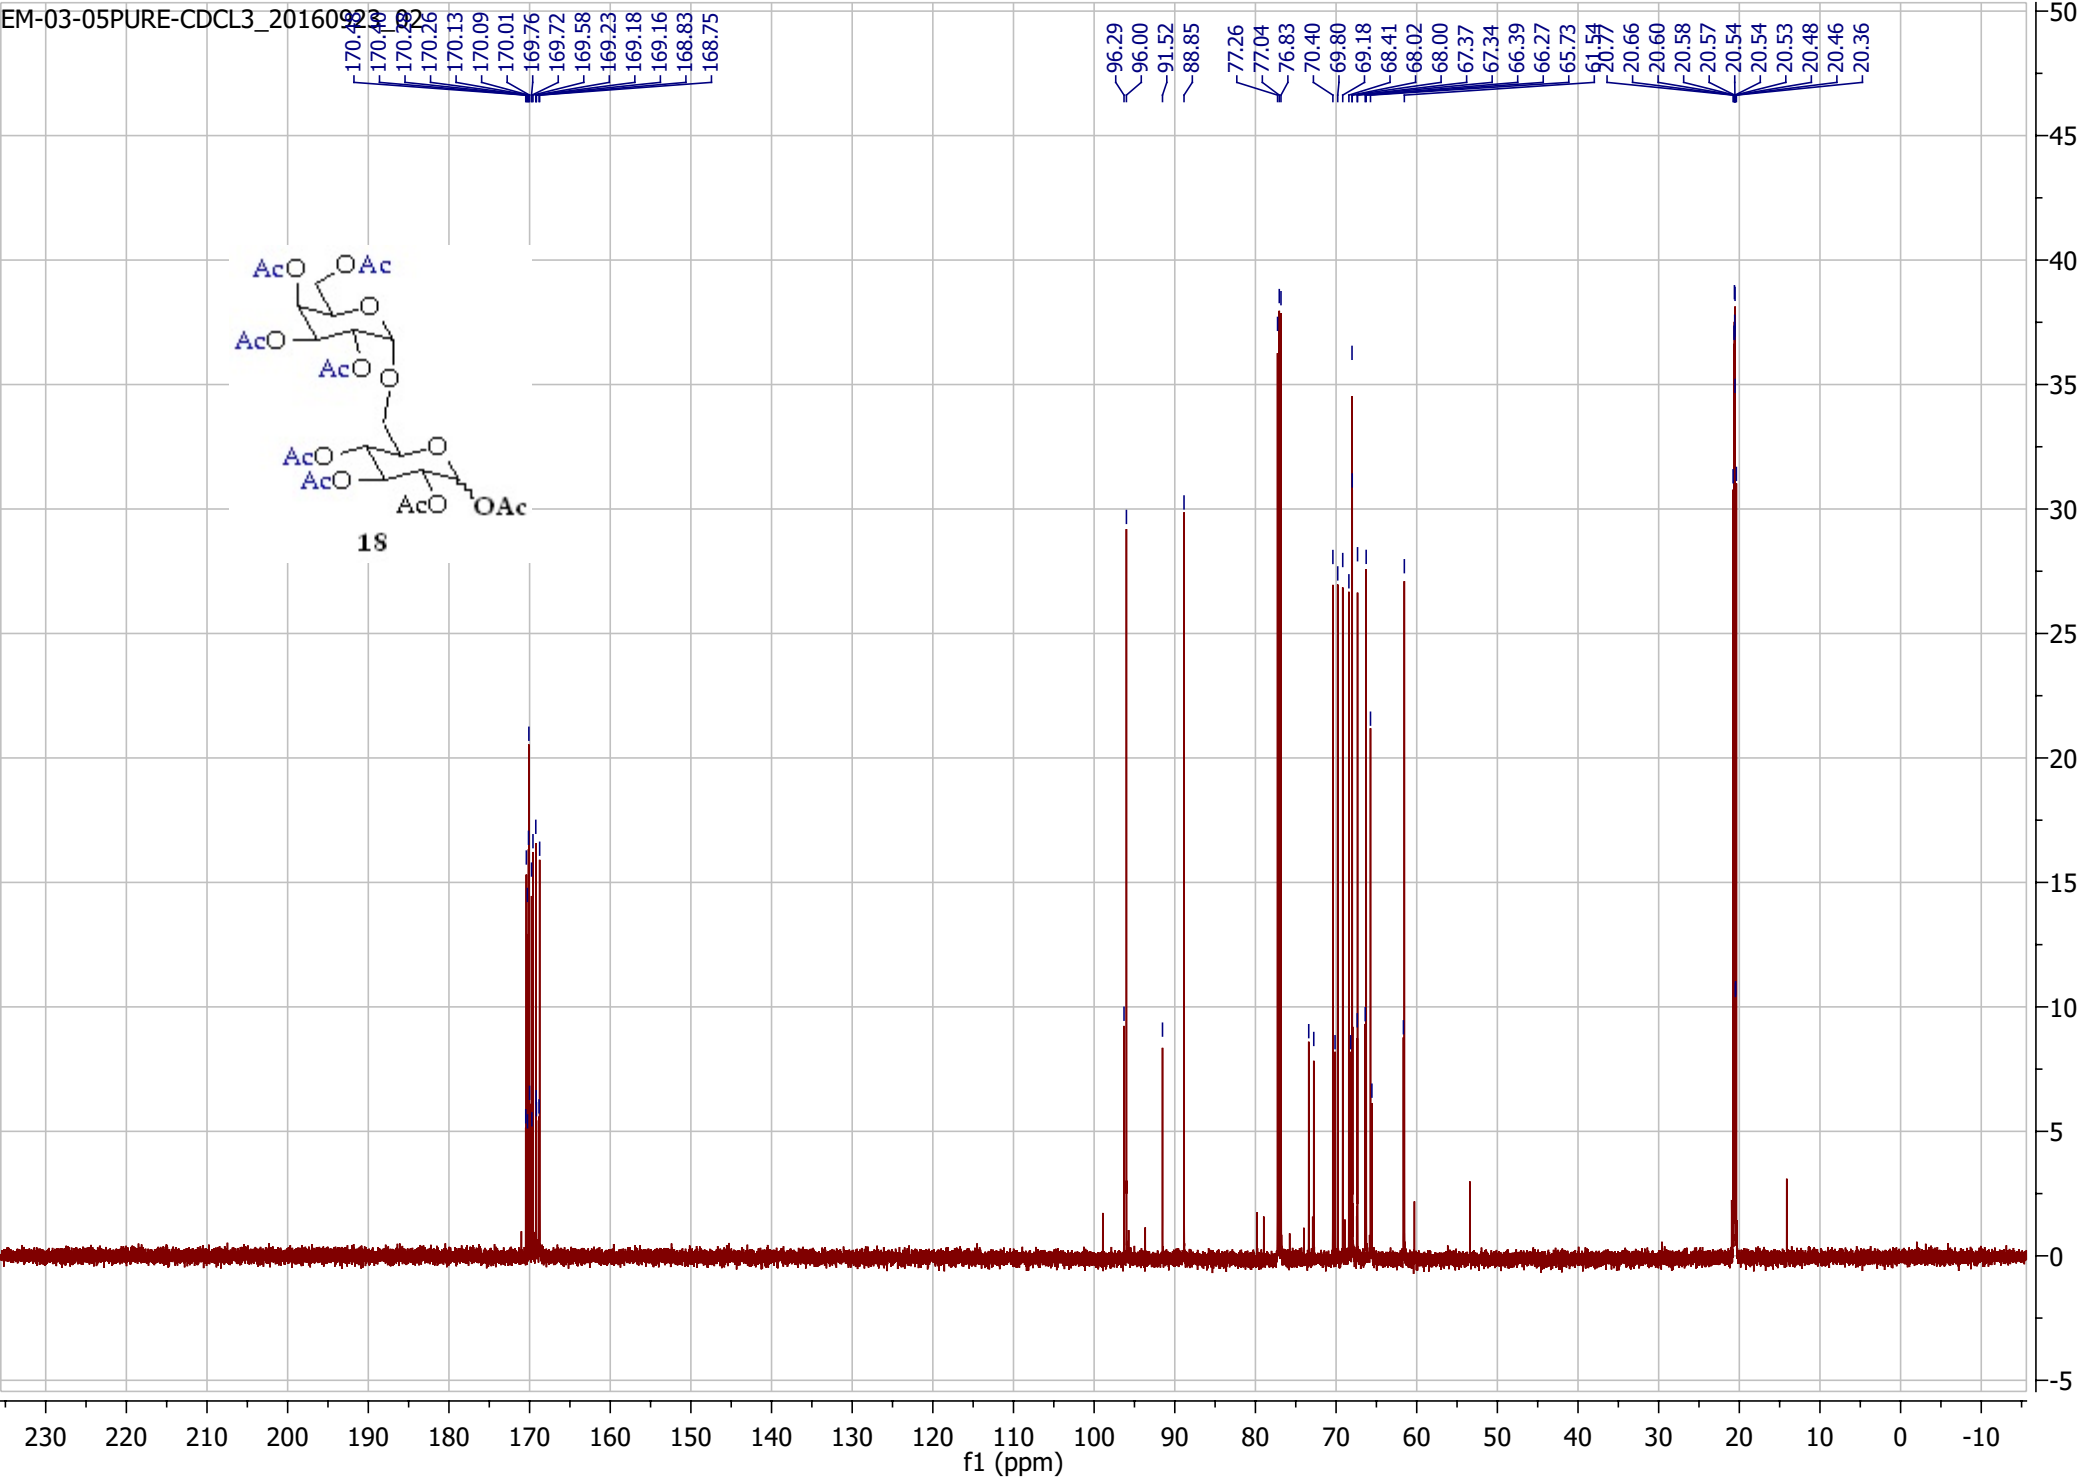

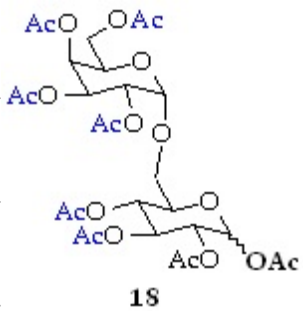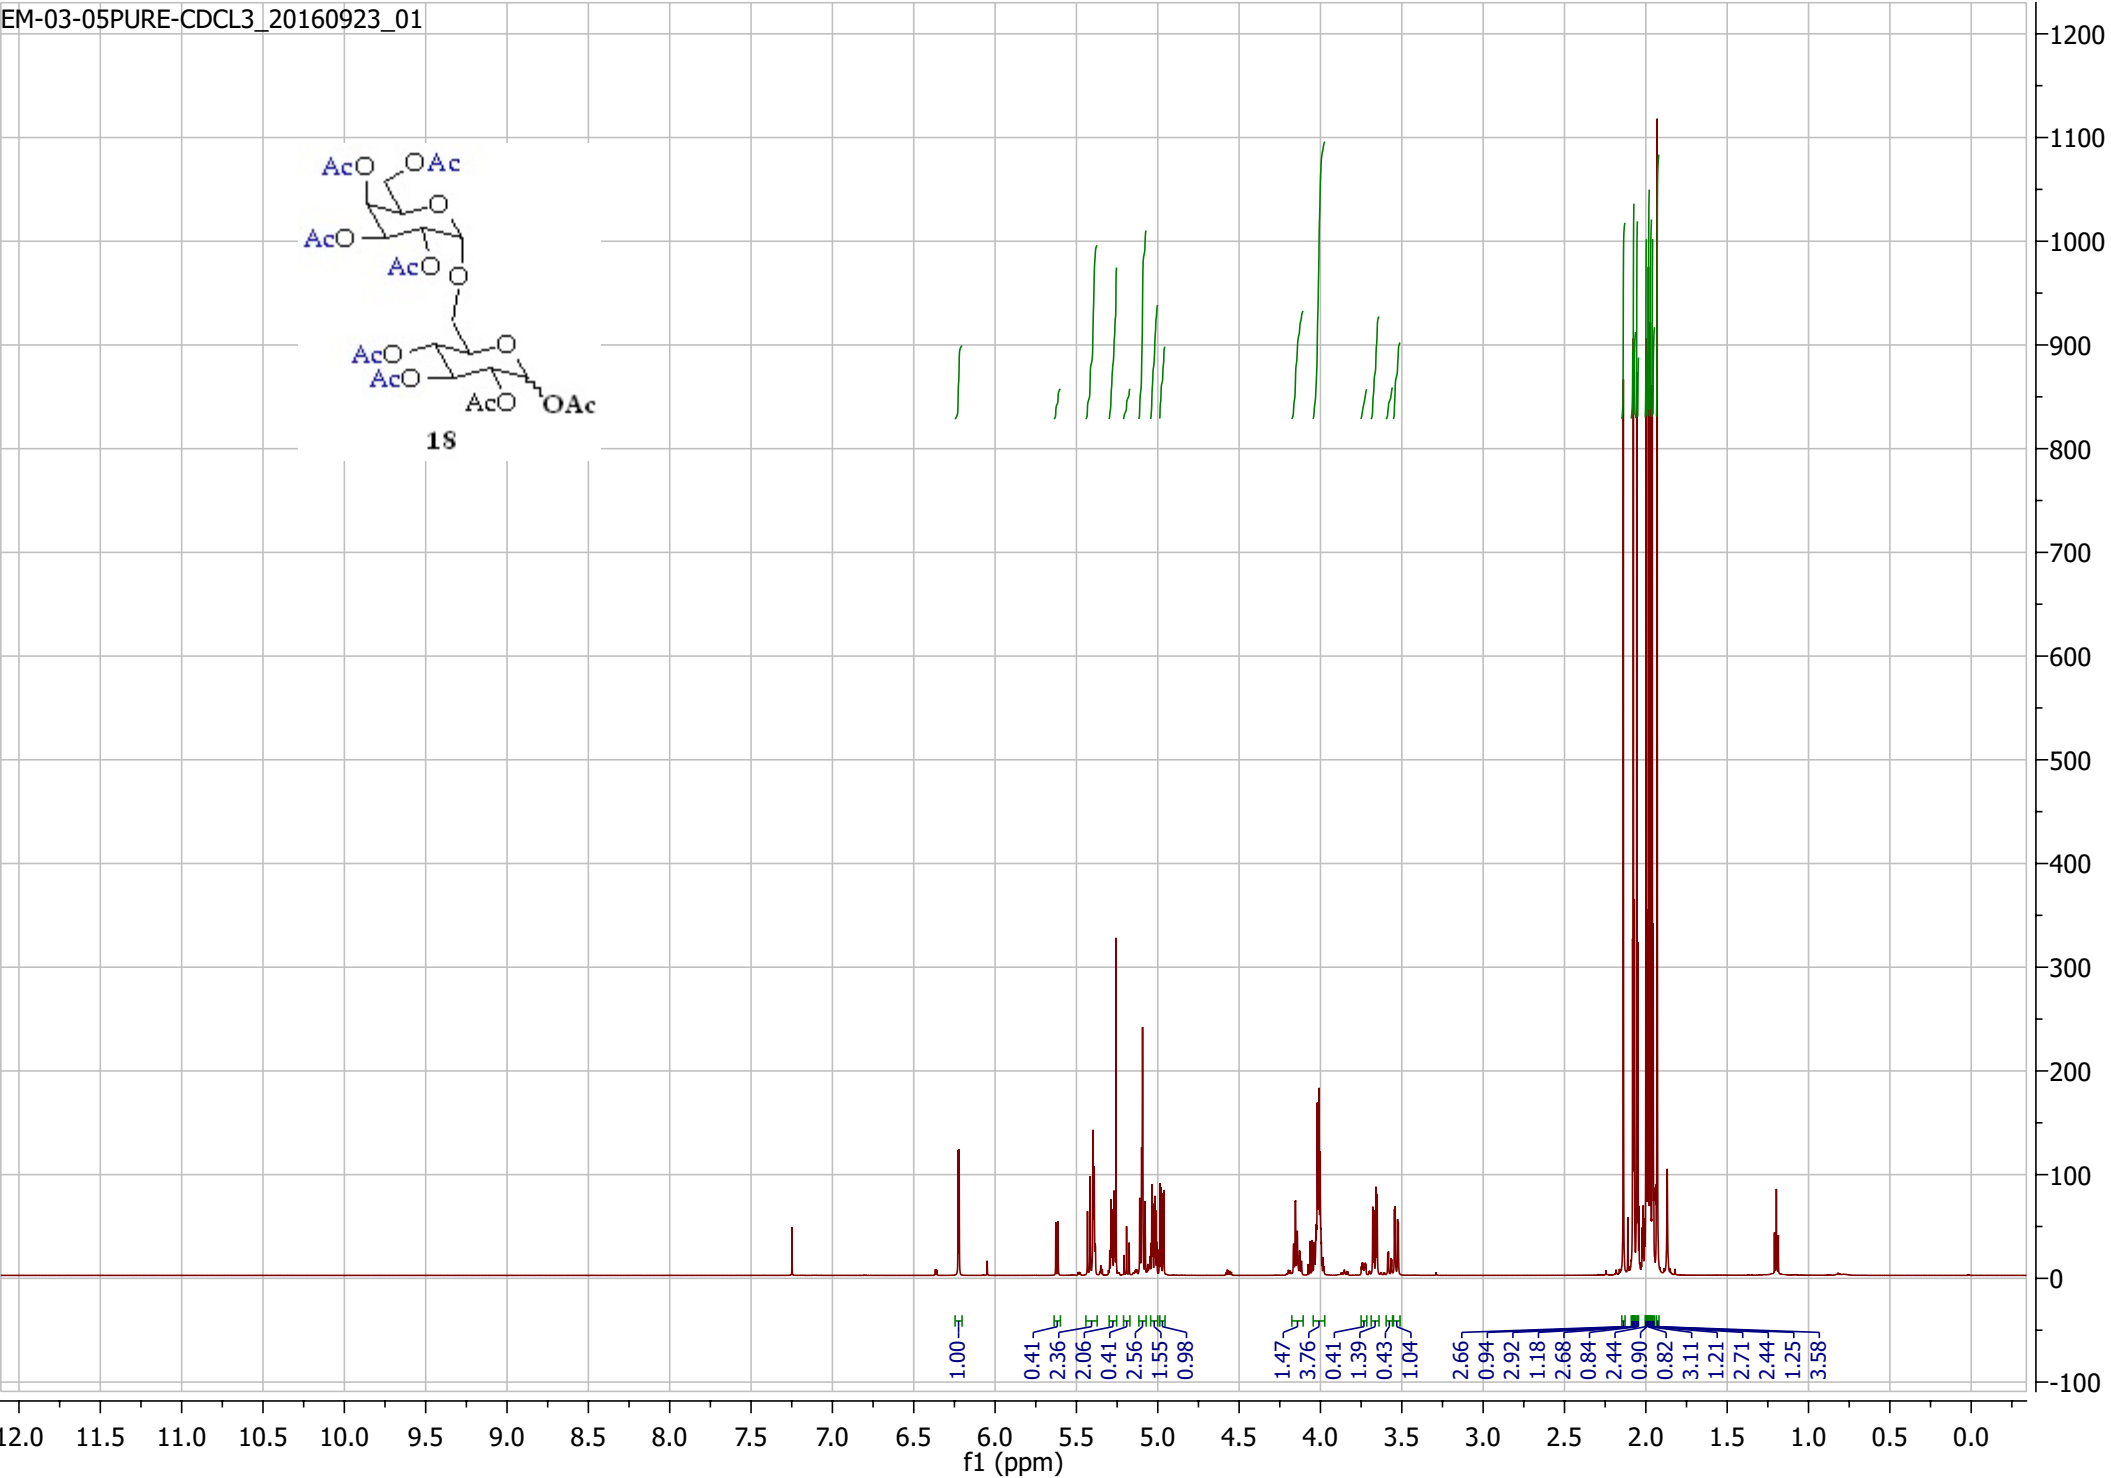

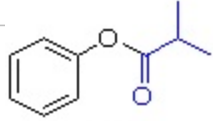

19

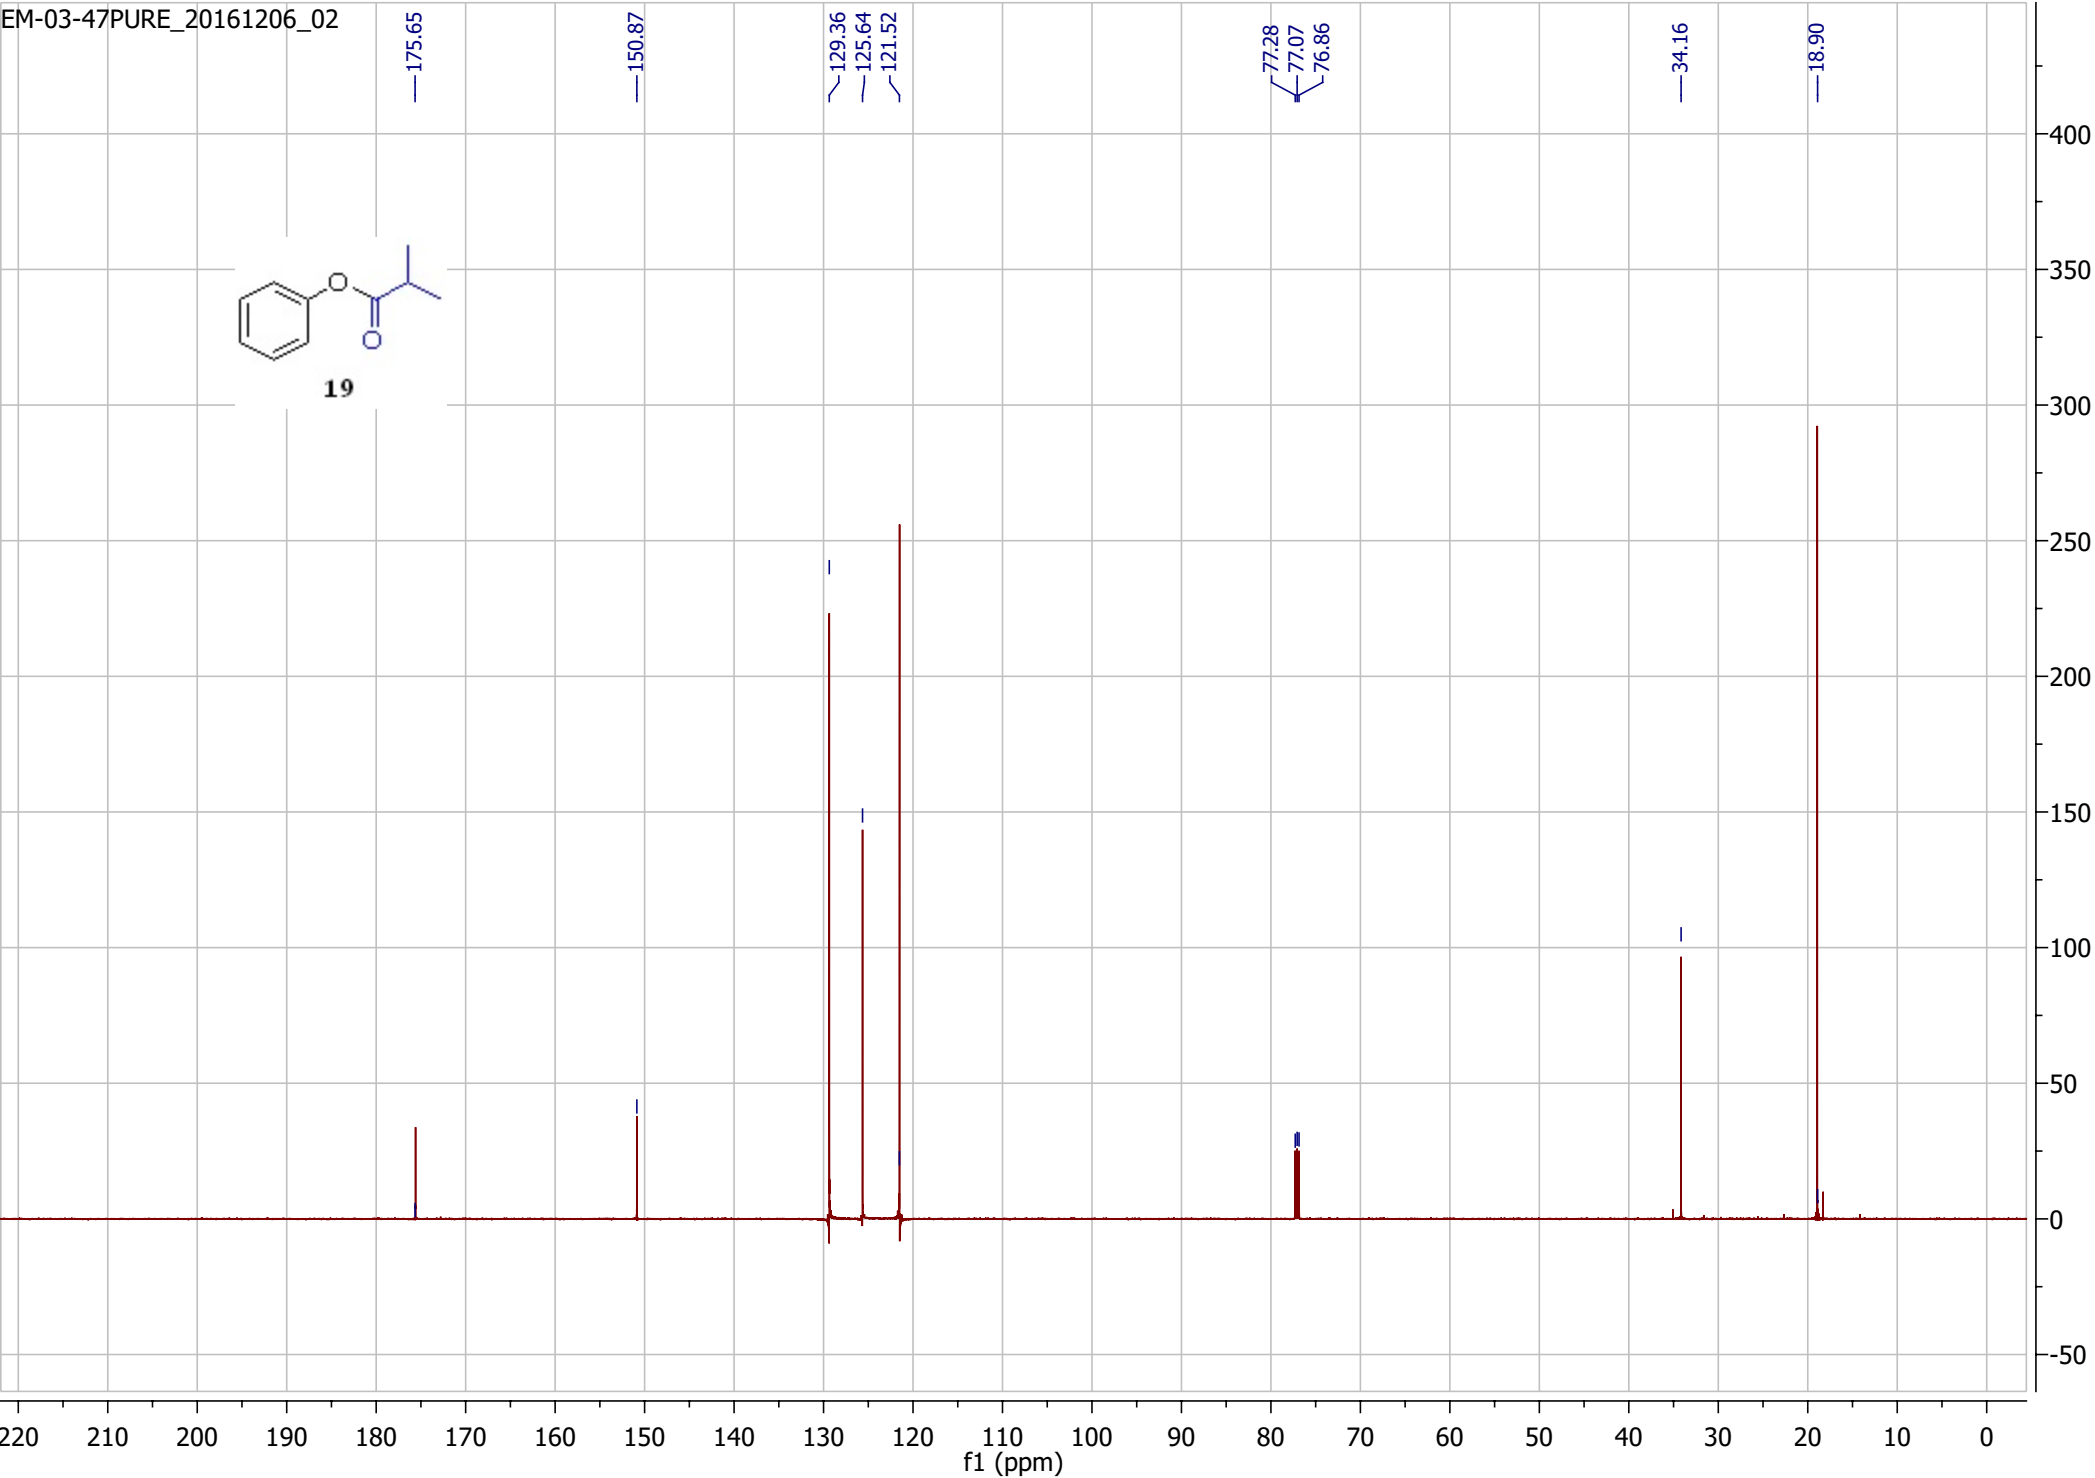

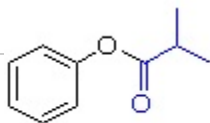

19

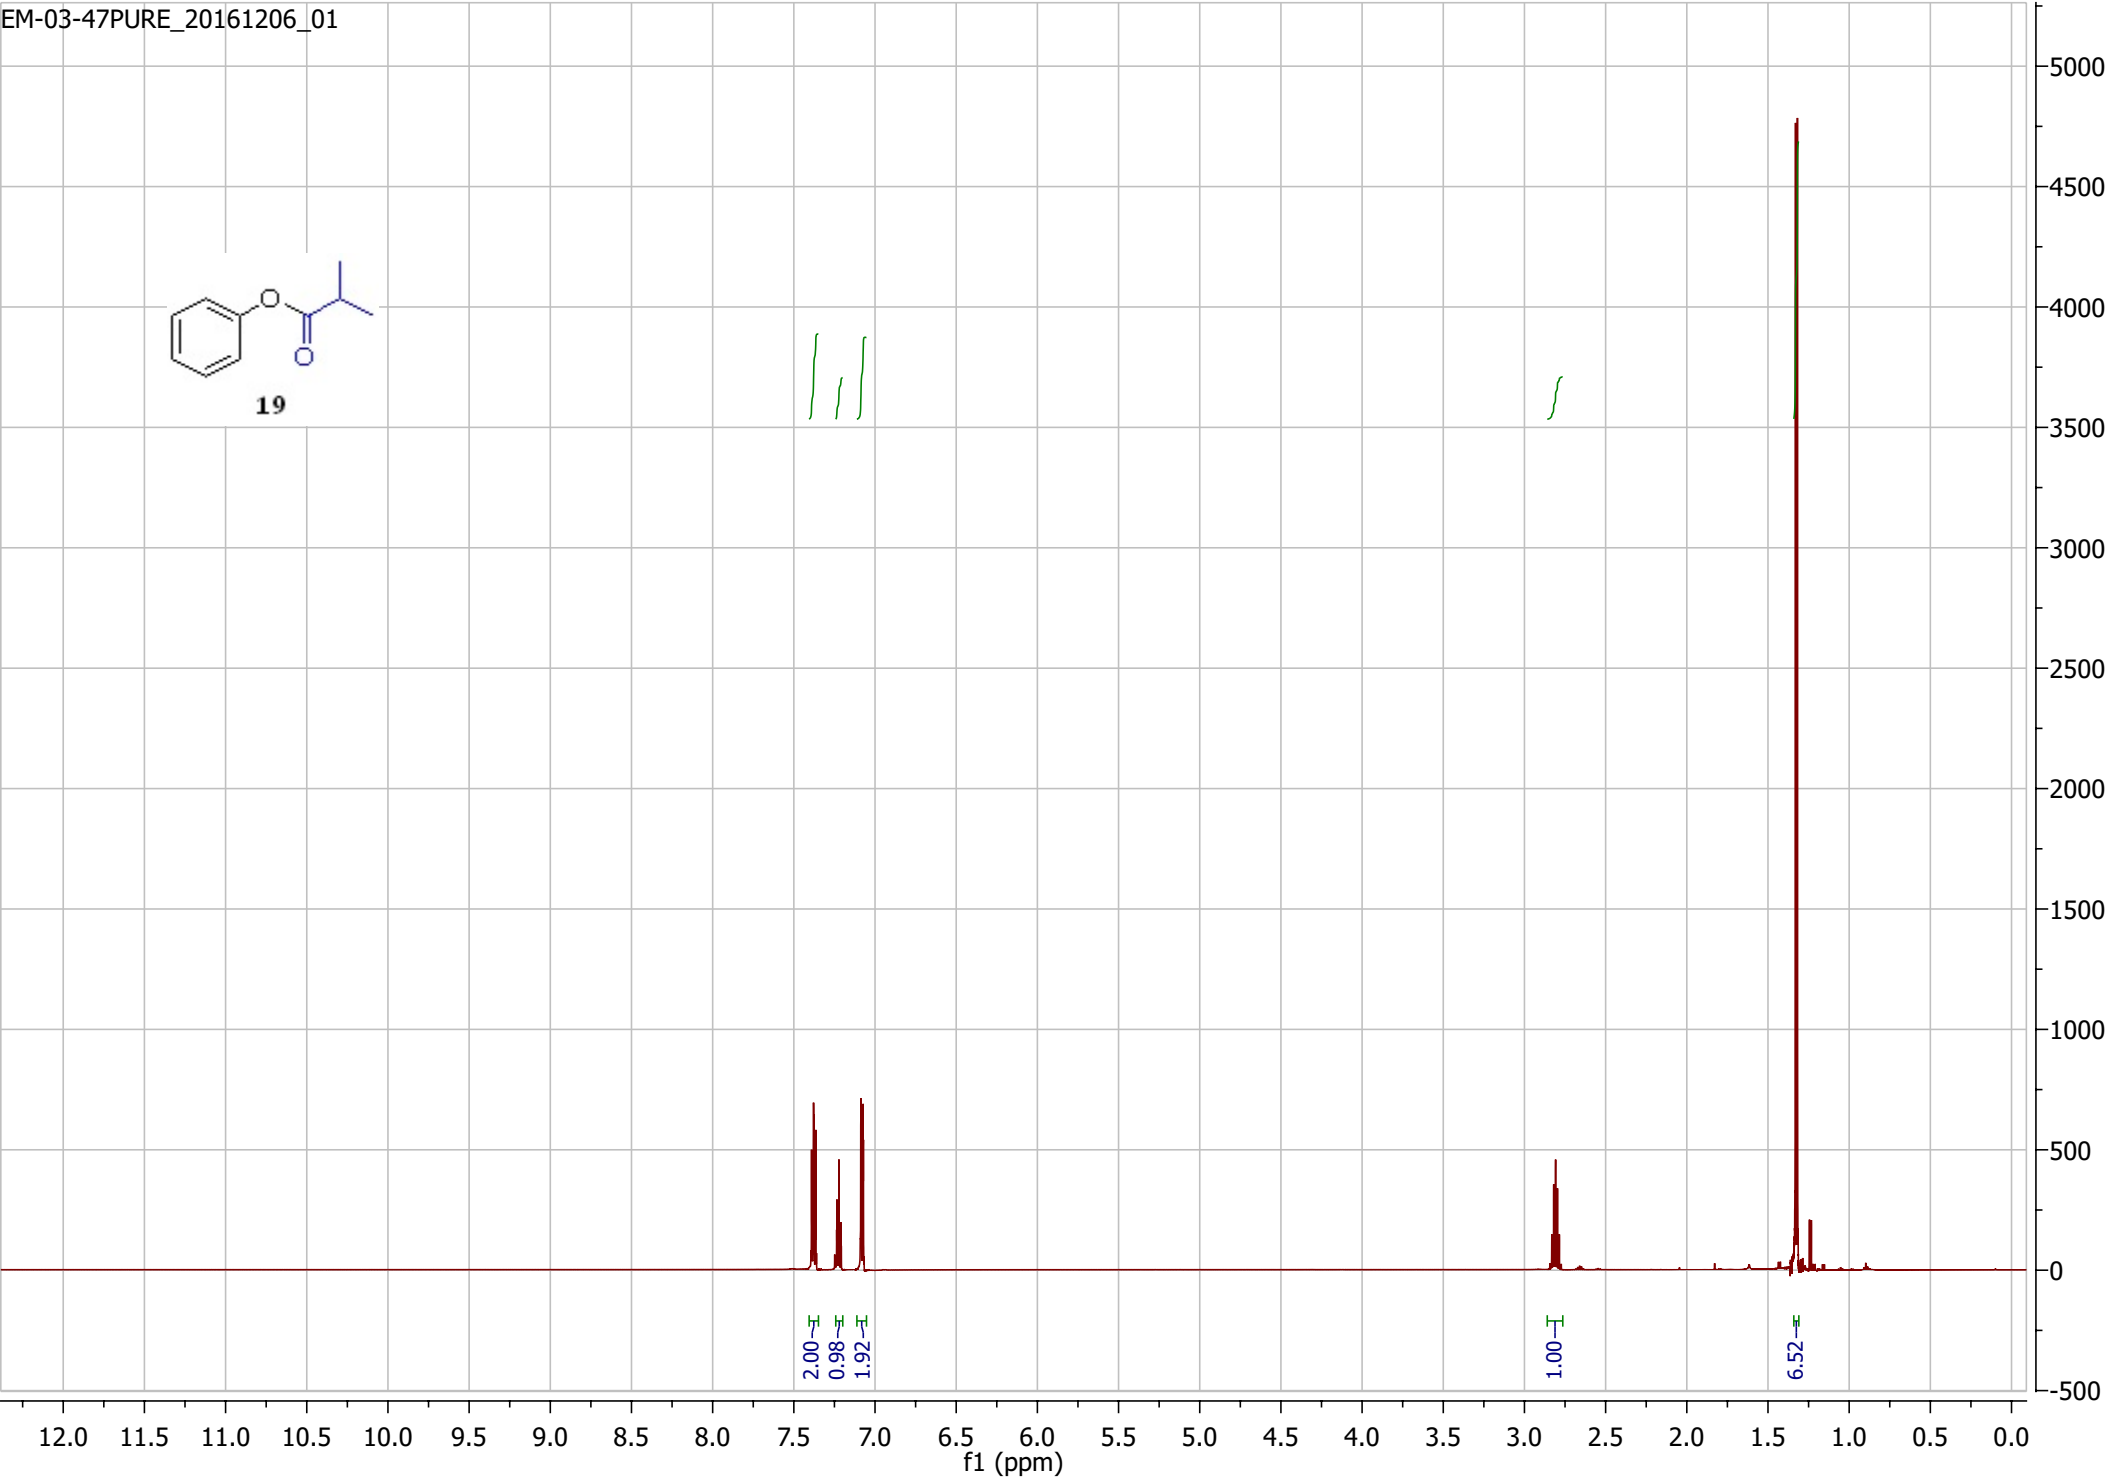



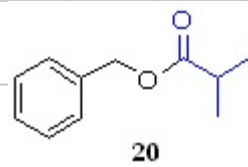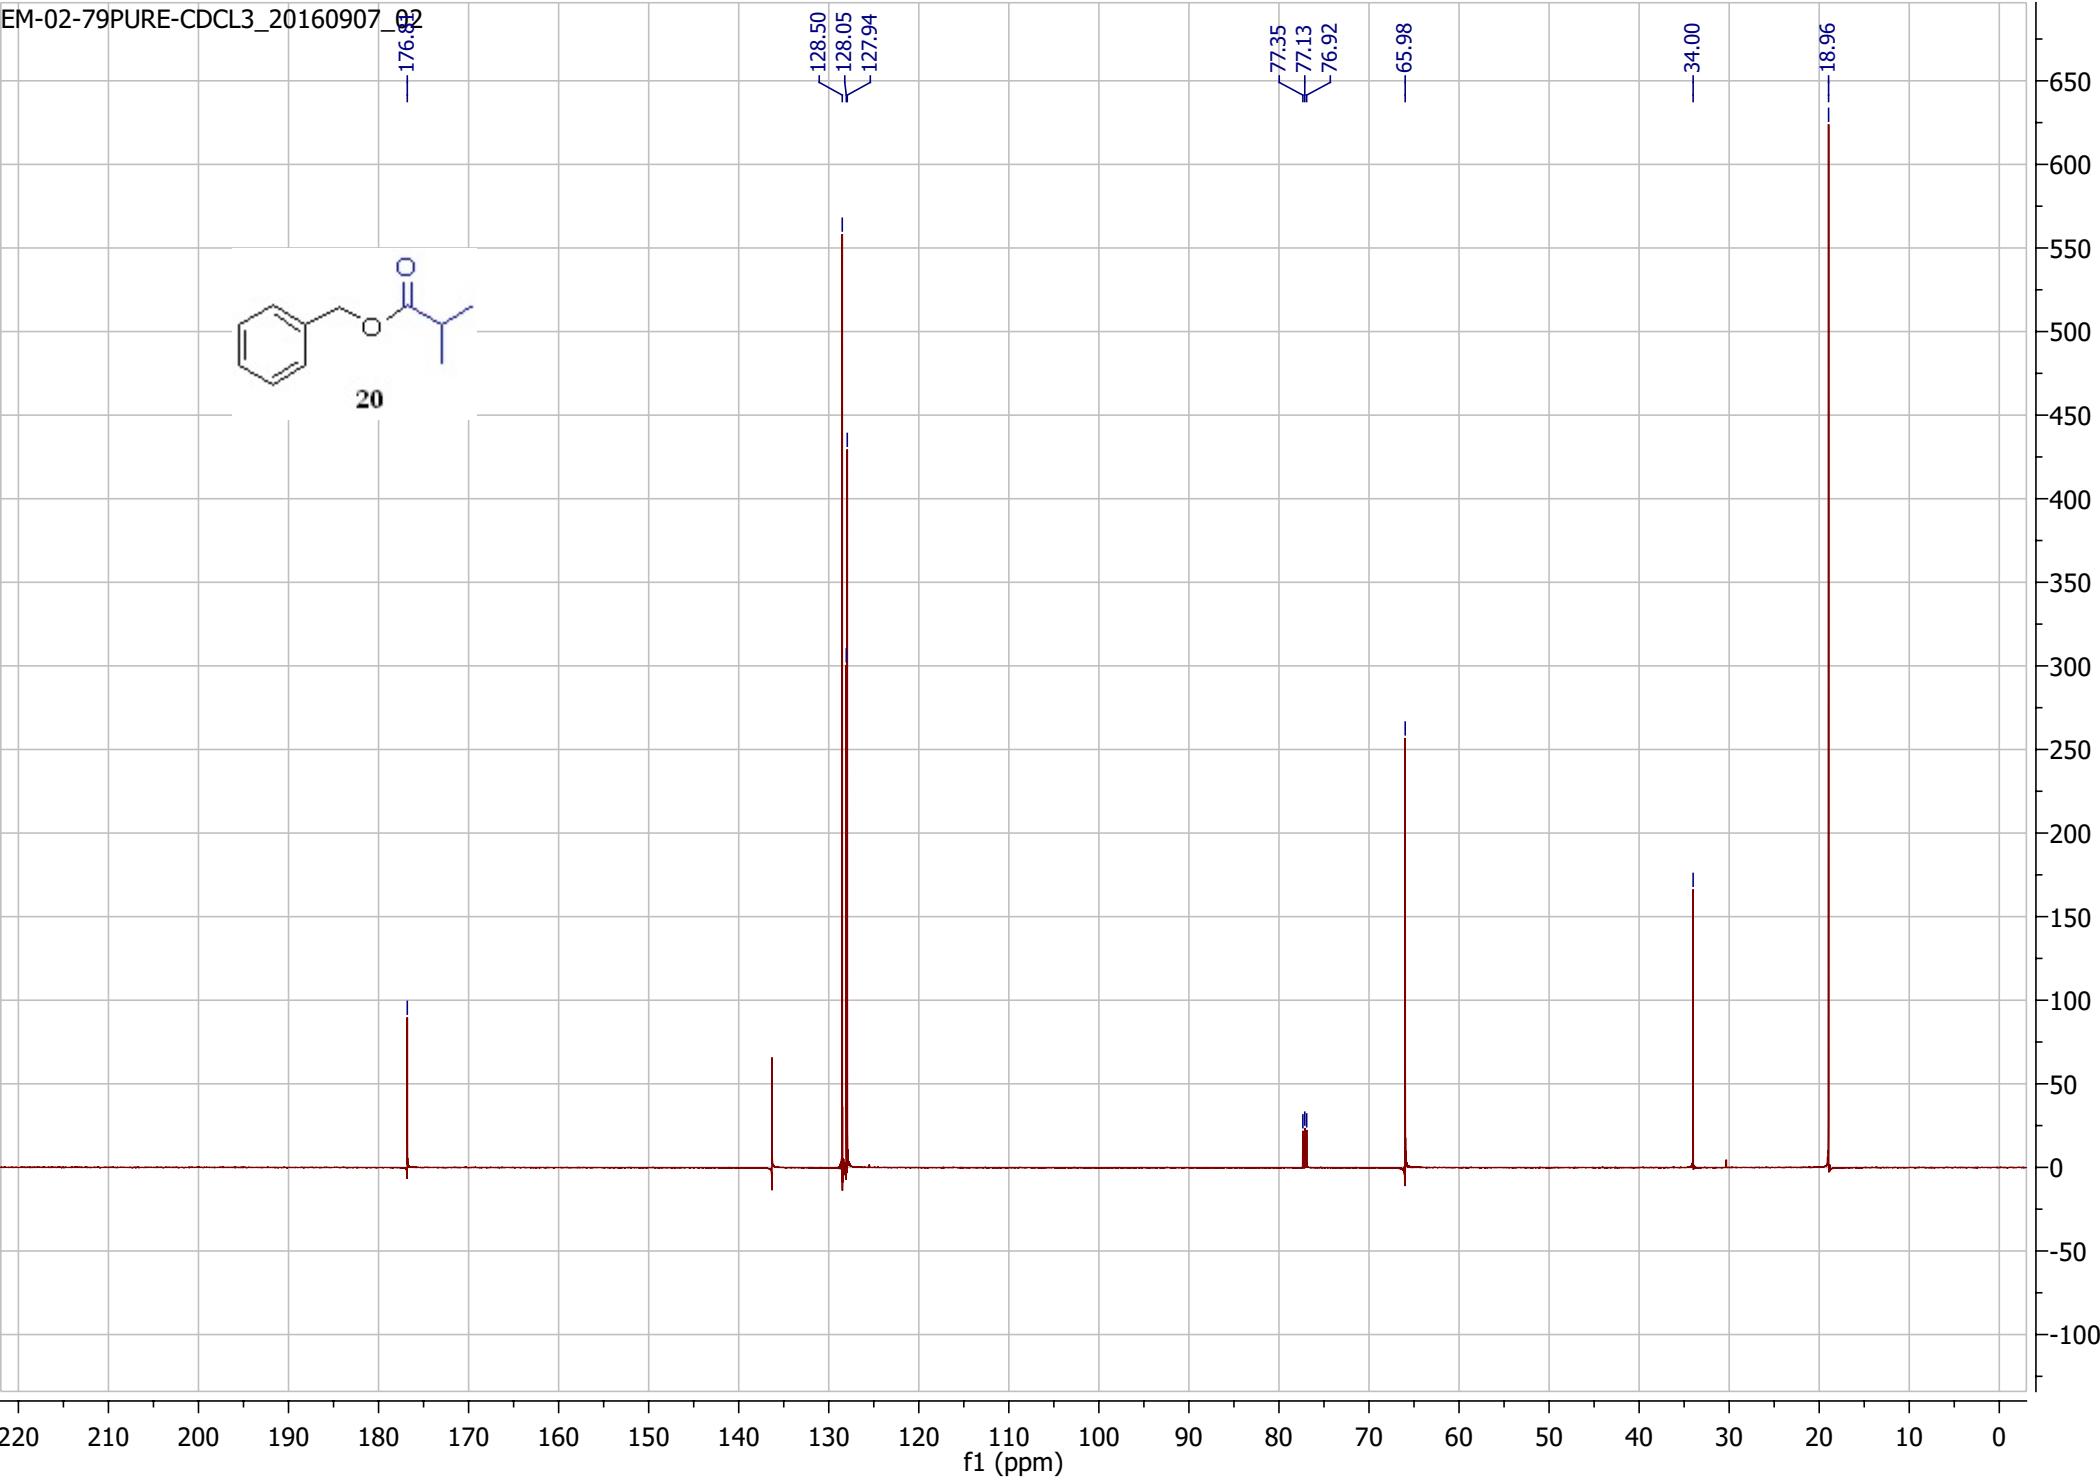

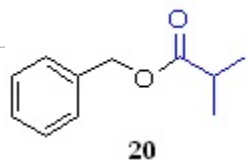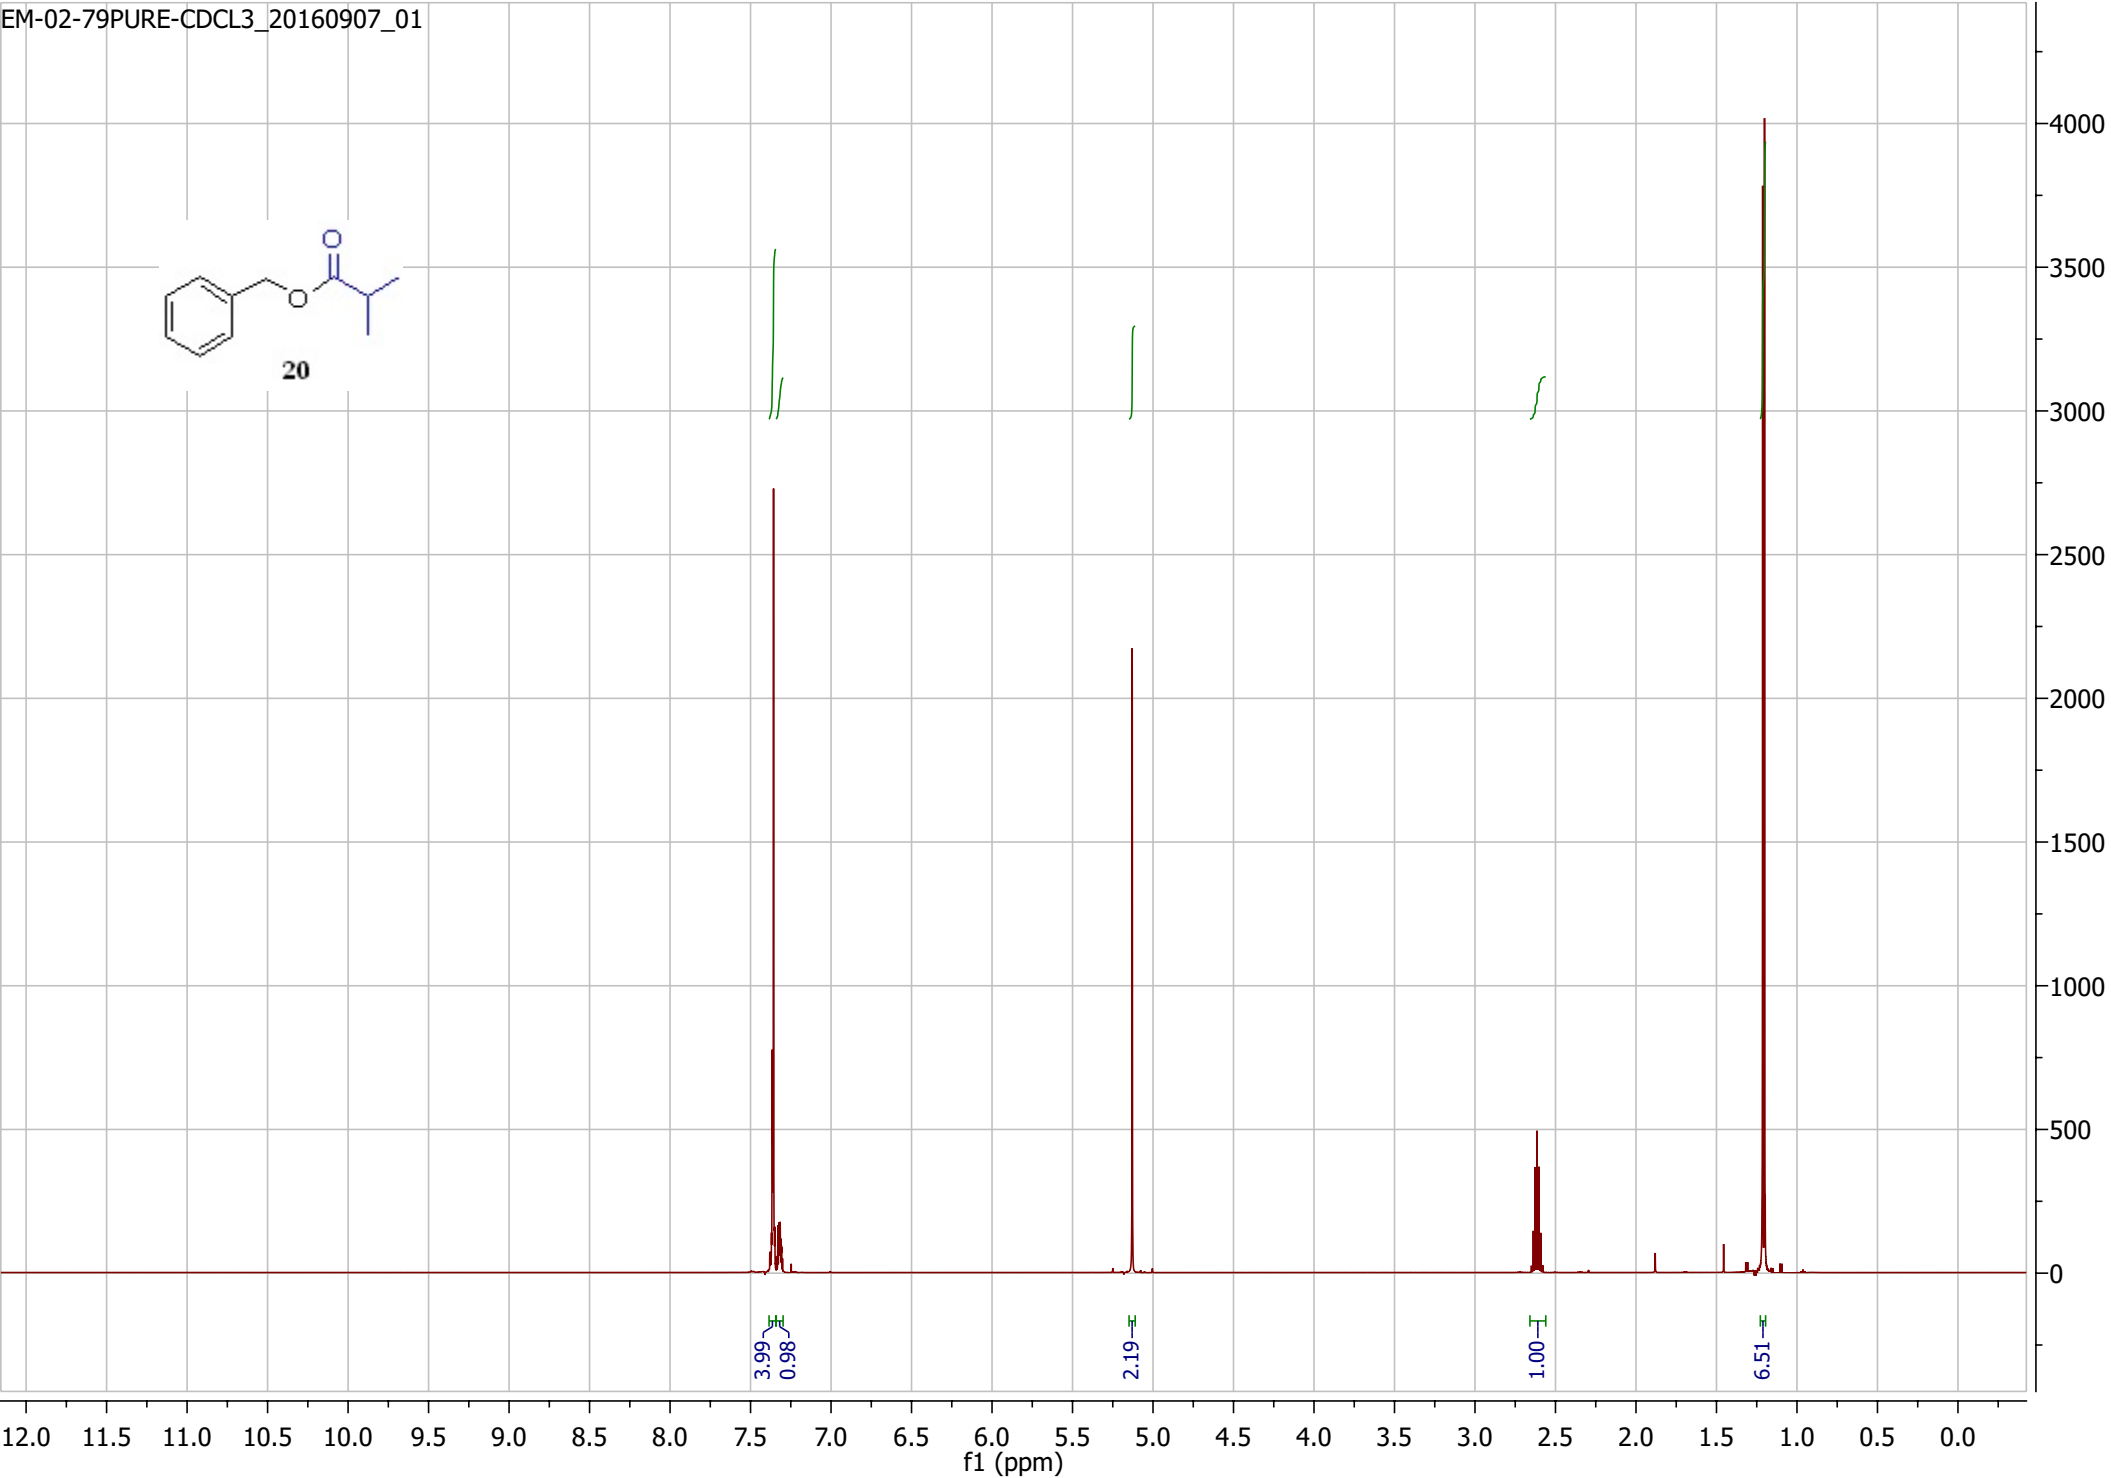

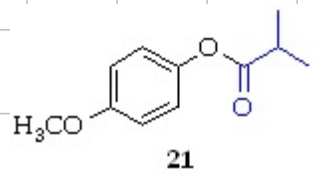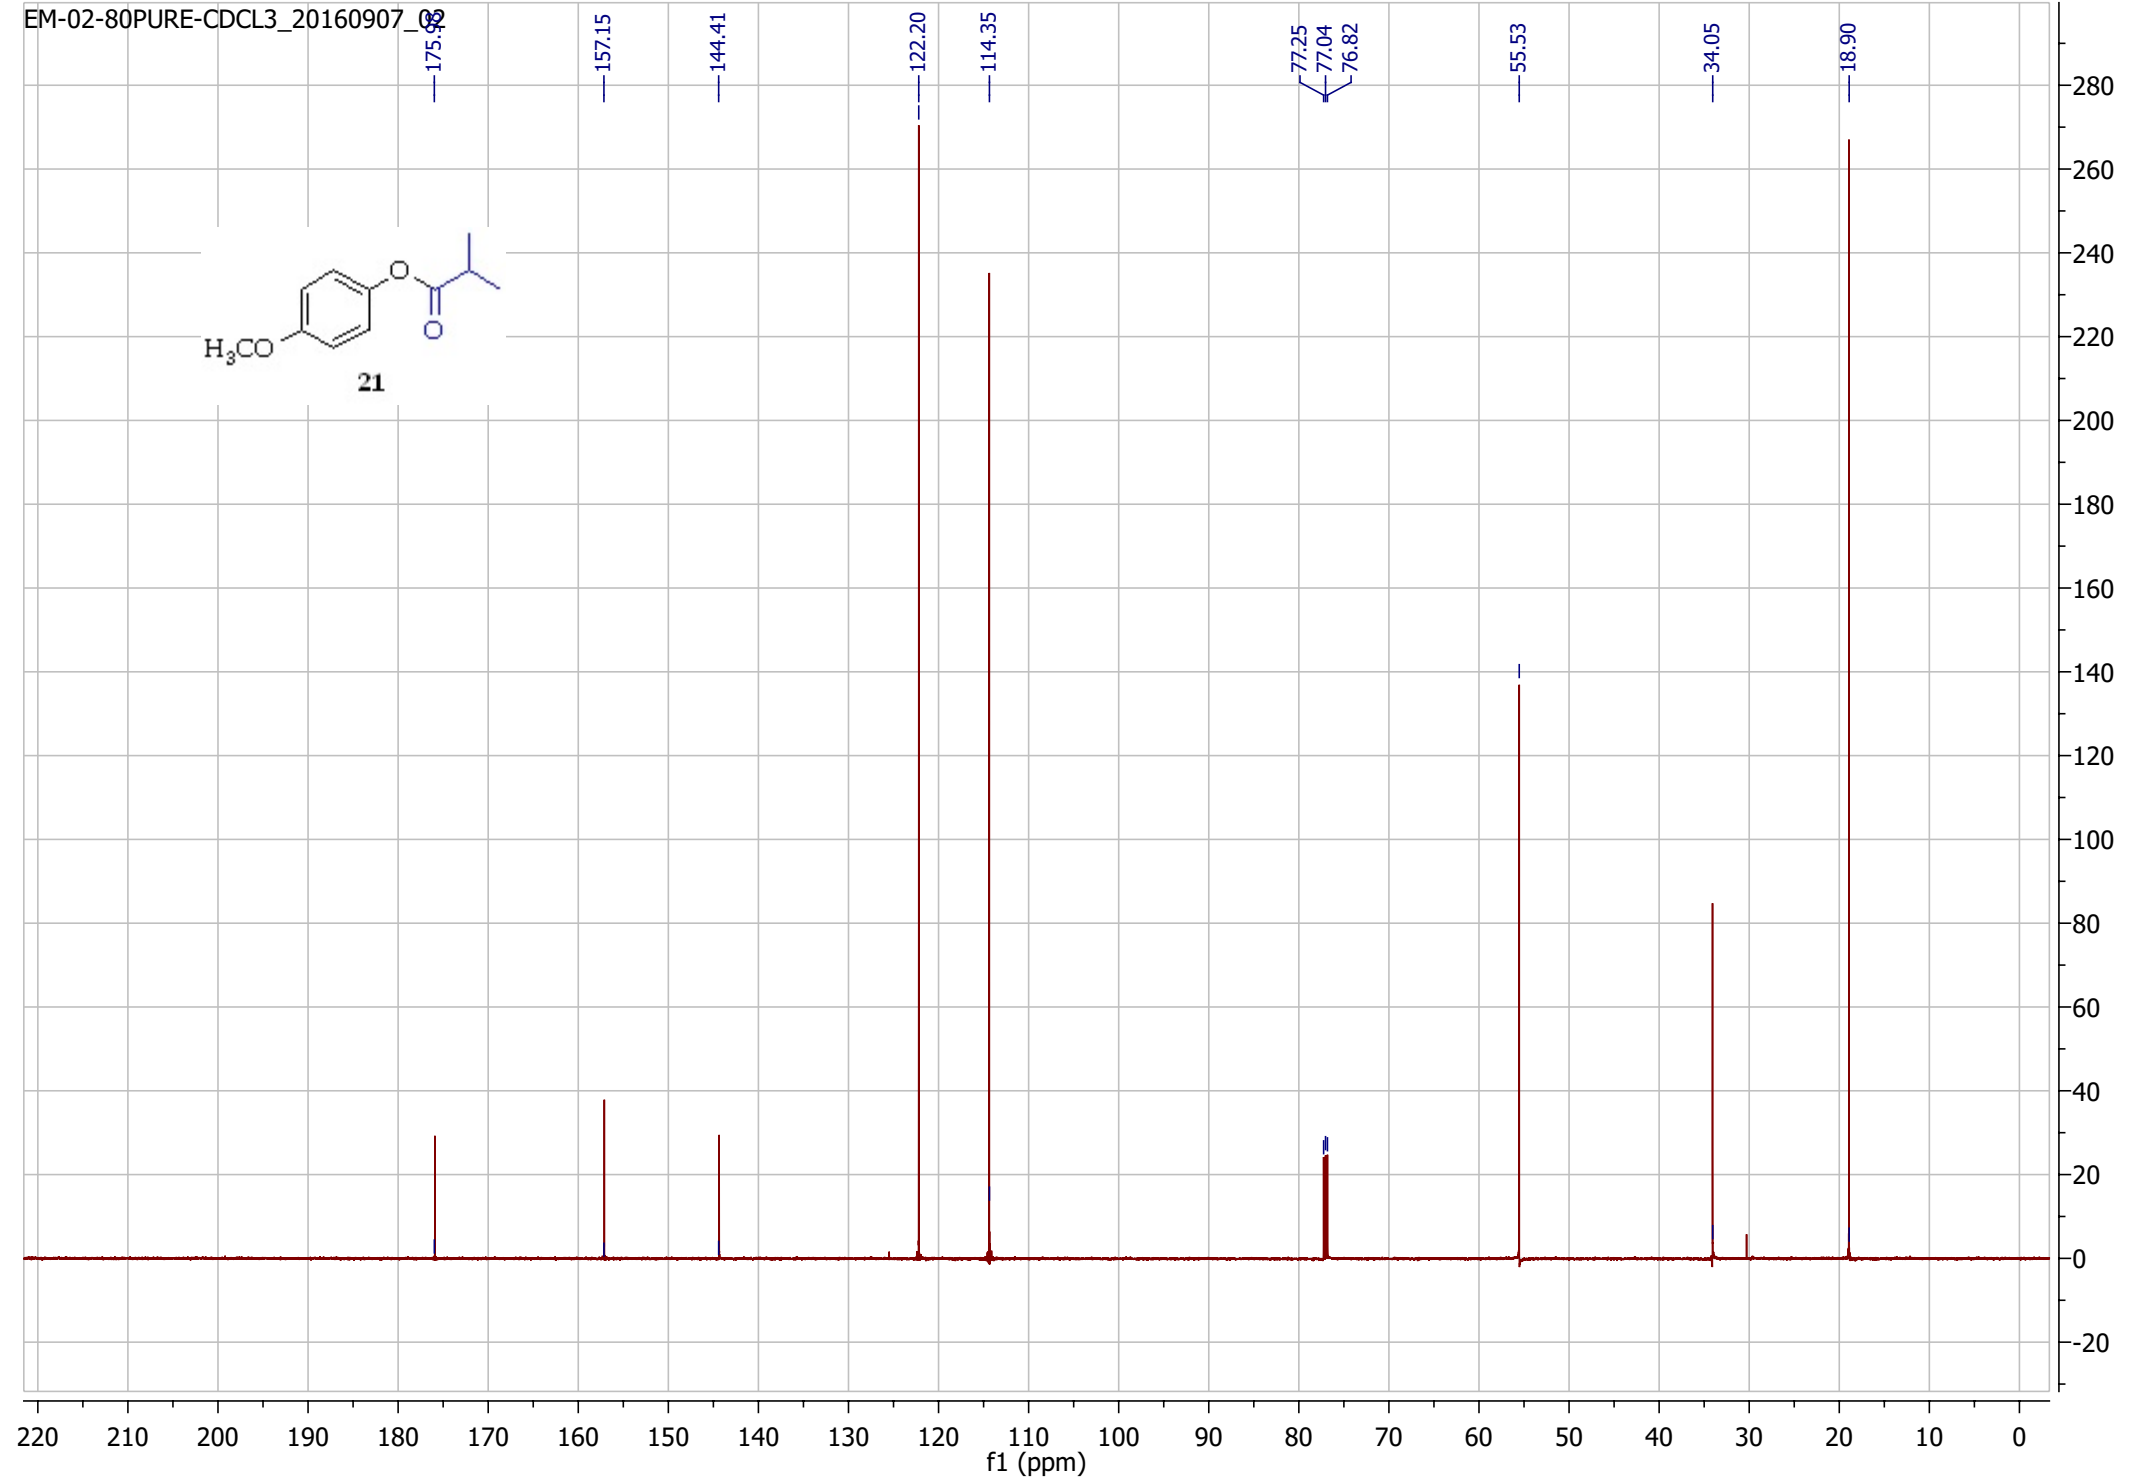

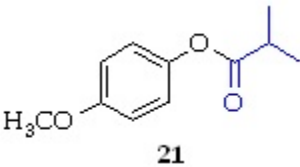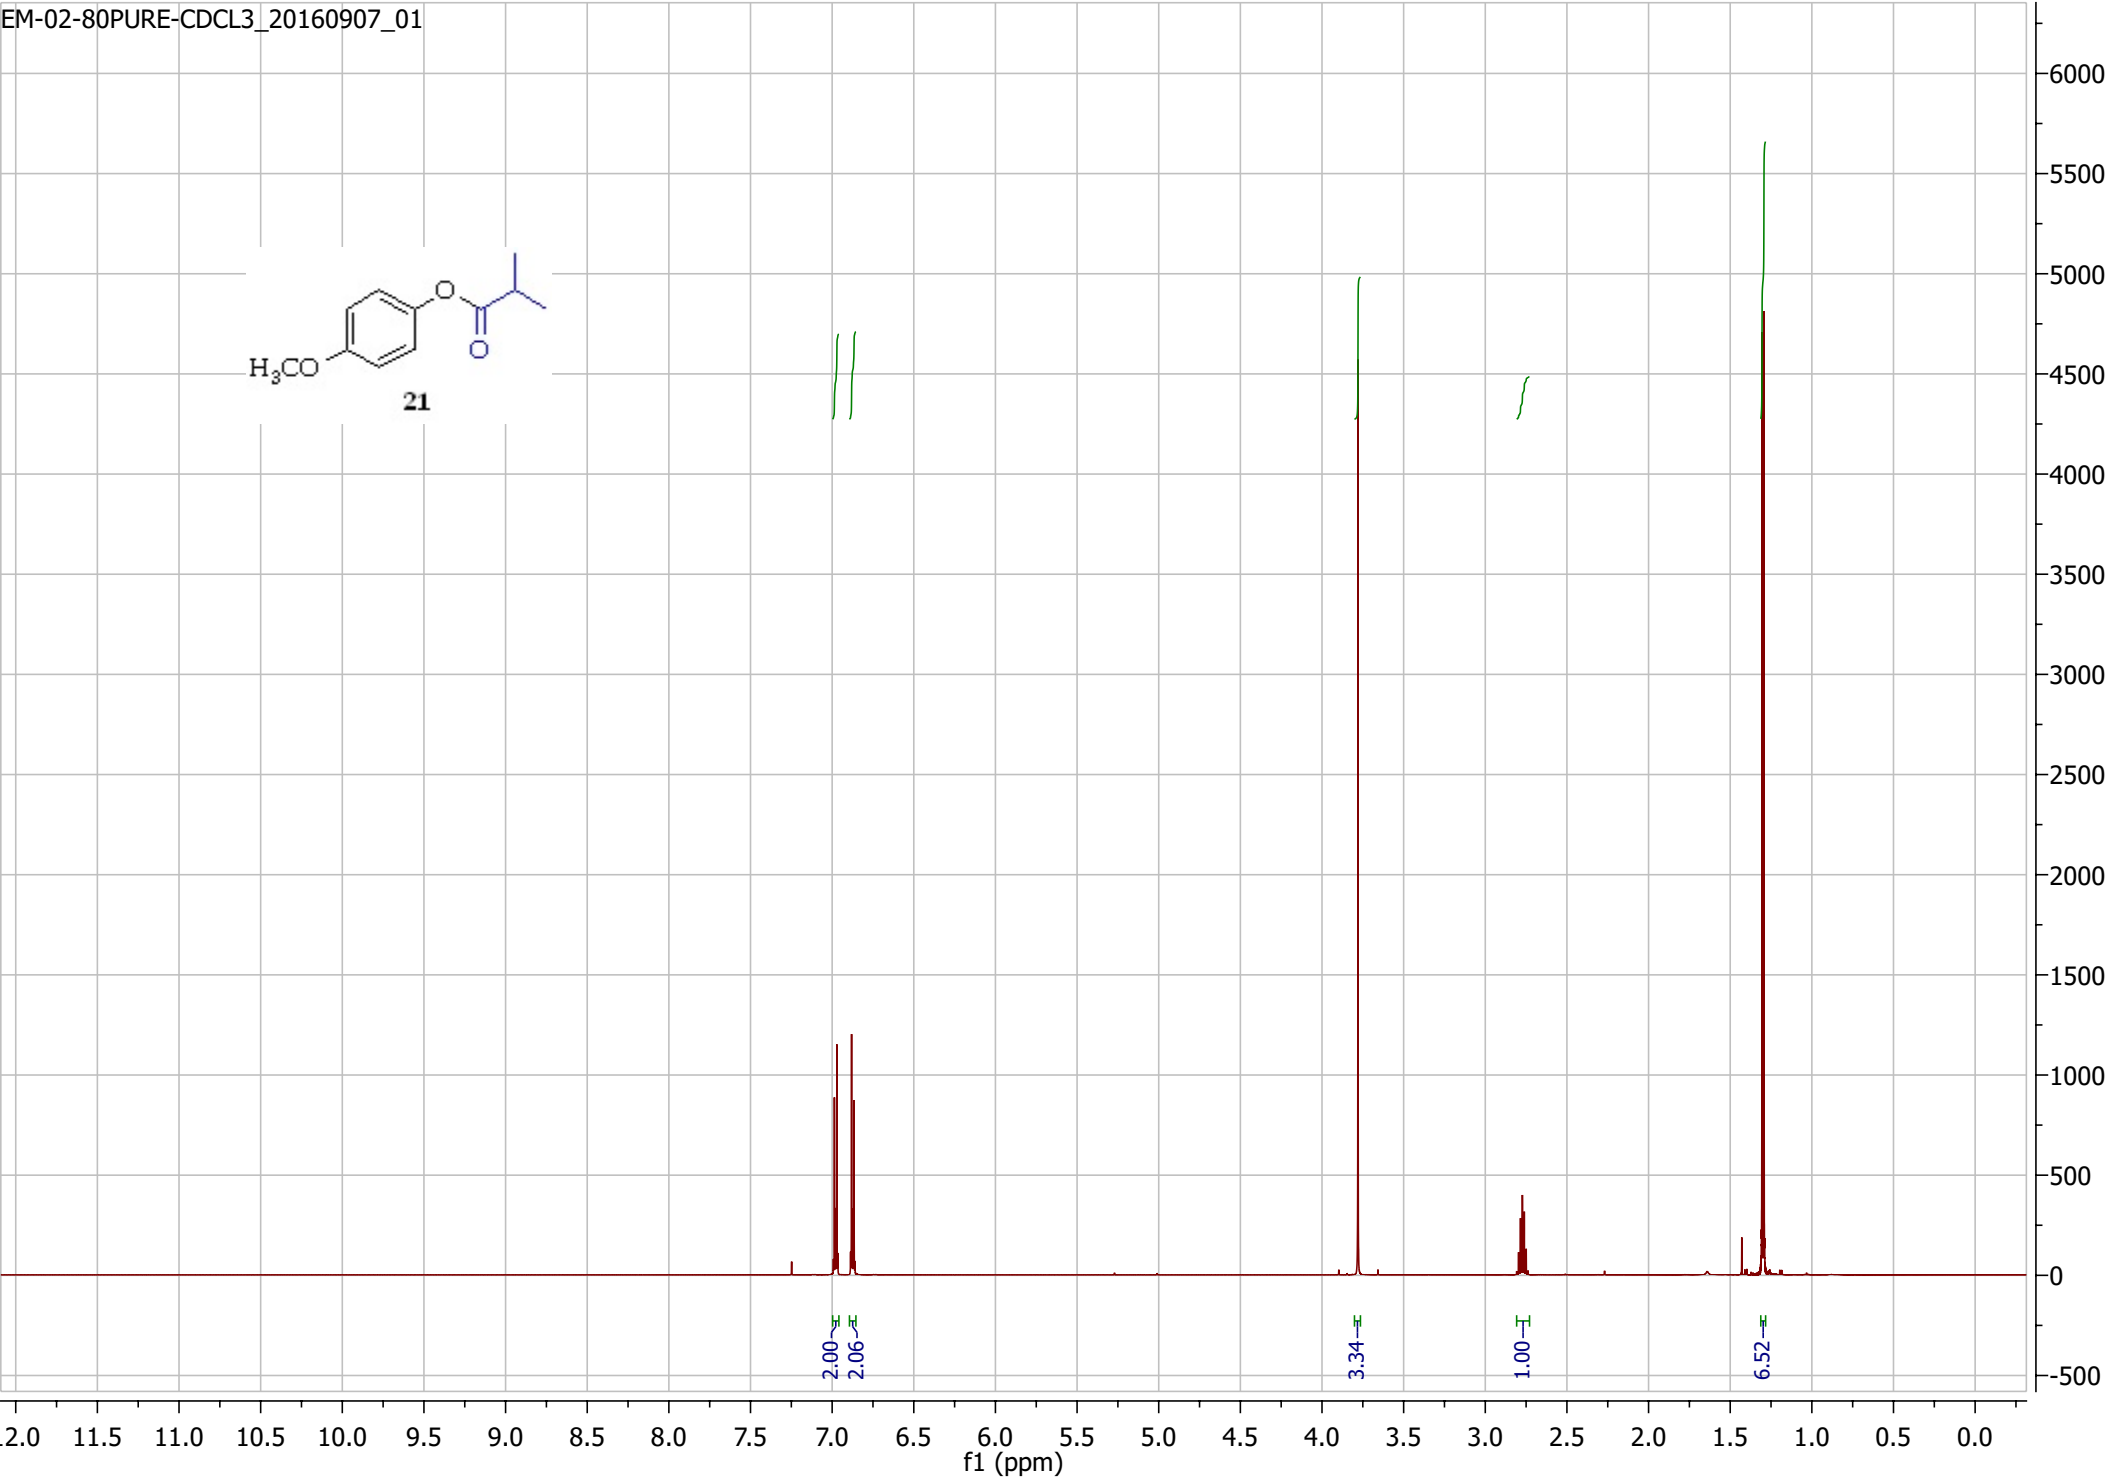

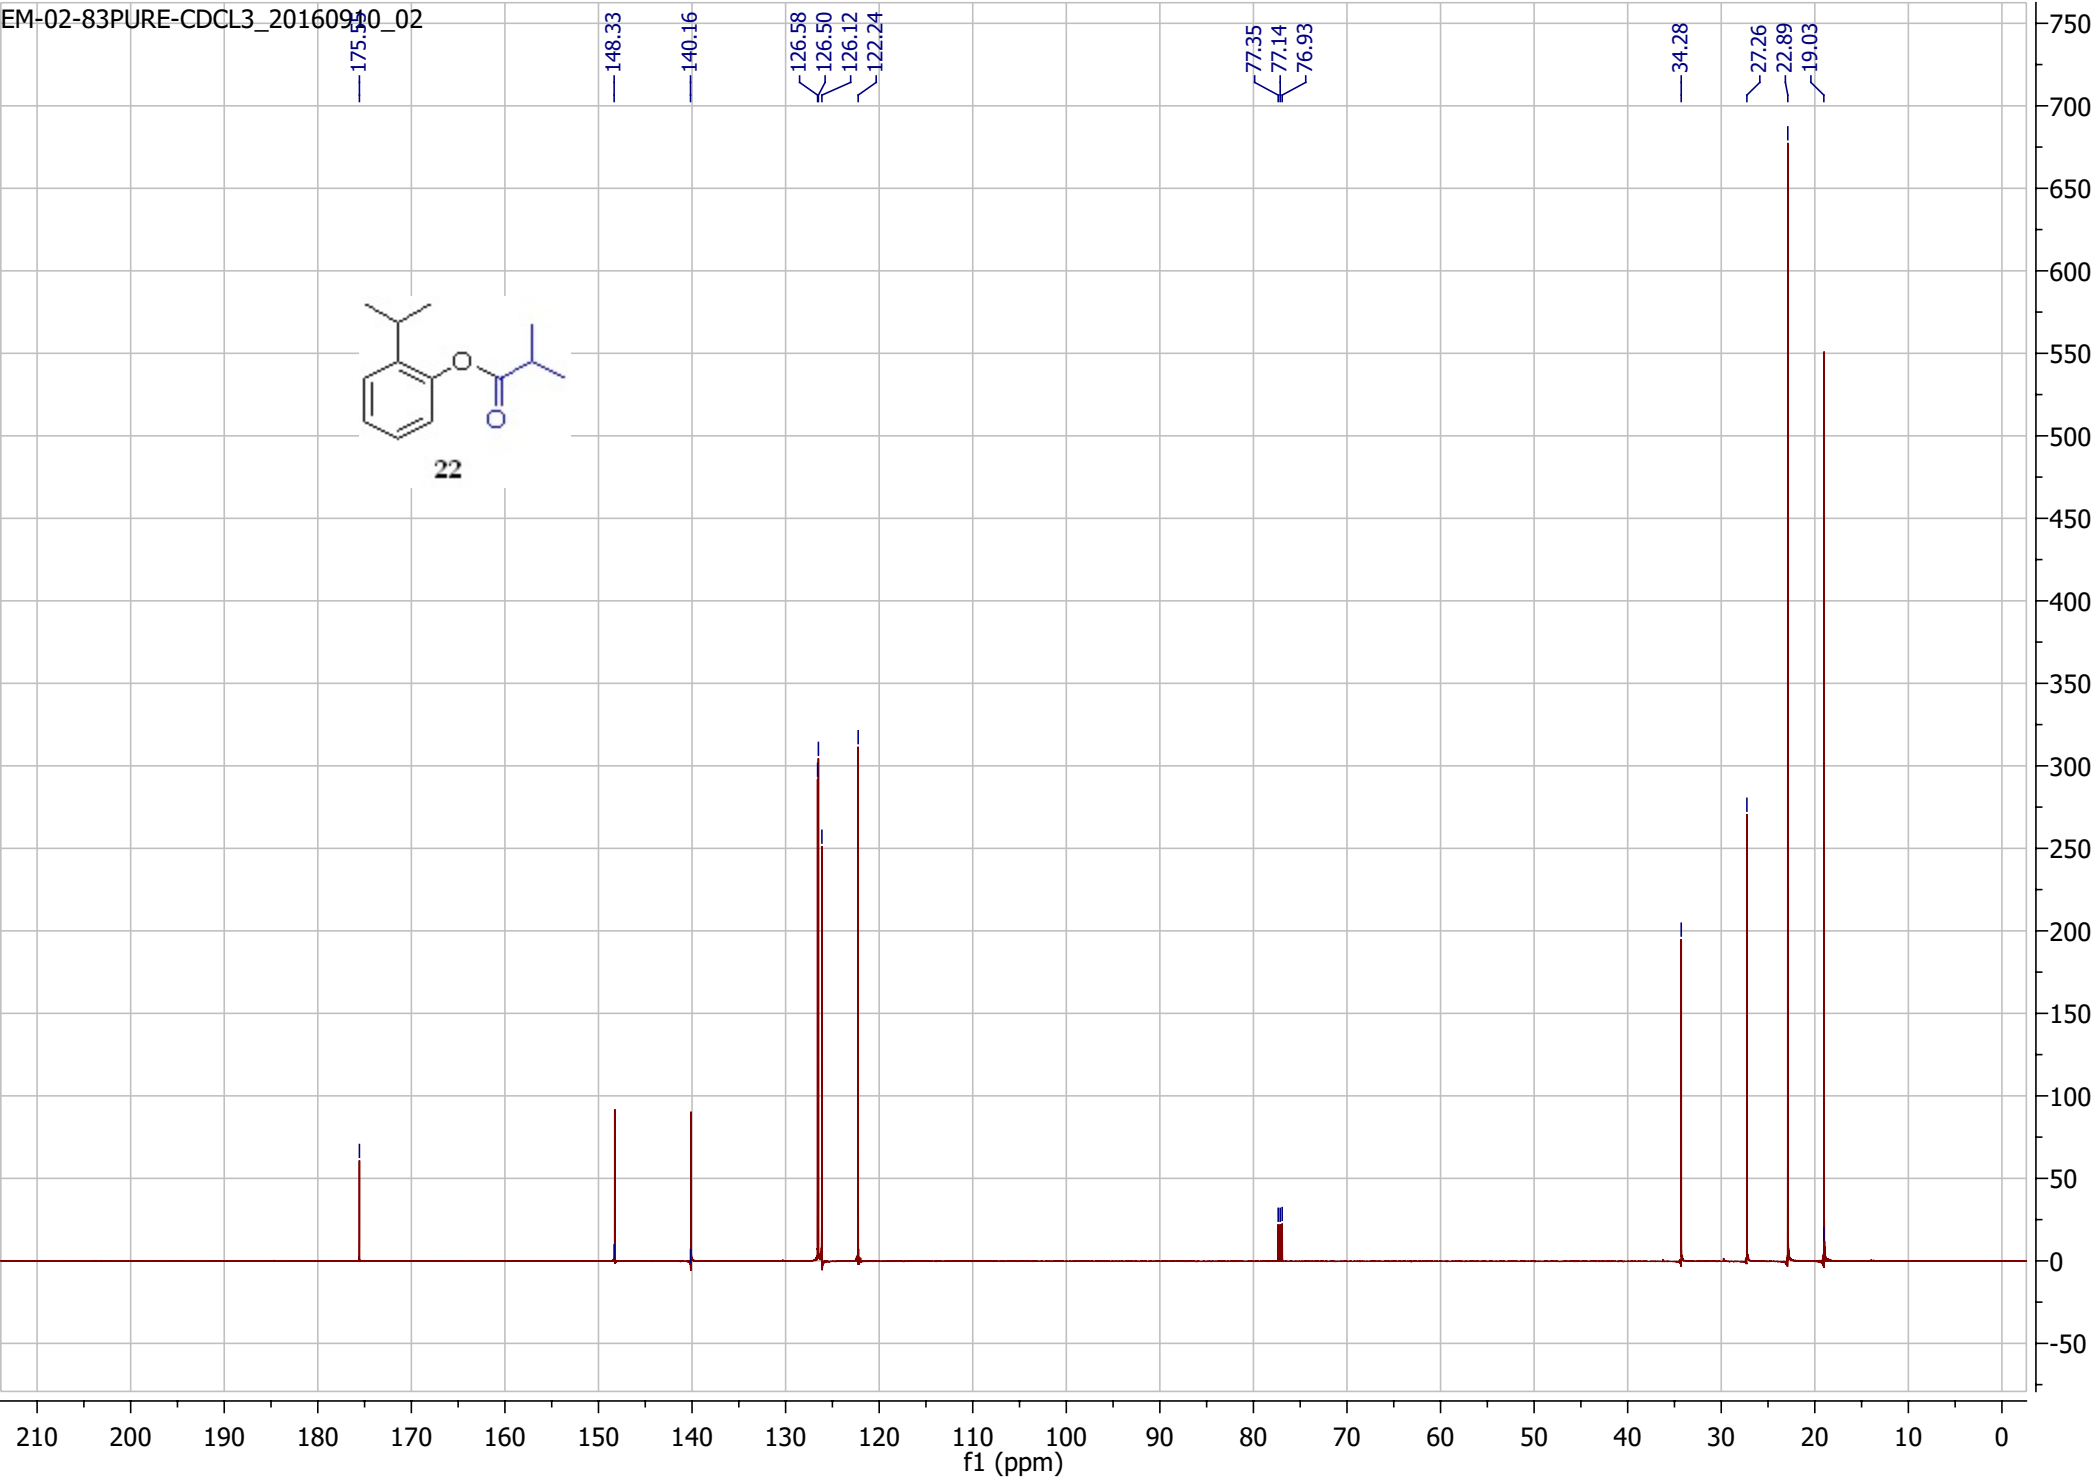

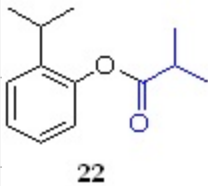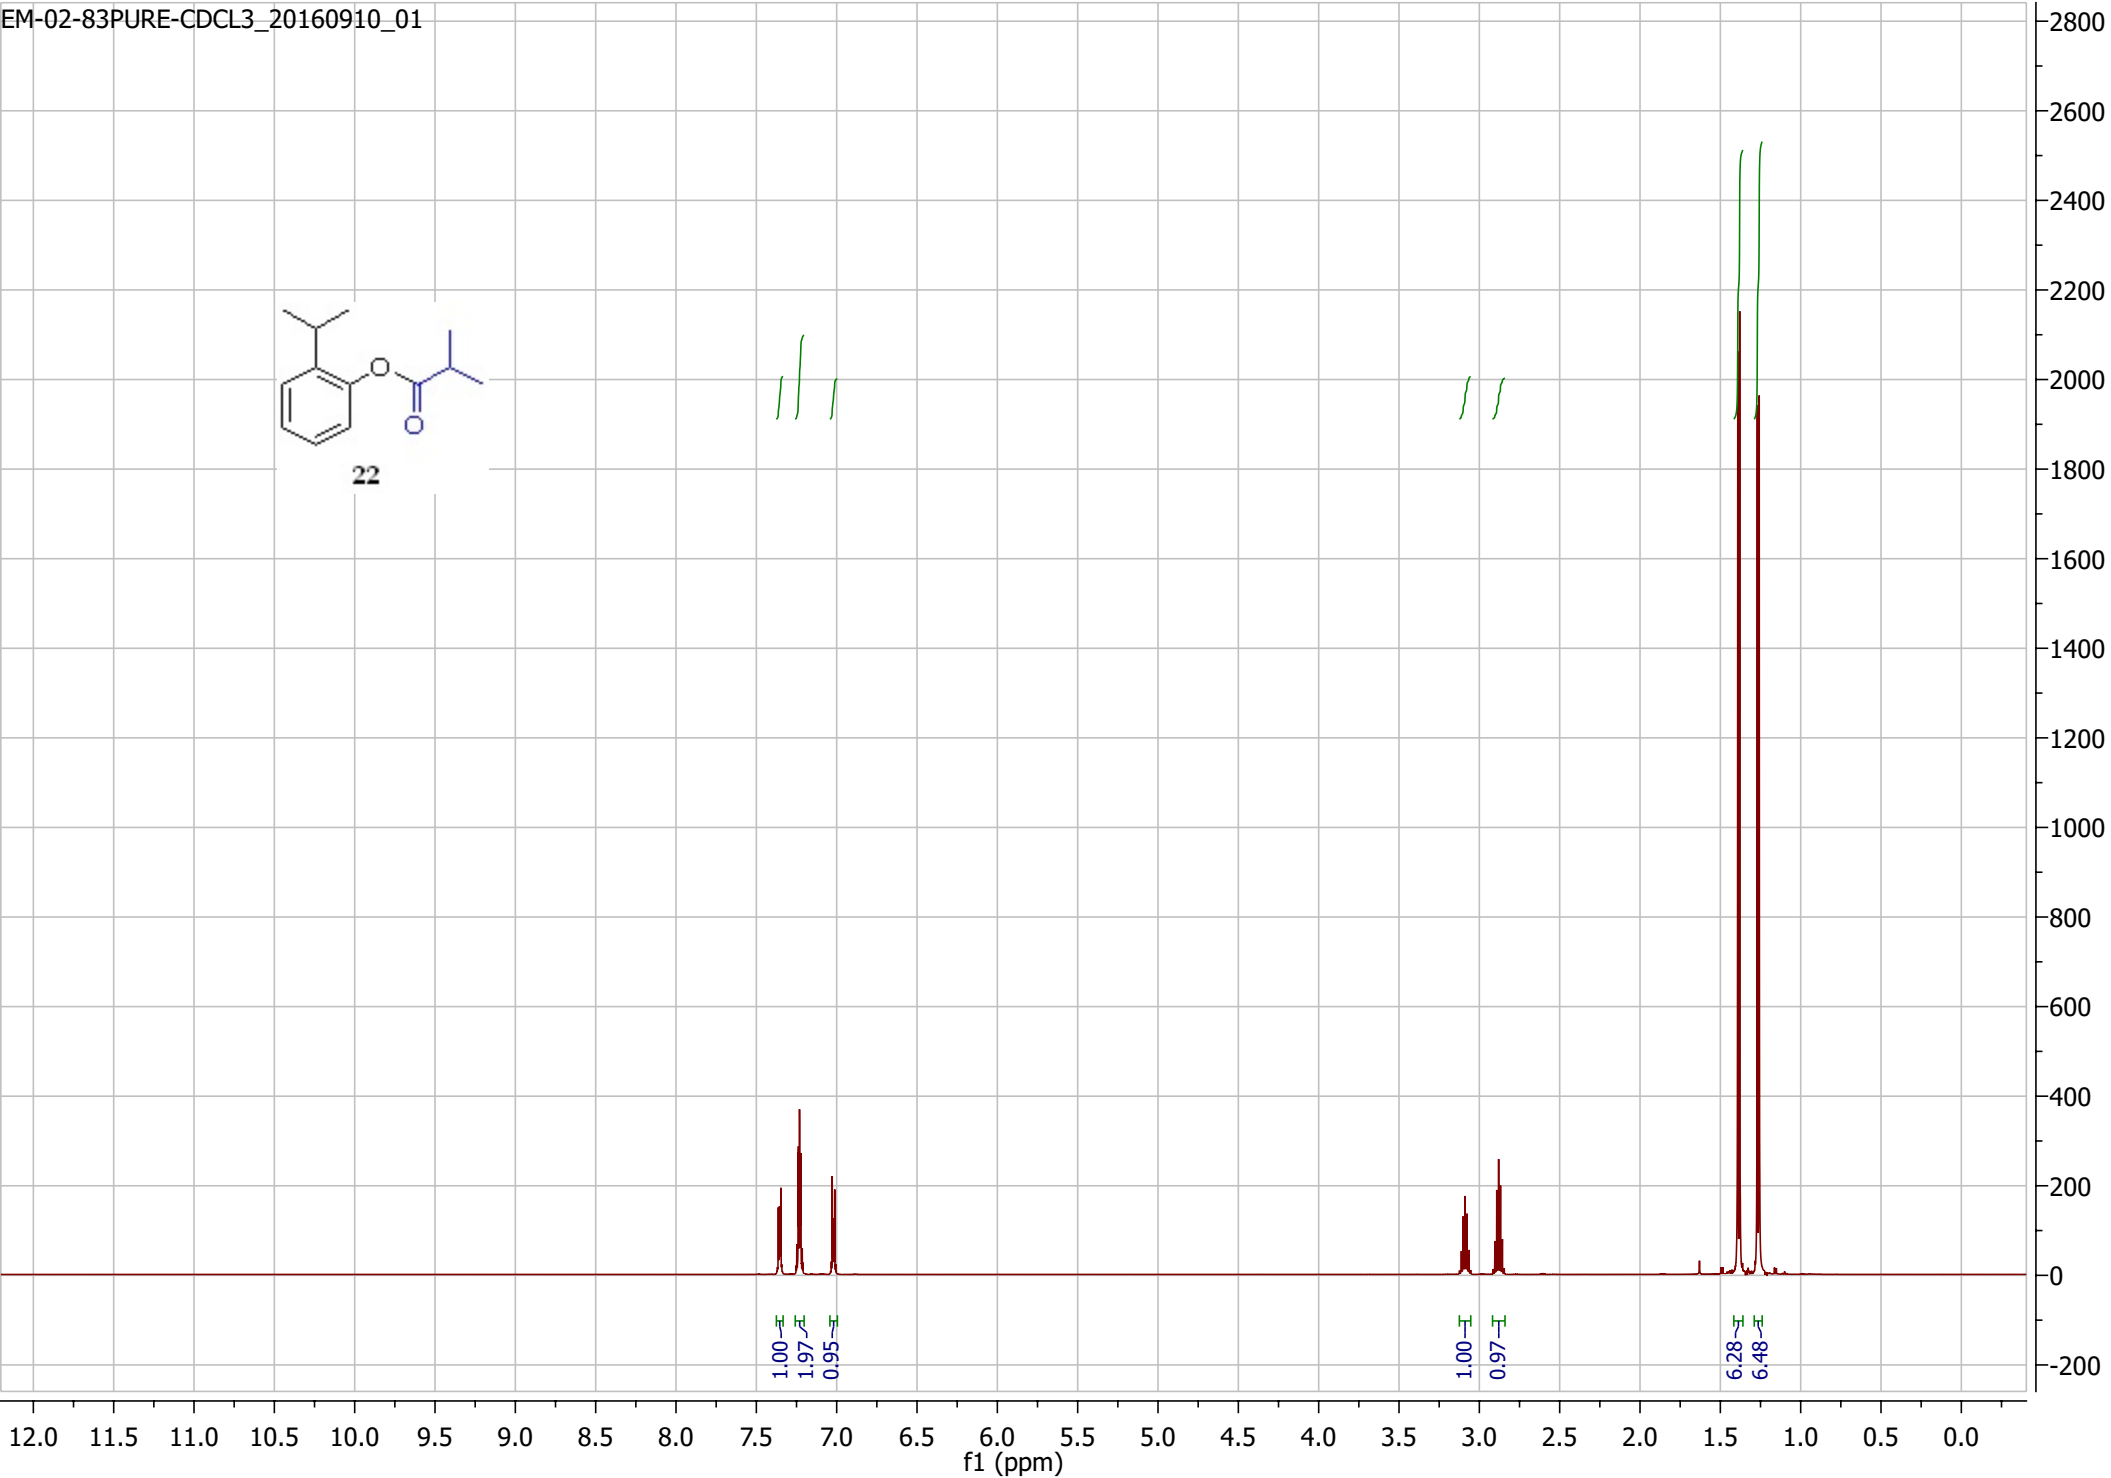

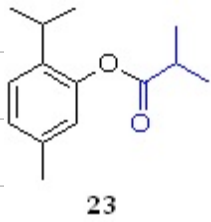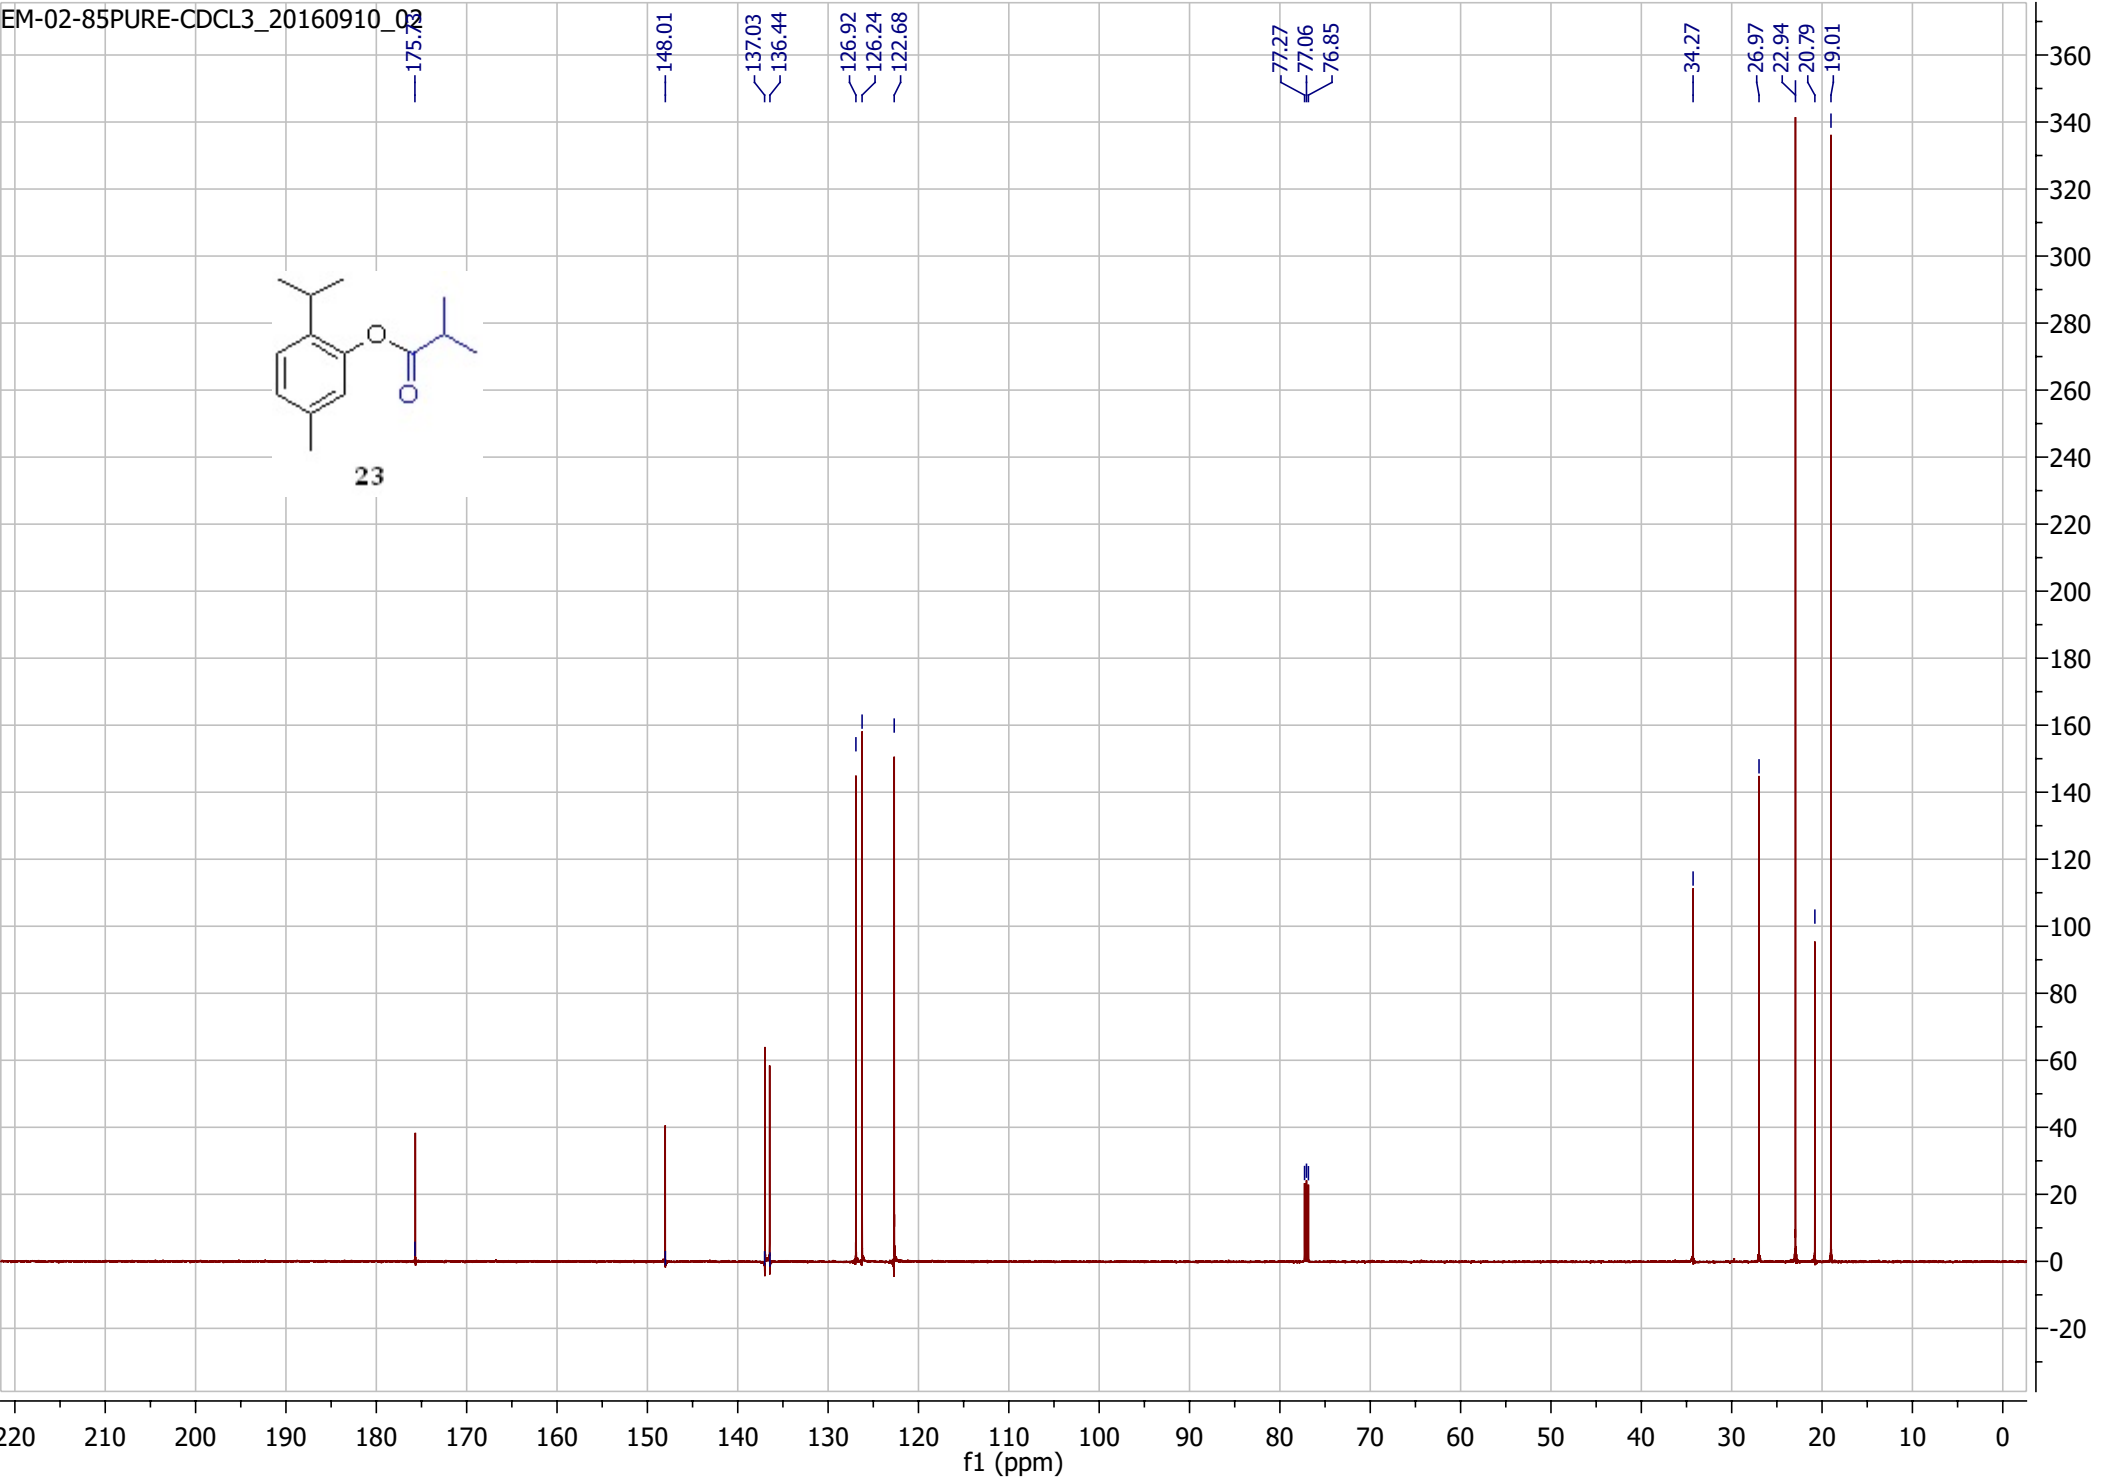

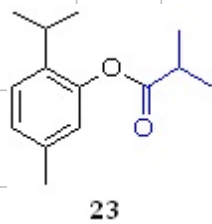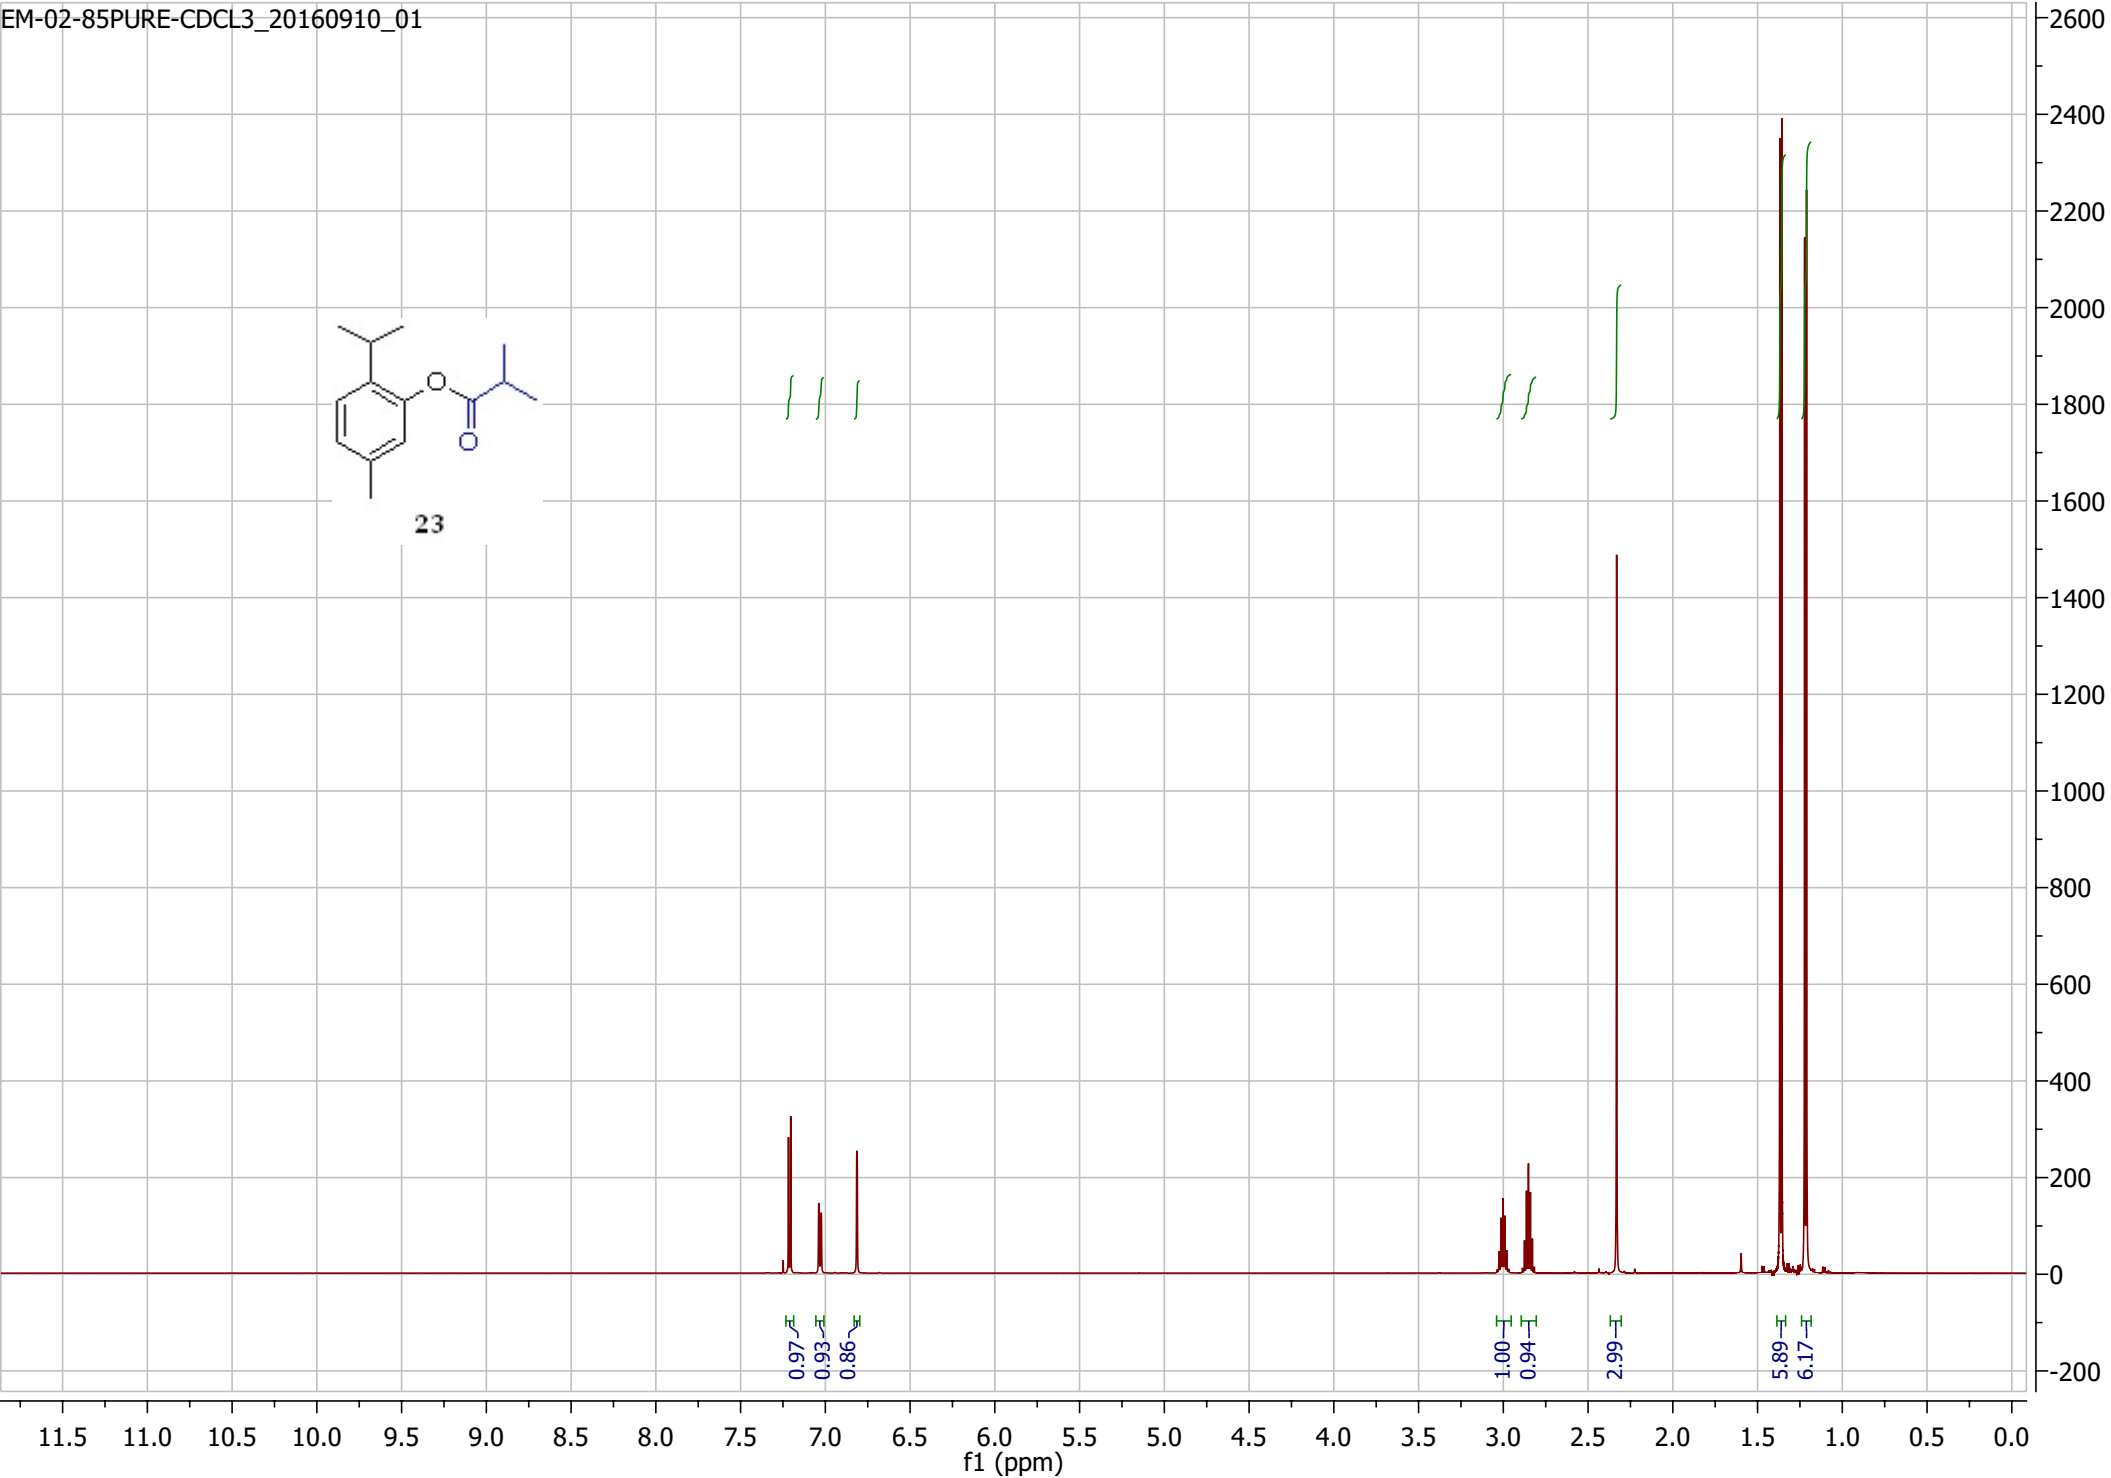



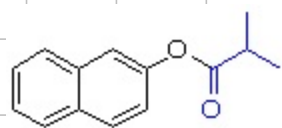

24

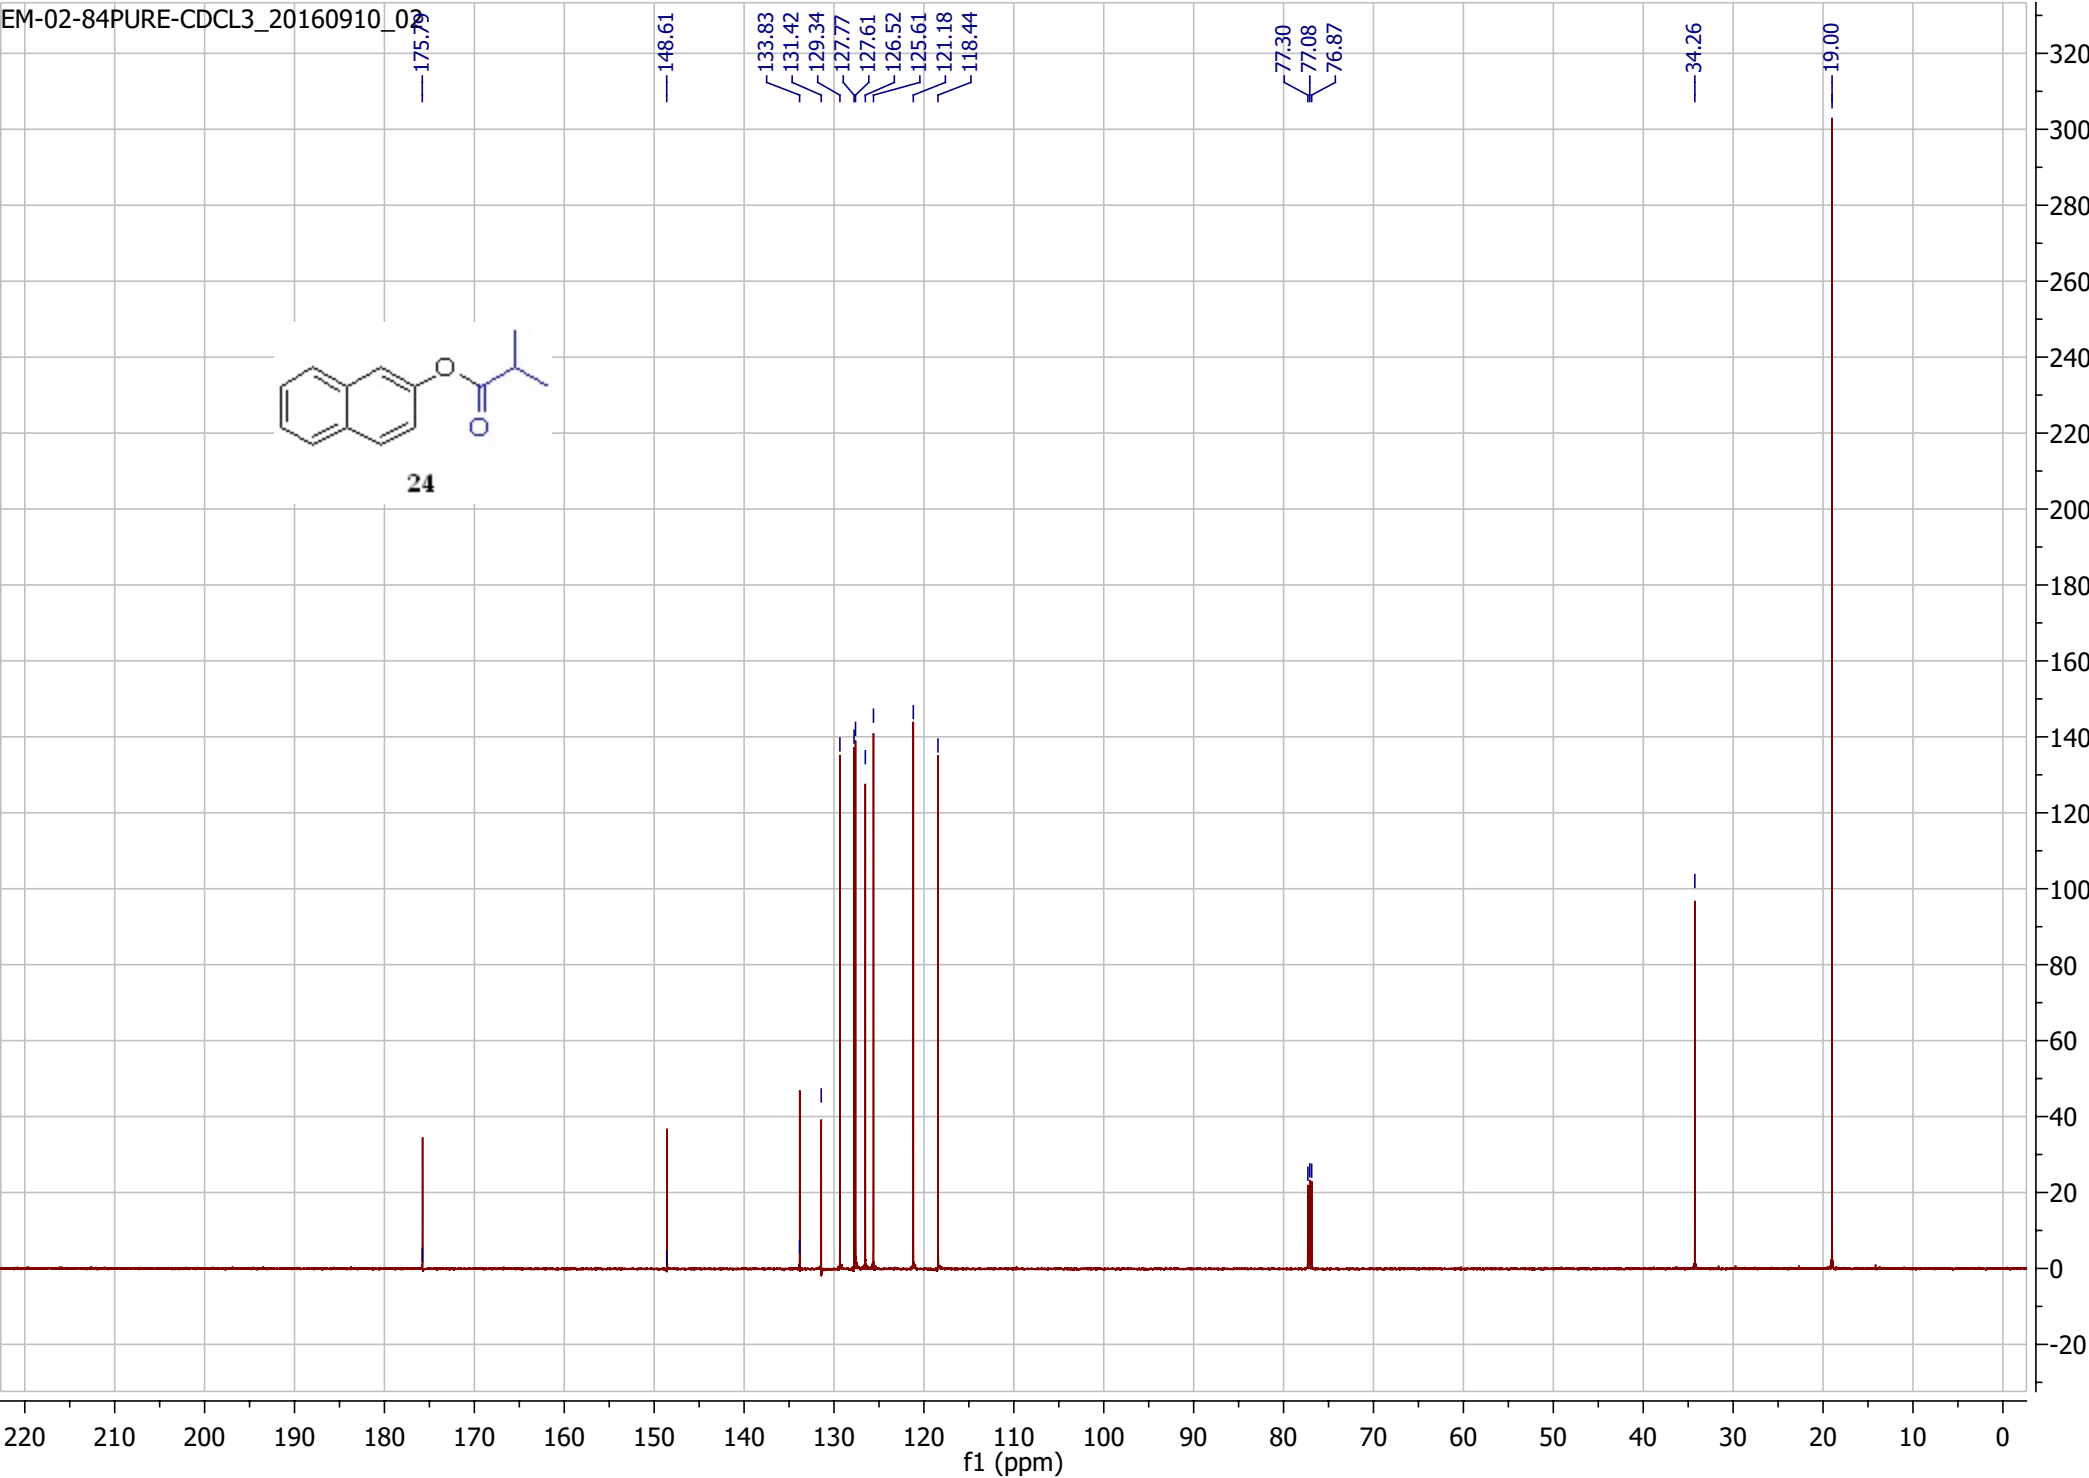

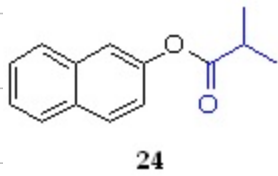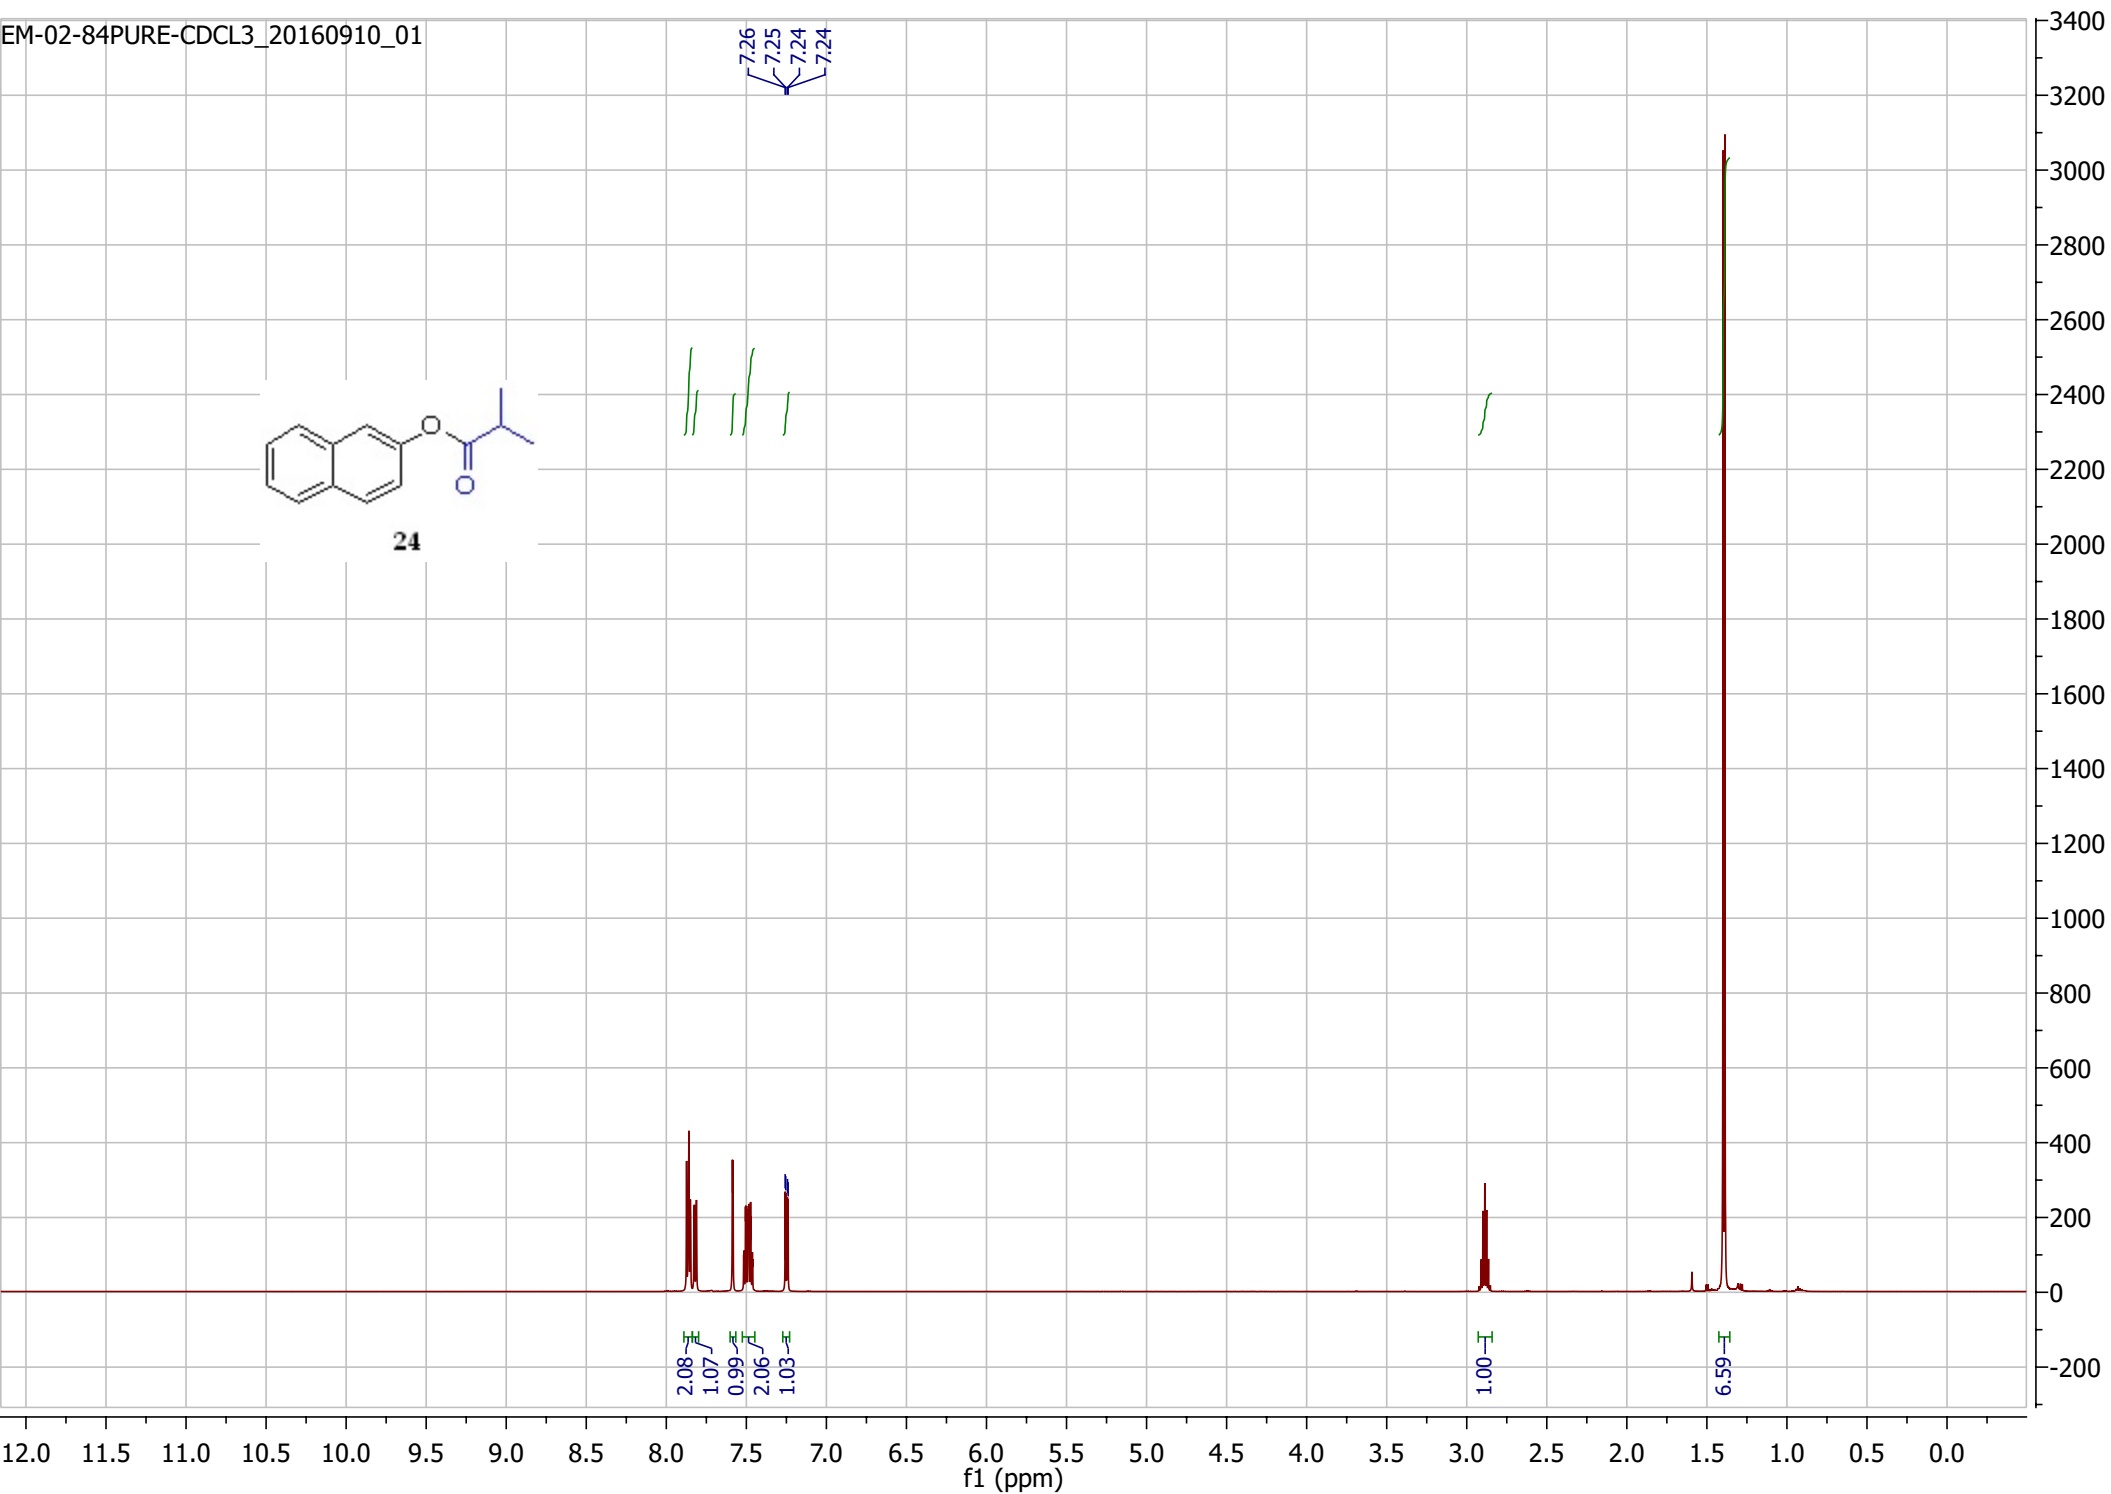

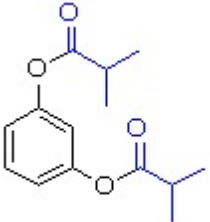

25

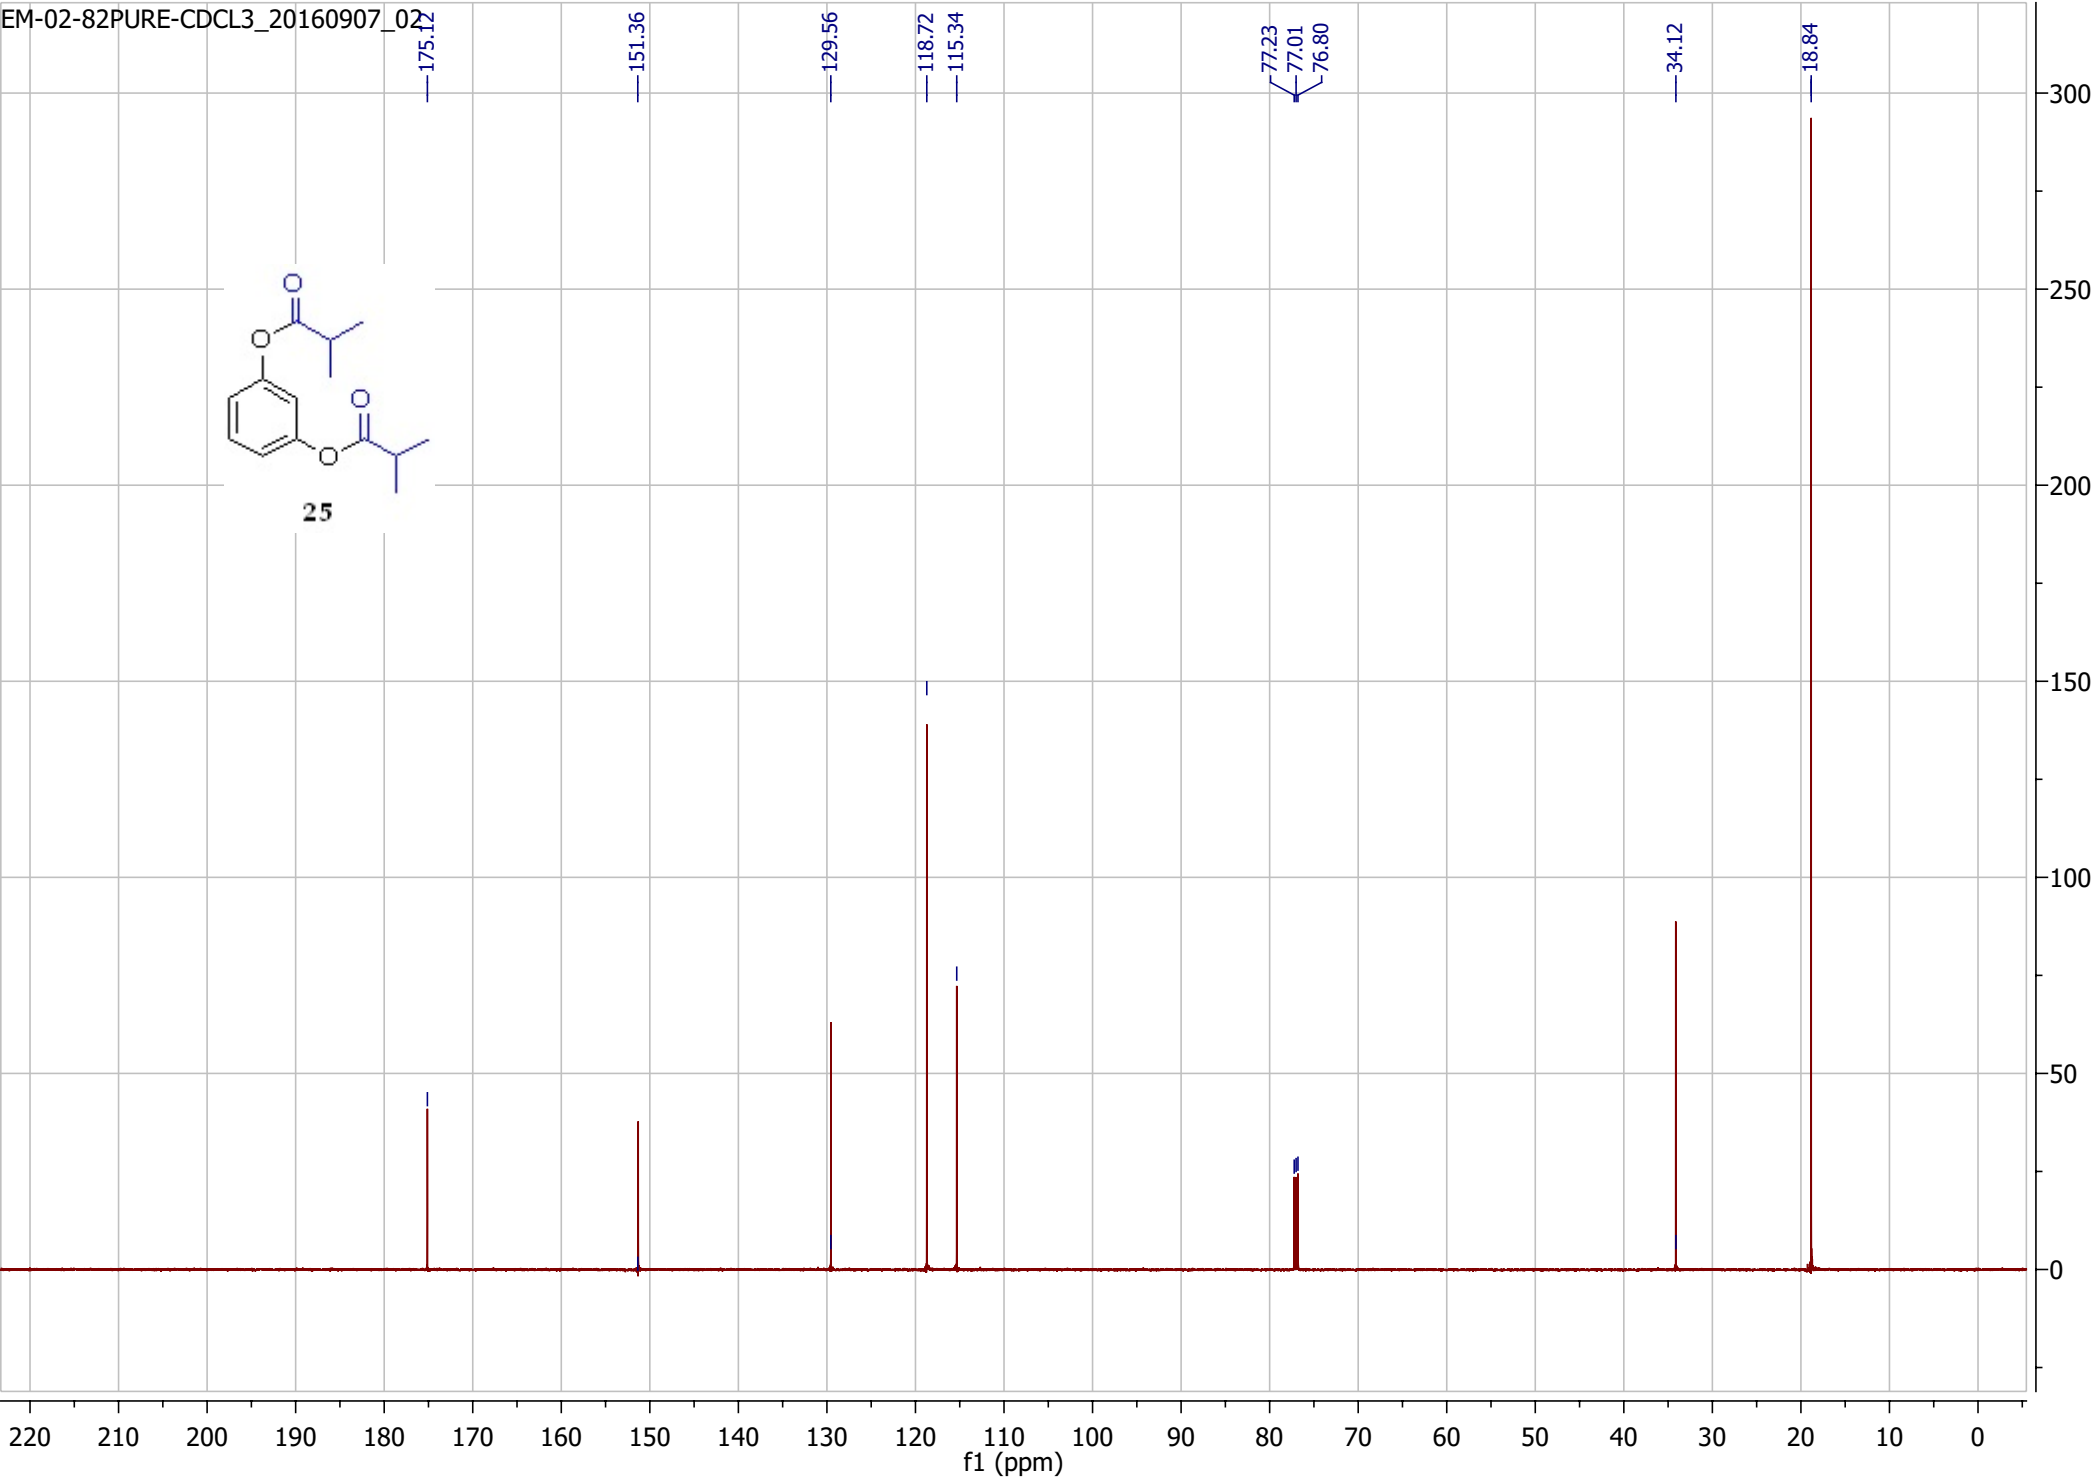

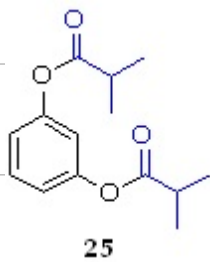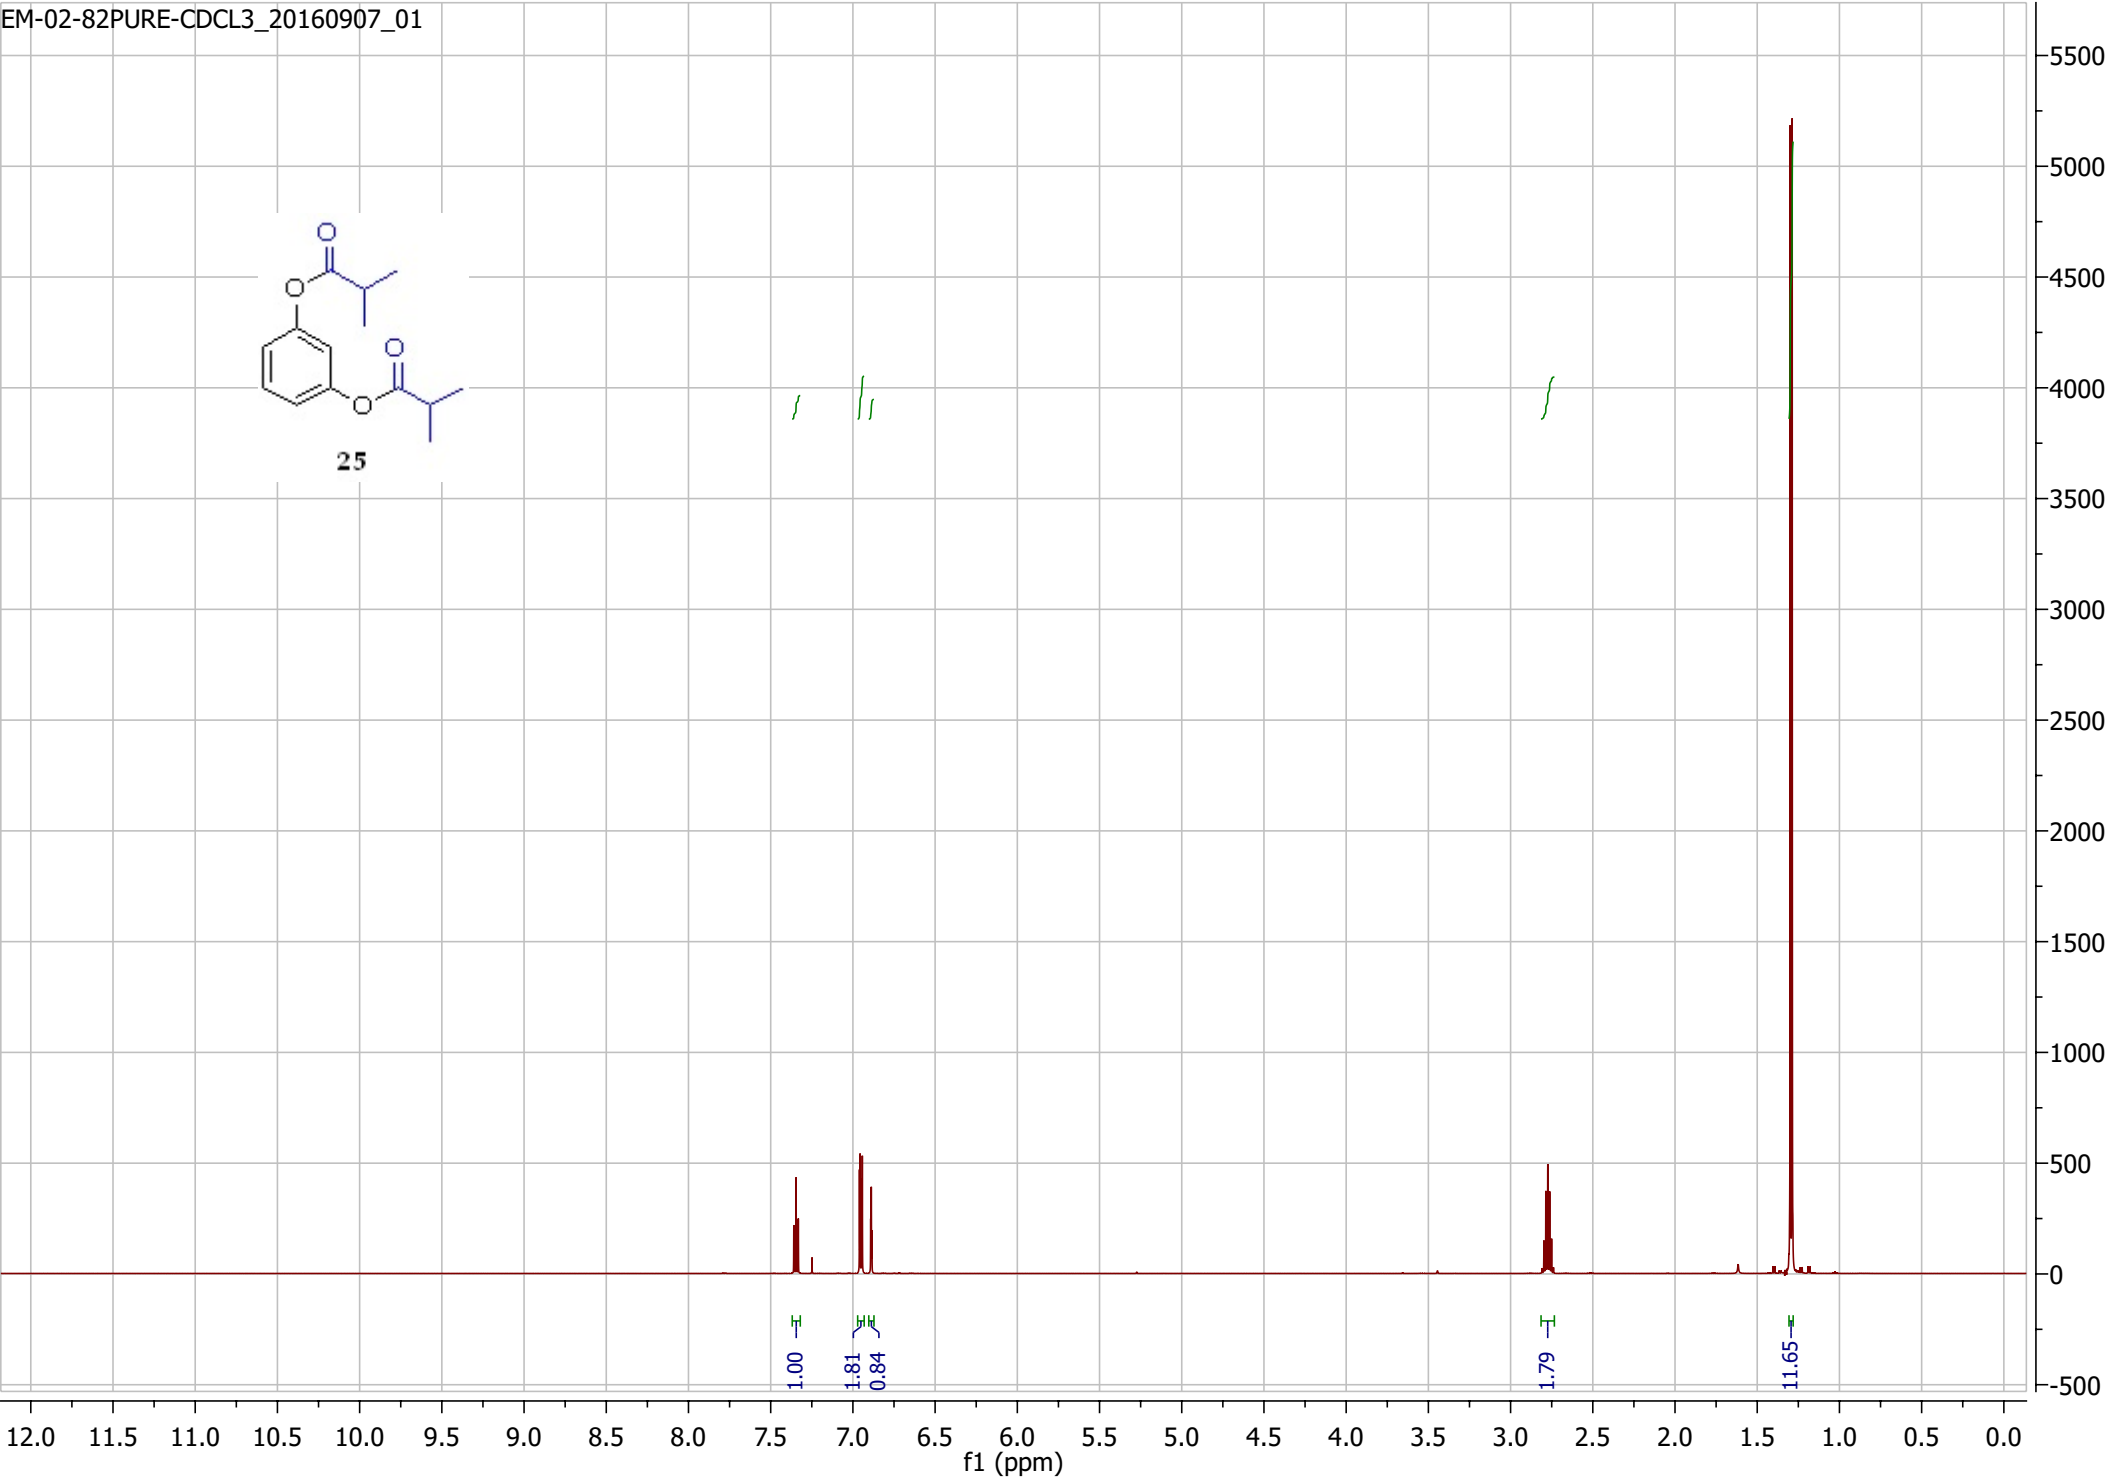

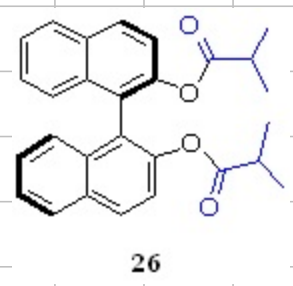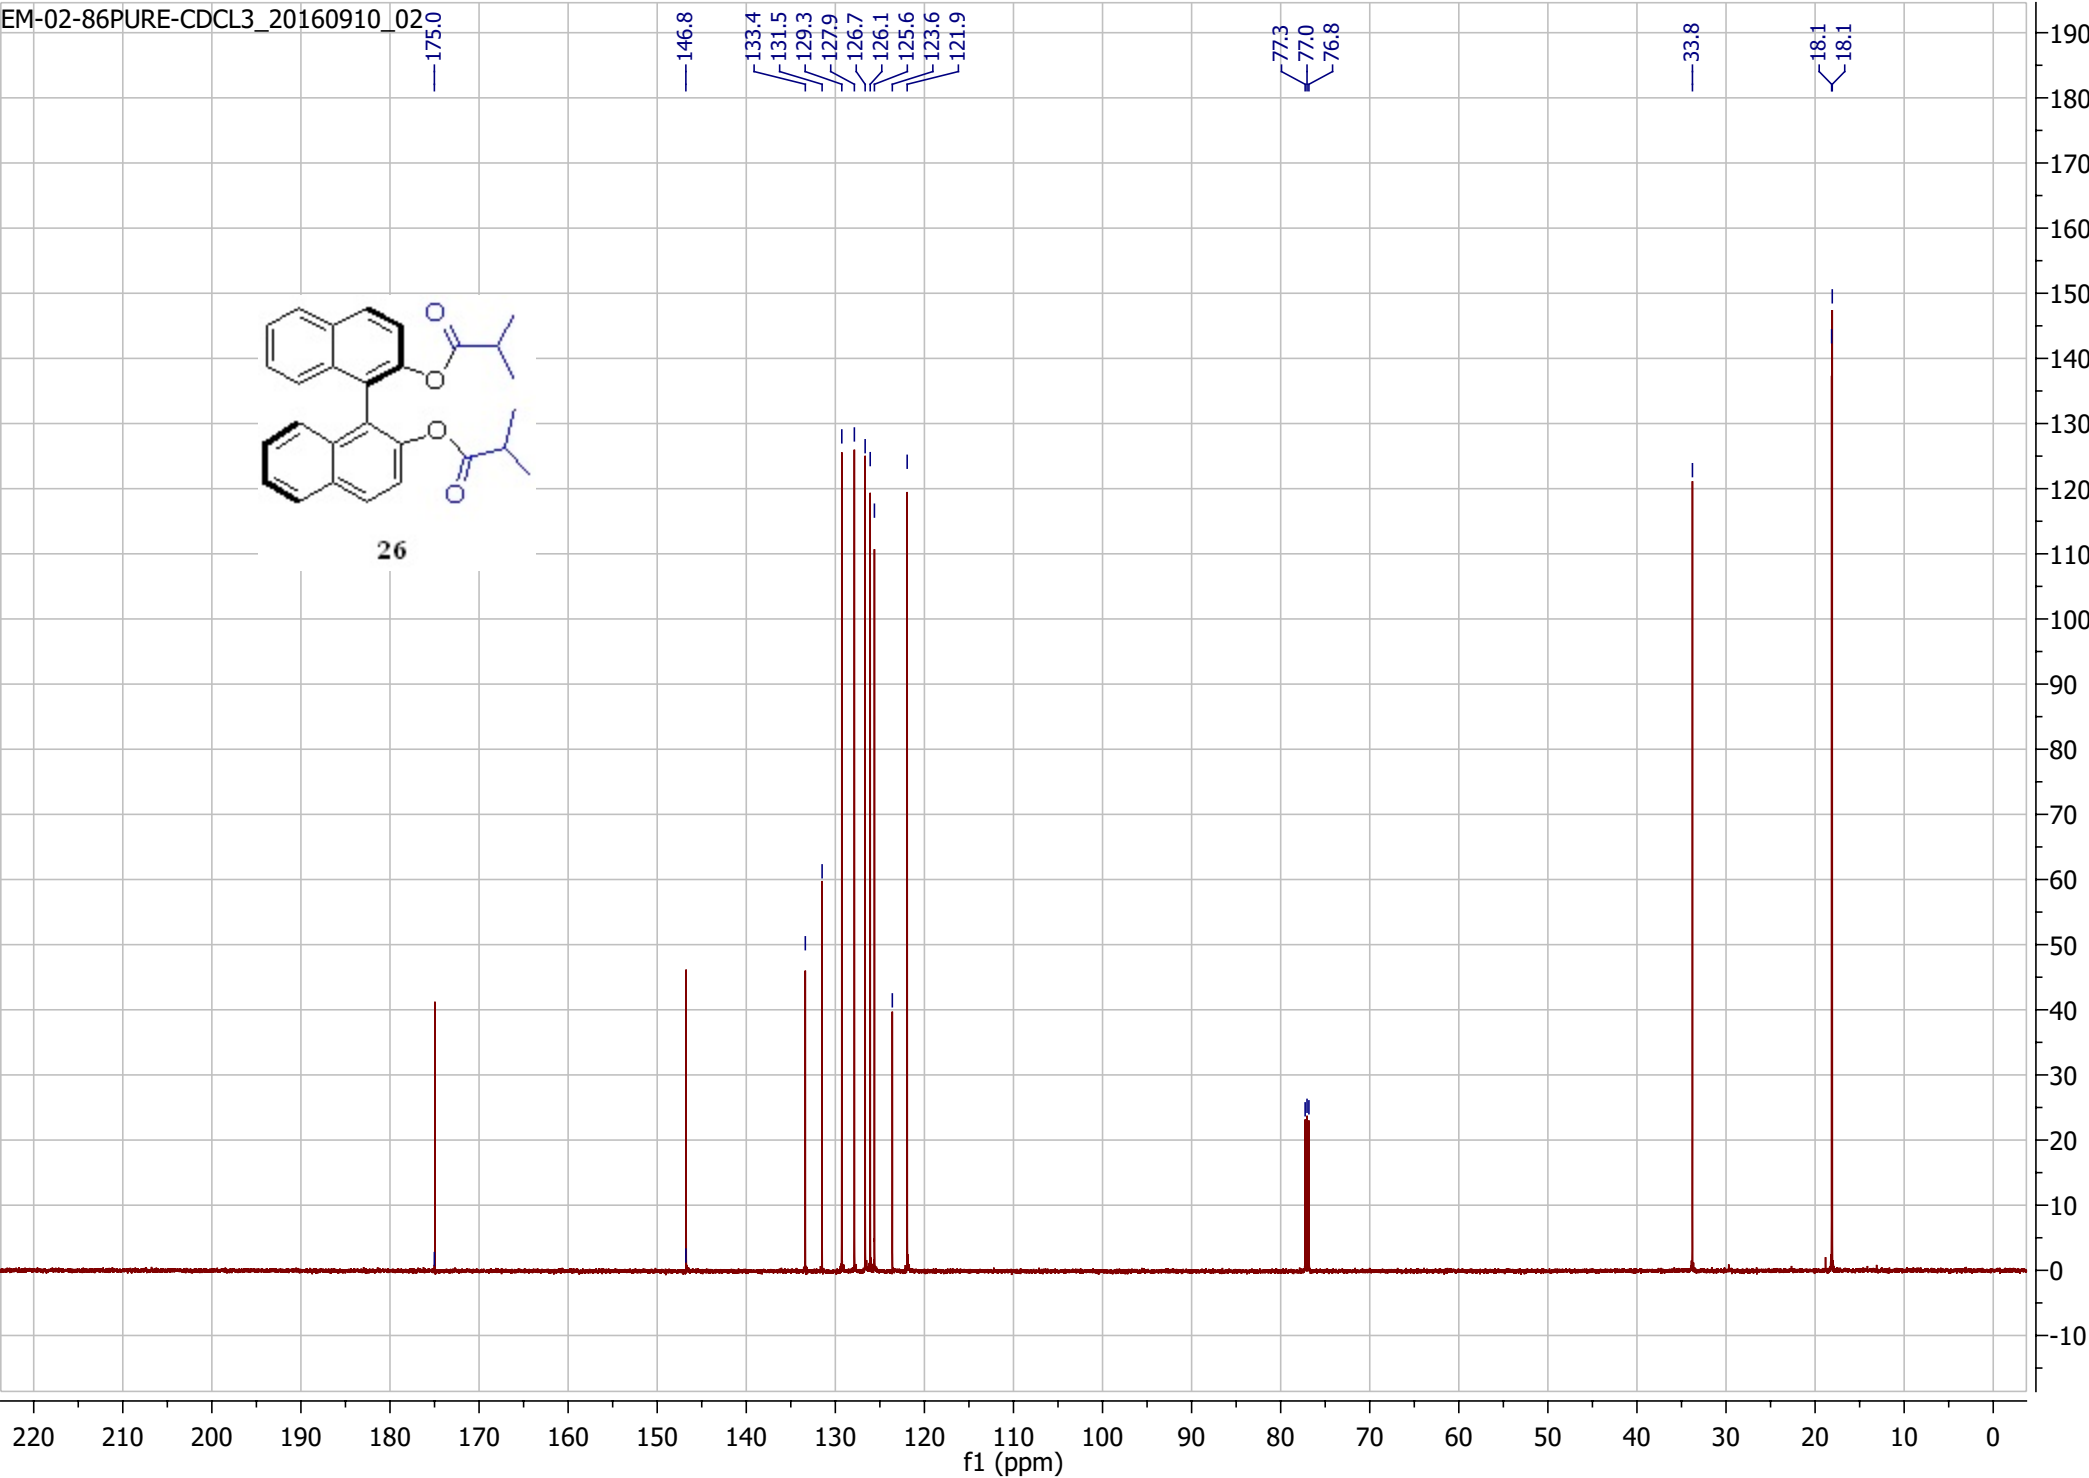

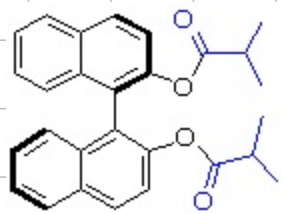

26

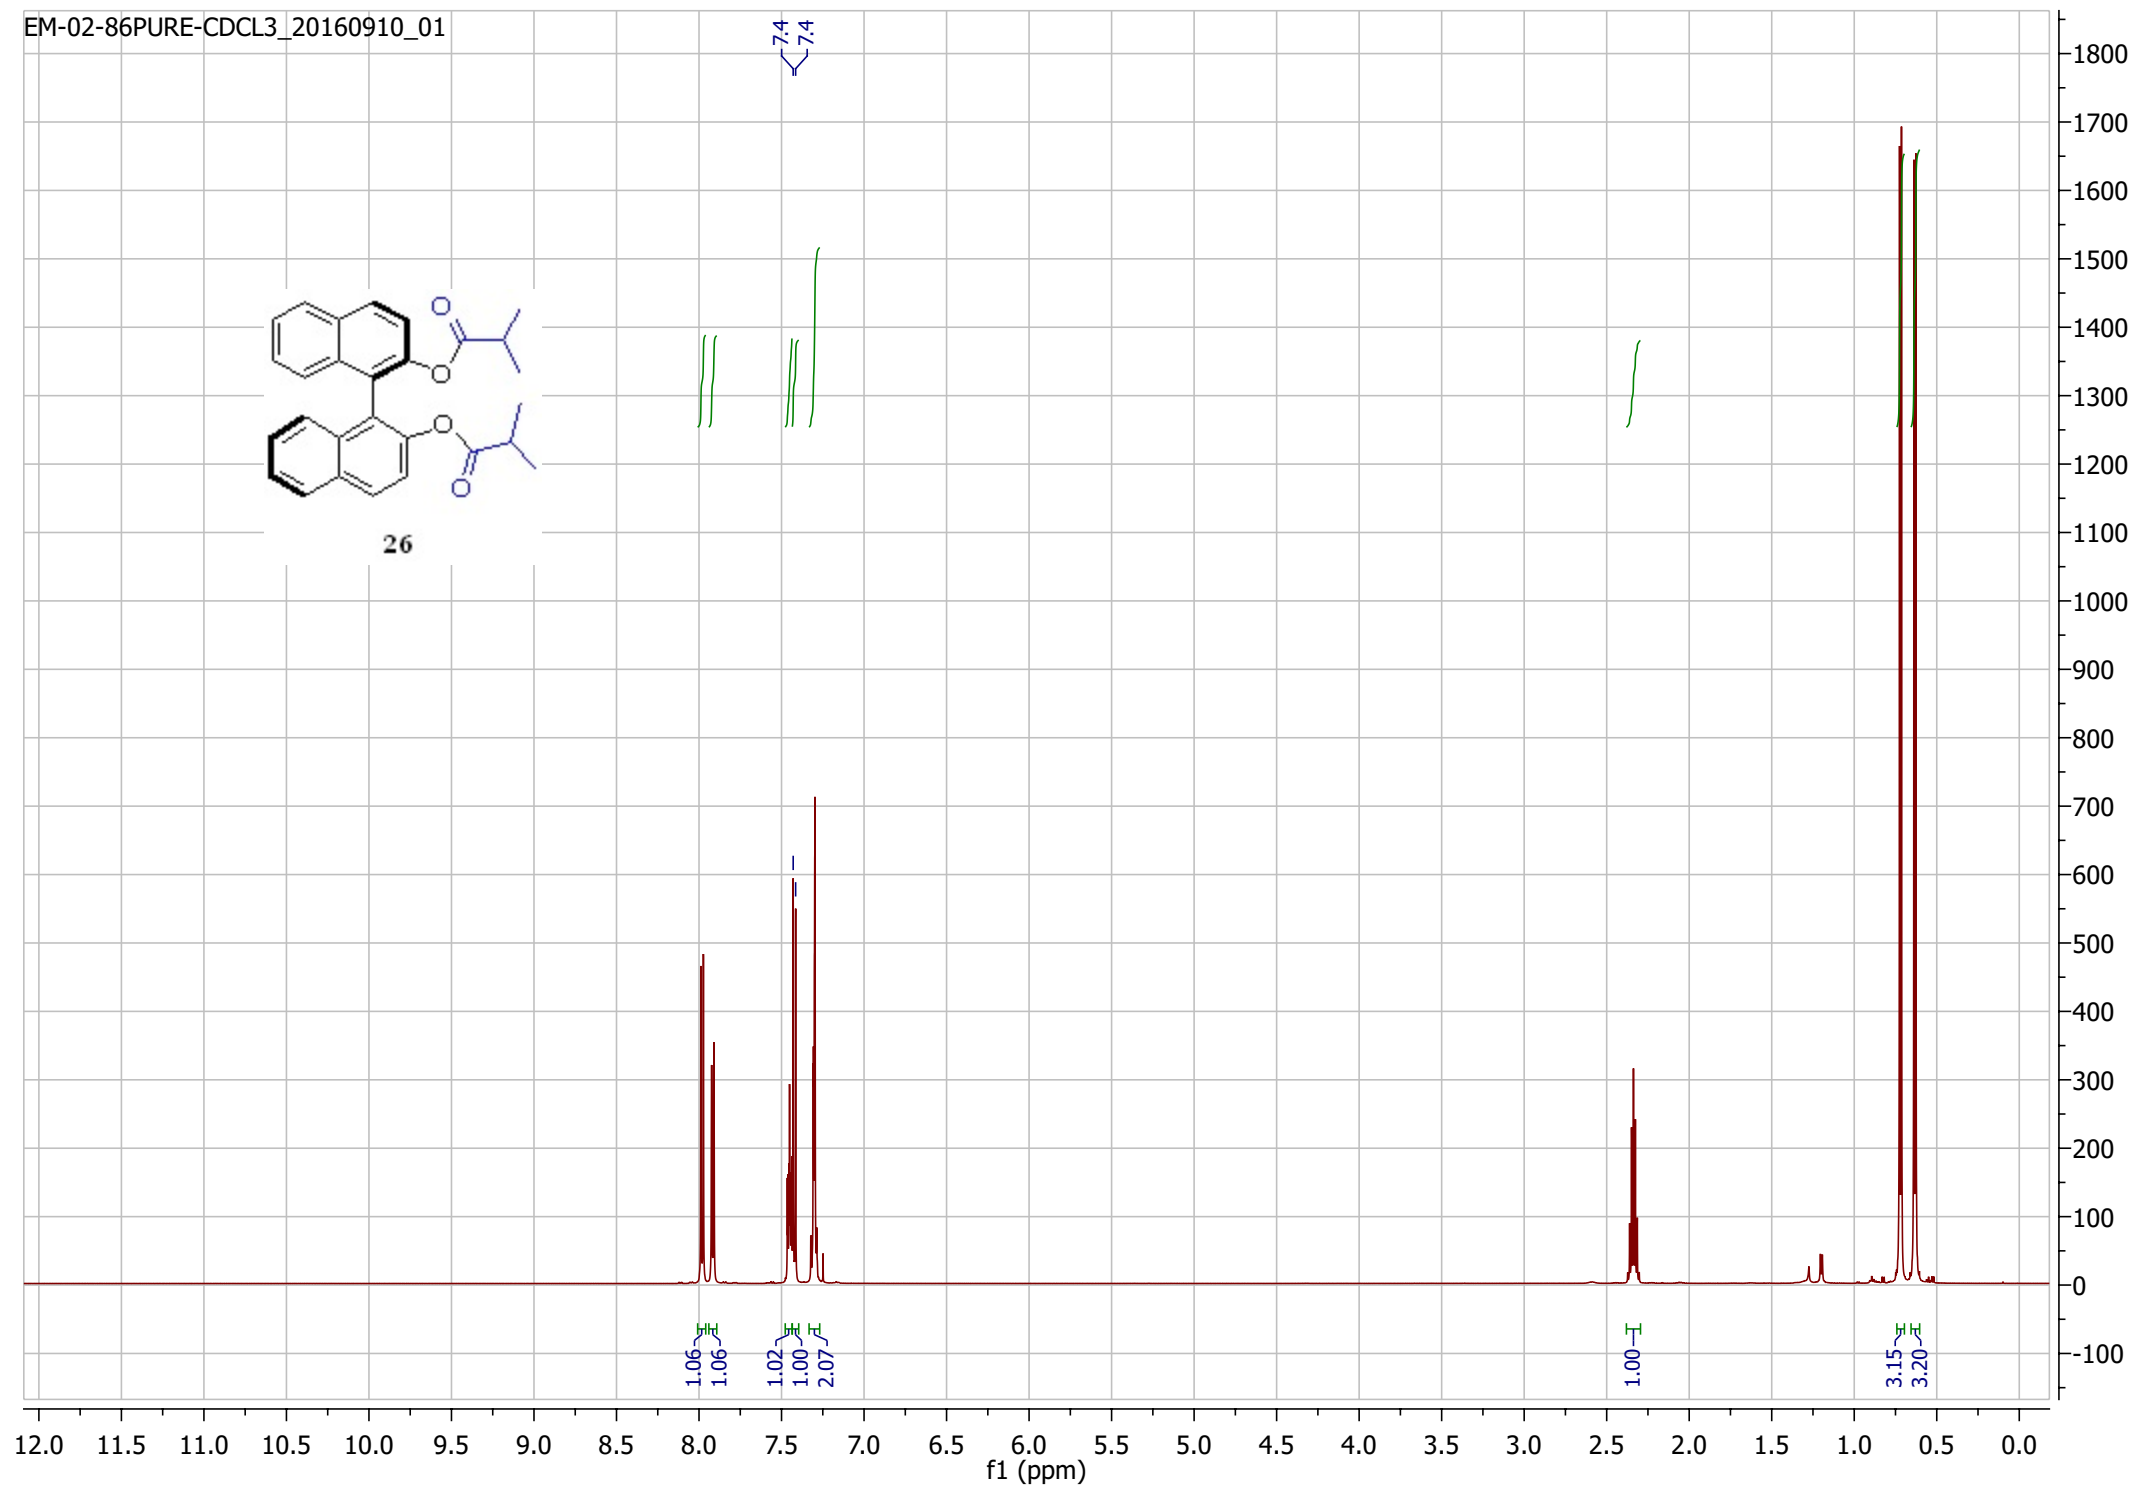

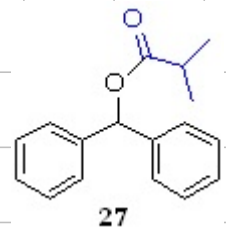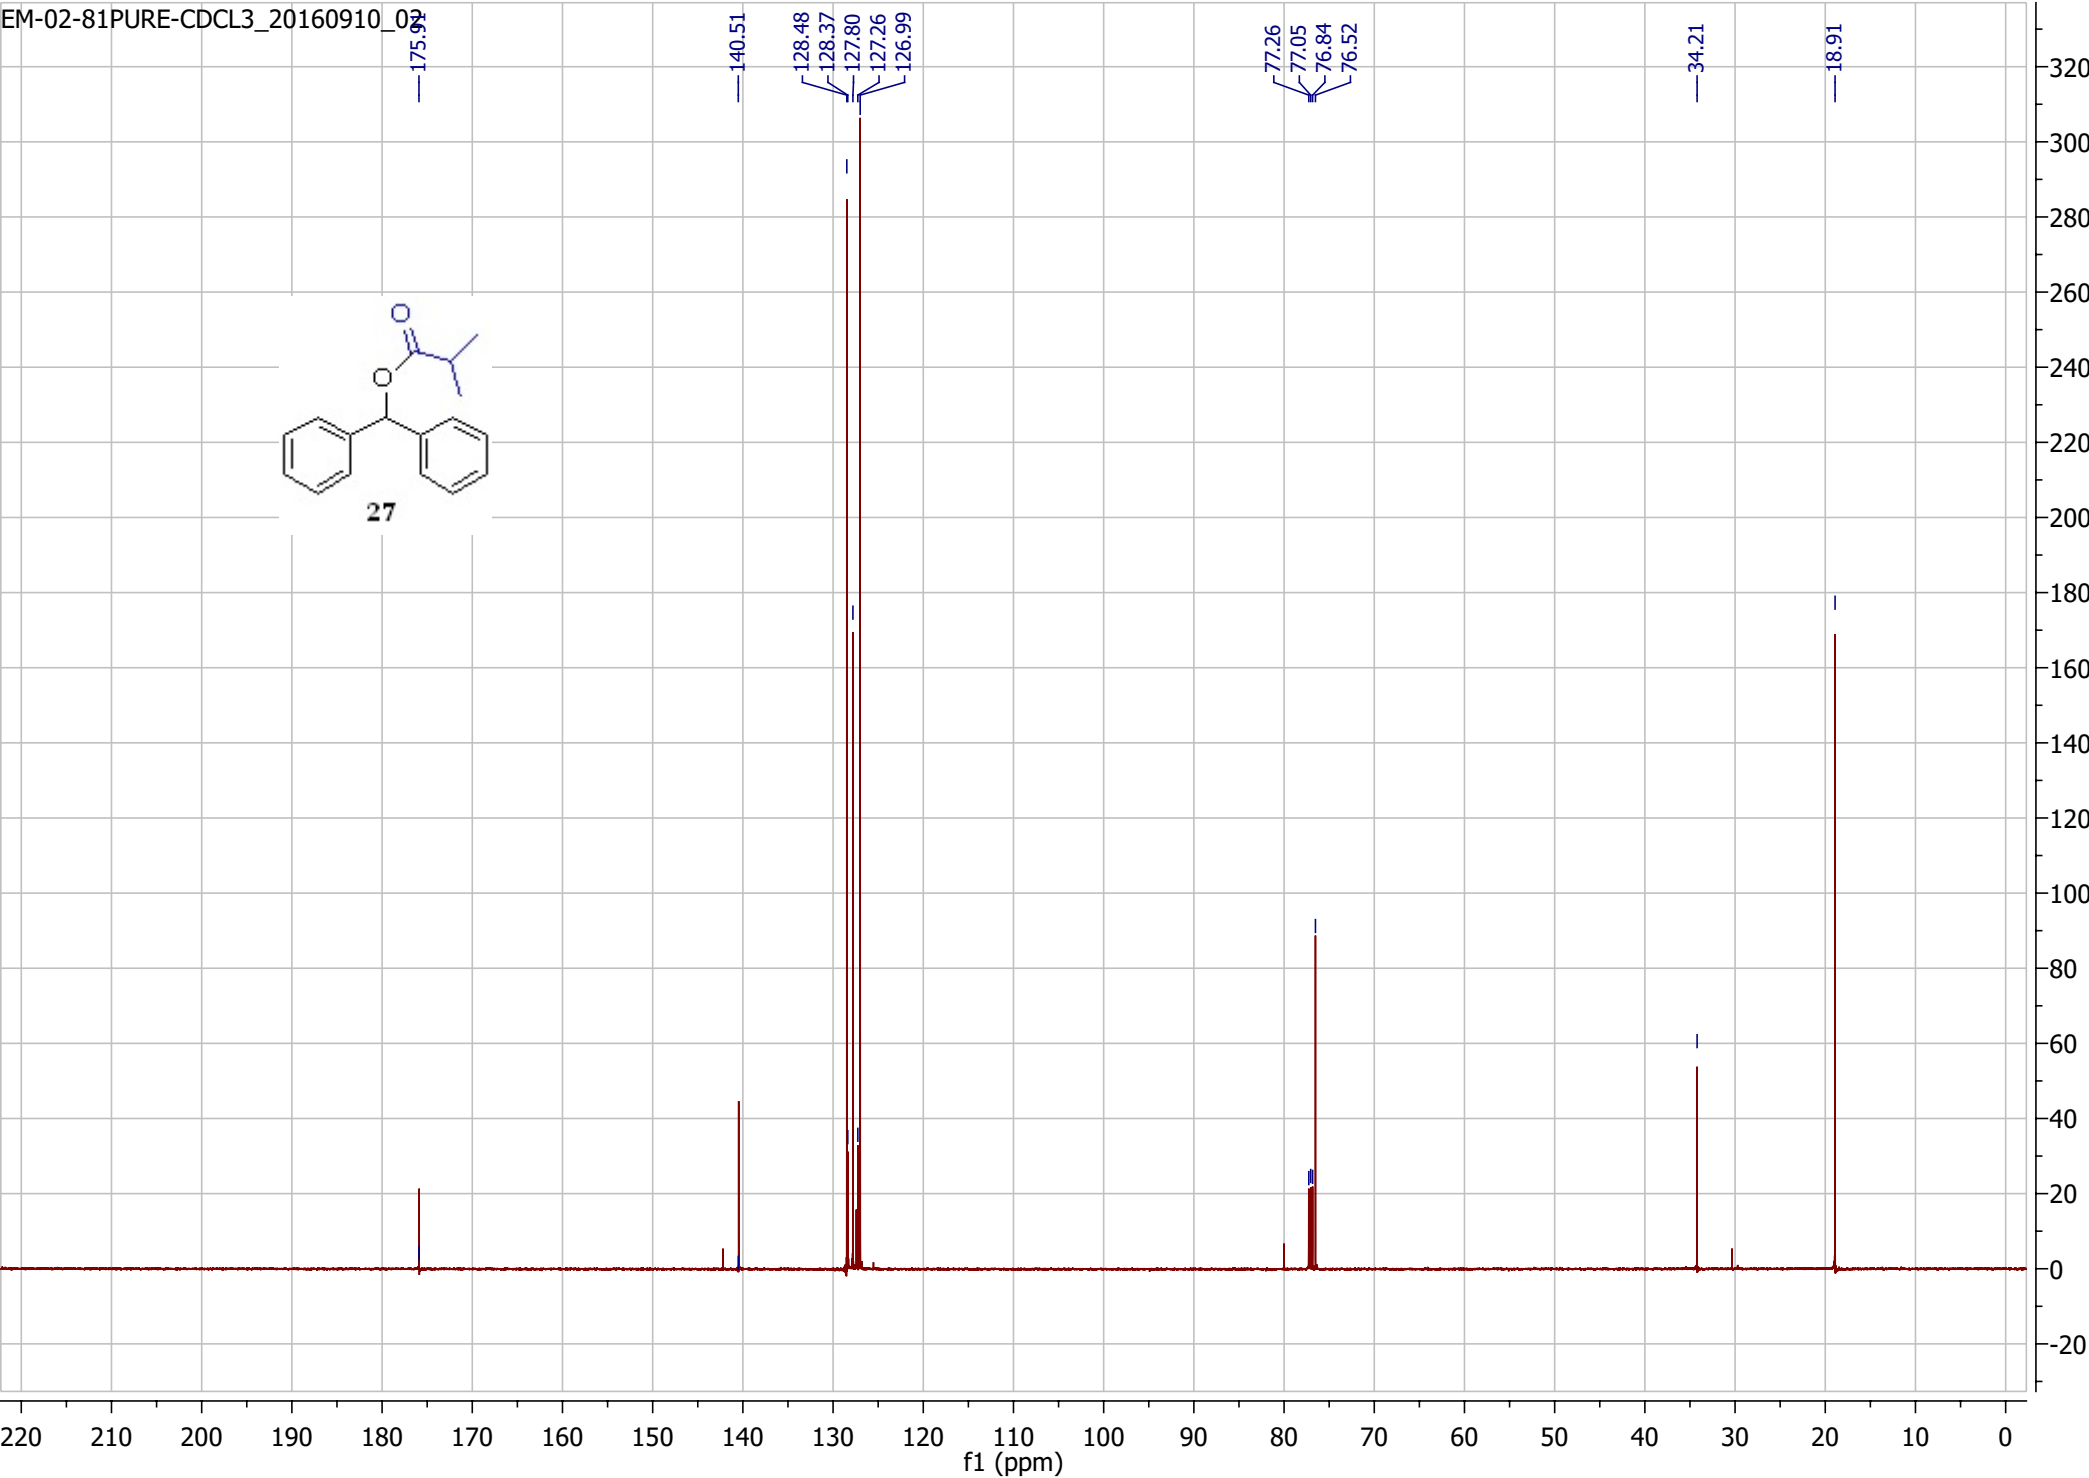

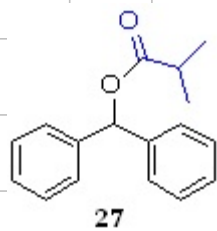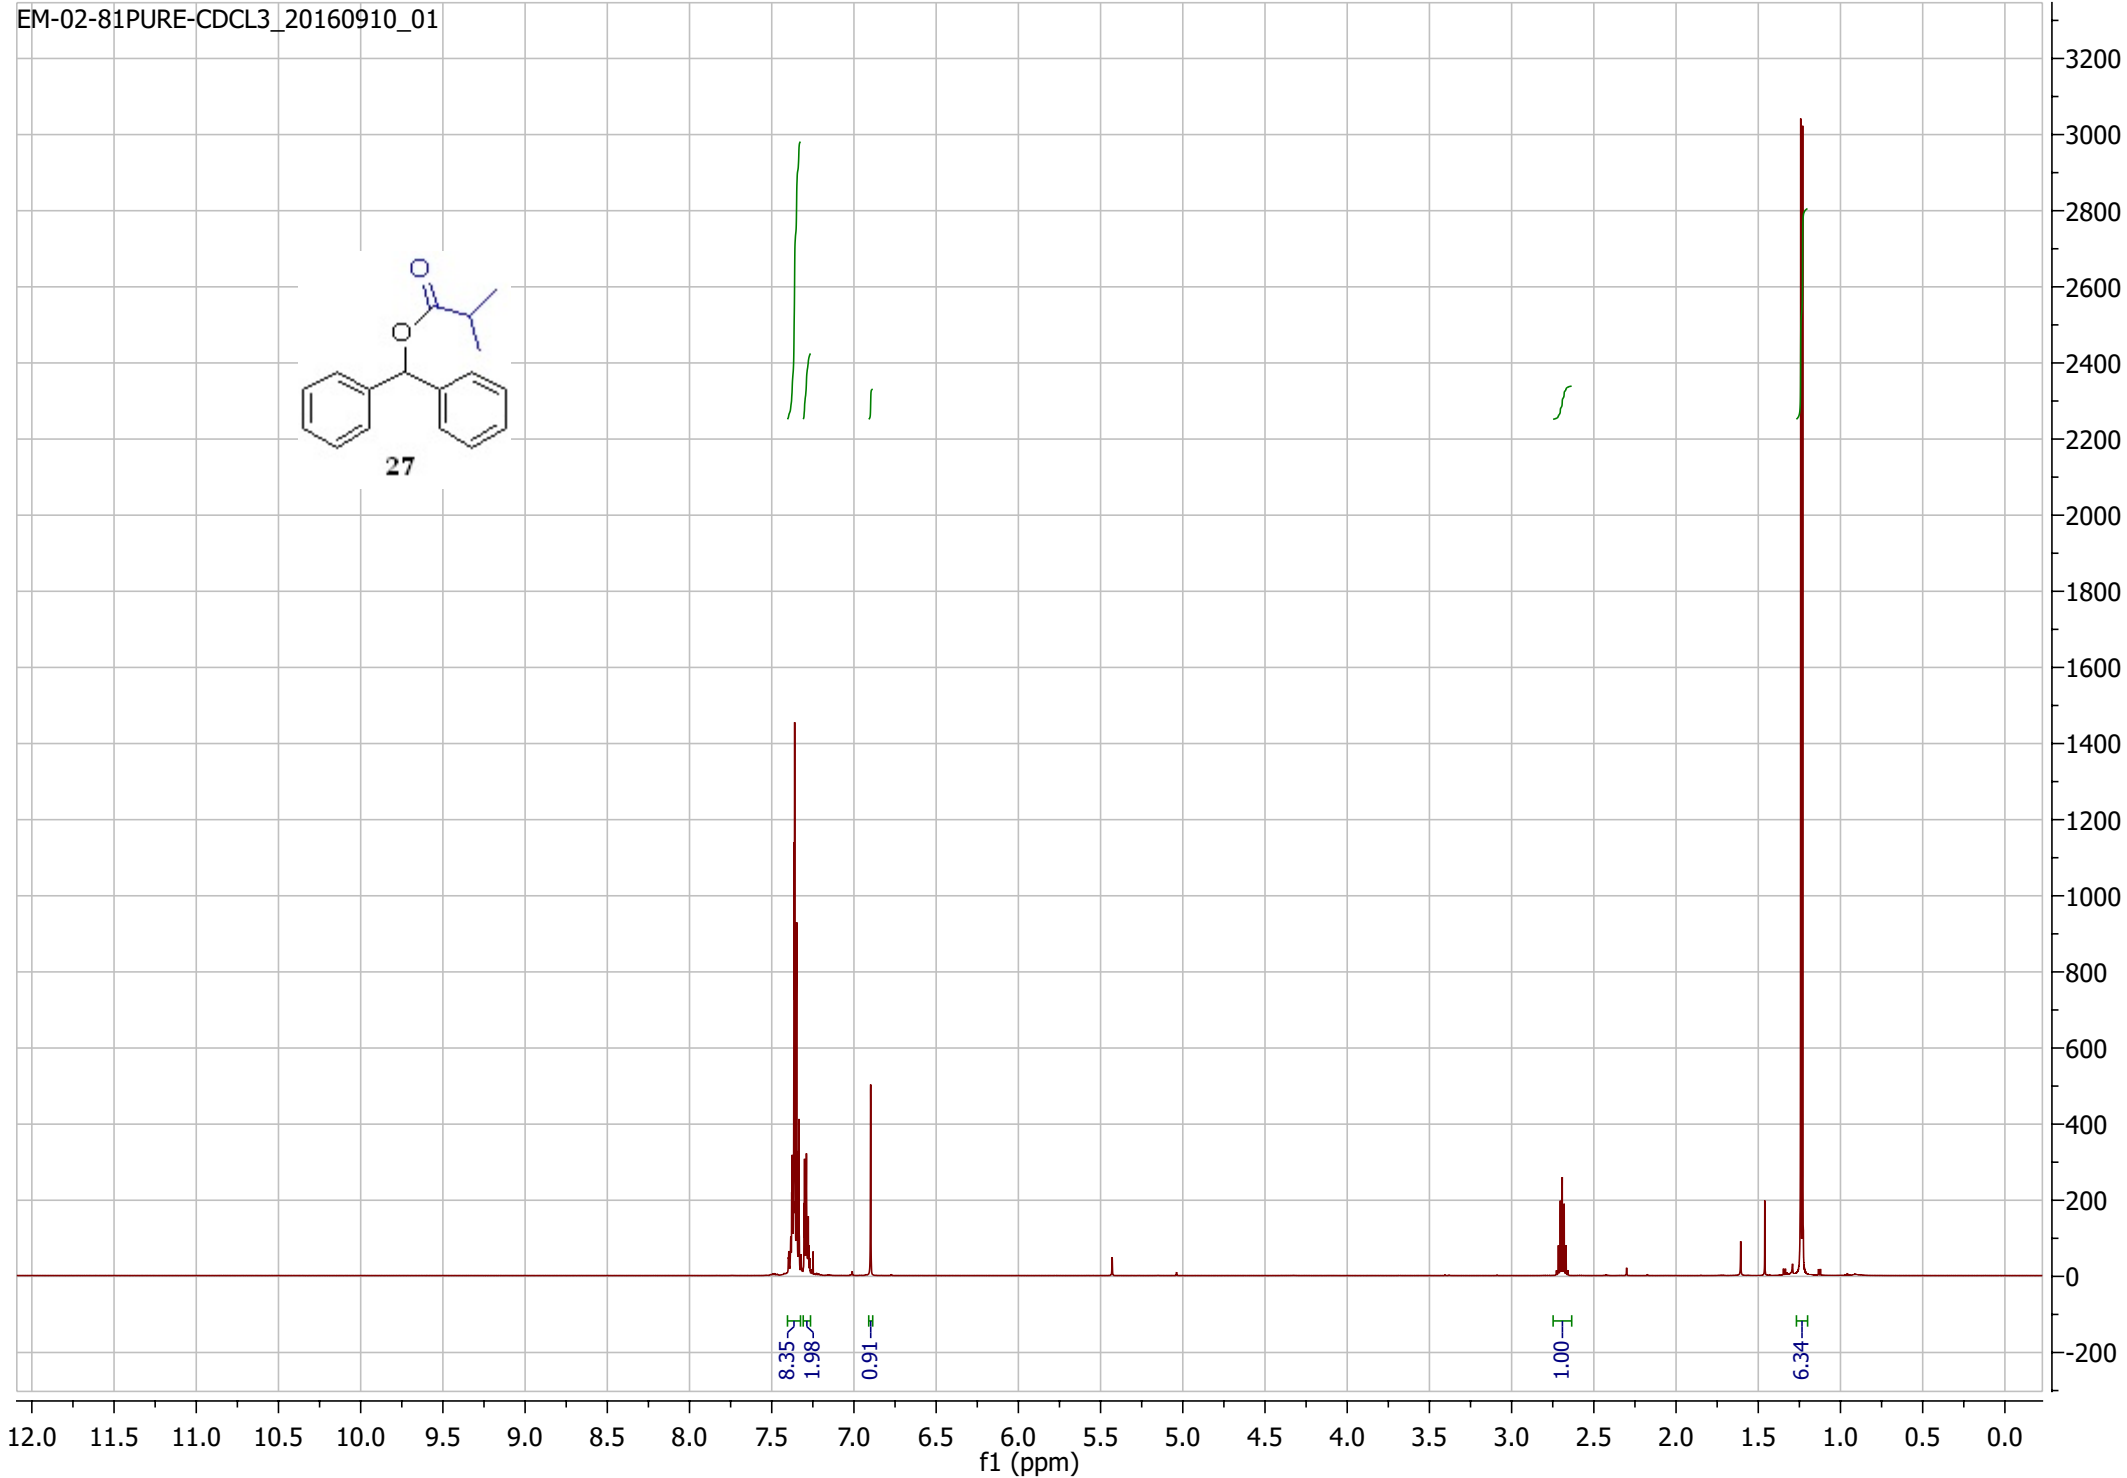



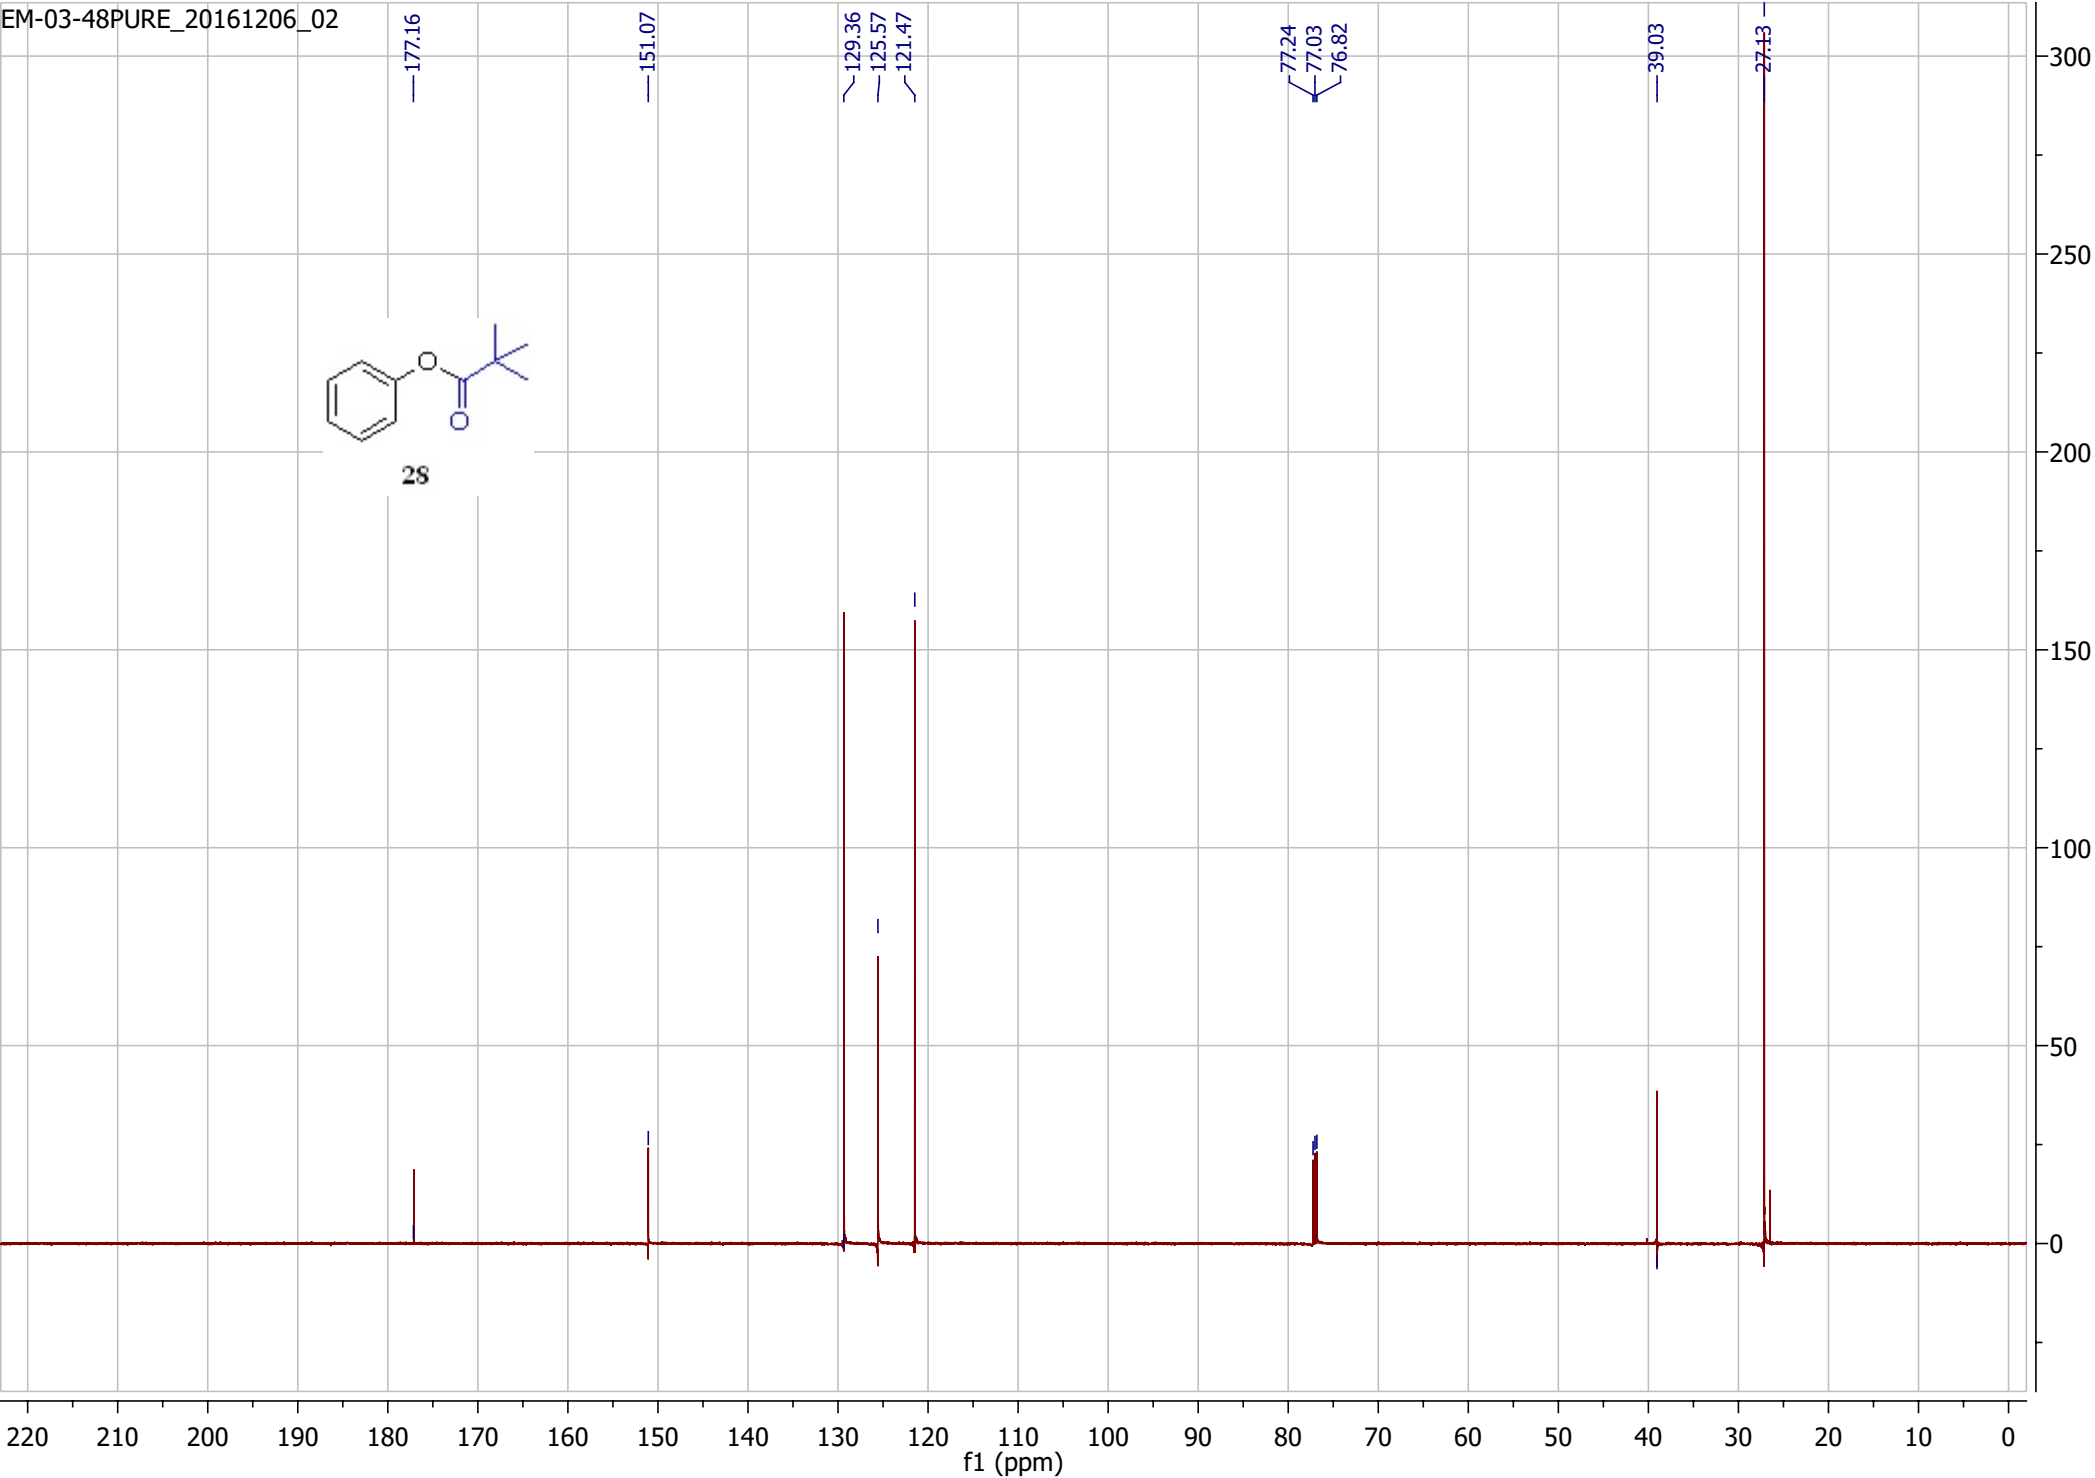

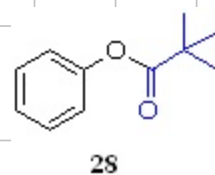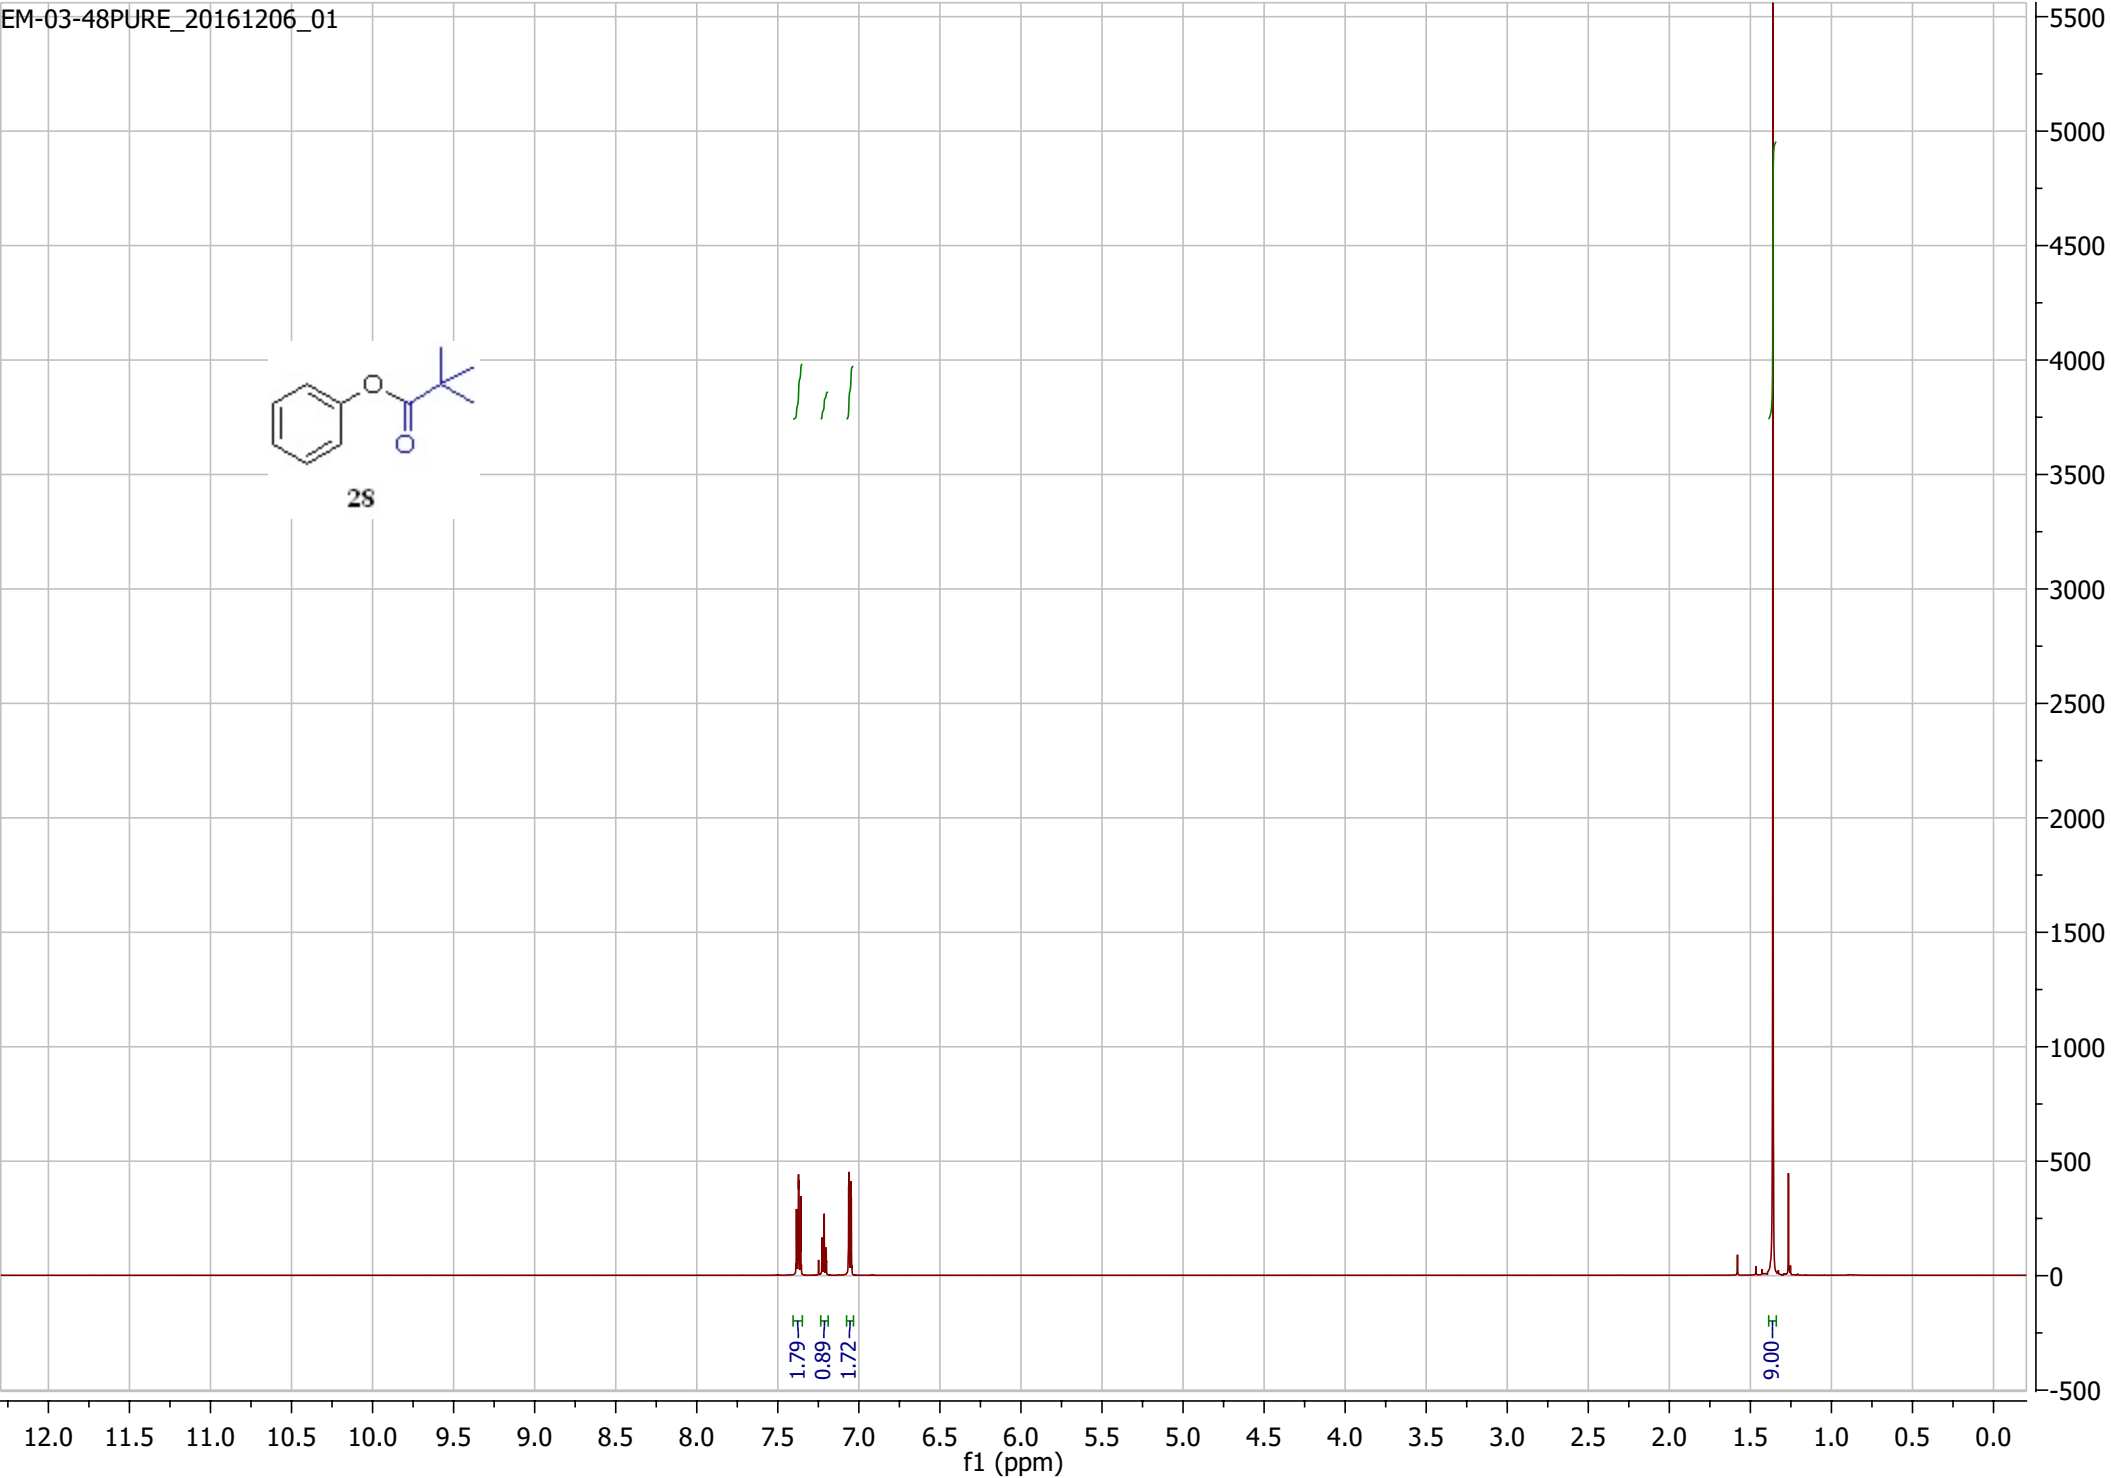

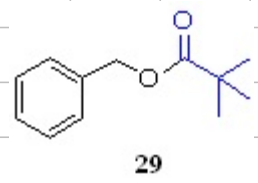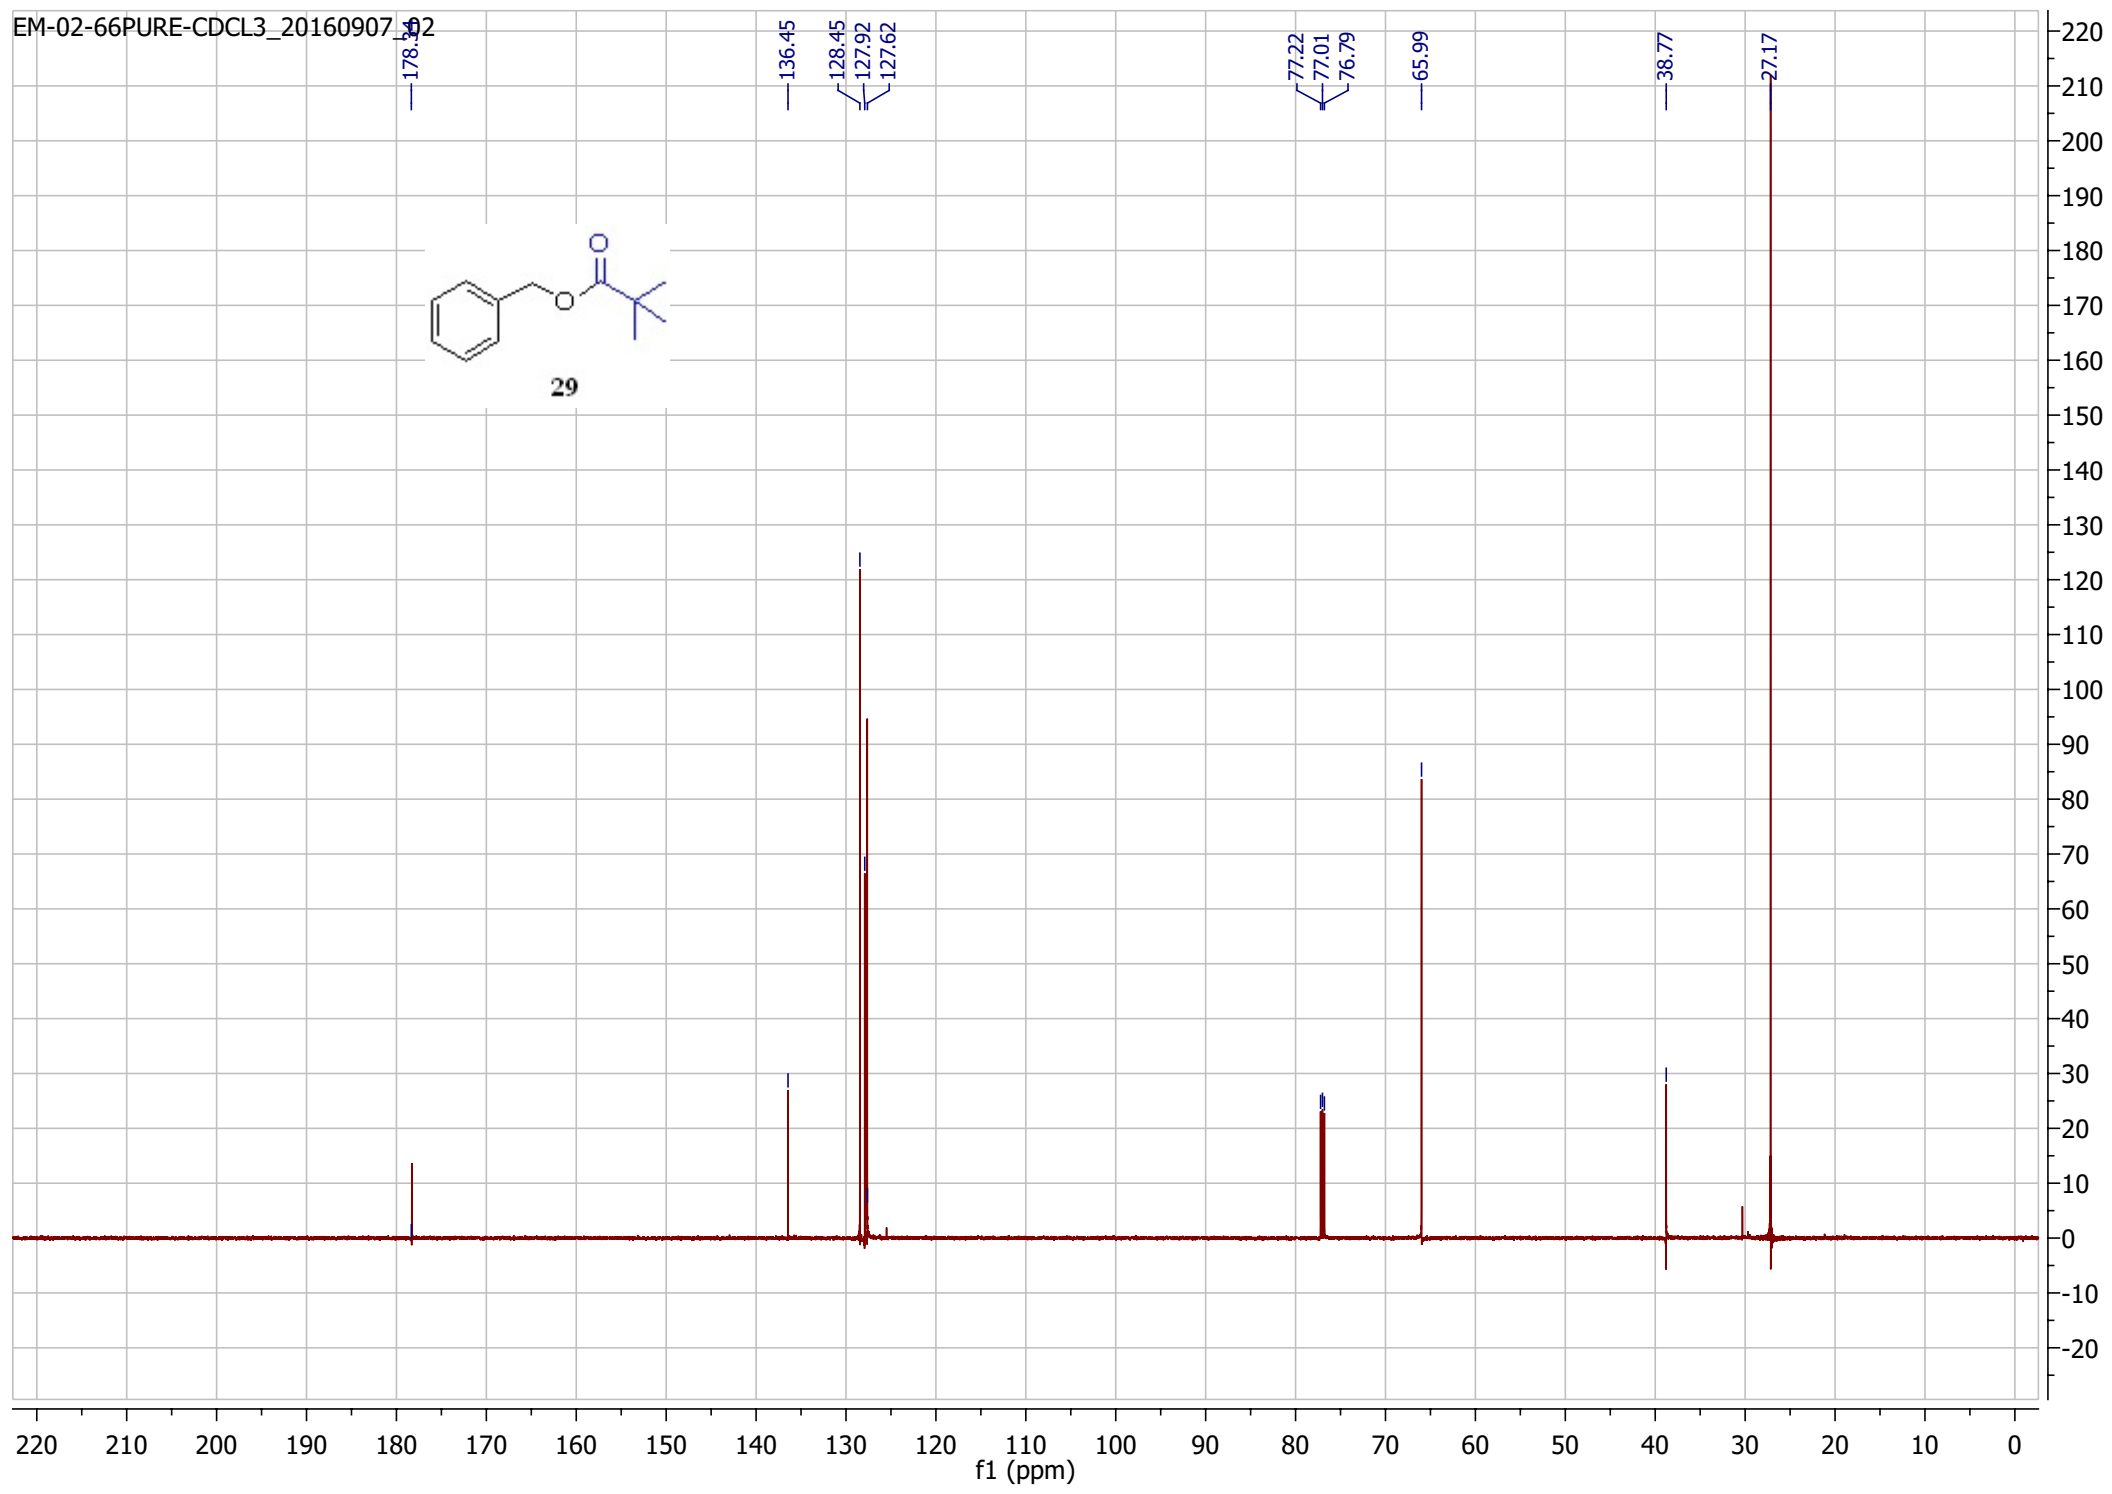

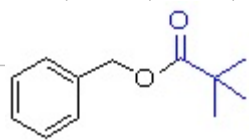

29

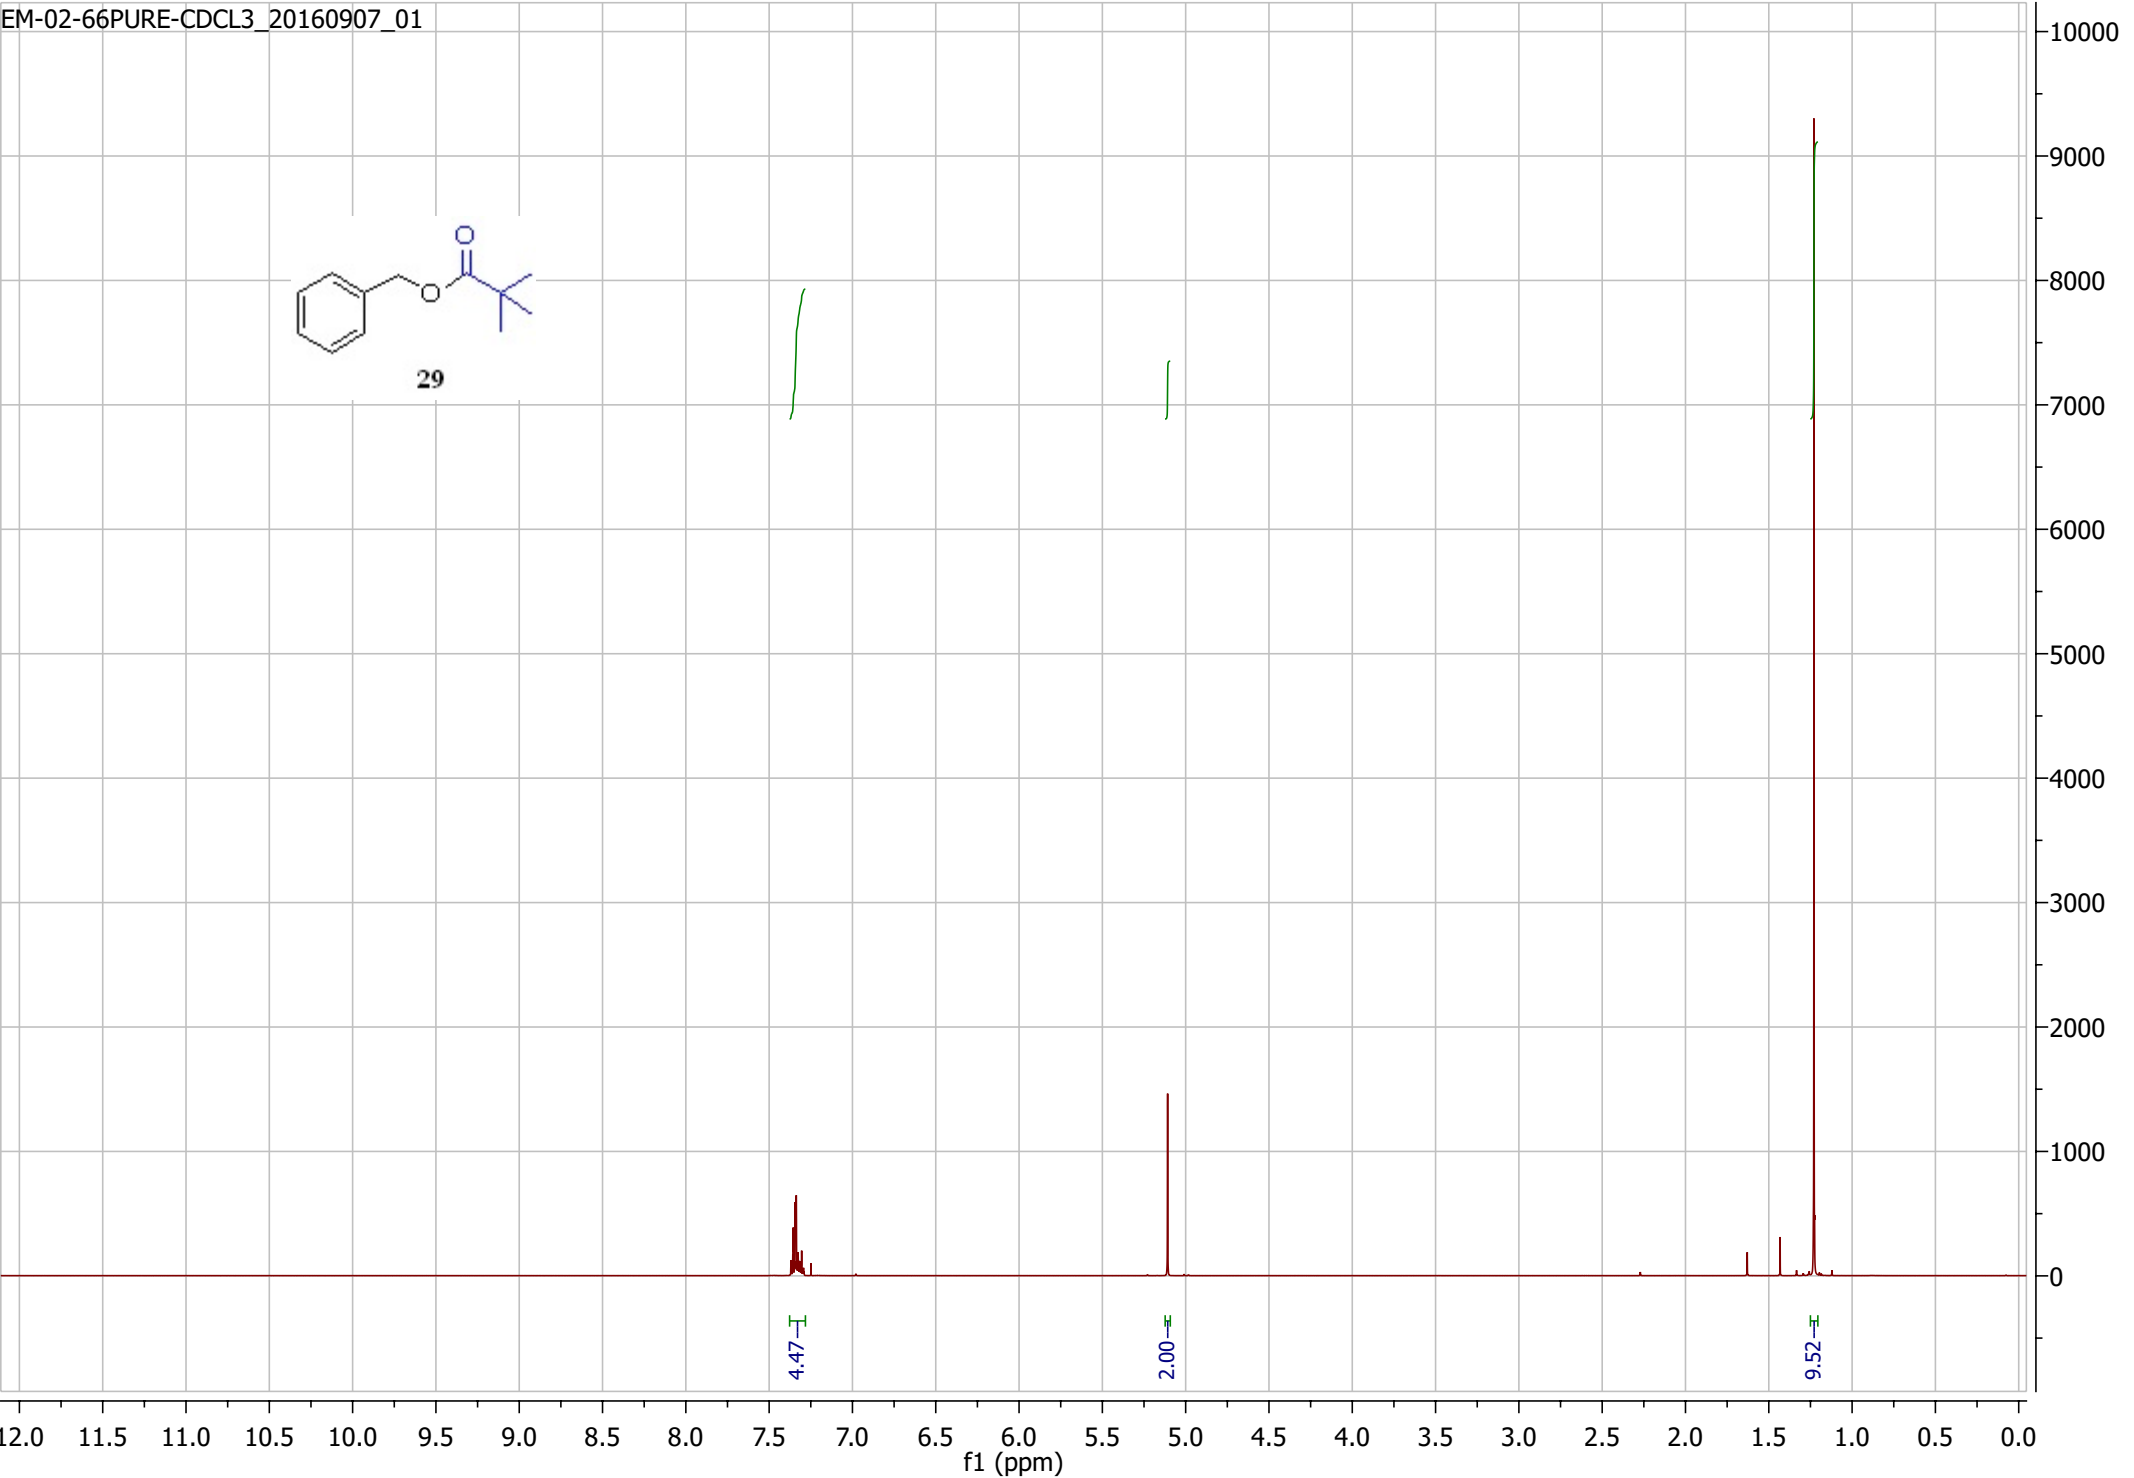

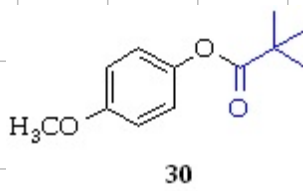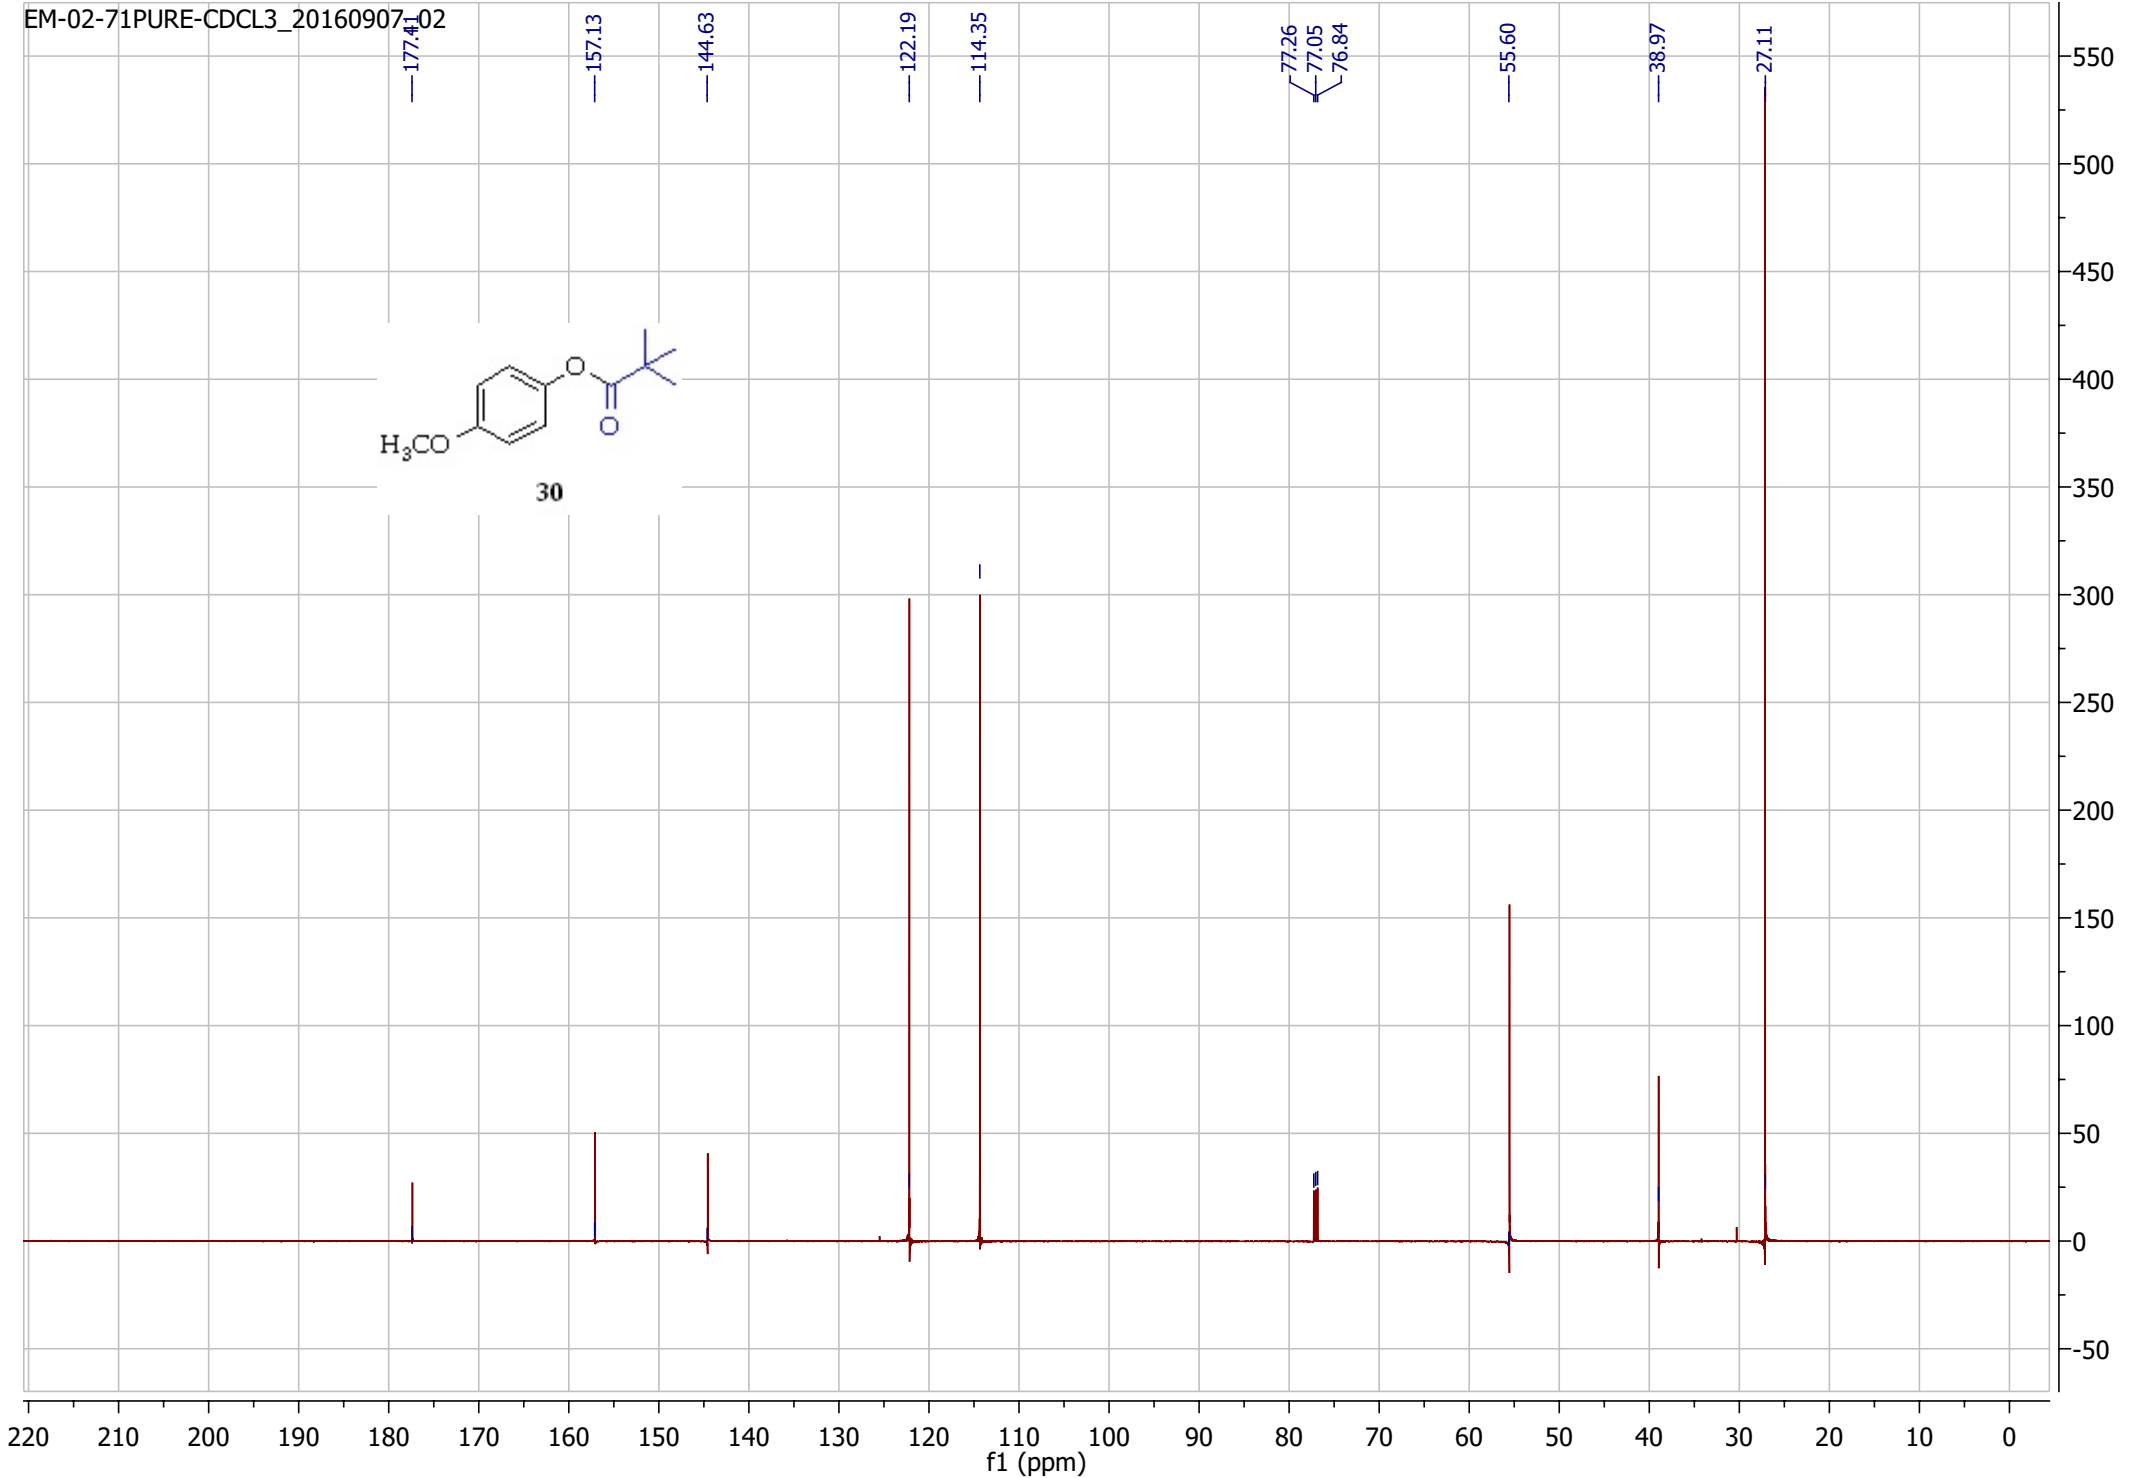

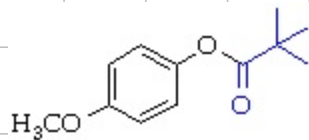

30

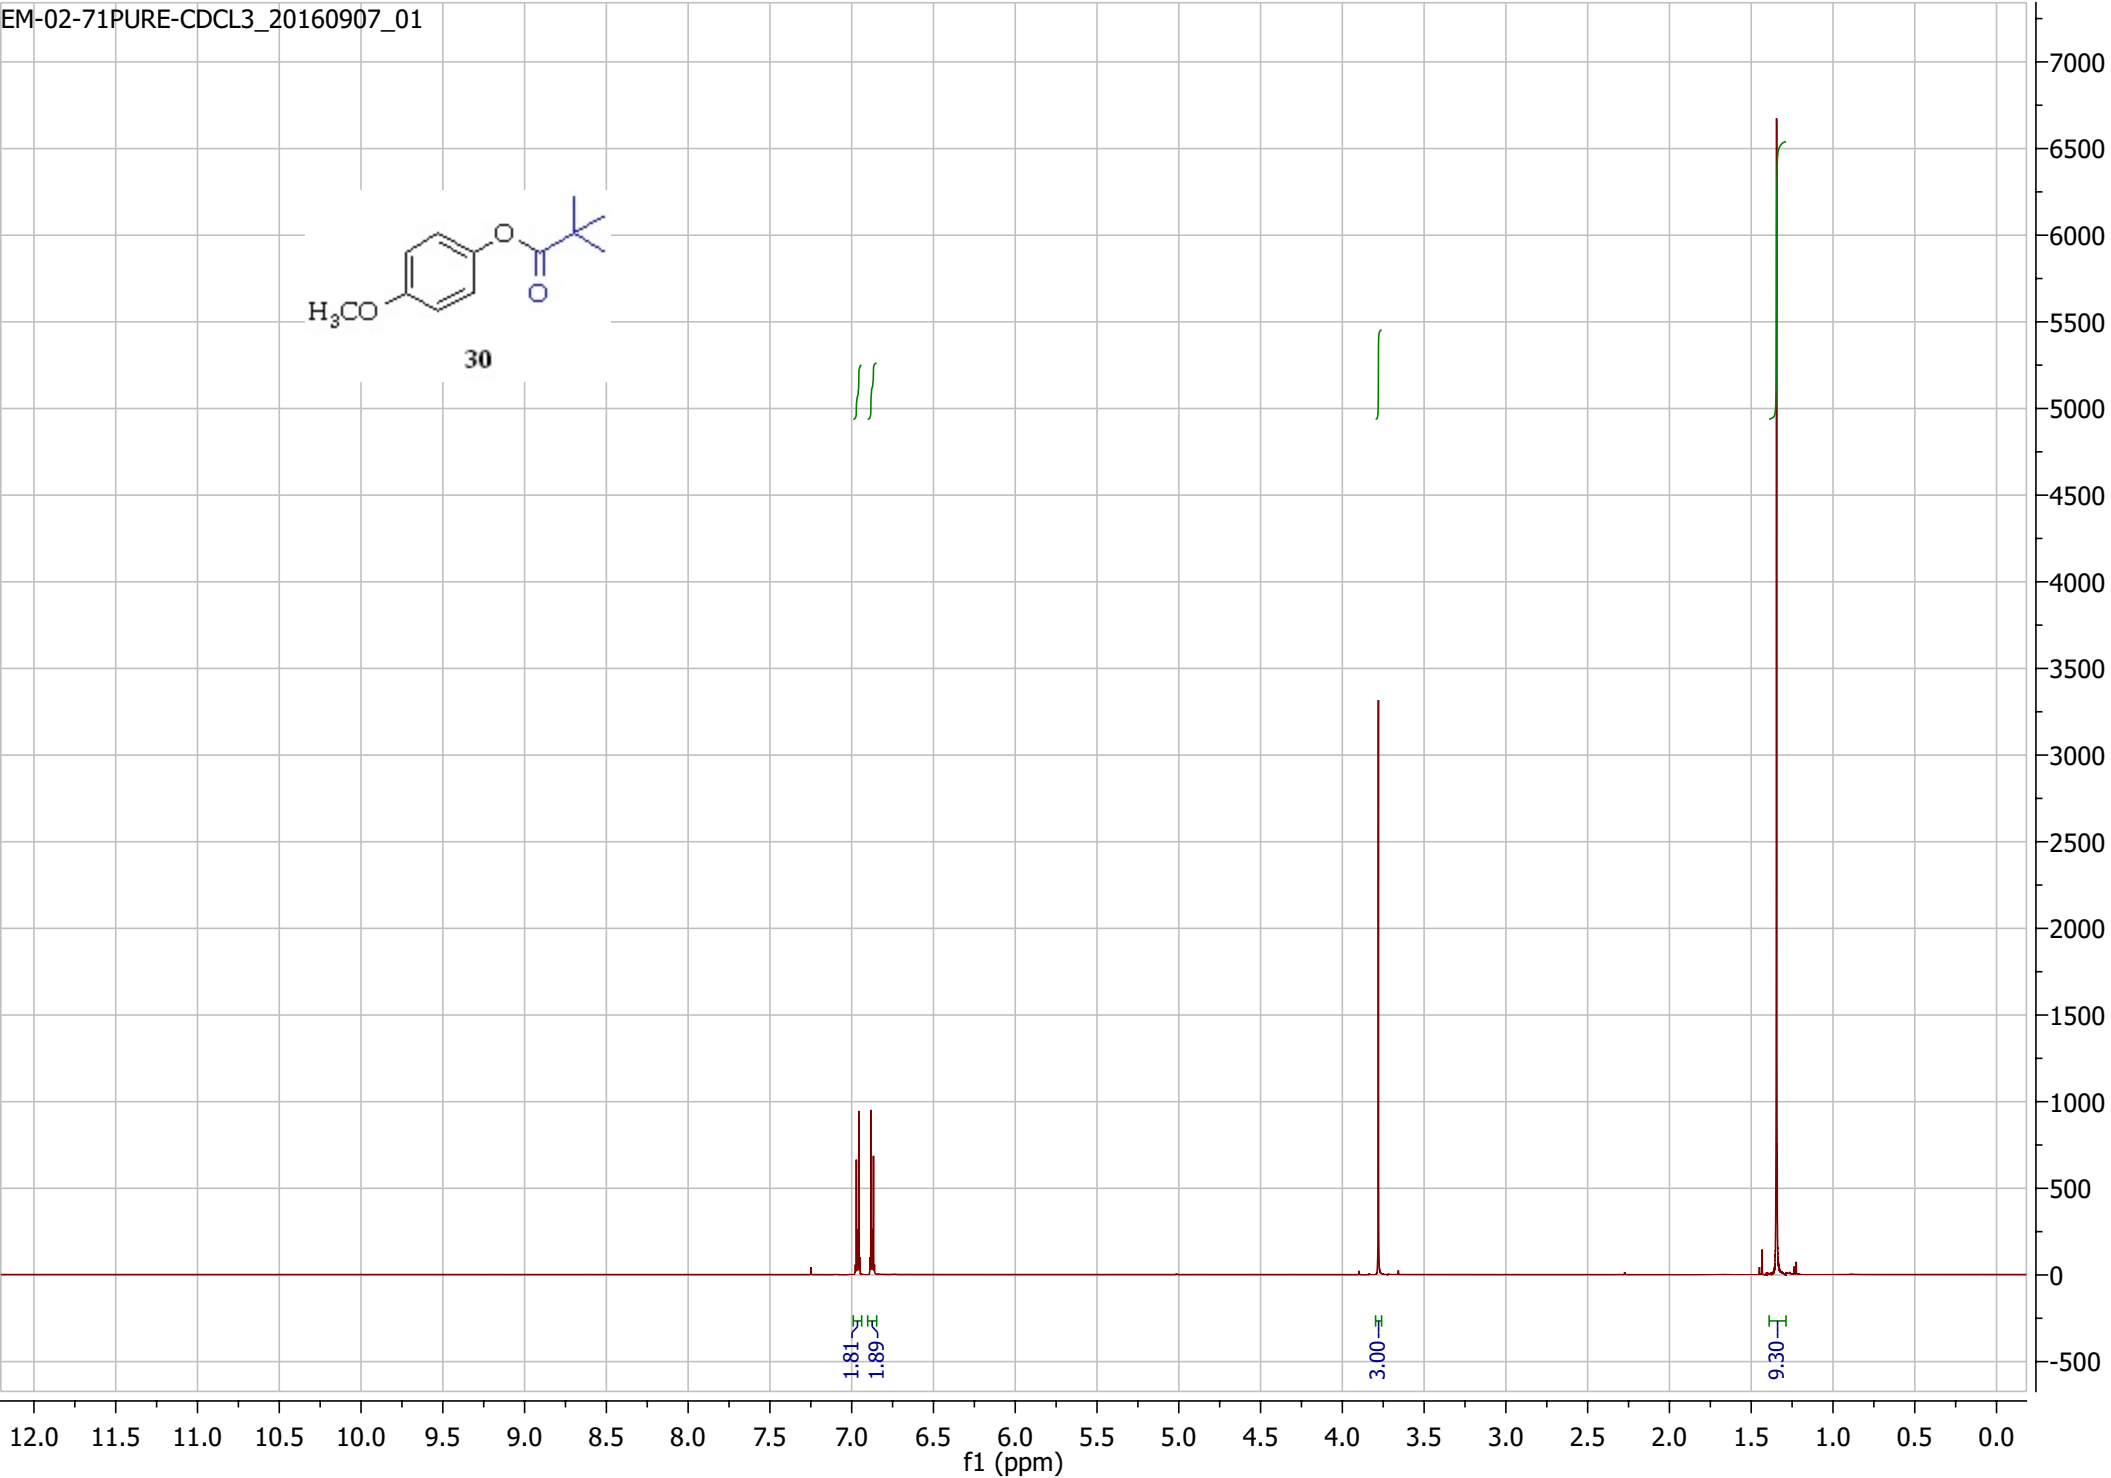

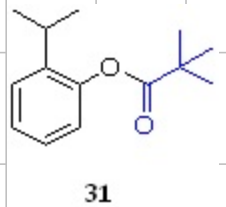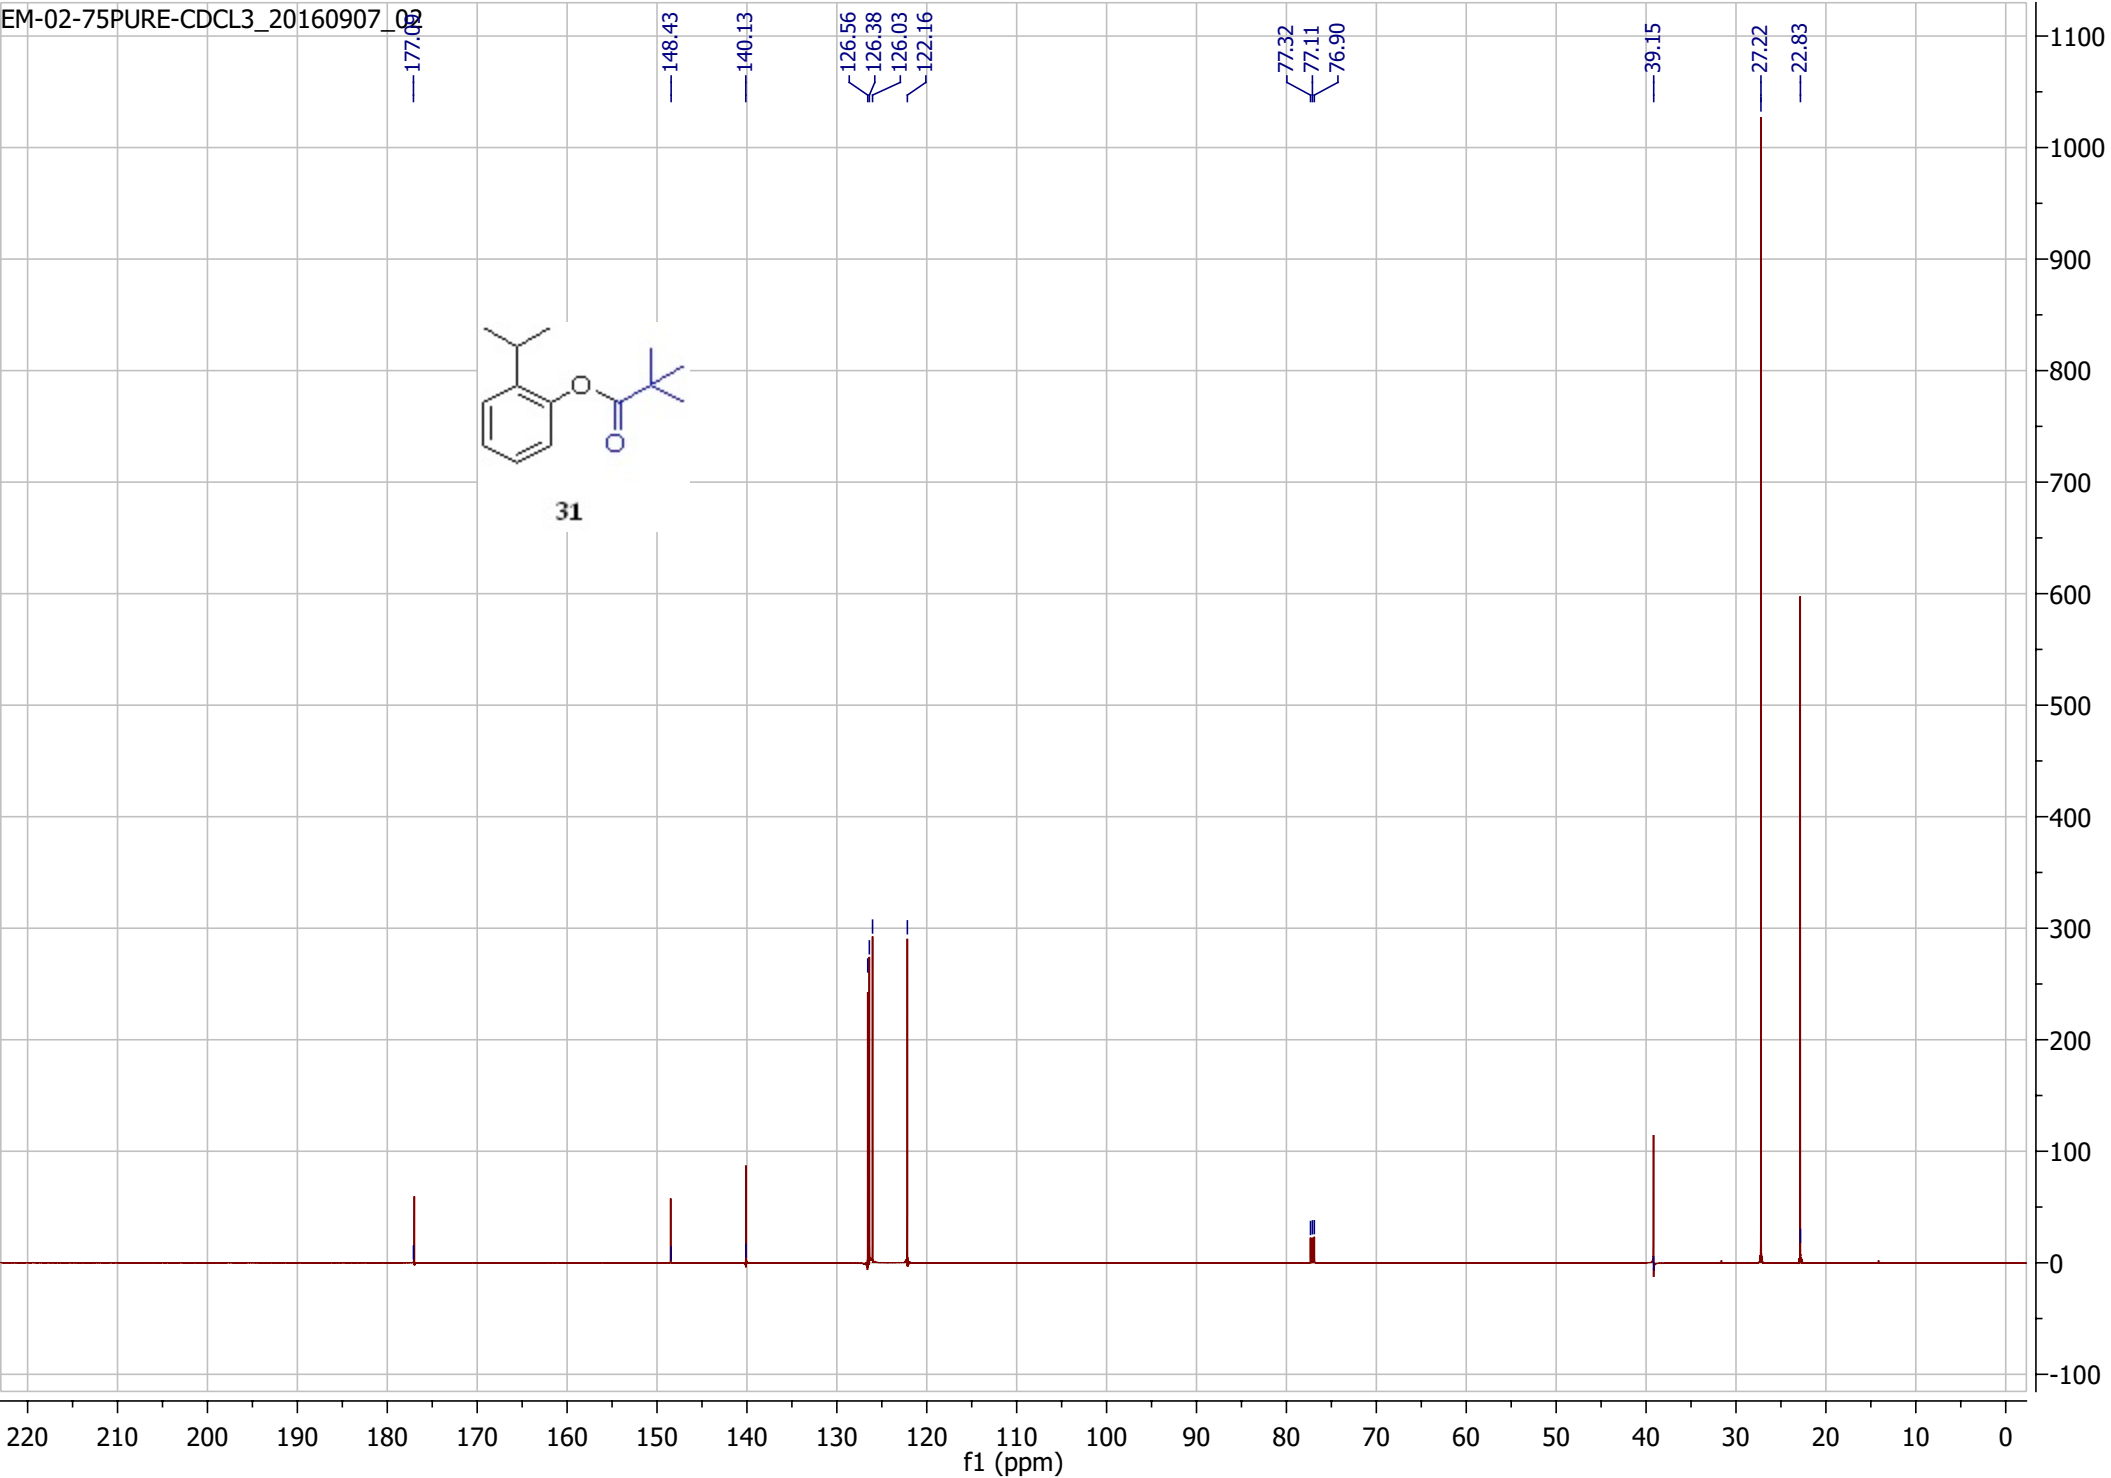

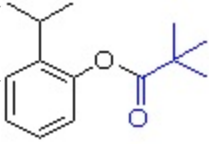

31

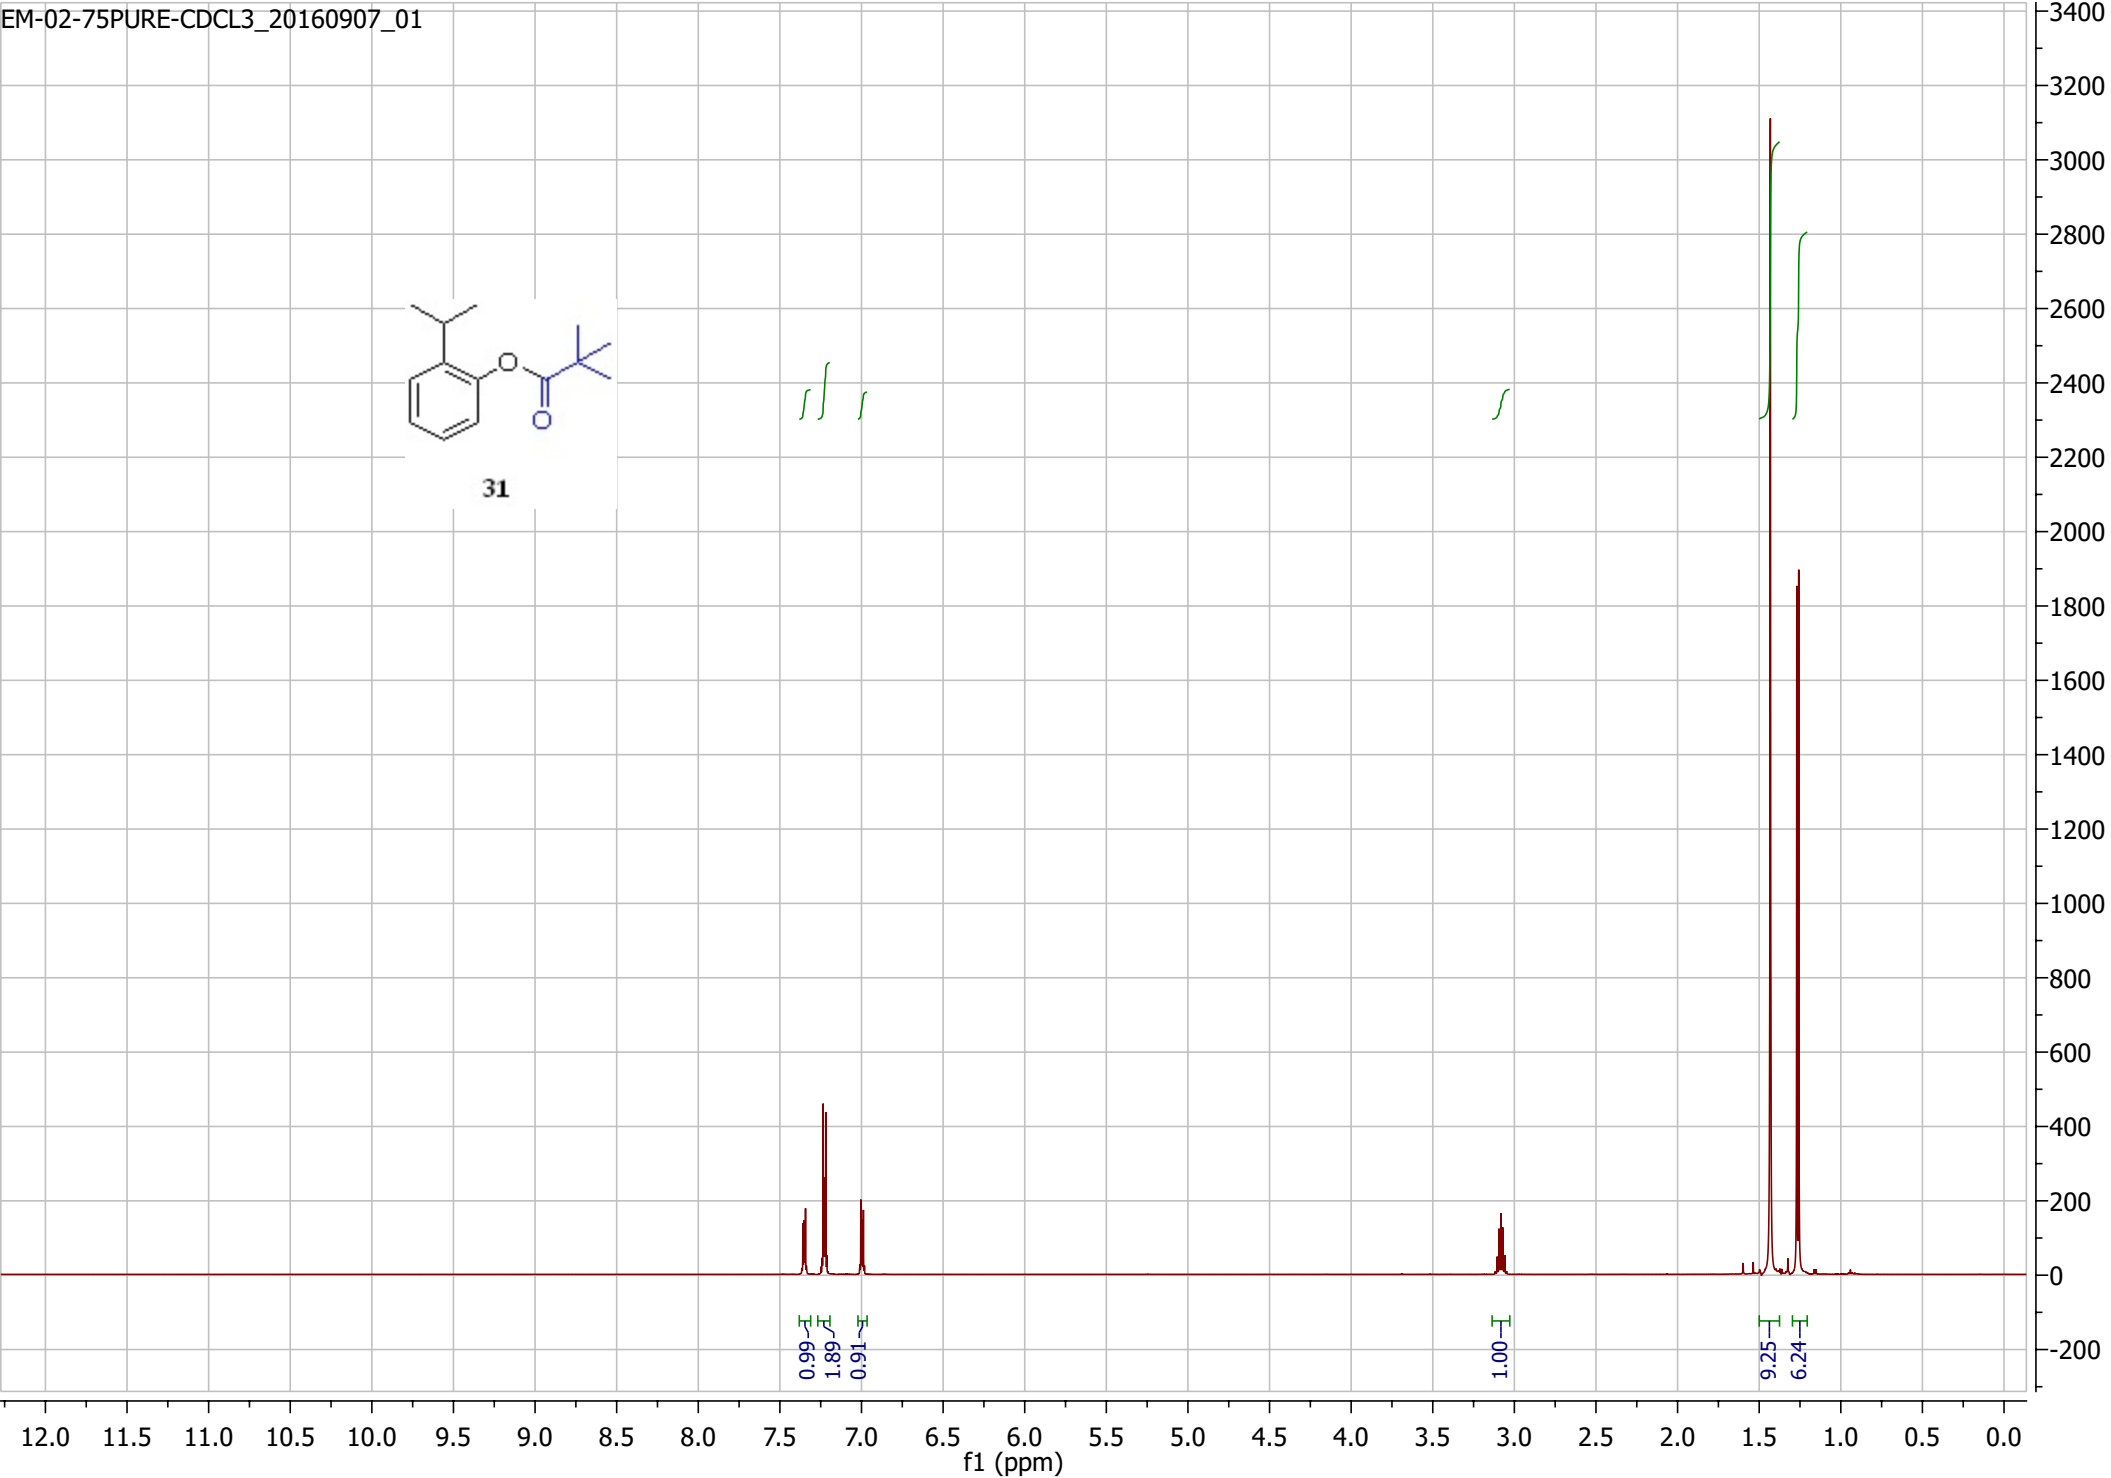



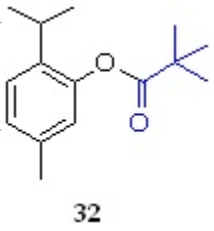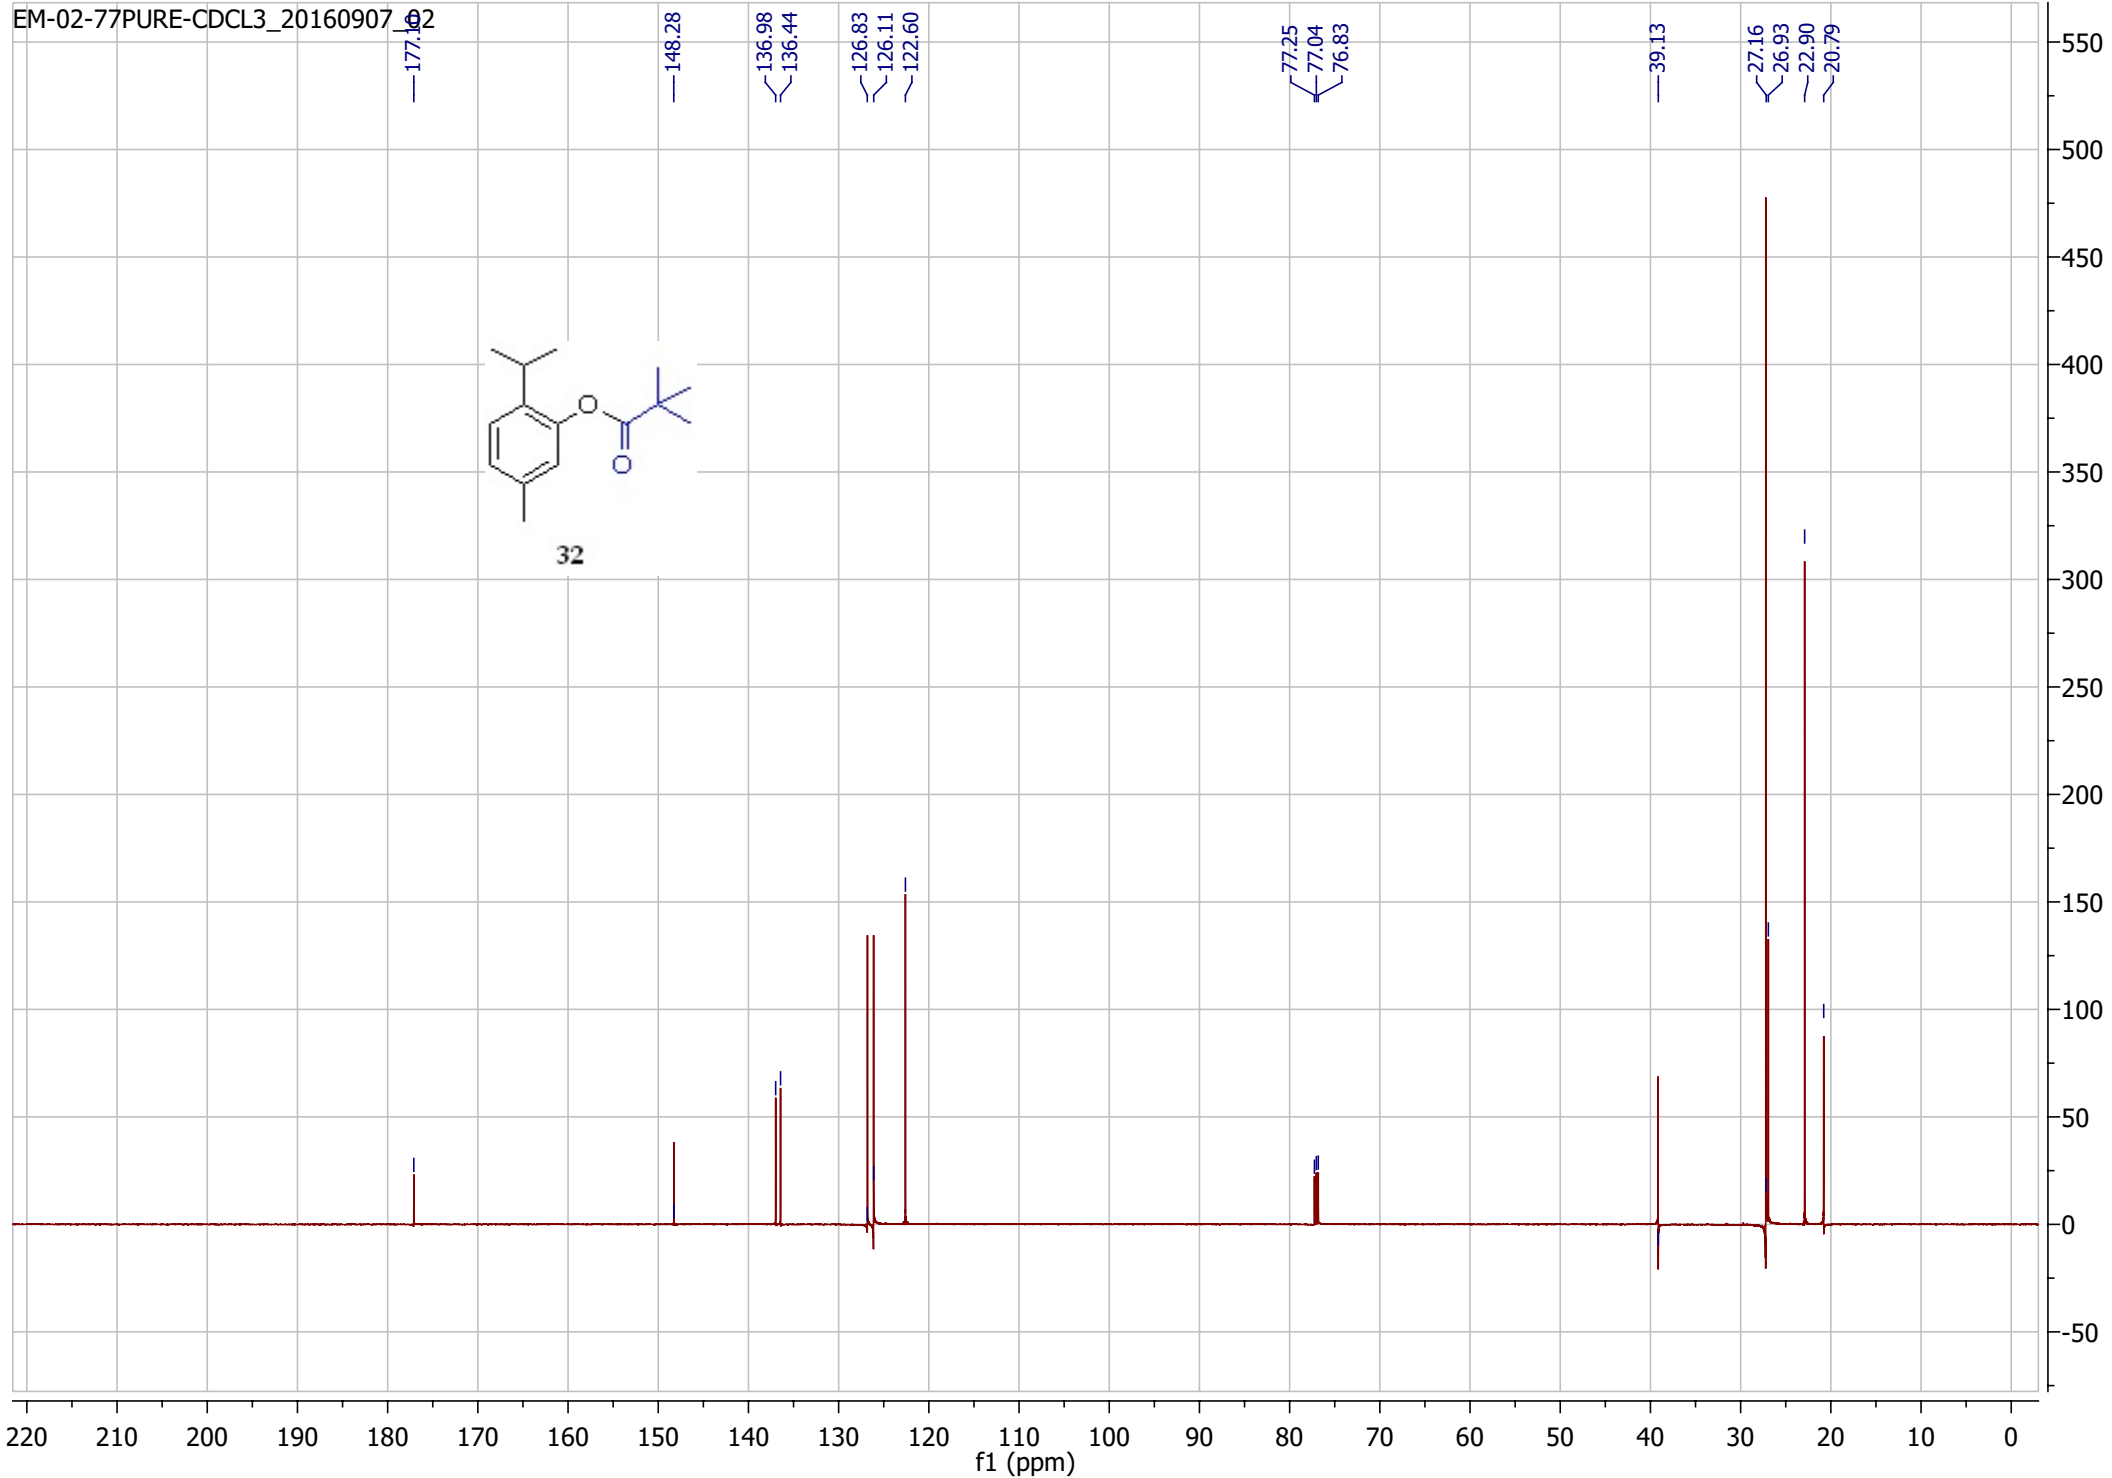

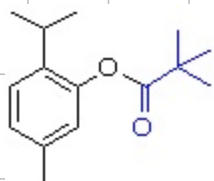

32

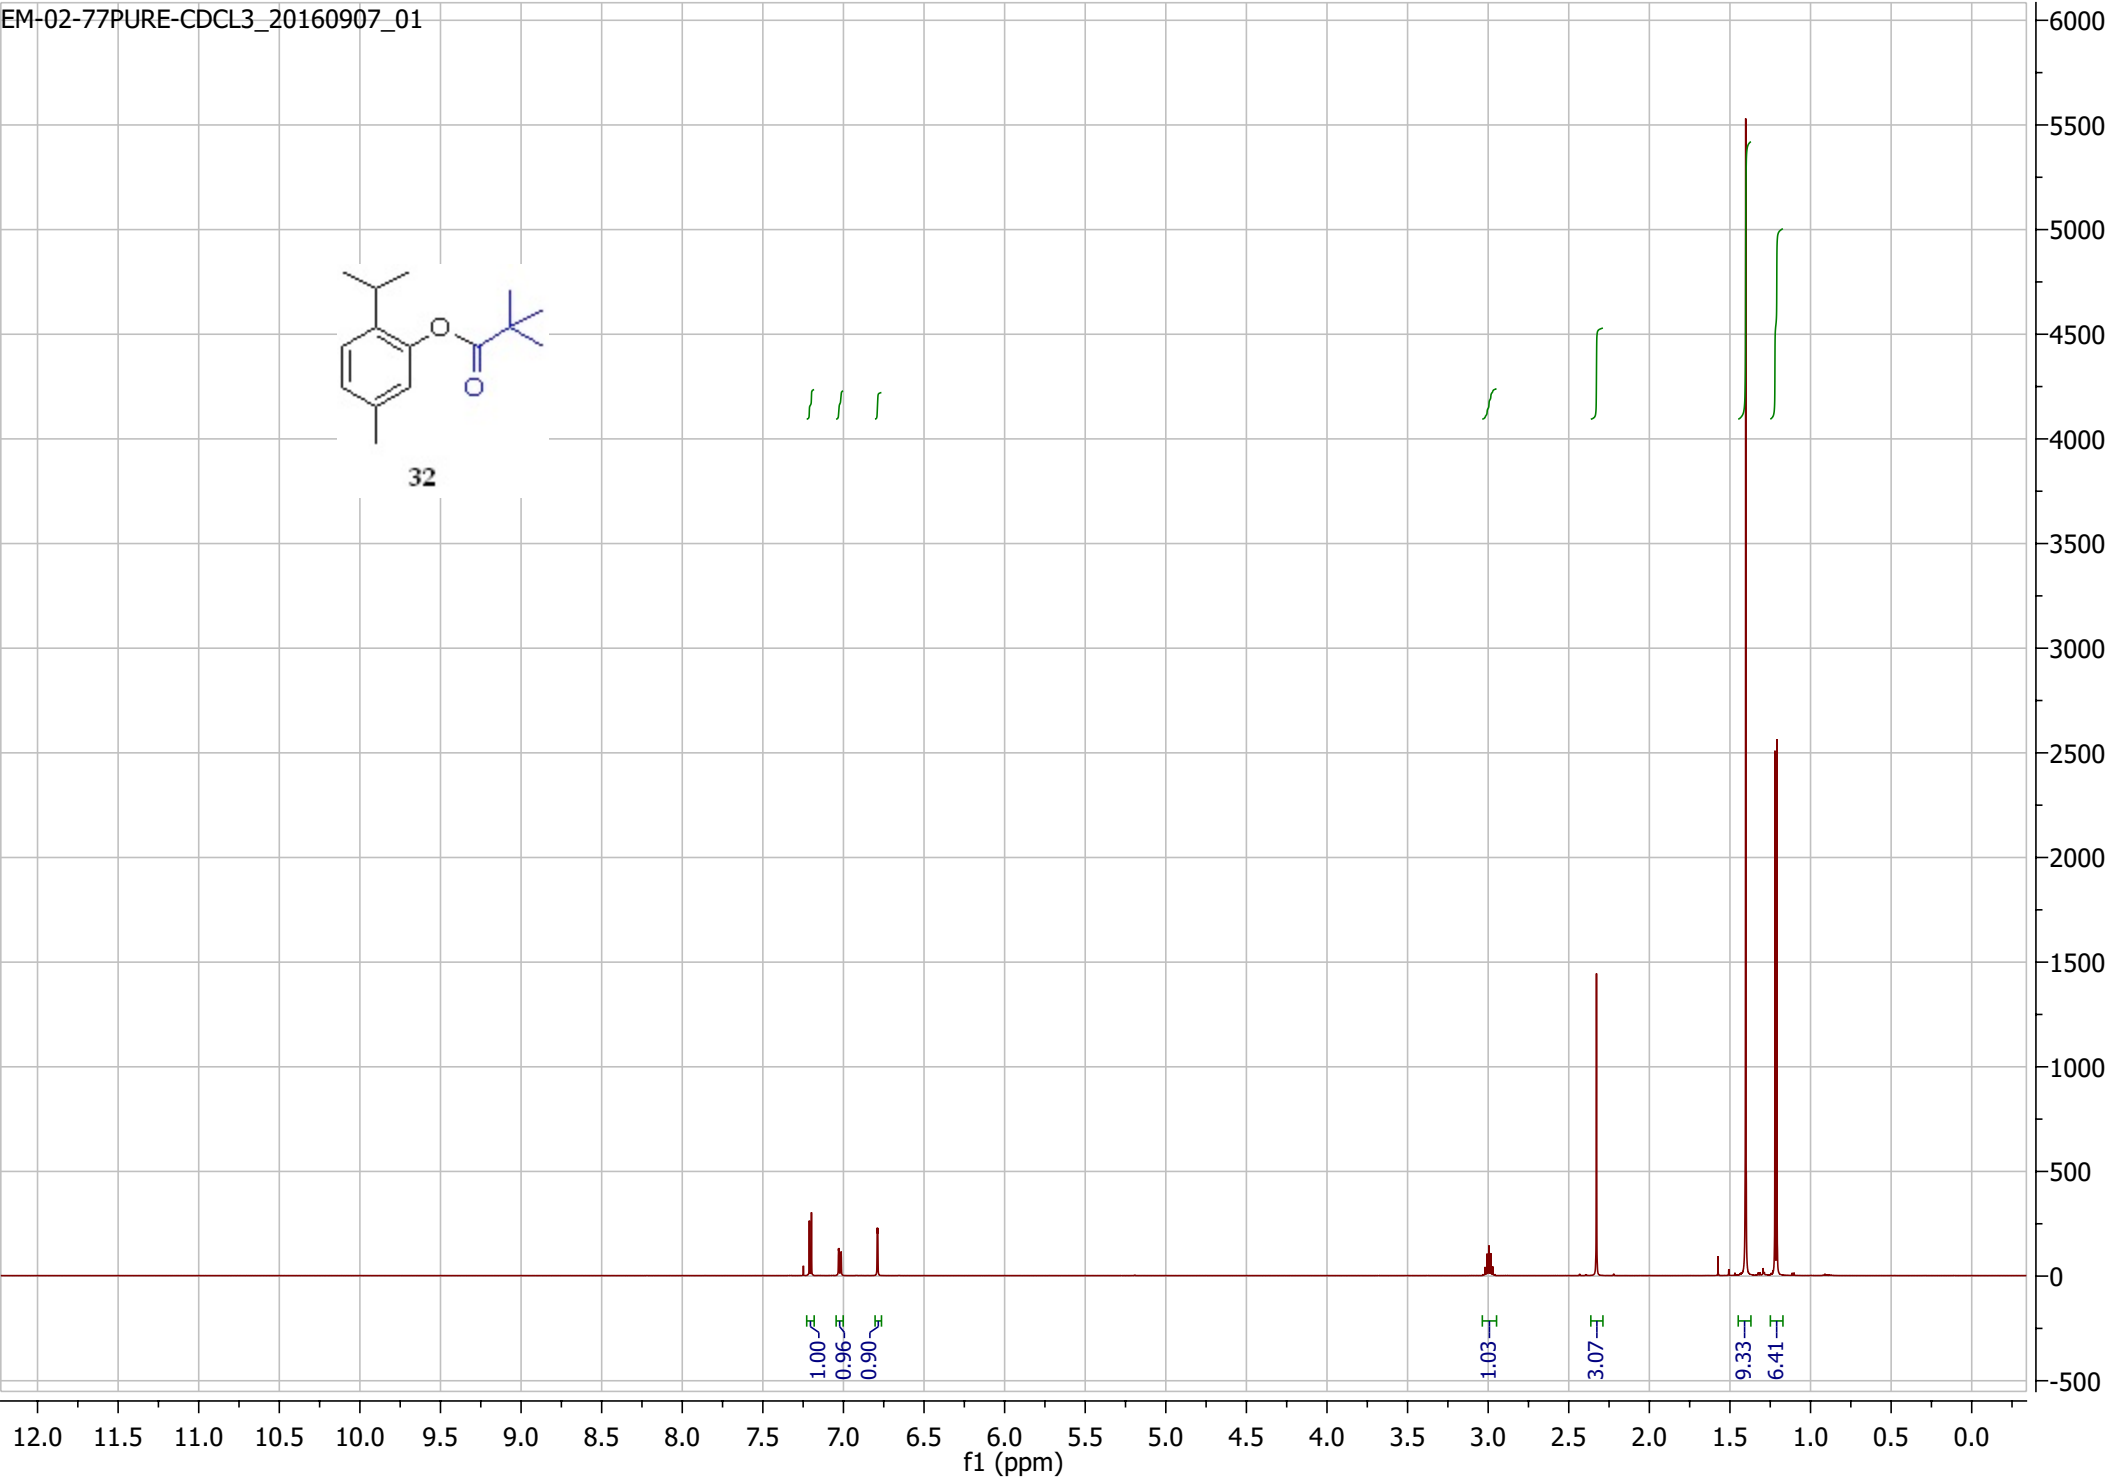

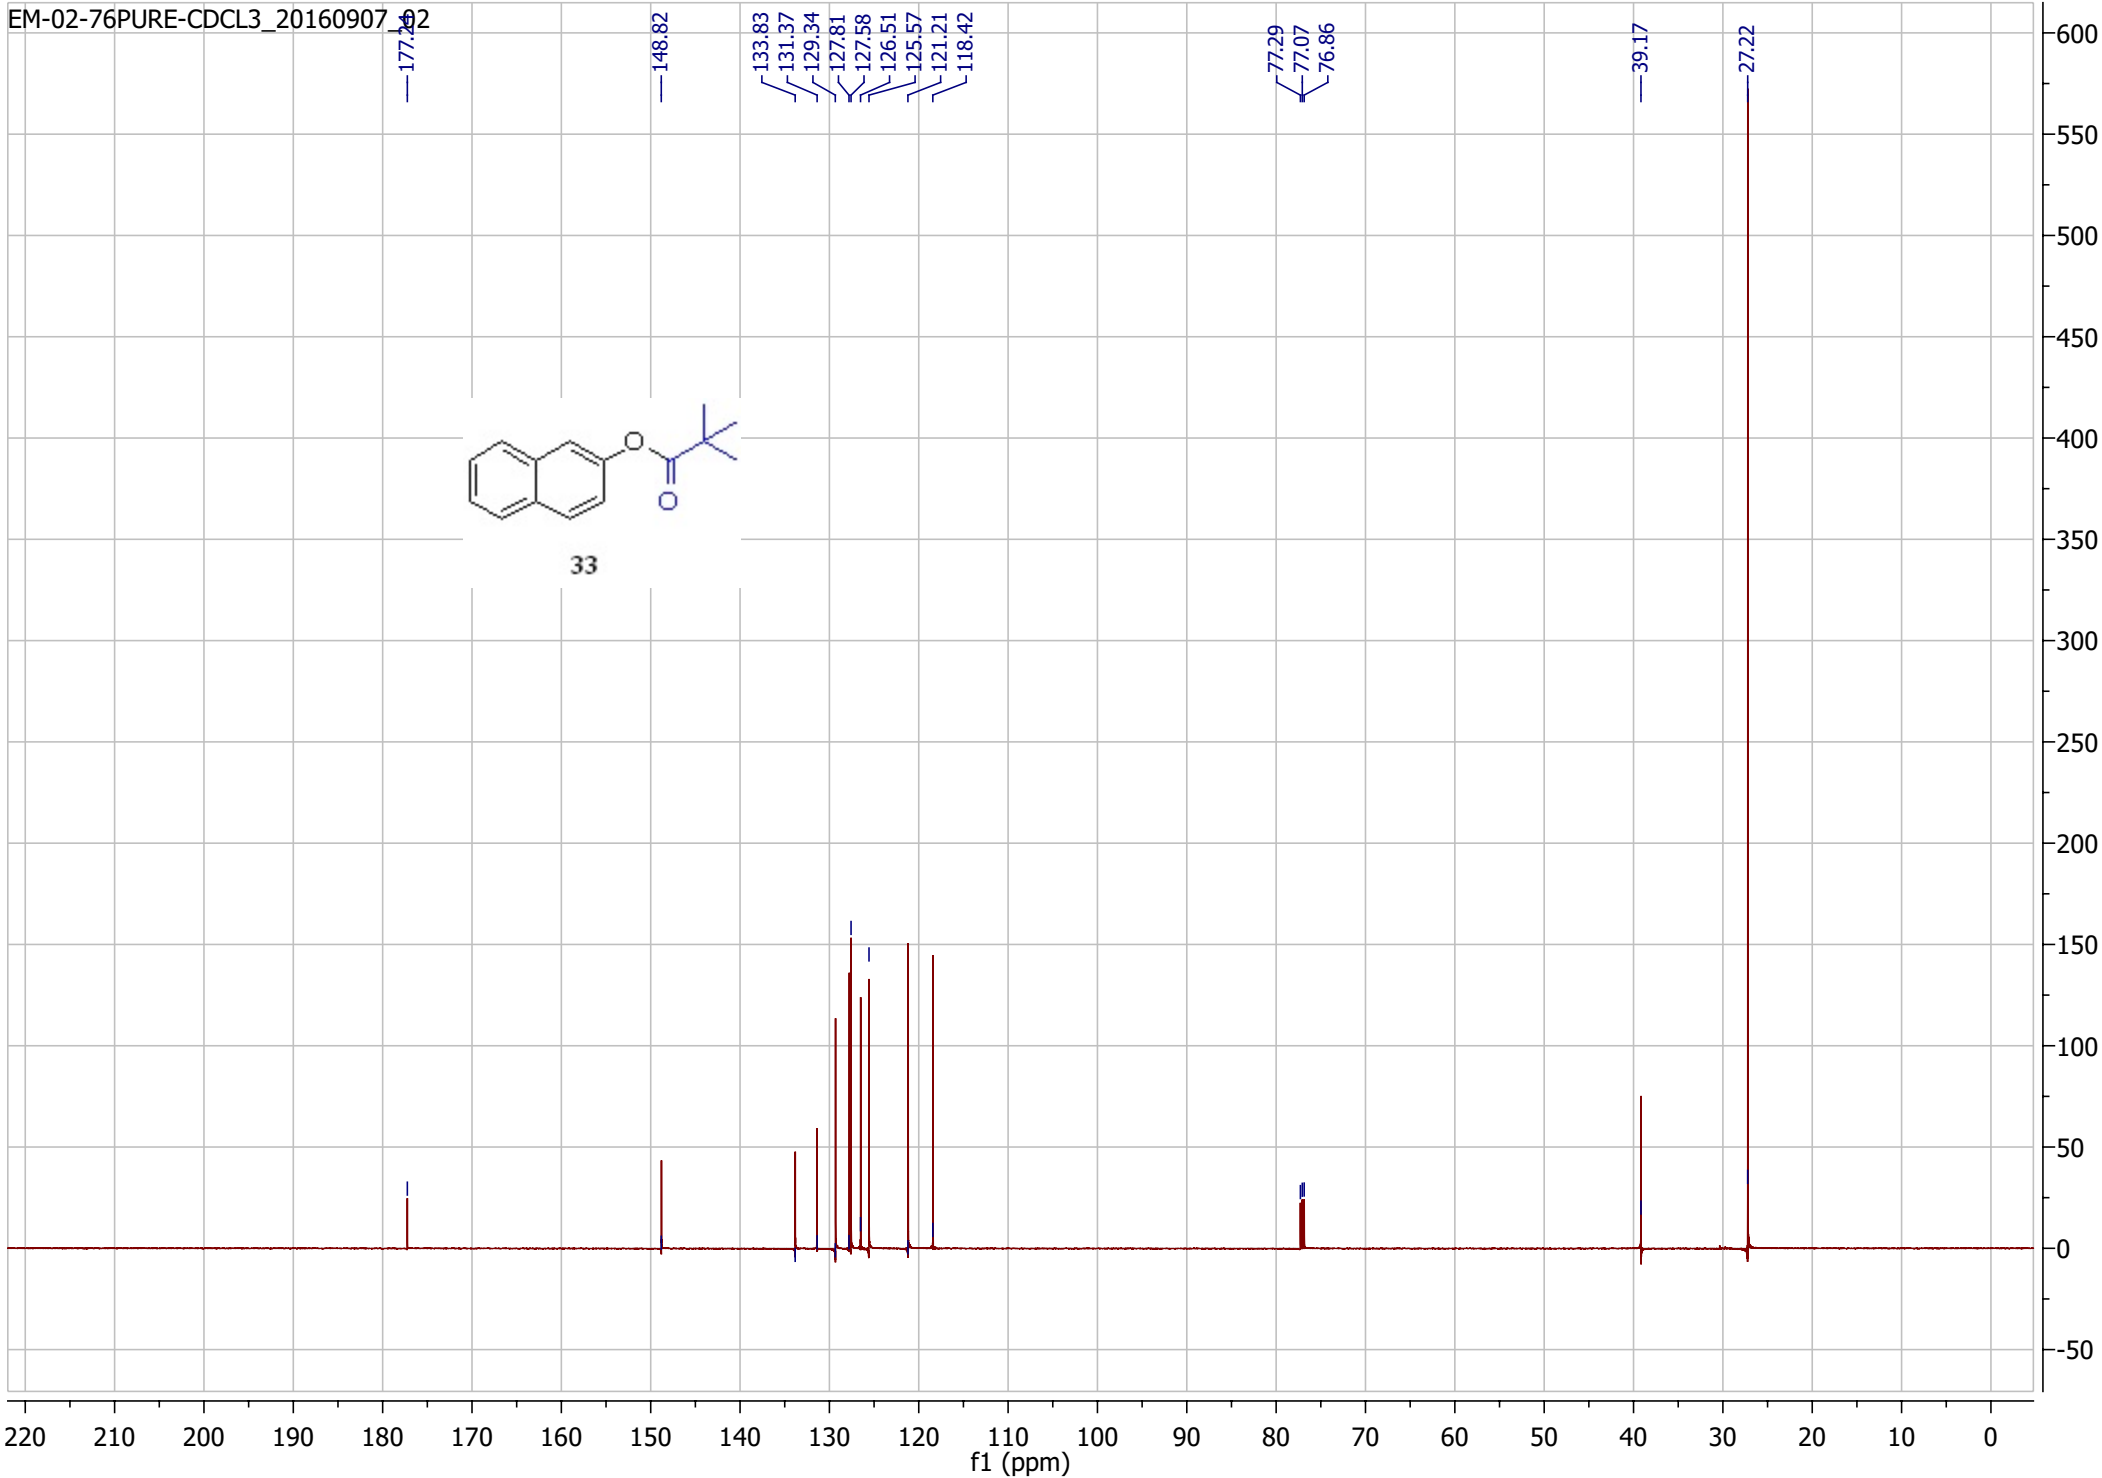

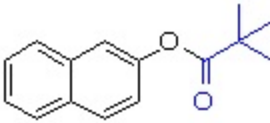

33

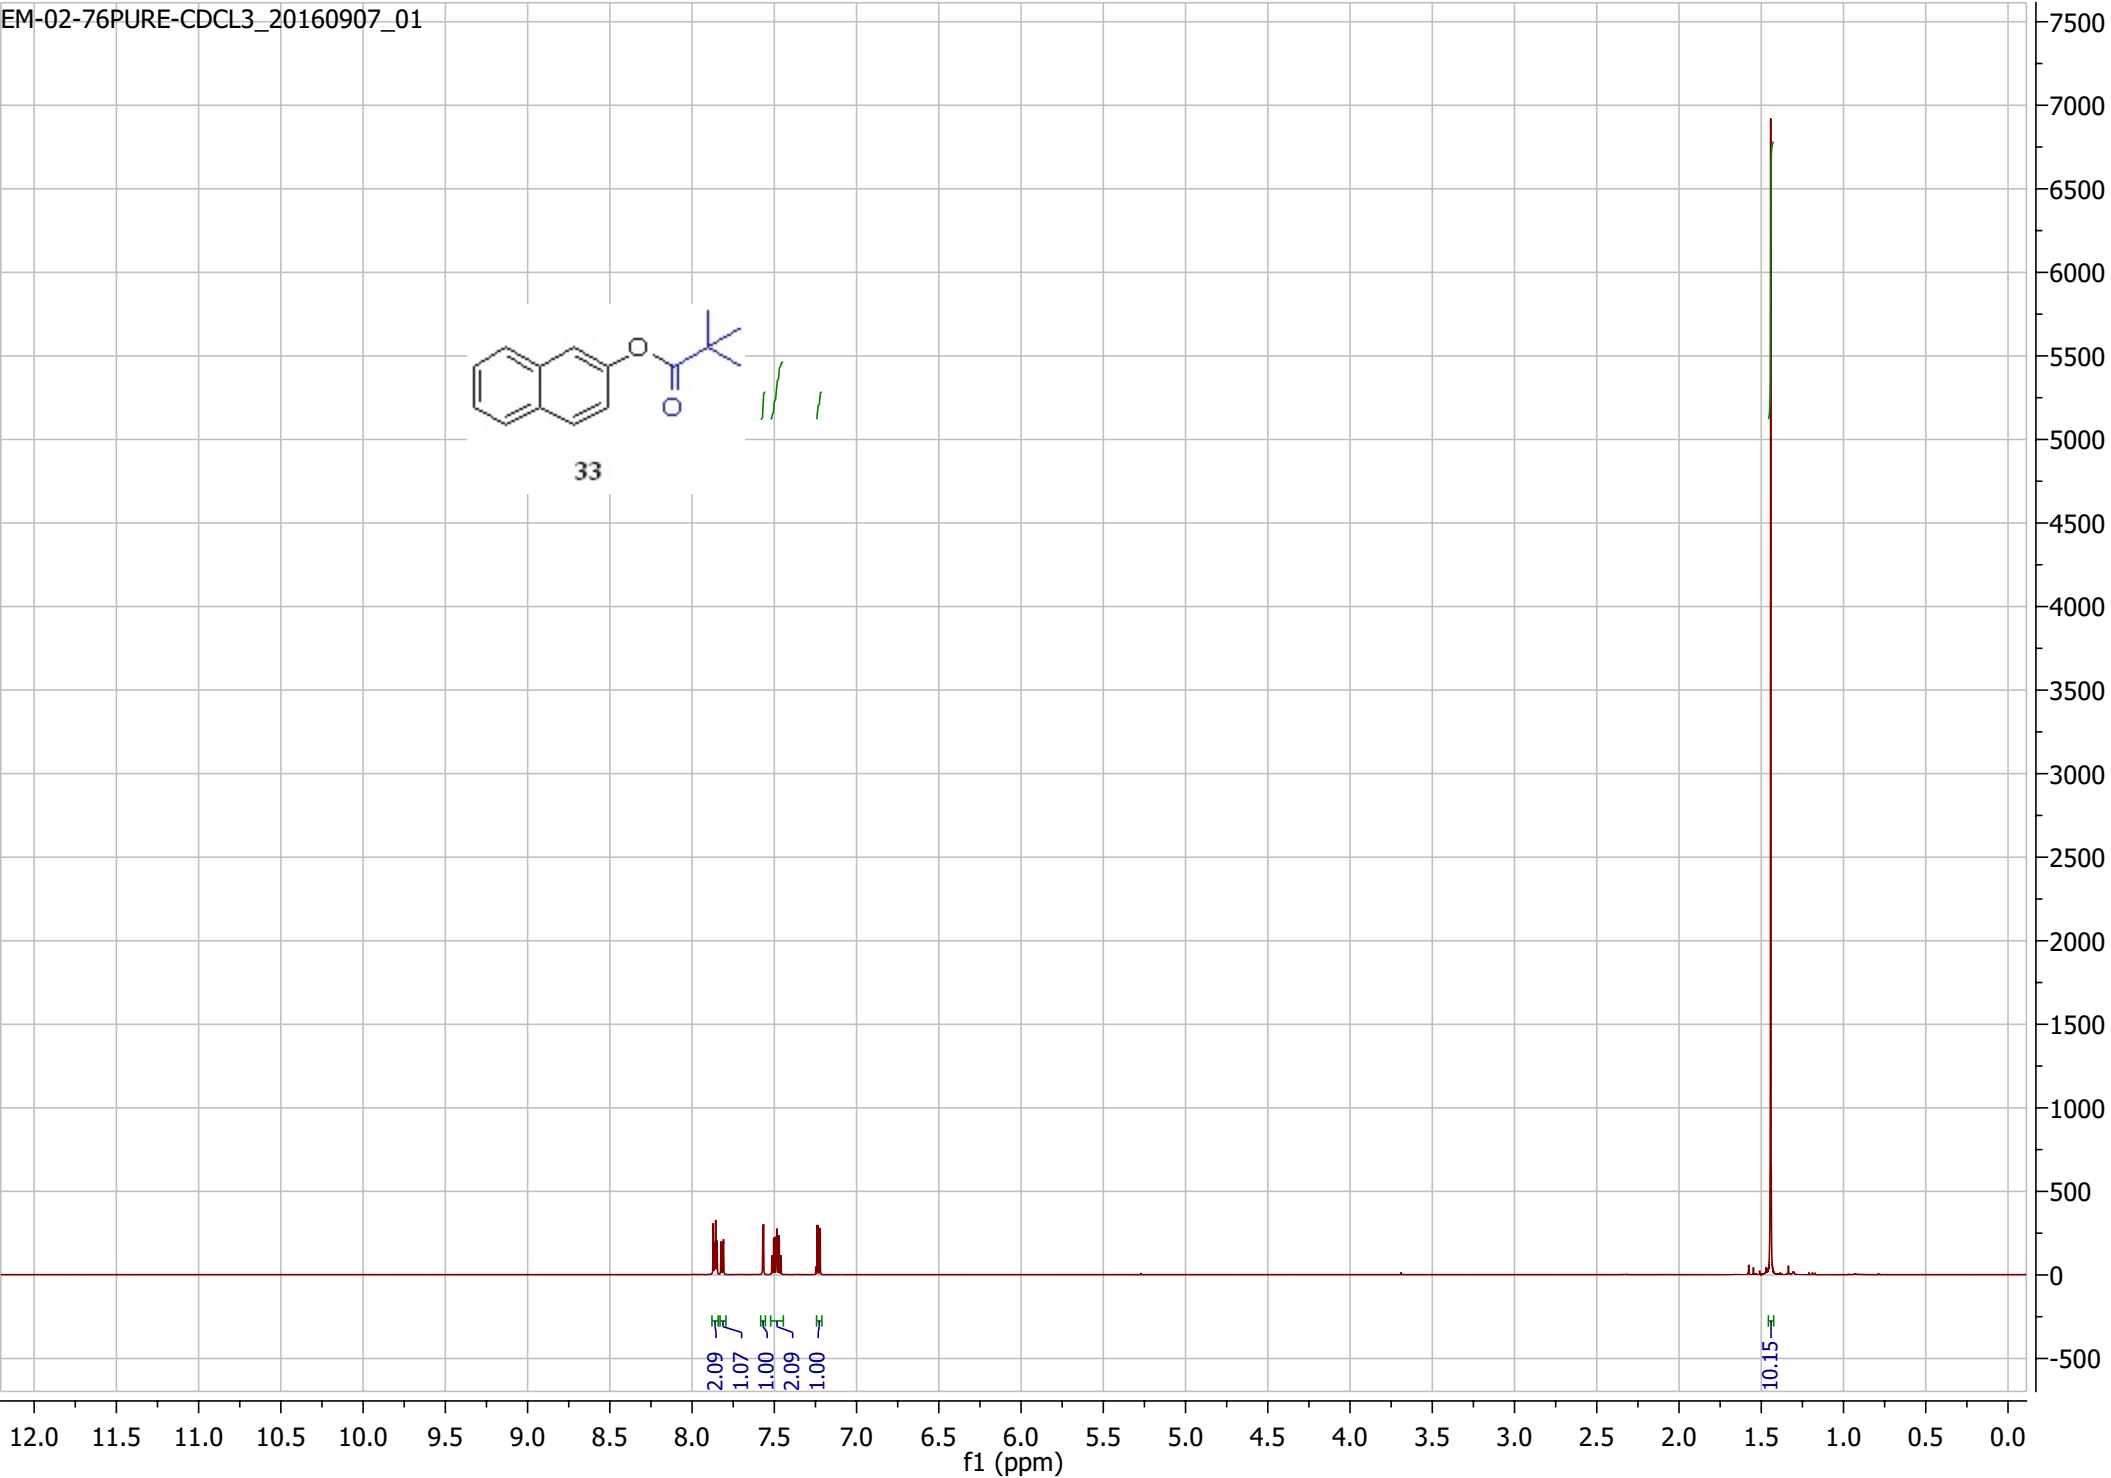

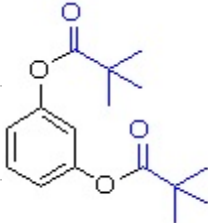

34

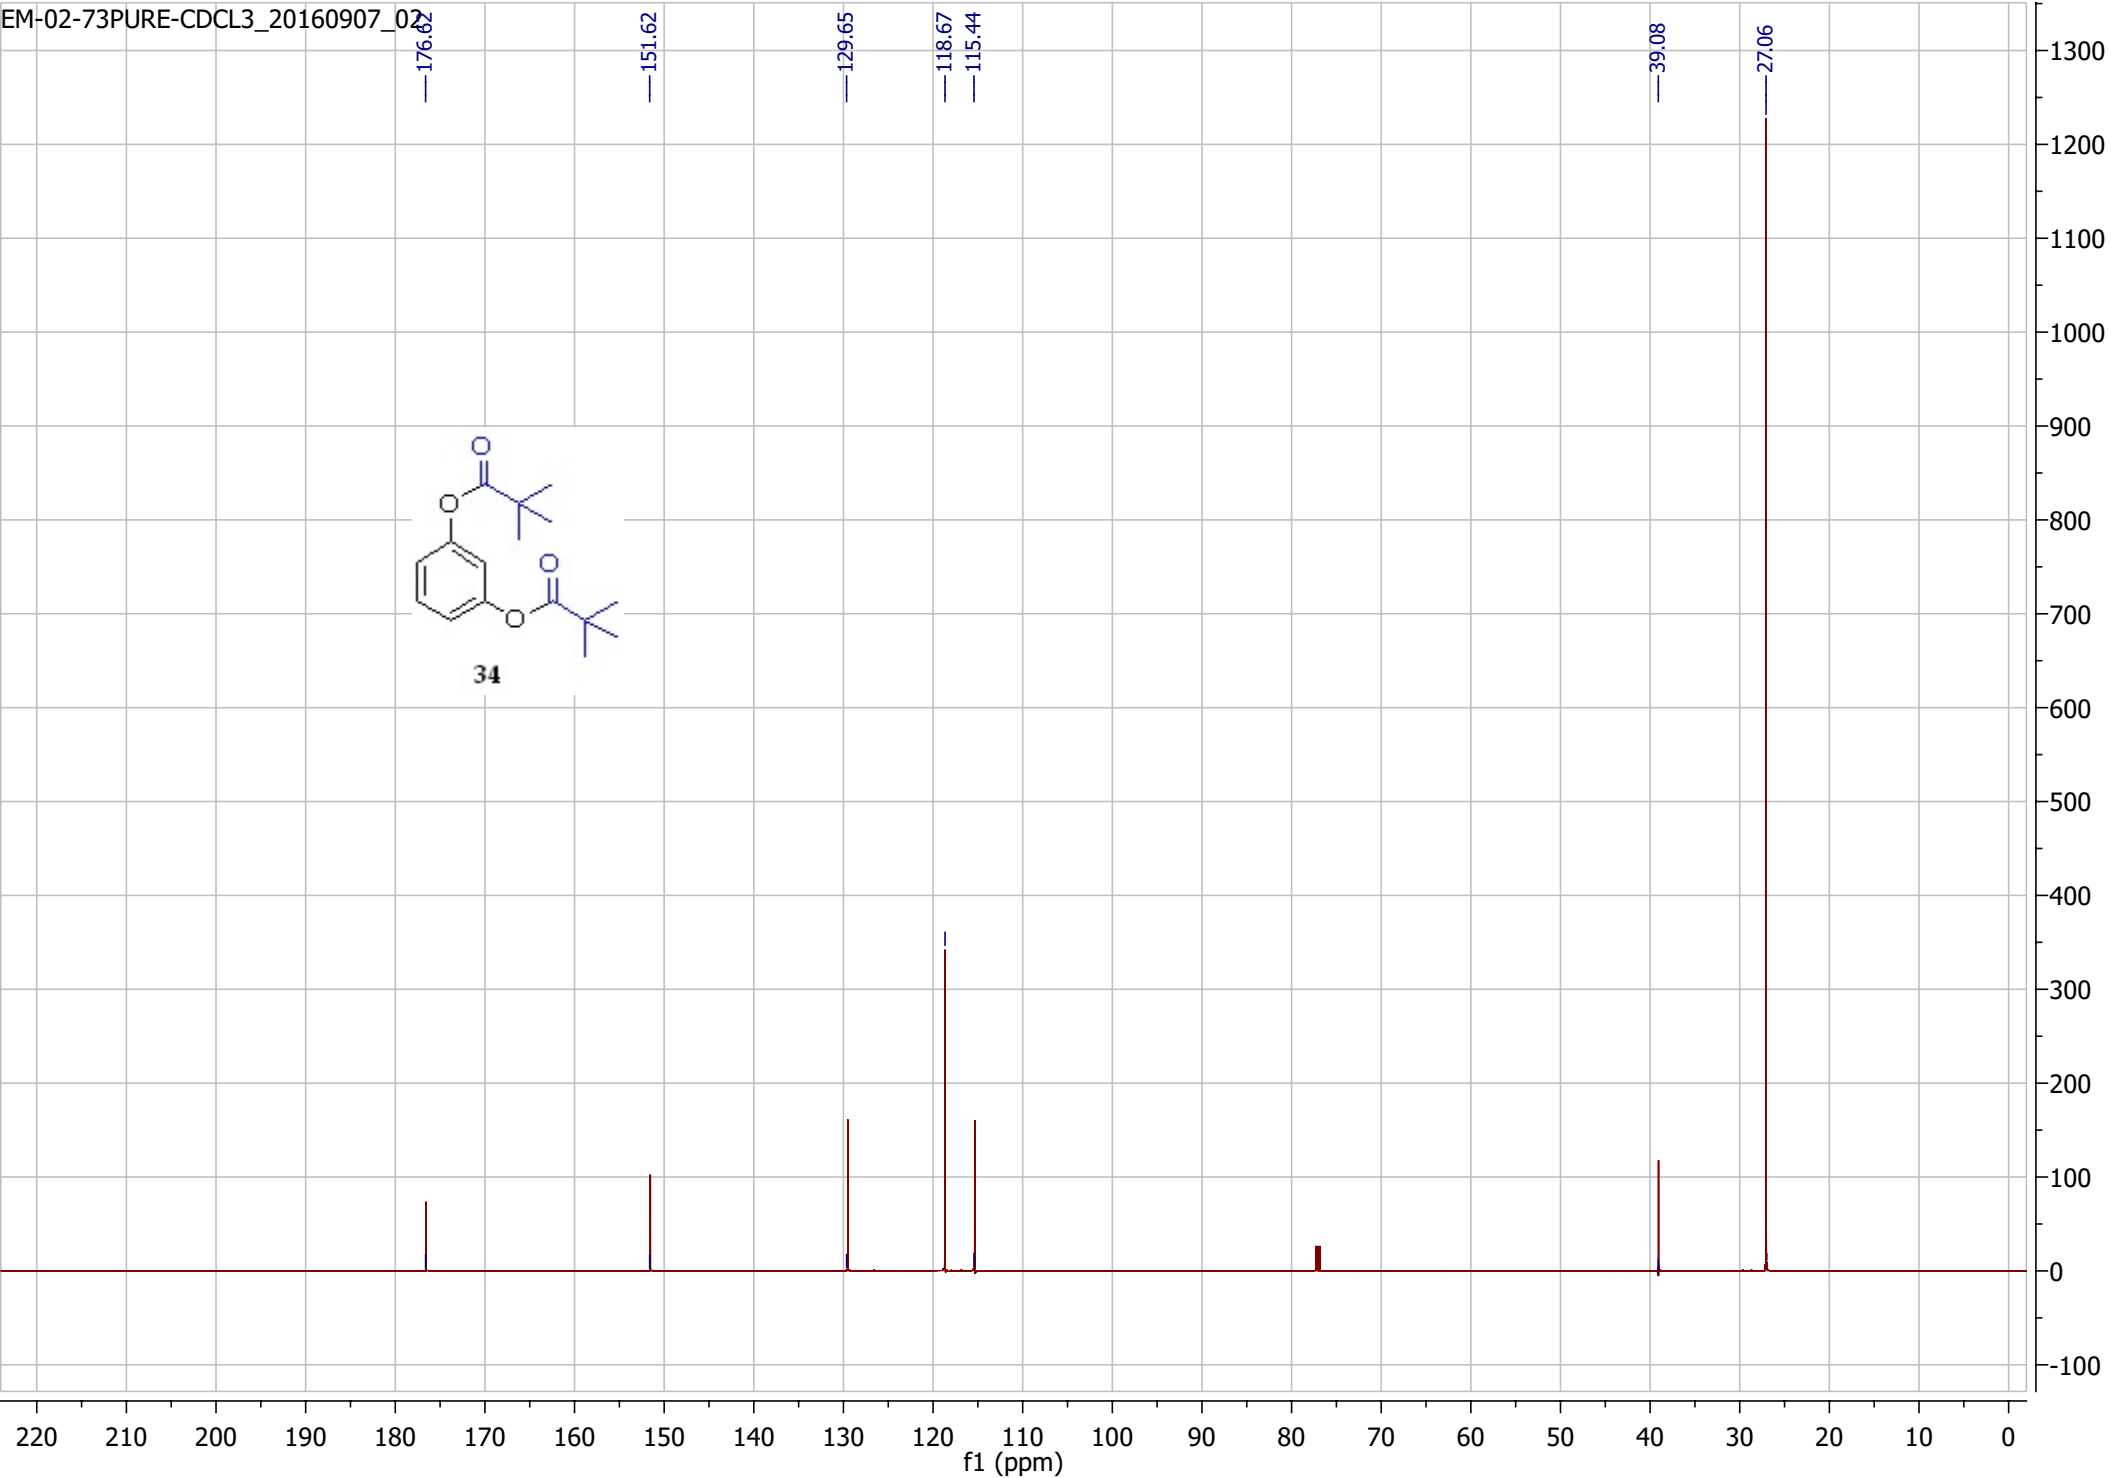

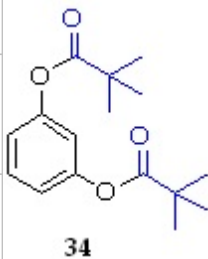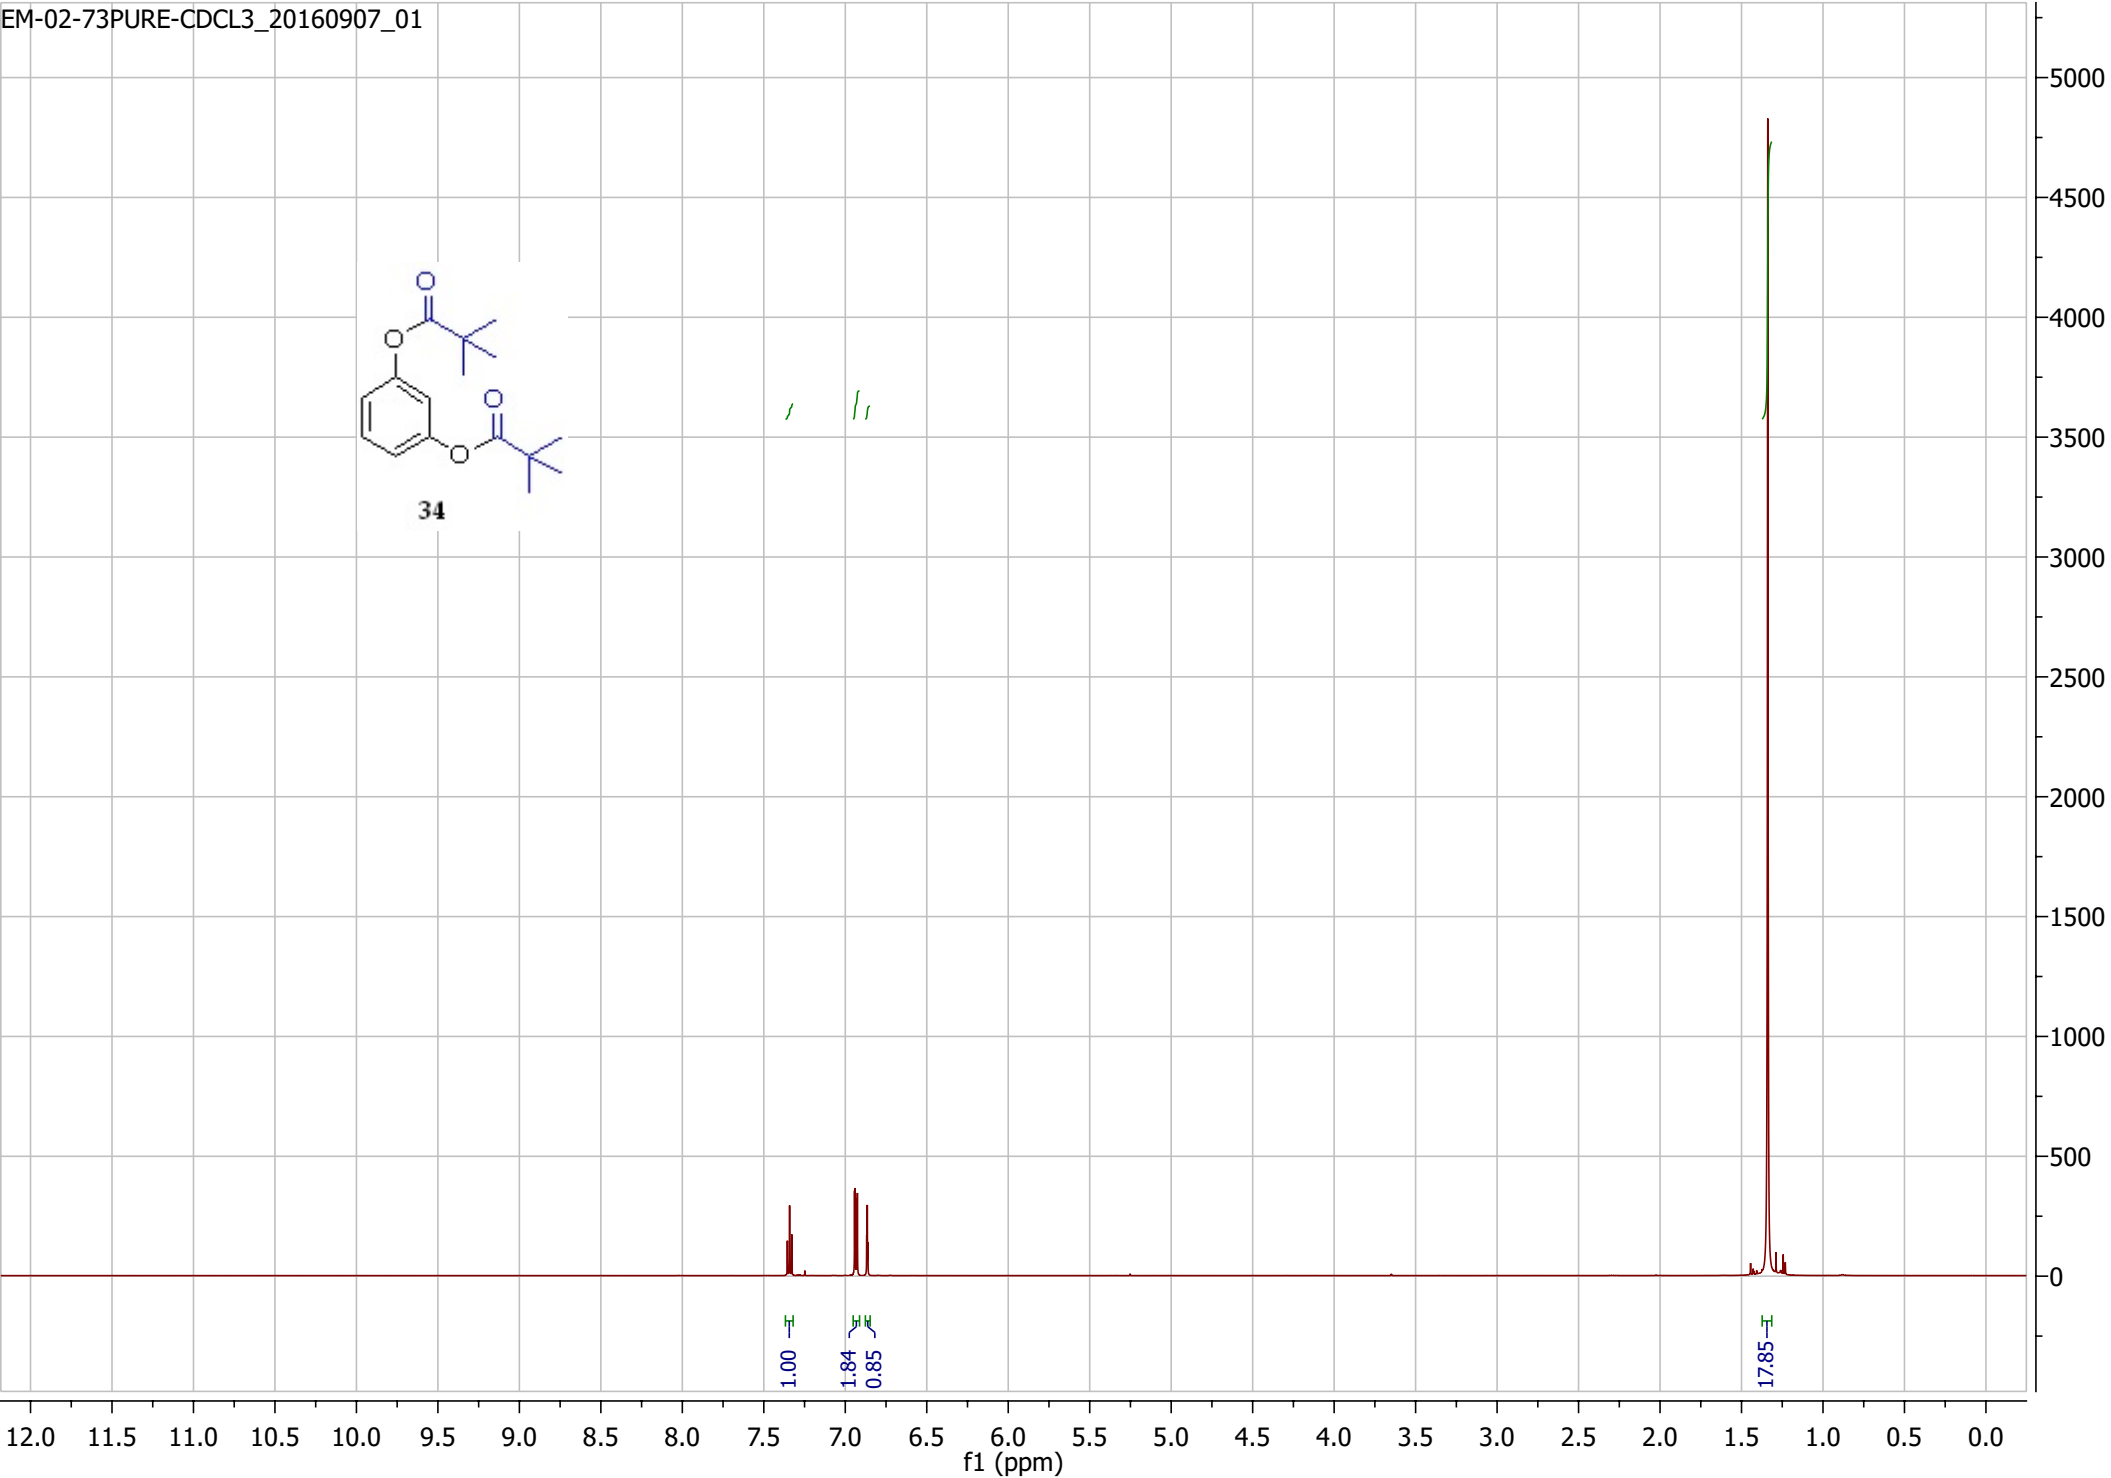

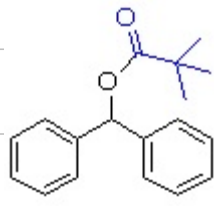

35

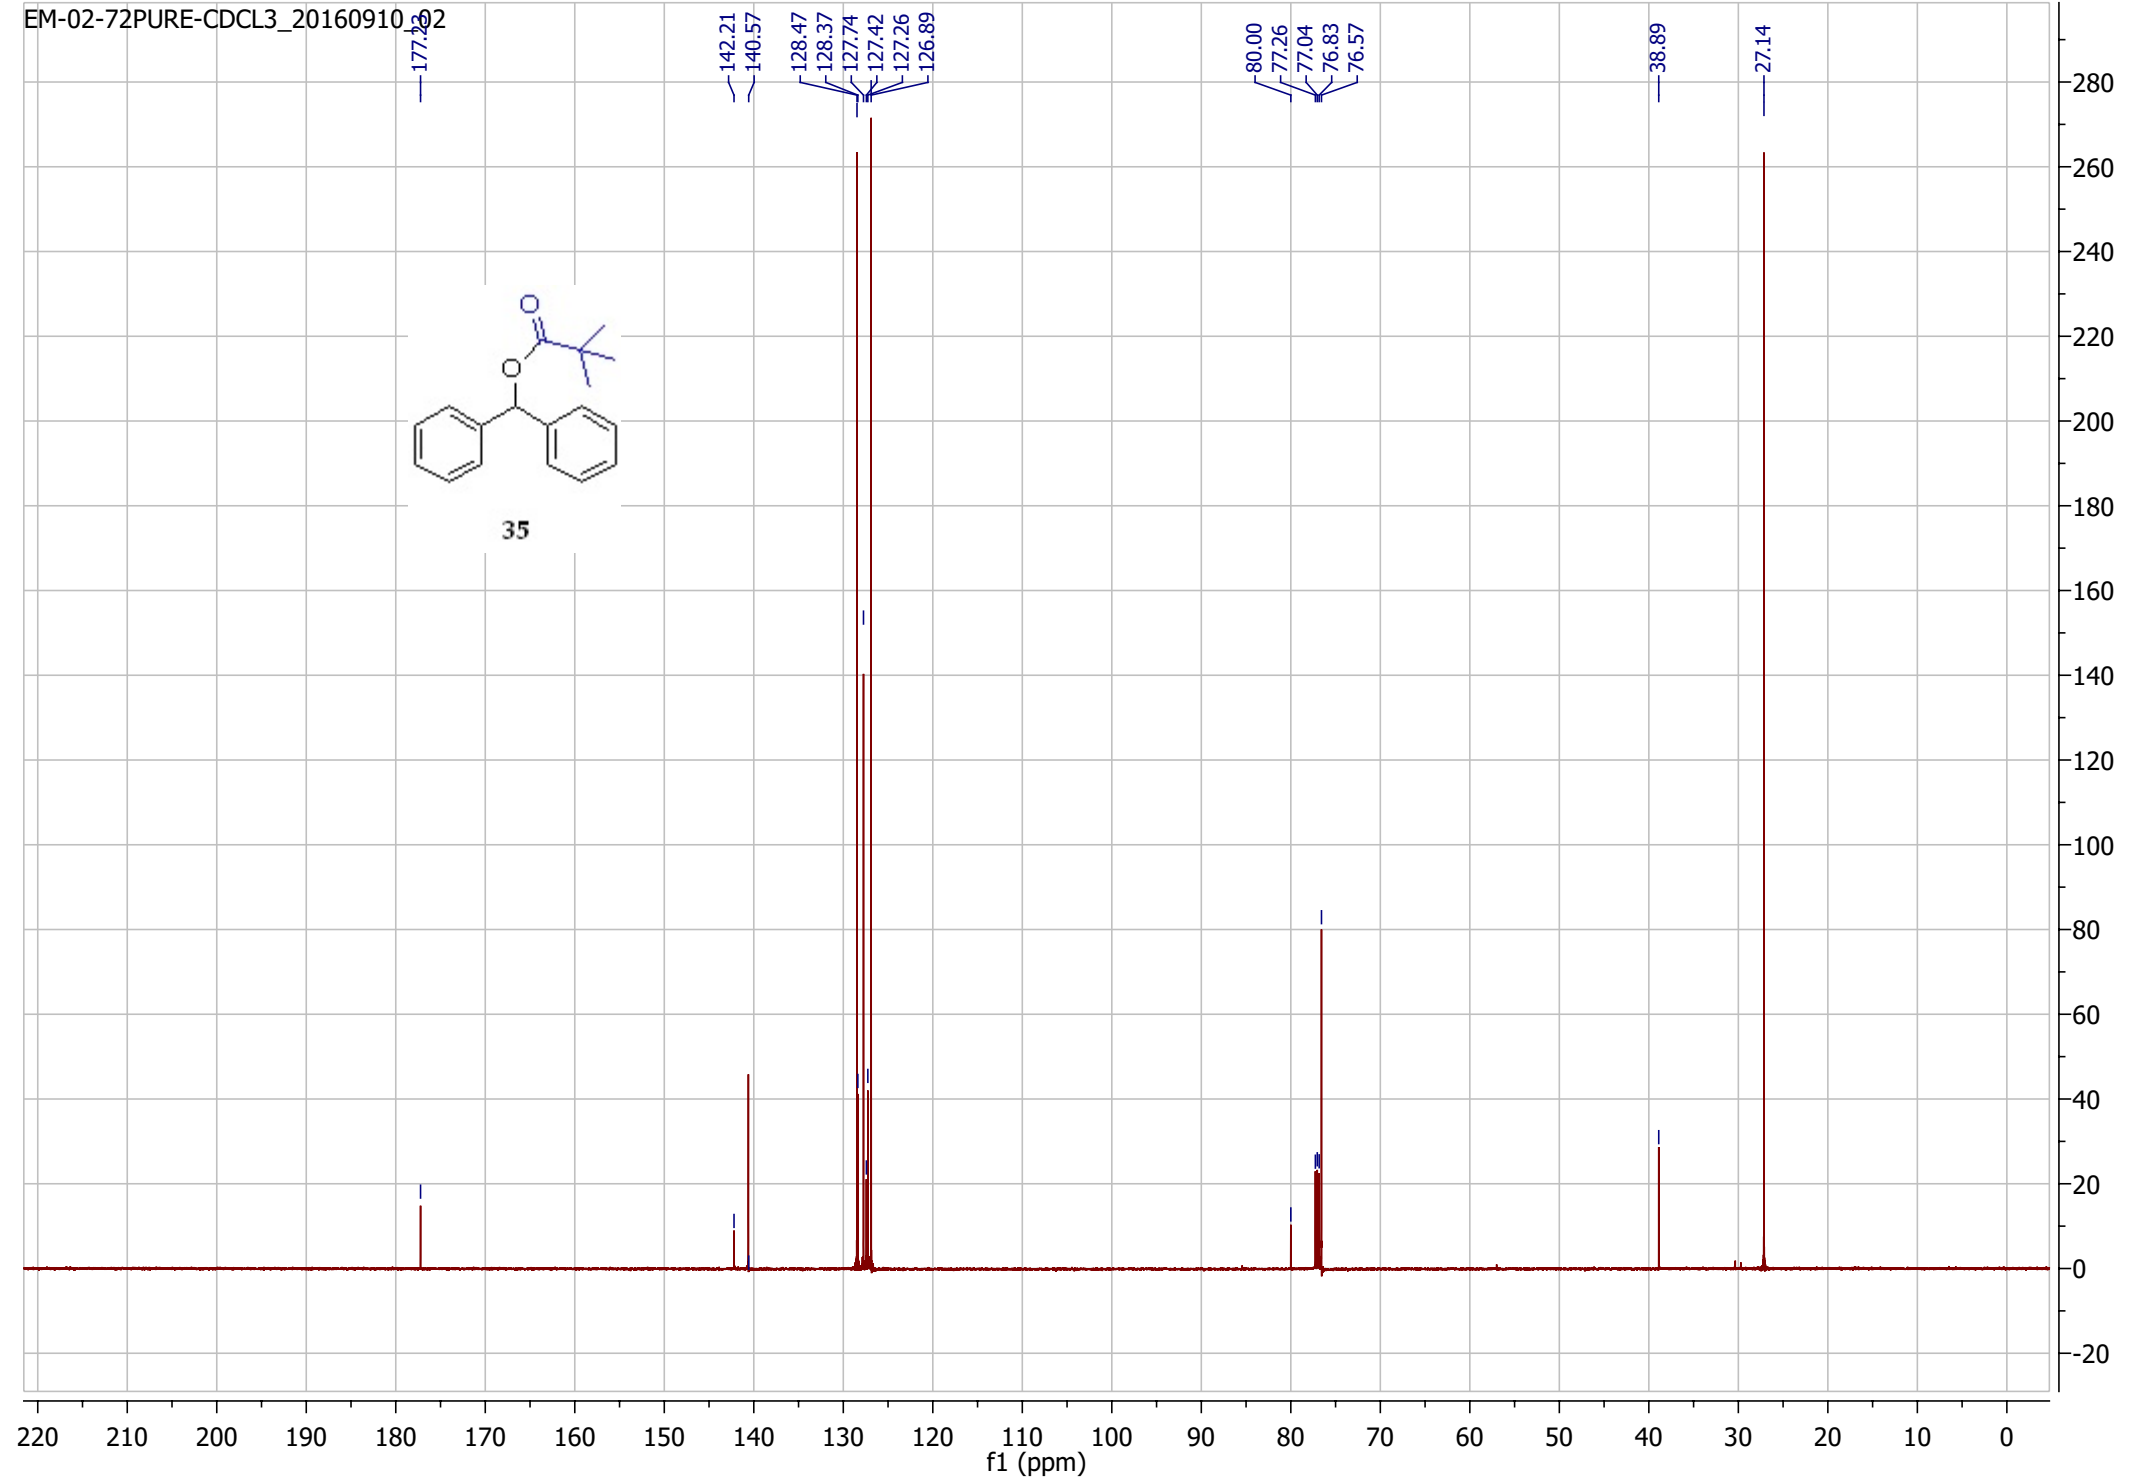

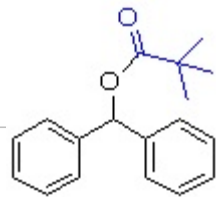

35

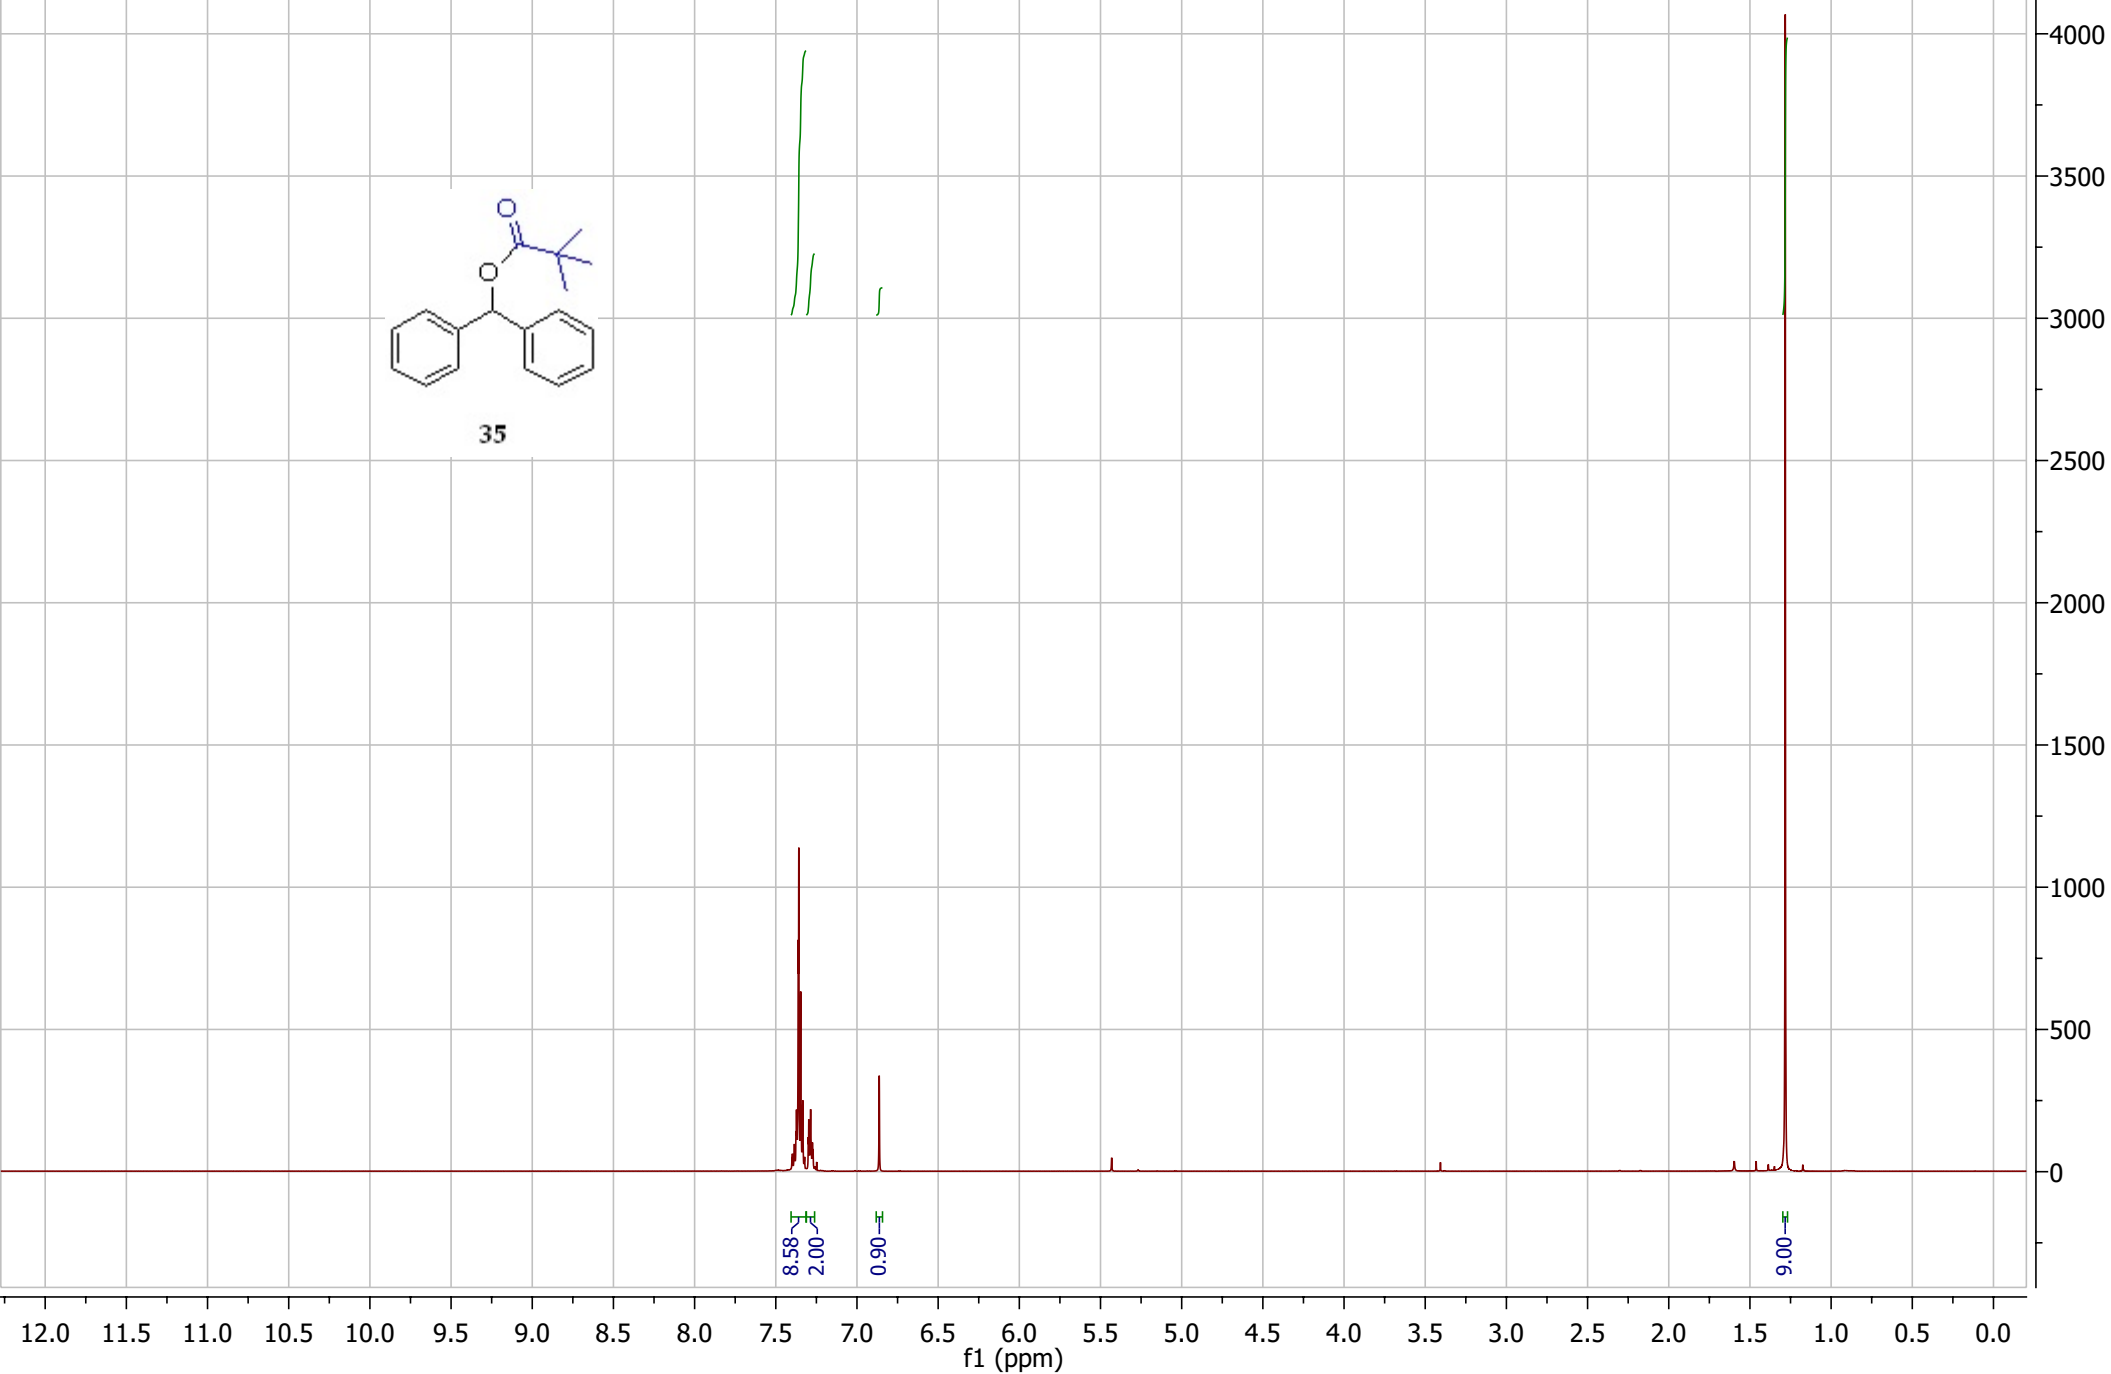

Supplement: s1 [file s1]
